# Supplementary material for: Genome-Wide Transcriptional Dynamics in the Companion Bacterial Symbionts of the Glassy-Winged Sharpshooter (Cicadellidae: Homalodisca vitripennis) Reveal Differential Gene Expression in Bacteria Occupying Multiple Host Organs
Source: G3 (Bethesda). 2017 Jul 13;7(9):3073–82. doi: 10.1534/g3.117.044255 (PMC5592932; doi:10.1534/g3.117.044255)
Supplement: Supplementary file 4 [file 3073TableS1.xlsx]

## Sheet: Red vs B-GWSS
Gene Name	Red Bacteriome vs. B-GWSS CP000238
	% Pairwise Identity	%GC	Max Sequence Length	Min Sequence Length
accA	0.998	0.375	960	960
accB	1	0.36	453	453
accC	1	0.361	1350	1350
accD	1	0.398	888	888
aceE	1	0.316	2670	2670
aceF	1	0.267	1290	1290
ackA	1	0.351	1203	1203
acpP	1	0.363	234	234
acpS	0.998	0.375	441	441
adk	1	0.335	642	642
ahpC	1	0.355	603	603
alaS	1	0.377	2655	2655
amiB	1	0.311	1218	1218
apaH	1	0.366	867	867
argS	1	0.344	1737	1737
aroA	1	0.352	1287	1287
aroB	1	0.344	1080	1080
aroC	1	0.37	1068	1068
aroE	1	0.316	765	765
aroH	1	0.378	996	996
aroK	1	0.385	522	522
aroQ	1	0.349	504	504
artI	1	0.233	729	729
artM	0.997	0.253	672	672
artP	1	0.302	729	729
artQ	1	0.267	696	696
asnS	1	0.348	1404	1404
aspA	1	0.359	1419	1419
aspC	0.999	0.332	1191	1191
aspS	1	0.324	1770	1770
atpA	1	0.314	1542	1542
atpB	0.999	0.256	822	822
atpC	1	0.3	423	423
atpD	1	0.364	1374	1374
atpE	1	0.325	243	243
atpF	1	0.261	471	471
atpG	1	0.282	864	864
atpH	1	0.283	534	534
bioA	0.999	0.391	1302	1302
bioB	0.999	0.357	1029	1029
bioC	1	0.373	762	762
bioD	1	0.389	678	678
bioF	1	0.377	1179	1179
bioH	1	0.285	762	762
birA	0.999	0.286	849	849
bolA	1	0.295	258	258
carA	0.999	0.362	1161	1146
carB	1	0.364	3240	3240
cca	1	0.395	1239	1239
cdsA	0.999	0.33	855	855
clpB	1	0.375	2721	2721
clpP	1	0.362	618	618
clpX	1	0.34	1266	1266
cls	0.999	0.34	1452	1452
cmk	1	0.379	678	678
coaA	1	0.286	939	939
coaD	1	0.362	492	492
coaE	1	0.286	612	612
corA	0.999	0.342	951	951
crp	1	0.344	633	633
cspE	1	0.359	270	270
csrA	1	0.409	186	186
cvpA	1	0.307	486	486
cyaA	0.999	0.275	1200	1200
cyoA	1	0.306	915	915
cyoB	1	0.357	1998	1998
cyoC	1	0.307	612	612
cyoE	0.999	0.29	867	867
cysA	1	0.354	1134	1134
cysB	1	0.379	975	975
cysC	1	0.391	624	624
cysD	1	0.389	909	909
cysE	1	0.415	816	816
cysG	1	0.406	1389	1389
cysH	0.997	0.382	738	738
cysI	1	0.385	1701	1701
cysJ	1	0.379	1788	1788
cysK	1	0.387	966	966
cysN	1	0.382	1443	1443
cysQ	1	0.37	744	744
cysS	1	0.335	1389	1389
cysT	0.999	0.358	831	831
cysW	1	0.346	843	843
dacB	1	0.327	1428	1428
dapF	1	0.356	825	825
dcd	1	0.371	582	582
ddlA	1	0.336	1128	1128
deaD	0.999	0.383	1791	1791
dedA	0.998	0.317	651	651
def	1	0.31	504	504
degQ	0.999	0.357	1383	1383
dfp	1	0.39	1215	1215
dksA	1	0.364	456	456
dnaB	1	0.373	1413	1413
dnaE	1	0.334	3492	3492
dnaG	0.999	0.336	1788	1788
dnaJ	1	0.393	1119	1119
dnaK	1	0.374	1896	1896
dnaN	1	0.299	1113	1113
dnaQ	1	0.259	723	723
dnaX	0.999	0.336	1155	1155
dsbA	1	0.293	672	672
dsrE	1	0.32	372	372
dsrF	1	0.289	360	360
dsrH	1	0.313	288	288
dsvC	0.998	0.3	492	492
dut	1	0.375	453	453
dxr	0.999	0.368	1197	1197
dxs	1	0.384	1902	1902
ecfE	1	0.308	1380	1380
efp	1	0.328	570	570
emrA	1	0.32	1212	1212
emrB	0.999	0.32	1518	1518
engA	1	0.315	1419	1419
engB	1	0.286	609	609
eno	1	0.364	1302	1302
era	1	0.339	906	906
exsB	1	0.35	717	717
fabA	1	0.375	522	522
fabB	1	0.368	1221	1221
fabD	1	0.371	963	963
fabG	1	0.365	735	735
fabH	1	0.378	954	954
fabI	1	0.366	789	789
fabZ	1	0.371	450	450
fbaA	1	0.305	1077	1077
ffh	1	0.353	1350	1350
fldA	1	0.33	531	531
fliY	1	0.342	783	783
fmt	1	0.356	936	936
folA	1	0.325	498	498
folB	1	0.331	366	366
folC	1	0.359	1281	1281
folD	1	0.366	858	858
folE	1	0.341	663	663
folK	1	0.361	504	504
folP	1	0.354	867	867
frr	1	0.317	558	558
ftn	0.998	0.267	489	489
ftsE	1	0.315	642	642
ftsH	1	0.36	1884	1884
ftsK	1	0.259	2028	1962
ftsX	0.999	0.308	951	951
ftsY	1	0.322	1065	1065
ftsZ	1	0.35	1173	1173
fumC	0.999	0.349	1392	1362
fusA	1	0.358	2118	2118
gapA	1	0.349	1071	1071
gcp	1	0.411	1026	1026
gcvT	0.999	0.25	978	978
genea	1	0.35	759	759
genX	1	0.321	984	984
gidA	0.998	0.301	1896	1896
glmM	1	0.36	1338	1338
glmS	1	0.313	1839	1839
glmU	1	0.299	1410	1410
glnS	1	0.326	1671	1671
globa	1	0.34	630	630
gloB	1	0.293	774	774
gltP	0.999	0.318	1349	1347
gltX	1	0.323	1401	1401
gluta	1	0.314	360	360
glyA	1	0.353	1254	1254
glyQ	0.999	0.369	909	909
glyS	1	0.32	2100	2100
gmk	1	0.337	615	615
gnd	1	0.353	1407	1407
gpmA	1	0.338	714	714
gpsA	1	0.407	1023	1023
greA	1	0.34	477	477
groEL	0.999	0.393	1641	1641
groES	1	0.418	294	294
grpE	1	0.365	597	597
gshA	0.999	0.363	1572	1572
gshB	1	0.327	954	954
guaA	1	0.324	1581	1581
guaB	1	0.373	1458	1458
gyrA	1	0.367	2544	2544
gyrB	1	0.32	2409	2409
hemC	1	0.402	936	936
hemD	1	0.381	741	741
hemK	1	0.381	846	846
hesB	1	0.313	348	348
hflC	1	0.386	1002	1002
hflK	0.999	0.391	1161	1161
hflX	1	0.35	1284	1284
hfq	1	0.318	261	261
hisA	1	0.388	747	747
hisB	1	0.342	1071	1071
hisC	1	0.361	1083	1083
hisD	1	0.38	1314	1314
hisF	1	0.367	777	777
hisG	1	0.367	900	900
hisH	1	0.372	594	594
hisI	1	0.337	624	624
hisS	1	0.333	1293	1293
hit	0.997	0.316	366	366
hns	1	0.326	411	411
holA	1	0.33	1038	1038
holB	0.999	0.315	999	999
holC	1	0.329	465	465
holD	1	0.36	408	408
hslU	1	0.389	1341	1341
hslV	1	0.396	543	543
hspQ	1	0.381	318	318
htpG	1	0.312	1896	1896
htpX	1	0.332	876	876
hup	1	0.351	285	285
hyp14	1	0.341	696	696
hyp15	1	0.254	126	126
hyp16	1	0.351	672	672
hyp17	1	0.327	165	165
hyp18	1	0.27	315	315
hyp1	1	0.321	408	408
hyp22	1	0.367	597	597
hyp23	0.999	0.303	534	534
hyp24a	0.99	0.191	102	102
hyp24	0.999	0.335	948	948
hyp25	1	0.252	234	234
hyp26a	0.997	0.337	432	408
hyp26	1	0.344	564	564
hyp27	1	0.264	522	522
hyp28	1	0.279	330	330
hyp29	1	0.33	267	267
hyp2	1	0.258	495	492
hyp30	1	0.304	2949	2949
hyp8	1	0.354	339	339
hyp9	1	0.29	1008	1008
hypA	1	0.271	96	96
hypo1	0.997	0.246	348	348
hypoz	1	0.232	99	99
ibpA	1	0.327	480	480
ileS	1	0.357	2817	2817
infA	1	0.329	219	219
infB	1	0.346	2643	2643
infC	0.998	0.334	516	516
iscS	0.999	0.36	1155	1155
ispA	1	0.346	915	915
ispD	1	0.39	726	726
ispE	0.999	0.361	876	876
ispF	1	0.375	477	477
ispG	1	0.347	1122	1122
ispH	0.999	0.367	942	942
ksgA	0.999	0.354	816	816
lepA	1	0.349	1809	1809
lepB	1	0.327	936	936
leuS	1	0.362	2586	2586
lgt	1	0.332	858	858
ligA	1	0.338	2016	2016
lipA	1	0.365	885	885
lipB	1	0.355	684	684
lnt	1	0.343	1521	1521
lolA	1	0.228	627	627
lolB	1	0.299	648	648
lolC	1	0.336	1194	1194
lolD	1	0.357	711	711
lolE	0.999	0.342	1248	1248
lona	1	0.33	1755	1755
lon	1	0.37	2355	2355
lpdA	1	0.289	1413	1413
lppA	1	0.328	345	345
lspA	0.998	0.303	504	504
lysP	1	0.346	1479	1479
lysS	1	0.271	1521	1521
m23F	0.998	0.358	1218	1218
manX	1	0.329	969	969
manY	1	0.35	801	801
manZ	1	0.354	840	840
map	1	0.342	795	795
marC	1	0.341	636	636
marR	1	0.319	426	426
mdtH	1	0.384	1302	1302
metA	0.999	0.309	921	921
metB	1	0.396	1164	1164
metC	0.998	0.361	1191	1191
metE	1	0.368	2295	2295
metF	1	0.347	909	909
metG	1	0.335	1644	1644
metJ	1	0.359	287	287
metK	0.999	0.384	1158	1158
metR	1	0.377	909	909
miaA	1	0.355	930	930
miaB	1	0.355	1356	1356
minC	1	0.33	696	696
minD	0.999	0.343	813	813
minE	1	0.305	282	282
mltC	0.999	0.29	1023	1023
mntH	1	0.32	1350	1350
mqo	0.999	0.316	1524	1524
mraW	1	0.336	954	954
mraY	1	0.317	1083	1083
mrdA	1	0.339	1866	1866
mrdB	0.999	0.329	1092	1092
mreB	1	0.42	1044	1044
mreC	1	0.311	867	867
mreD	1	0.247	477	477
murA	1	0.377	1257	1257
murB	1	0.309	1029	1029
murC	0.999	0.319	1473	1473
murD	1	0.309	1341	1341
murE	0.999	0.335	1488	1488
murF	1	0.327	1362	1362
murG	1	0.349	1077	1077
murI	0.999	0.226	825	825
mutH	1	0.369	675	675
mutL	1	0.347	1809	1809
mutM	1	0.383	810	810
mutS	1	0.386	2568	2568
mviN	1	0.359	1527	1527
nadA	1	0.392	1047	1047
nadB	1	0.373	1650	1650
nadC	1	0.293	888	888
nadD	1	0.39	654	654
nadE	1	0.327	855	855
nadK	1	0.351	906	906
ndk	1	0.336	435	435
nfo	1	0.344	879	879
nlpC	1	0.298	588	588
nrdA	1	0.364	2283	2283
nrdB	1	0.331	1131	1131
nuc	1	0.26	534	534
nudE	1	0.337	546	546
nudH	1	0.356	480	480
nuoA	1	0.339	387	387
nuoB	1	0.372	675	675
nuoC	1	0.368	1788	1788
nuoE	1	0.329	504	504
nuoF	1	0.39	1335	1335
nuoG	1	0.376	2739	2730
nuoH	1	0.361	966	966
nuoI	1	0.372	543	543
nuoJ	1	0.313	498	498
nuoK	1	0.347	303	303
nuoL	1	0.329	1866	1866
nuoM	1	0.348	1524	1524
nuoN	1	0.319	1455	1455
nusA	1	0.365	1488	1488
nusB	1	0.395	420	420
nusG	1	0.374	546	546
obgE	0.999	0.331	1011	1011
omp85a	1	0.278	2382	2382
omp85b	0.999	0.332	1776	1776
ompH	1	0.339	498	498
orn	1	0.333	555	555
oxaA	1	0.277	1602	1602
pabA	1	0.377	591	591
pabB	1	0.352	1359	1359
pabC	1	0.35	804	804
pal	1	0.318	636	636
panB	1	0.382	798	798
panC	1	0.35	858	858
panE	1	0.297	870	870
pckA	1	0.339	1617	1617
pcnB	0.999	0.344	1389	1389
pdxA	1	0.381	1005	1005
pdxB	0.999	0.344	1131	1131
pdxH	1	0.387	651	651
pdxJ	1	0.393	732	732
pepA	1	0.365	1503	1503
pfkA	1	0.407	963	963
pfs	1	0.351	690	690
pgi	1	0.316	1662	1662
pgk	1	0.328	1164	1164
pgl	1	0.353	882	882
pgpA	1	0.333	507	507
pgsA	1	0.358	564	564
pheS	1	0.324	984	984
pheT	1	0.308	2385	2385
pitA	1	0.363	1575	1575
plsB	1	0.327	2466	2466
plsC	1	0.321	750	750
pnp	1	0.348	2094	2094
polA	1	0.306	921	921
ppa	1	0.339	534	534
ppk	1	0.31	2088	2088
prfA	0.999	0.395	1101	1101
prfB	1	0.277	1012	1012
priA	1	0.374	2115	2115
priN	1	0.319	354	354
prlC	1	0.343	2088	2088
prmB	1	0.339	936	936
proS	1	0.359	1674	1674
prsA	1	0.367	939	939
psd	1	0.322	879	879
pssA	0.999	0.31	1362	1362
pta	1	0.332	2136	2136
pth	1	0.326	582	582
ptsH	1	0.38	258	258
ptsI	1	0.338	1716	1716
purA	1	0.393	1299	1299
purB	1	0.326	1392	1392
purC	1	0.307	714	714
purD	1	0.362	1275	1275
purE	0.998	0.374	510	510
purF	1	0.369	1419	1419
purH	1	0.349	1581	1581
purK	1	0.337	1074	1074
purL	1	0.361	3894	3894
purM	1	0.34	1077	1077
purN	1	0.355	660	660
pykA	0.999	0.362	1465	1464
pyrB	1	0.354	1026	994
pyrC	1	0.336	1095	1095
pyrD	1	0.354	1011	1011
pyrE	1	0.342	663	663
pyrF	1	0.359	750	750
pyrG	1	0.376	1632	1632
pyrH	1	0.293	750	750
pyrI	1	0.325	471	471
queA	1	0.367	1062	1062
queF	1	0.307	867	867
rbfA	1	0.304	405	405
recA	1	0.381	1116	1116
recB	1	0.326	3552	3552
recC	1	0.318	3297	3297
recD	1	0.338	1860	1860
recG	1	0.354	2100	2100
recJ	0.999	0.289	1728	1728
relA	0.999	0.335	890	890
rho	1	0.385	1260	1260
ribA	1	0.383	600	600
ribB	1	0.395	636	636
ribD	1	0.386	1155	1155
ribE	1	0.29	624	624
ribF	0.998	0.364	984	984
ribH	1	0.345	519	519
rimM	1	0.33	528	528
rlmB	1	0.371	747	747
rluC	1	0.346	969	969
rluD	0.999	0.37	960	960
rmuC	1	0.333	1485	1485
rnb	0.999	0.361	1938	1938
rnc	1	0.345	678	678
rne	1	0.363	1770	1770
rnfB	1	0.354	189	189
rnhA	1	0.333	462	462
rnpA	1	0.284	348	348
rnr	1	0.371	2250	2250
rnt	1	0.371	657	657
rp1F	1	0.326	534	534
rpe	1	0.361	696	696
rpiA	1	0.344	672	672
rplA	1	0.312	705	705
rplB	1	0.37	819	819
rplC	1	0.326	639	639
rplD	1	0.327	606	606
rplE	1	0.291	546	546
rplI	1	0.349	453	453
rplJ	1	0.339	501	501
rplK	1	0.34	429	429
rplL	1	0.325	366	366
rplM	1	0.333	429	429
rplN	1	0.317	483	483
rplO	1	0.375	432	432
rplP	1	0.384	414	414
rplQ	1	0.339	387	387
rplR	1	0.365	348	348
rplS	1	0.399	348	348
rplT	1	0.358	363	363
rplU	1	0.301	312	312
rplV	1	0.324	333	333
rplW	1	0.284	303	303
rplX	1	0.289	315	315
rplY	1	0.33	285	285
rpmA	1	0.357	255	255
rpmB	1	0.39	228	228
rpmC	1	0.292	192	192
rpmD	1	0.322	183	183
rpmE	1	0.326	279	279
rpmF	1	0.357	171	171
rpmG	1	0.321	168	168
rpmH	1	0.444	144	144
rpmI	1	0.343	198	198
rpmJ	1	0.342	117	117
rpoA	1	0.354	984	984
rpoB	1	0.354	4023	4023
rpoC	1	0.368	4227	4227
rpoD	0.999	0.364	1839	1839
rpoH	1	0.354	861	861
rpoZ	1	0.384	198	198
rpsA	0.999	0.369	1677	1677
rpsB	1	0.342	699	699
rpsC	1	0.375	702	702
rpsD	1	0.356	621	621
rpsE	1	0.355	504	504
rpsF	0.997	0.34	378	378
rpsG	1	0.363	471	471
rpsH	1	0.311	399	399
rpsI	0.997	0.402	399	399
rpsJ	1	0.359	312	312
rpsK	1	0.385	390	390
rpsL	1	0.395	375	375
rpsM	1	0.381	357	357
rpsN	1	0.366	306	306
rpsO	1	0.33	306	306
rpsP	1	0.375	267	267
rpsQ	1	0.267	270	270
rpsR	1	0.39	228	228
rpsS	1	0.351	279	279
rpsT	1	0.348	264	264
rpsU	1	0.363	270	270
rrmJ	1	0.33	630	630
ruvA	1	0.325	591	591
ruvB	1	0.356	1008	1008
ruvC	1	0.333	522	522
secA	0.999	0.309	2637	2637
secD	0.999	0.322	1839	1839
secE	1	0.271	384	384
secF	1	0.318	921	921
secG	1	0.283	279	279
secY	1	0.313	1335	1335
serC	1	0.364	1092	1092
serS	1	0.302	1293	1293
slyA	1	0.379	435	435
smpA	1	0.273	333	333
smpB	1	0.34	486	486
sodA	1	0.296	624	624
spb	1	0.375	990	990
sppA	1	0.304	1857	1857
sRNA	1	0.408	375	375
ssb	1	0.382	498	498
sucC	1	0.327	1182	1182
sucD	0.999	0.359	885	885
sufA	1	0.328	360	360
sufB	1	0.34	1476	1476
sufC	1	0.316	741	741
sufD	1	0.325	1299	1299
sufE	1	0.287	435	435
sufS	0.999	0.356	1224	1224
suhB	1	0.318	807	807
surA	1	0.322	1302	1302
tadA	1	0.338	477	441
talB	1	0.33	954	954
terC	1	0.279	1335	1335
tgt	0.999	0.345	1113	1113
thiC	1	0.379	1899	1869
thiD	1	0.341	804	804
thiE	1	0.36	645	645
thiF	1	0.375	774	774
thiG	1	0.401	780	780
thiH	1	0.362	1149	1149
thiI	1	0.283	297	297
thiL	0.999	0.359	978	978
thiS	1	0.343	201	201
thrS	0.999	0.322	1929	1929
thyA	1	0.361	795	795
tig	1	0.299	1311	1311
tilS	1	0.342	1461	1461
tktA	0.999	0.372	1998	1998
tmk	1	0.344	639	639
tolB	0.997	0.322	1301	1301
topA	1	0.33	2574	2574
tpiA	1	0.364	771	771
trmD	1	0.391	759	759
trmE	0.999	0.321	1374	1374
trmU	1	0.338	1107	1107
troB	1	0.337	843	843
trpS	1	0.335	1017	1017
truA	1	0.373	804	804
truB	0.999	0.341	954	954
trxA	1	0.33	327	327
trxB	1	0.324	960	960
tsf	1	0.311	846	843
tuf	1	0.358	1185	1185
tyrS	1	0.32	1275	1275
ubiB	1	0.332	720	720
ung	0.999	0.352	669	669
uppP	1	0.295	828	828
uppS	1	0.339	762	762
uvrD	1	0.315	1941	1941
valS	1	0.354	2874	2874
yafD	1	0.313	837	837
yajC	1	0.297	333	333
yajR	1	0.317	1410	1410
ybbK	1	0.34	903	903
ybeY	1	0.316	468	468
ybgF	1	0.319	648	648
ybgI	1	0.353	747	747
ycdX	1	0.329	735	735
yceA	1	0.301	975	975
ycfH	1	0.317	801	801
ychF	1	0.306	1071	1071
yclI	1	0.304	303	303
ydbK	1	0.365	3492	3492
yeaZ	1	0.358	699	699
yecC	1	0.362	801	801
yecS	1	0.37	657	657
yfaE	1	0.33	267	267
yfgL	1	0.313	1134	1134
ygcM	1	0.356	390	390
ygfA	1	0.296	609	609
yggW	1	0.303	1158	1158
yhgI	1	0.284	573	573
yibN	1	0.317	432	432
yicC	1	0.379	867	867
yicCa	1	0.286	765	765
yidD	1	0.318	258	258
yifE	1	0.372	339	339
yigB	1	0.368	717	717
yjcE	1	0.352	1659	1659
yjgF	1	0.331	396	396
yodO	1	0.333	1020	1020
zipA	1	0.327	810	810
znuC	1	0.333	855	855
zur	1	0.342	444	444
zwf	1	0.328	1479	1479
AVG.	0.999794

## Sheet: Yellow vs. B-GWSS
Gene Name	Yellow Bacteriome vs. B-GWSS CP000238
	% Pairwise Identity	%GC	Max Sequence Length	Min Sequence Length	CDS Length Diff.
accA	0.998	0.375	960	960	0
accB	1	0.36	453	453	0
accC	1	0.361	1350	1350	0
accD	1	0.398	888	888	0
aceE	1	0.316	2670	2670	0
aceF	1	0.267	1290	1290	0
ackA	1	0.351	1203	1203	0
acpP	1	0.363	234	234	0
acpS	0.998	0.375	441	441	0
adk	1	0.335	642	642	0
ahpC	1	0.355	603	603	0
alaS	1	0.377	2655	2655	0
amiB	1	0.311	1218	1218	0
apaH	1	0.366	867	867	0
argS	1	0.344	1737	1737	0
aroA	1	0.352	1287	1287	0
aroB	1	0.344	1080	1080	0
aroC	1	0.37	1068	1068	0
aroE	1	0.316	765	765	0
aroH	1	0.378	996	996	0
aroK	1	0.385	522	522	0
aroQ	1	0.349	504	504	0
artI	1	0.233	729	729	0
artM	0.997	0.253	672	672	0
artP	1	0.302	729	729	0
artQ	1	0.268	705	696	9
asnS	1	0.348	1404	1404	0
aspA	1	0.359	1419	1419	0
aspC	0.999	0.332	1191	1191	0
aspS	1	0.324	1770	1770	0
atpA	1	0.314	1542	1542	0
atpB	0.999	0.256	822	822	0
atpC	1	0.3	423	423	0
atpD	1	0.364	1374	1374	0
atpE	1	0.325	243	243	0
atpF	1	0.261	471	471	0
atpG	1	0.282	864	864	0
atpH	1	0.283	534	534	0
bioA	0.999	0.391	1302	1302	0
bioB	0.999	0.357	1029	1029	0
bioC	1	0.373	762	762	0
bioD	1	0.388	678	678	0
bioF	1	0.377	1179	1179	0
bioH	1	0.285	762	762	0
birA	0.999	0.286	849	849	0
bolA	1	0.295	258	258	0
carA	0.999	0.362	1161	1146	15
carB	1	0.364	3240	3240	0
cca	1	0.395	1239	1239	0
cdsA	0.999	0.33	855	855	0
clpB	1	0.375	2721	2721	0
clpP	1	0.362	618	618	0
clpX	1	0.34	1266	1266	0
cls	0.999	0.34	1452	1452	0
cmk	1	0.379	678	678	0
coaA	1	0.286	939	939	0
coaD	1	0.362	492	492	0
coaE	1	0.286	612	612	0
corA	0.999	0.342	951	951	0
crp	1	0.344	633	633	0
cspE	1	0.359	270	270	0
csrA	1	0.409	186	186	0
cvpA	1	0.307	486	486	0
cyaA	0.999	0.275	1200	1200	0
cyoA	1	0.306	915	915	0
cyoB	1	0.357	1998	1998	0
cyoC	1	0.307	612	612	0
cyoE	0.999	0.29	867	867	0
cysA	1	0.354	1134	1134	0
cysB	1	0.379	975	975	0
cysC	1	0.391	624	624	0
cysD	1	0.389	909	909	0
cysE	1	0.415	816	816	0
cysG	1	0.406	1389	1389	0
cysH	0.997	0.382	738	738	0
cysI	1	0.385	1701	1701	0
cysJ	1	0.379	1788	1788	0
cysK	1	0.387	966	966	0
cysN	1	0.382	1443	1443	0
cysQ	1	0.37	744	744	0
cysS	1	0.335	1389	1389	0
cysT	0.998	0.357	831	831	0
cysW	1	0.346	843	843	0
dacB	1	0.327	1428	1428	0
dapF	1	0.356	825	825	0
dcd	1	0.371	582	582	0
ddlA	1	0.336	1128	1128	0
deaD	0.999	0.383	1791	1791	0
dedA	0.998	0.317	651	651	0
def	1	0.31	504	504	0
degQ	0.999	0.357	1383	1383	0
dfp	1	0.39	1215	1215	0
dksA	1	0.364	456	456	0
dnaB	1	0.373	1413	1413	0
dnaE	1	0.334	3492	3492	0
dnaG	0.999	0.336	1788	1788	0
dnaJ	1	0.393	1119	1119	0
dnaK	1	0.374	1896	1896	0
dnaN	1	0.299	1113	1113	0
dnaQ	1	0.259	723	723	0
dnaX	0.999	0.336	1155	1155	0
dsbA	1	0.293	672	672	0
dsrE	1	0.32	372	372	0
dsrF	1	0.289	360	360	0
dsrH	1	0.313	288	288	0
dsvC	0.998	0.3	492	492	0
dut	1	0.375	453	453	0
dxr	0.999	0.368	1197	1197	0
dxs	1	0.384	1902	1902	0
ecfE	1	0.308	1380	1380	0
efp	1	0.328	570	570	0
emrA	1	0.32	1212	1212	0
emrB	0.999	0.32	1518	1518	0
engA	1	0.315	1419	1419	0
engB	1	0.286	609	609	0
eno	1	0.364	1302	1302	0
era	1	0.339	906	906	0
exsB	1	0.35	717	717	0
fabA	1	0.375	522	522	0
fabB	1	0.368	1221	1221	0
fabD	1	0.371	963	963	0
fabG	1	0.365	735	735	0
fabH	1	0.378	954	954	0
fabI	1	0.366	789	789	0
fabZ	1	0.371	450	450	0
fbaA	1	0.305	1077	1077	0
ffh	1	0.353	1350	1350	0
fldA	1	0.33	531	531	0
fliY	1	0.342	783	783	0
fmt	1	0.356	936	936	0
folA	1	0.325	498	498	0
folB	1	0.331	366	366	0
folC	1	0.359	1281	1281	0
folD	1	0.366	858	858	0
folE	1	0.341	663	663	0
folK	1	0.361	504	504	0
folP	1	0.354	867	867	0
frr	1	0.317	558	558	0
ftn	0.998	0.267	489	489	0
ftsE	1	0.315	642	642	0
ftsH	1	0.36	1884	1884	0
ftsK	0.967	0.259	2028	1961	67
ftsX	0.999	0.308	951	951	0
ftsY	1	0.322	1065	1065	0
ftsZ	1	0.35	1173	1173	0
fumC	0.999	0.348	1392	1392	0
fusA	1	0.358	2118	2118	0
gapA	1	0.349	1071	1071	0
gcp	1	0.411	1026	1026	0
gcvT	0.999	0.25	978	978	0
genea	1	0.35	759	759	0
genX	1	0.321	984	984	0
gidA	0.998	0.301	1896	1896	0
glmM	1	0.36	1338	1338	0
glmS	1	0.313	1839	1839	0
glmU	1	0.299	1410	1410	0
glnS	1	0.326	1671	1671	0
globa	1	0.293	774	774	0
gloB	1	0.34	630	630	0
gltP	0.999	0.318	1349	1347	2
gltX	1	0.323	1401	1401	0
gluta	1	0.314	360	360	0
glyA	1	0.353	1254	1254	0
glyQ	0.999	0.369	909	909	0
glyS	1	0.32	2100	2100	0
gmk	1	0.337	615	615	0
gnd	1	0.353	1407	1407	0
gpmA	1	0.338	714	714	0
gpsA	1	0.407	1023	1023	0
greA	1	0.34	477	477	0
groEL	0.999	0.393	1641	1641	0
groES	1	0.418	294	294	0
grpE	1	0.365	597	597	0
gshA	0.999	0.363	1572	1572	0
gshB	1	0.327	954	954	0
guaA	1	0.324	1581	1581	0
guaB	1	0.373	1458	1458	0
gyrA	1	0.368	2544	2337	207
gyrB	1	0.32	2409	2409	0
hemC	1	0.402	936	936	0
hemD	1	0.381	741	741	0
hemK	1	0.381	846	846	0
hesB	1	0.313	348	348	0
hflC	1	0.386	1002	1002	0
hflK	0.999	0.391	1161	1161	0
hflX	1	0.35	1284	1284	0
hfq	1	0.318	261	261	0
hisA	1	0.388	747	747	0
hisB	1	0.342	1071	1071	0
hisC	1	0.361	1083	1083	0
hisD	1	0.38	1314	1314	0
hisF	1	0.367	777	777	0
hisG	1	0.367	900	900	0
hisH	1	0.372	594	594	0
hisI	1	0.337	624	624	0
hisS	1	0.333	1293	1293	0
hit	0.997	0.316	366	366	0
hns	1	0.324	411	354	57
holA	1	0.33	1038	1038	0
holB	0.999	0.315	999	999	0
holC	1	0.329	465	465	0
holD	1	0.36	408	408	0
hslU	1	0.389	1341	1341	0
hslV	1	0.396	543	543	0
hspQ	1	0.381	318	318	0
htpG	1	0.312	1896	1896	0
htpX	1	0.332	876	876	0
hup	1	0.351	285	285	0
hyp14	1	0.321	408	408	0
hyp15	1	0.341	696	696	0
hyp16	1	0.254	126	126	0
hyp17	1	0.351	672	672	0
hyp18	1	0.327	165	165	0
hyp1	1	0.27	315	315	0
hyp22	1	0.259	495	495	0
hyp23	1	0.367	597	597	0
hyp24a	0.999	0.303	534	534	0
hyp24	0.999	0.335	948	948	0
hyp25	0.99	0.191	102	102	0
hyp26a	1	0.252	234	234	0
hyp26	1	0.344	564	564	0
hyp27	0.998	0.337	447	408	39
hyp28	1	0.264	522	522	0
hyp29	1	0.279	330	330	0
hyp2	1	0.33	267	267	0
hyp30	1	0.304	2949	2949	0
hyp8	1	0.354	339	339	0
hyp9	1	0.29	1008	1008	0
hypA	1	0.271	96	96	0
hypo1	0.997	0.246	348	348	0
hypoz	1	0.232	99	99	0
ibpA	1	0.327	480	480	0
ileS	1	0.357	2817	2817	0
infA	1	0.329	219	219	0
infB	1	0.346	2643	2643	0
infC	0.998	0.334	516	516	0
iscS	0.999	0.36	1155	1155	0
ispA	1	0.346	915	915	0
ispD	1	0.39	726	726	0
ispE	0.999	0.361	876	876	0
ispF	1	0.375	477	477	0
ispG	1	0.347	1122	1122	0
ispH	0.999	0.367	942	942	0
ksgA	0.999	0.354	816	816	0
lepA	1	0.349	1809	1809	0
lepB	1	0.327	936	936	0
leuS	1	0.362	2586	2586	0
lgt	1	0.332	858	858	0
ligA	1	0.338	2016	2016	0
lipA	1	0.365	885	885	0
lipB	1	0.355	684	684	0
lnt	1	0.343	1521	1521	0
lolA	1	0.228	627	627	0
lolB	1	0.299	648	648	0
lolC	1	0.336	1194	1194	0
lolD	1	0.357	711	711	0
lolE	0.999	0.342	1248	1248	0
lona	1	0.37	2355	2355	0
lon	1	0.33	1755	1755	0
lpdA	1	0.289	1413	1413	0
lppA	1	0.328	345	345	0
lspA	0.998	0.303	504	504	0
lysP	1	0.346	1479	1479	0
lysS	1	0.271	1521	1521	0
m23F	0.998	0.358	1218	1218	0
manX	1	0.329	969	969	0
manY	1	0.35	801	801	0
manZ	1	0.354	840	840	0
map	1	0.342	795	795	0
marC	1	0.341	636	636	0
marR	1	0.319	426	426	0
mdtH	1	0.384	1302	1302	0
metA	0.999	0.309	921	921	0
metB	1	0.396	1164	1164	0
metC	0.998	0.361	1191	1191	0
metE	1	0.368	2295	2295	0
metF	1	0.347	909	909	0
metG	1	0.335	1644	1644	0
metJ	1	0.359	287	287	0
metK	0.999	0.384	1158	1158	0
metR	1	0.377	909	909	0
miaA	1	0.355	930	930	0
miaB	1	0.355	1356	1356	0
minC	1	0.33	696	696	0
minD	0.999	0.343	813	813	0
minE	1	0.305	282	282	0
mltC	0.999	0.29	1023	1023	0
mntH	1	0.32	1350	1350	0
mqo	0.999	0.316	1524	1524	0
mraW	1	0.336	954	954	0
mraY	1	0.317	1083	1083	0
mrdA	1	0.339	1866	1866	0
mrdB	0.999	0.329	1092	1092	0
mreB	1	0.42	1044	1044	0
mreC	1	0.311	867	867	0
mreD	1	0.247	477	477	0
murA	1	0.377	1257	1257	0
murB	1	0.309	1029	1029	0
murC	0.999	0.319	1473	1473	0
murD	1	0.309	1341	1341	0
murE	0.999	0.335	1488	1488	0
murF	1	0.327	1362	1362	0
murG	1	0.349	1077	1077	0
murI	0.999	0.229	825	744	81
mutH	1	0.369	675	675	0
mutL	1	0.347	1809	1809	0
mutM	1	0.383	810	810	0
mutS	1	0.386	2568	2568	0
mviN	1	0.359	1527	1527	0
nadA	1	0.392	1047	1047	0
nadB	1	0.373	1650	1650	0
nadC	1	0.293	888	888	0
nadD	1	0.39	654	654	0
nadE	1	0.327	855	855	0
nadK	1	0.351	906	906	0
ndk	1	0.336	435	435	0
nfo	1	0.344	879	879	0
nlpC	1	0.298	588	588	0
nrdA	1	0.364	2283	2283	0
nrdB	1	0.331	1131	1131	0
nuc	1	0.26	534	534	0
nudE	1	0.337	546	546	0
nudH	1	0.356	480	480	0
nuoA	1	0.339	387	387	0
nuoB	1	0.372	675	675	0
nuoC	1	0.368	1788	1788	0
nuoE	1	0.329	504	504	0
nuoF	1	0.39	1335	1335	0
nuoG	1	0.376	2730	2730	0
nuoH	1	0.361	966	966	0
nuoI	1	0.372	543	543	0
nuoJ	1	0.313	498	498	0
nuoK	1	0.347	303	303	0
nuoL	1	0.329	1866	1866	0
nuoM	1	0.348	1524	1524	0
nuoN	1	0.319	1455	1455	0
nusA	1	0.365	1488	1488	0
nusB	1	0.395	420	420	0
nusG	1	0.374	546	546	0
obgE	0.999	0.331	1011	1011	0
omp85a	1	0.278	2382	2382	0
omp85b	0.999	0.332	1776	1776	0
ompH	1	0.339	498	498	0
orn	1	0.333	555	555	0
oxaA	1	0.277	1602	1602	0
pabA	1	0.377	591	591	0
pabB	1	0.352	1359	1359	0
pabC	1	0.35	804	804	0
pal	1	0.318	636	636	0
panB	1	0.382	798	798	0
panC	1	0.35	858	858	0
panE	1	0.297	870	870	0
pckA	1	0.339	1617	1617	0
pcnB	0.999	0.344	1389	1389	0
pdxA	1	0.381	1005	1005	0
pdxB	0.999	0.344	1131	1131	0
pdxH	1	0.387	651	651	0
pdxJ	1	0.393	732	732	0
pepA	1	0.365	1503	1503	0
pfkA	1	0.407	963	963	0
pfs	1	0.351	690	690	0
pgi	1	0.316	1662	1662	0
pgk	1	0.328	1164	1164	0
pgl	1	0.353	882	882	0
pgpA	1	0.333	507	507	0
pgsA	1	0.358	564	564	0
pheS	1	0.324	984	984	0
pheT	1	0.308	2385	2385	0
pitA	1	0.363	1575	1575	0
plsB	1	0.327	2466	2466	0
plsC	1	0.321	750	750	0
pnp	1	0.348	2094	2094	0
polA	1	0.306	921	921	0
ppa	1	0.339	534	534	0
ppk	1	0.31	2088	2088	0
prfA	0.999	0.395	1101	1101	0
prfB	1	0.277	1012	1012	0
priA	1	0.374	2115	2115	0
priN	1	0.319	354	354	0
prlC	1	0.343	2088	2088	0
prmB	1	0.339	936	936	0
proS	1	0.359	1674	1674	0
prsA	1	0.367	939	939	0
psd	1	0.322	879	879	0
pssA	0.999	0.31	1362	1362	0
pta	1	0.332	2136	2136	0
pth	1	0.326	582	582	0
ptsH	1	0.38	258	258	0
ptsI	1	0.338	1716	1716	0
purA	1	0.393	1299	1299	0
purB	1	0.326	1392	1392	0
purC	1	0.307	714	714	0
purD	1	0.362	1275	1275	0
purE	0.998	0.374	510	510	0
purF	1	0.369	1419	1419	0
purH	1	0.349	1581	1581	0
purK	1	0.337	1074	1074	0
purL	1	0.361	3894	3894	0
purM	0.966	0.34	1077	957	120
purN	1	0.355	660	660	0
pykA	0.999	0.362	1464	1464	0
pyrB	1	0.354	1026	1026	0
pyrC	1	0.336	1095	1095	0
pyrD	1	0.354	1011	1011	0
pyrE	1	0.342	663	663	0
pyrF	1	0.359	750	750	0
pyrG	1	0.376	1632	1632	0
pyrH	1	0.293	750	750	0
pyrI	1	0.325	471	471	0
queA	1	0.367	1062	1062	0
queF	1	0.307	867	867	0
rbfA	1	0.304	405	405	0
recA	1	0.381	1116	1116	0
recB	1	0.326	3552	3552	0
recC	1	0.318	3297	3297	0
recD	1	0.338	1860	1860	0
recG	1	0.354	2100	2100	0
recJ	0.999	0.289	1728	1728	0
relA	0.999	0.335	890	890	0
rho	1	0.385	1260	1260	0
ribA	1	0.383	600	600	0
ribB	1	0.395	636	636	0
ribD	1	0.386	1155	1155	0
ribE	1	0.29	624	624	0
ribF	0.998	0.364	984	984	0
ribH	1	0.345	519	519	0
rimM	1	0.33	528	528	0
rlmB	1	0.371	747	747	0
rluC	1	0.346	969	969	0
rluD	0.999	0.37	960	960	0
rmuC	1	0.333	1485	1485	0
rnb	0.999	0.361	1938	1938	0
rnc	1	0.345	678	678	0
rne	1	0.363	1770	1770	0
rnfB	1	0.354	189	189	0
rnhA	1	0.333	462	462	0
rnpA	1	0.284	348	348	0
rnr	1	0.371	2250	2250	0
rnt	1	0.371	657	657	0
rp1F	1	0.326	534	534	0
rpe	1	0.361	696	696	0
rpiA	1	0.344	672	672	0
rplA	1	0.312	705	705	0
rplB	1	0.37	819	819	0
rplC	1	0.325	699	639	60
rplD	1	0.327	606	606	0
rplE	1	0.291	546	546	0
rplI	1	0.349	453	453	0
rplJ	1	0.339	501	501	0
rplK	1	0.34	429	429	0
rplL	1	0.325	366	366	0
rplM	1	0.333	429	429	0
rplN	1	0.317	483	483	0
rplO	1	0.375	432	432	0
rplP	1	0.384	414	414	0
rplQ	1	0.339	387	387	0
rplR	1	0.365	348	348	0
rplS	1	0.399	348	348	0
rplT	1	0.358	363	363	0
rplU	1	0.301	312	312	0
rplV	1	0.324	333	333	0
rplW	1	0.284	303	303	0
rplX	1	0.289	315	315	0
rplY	1	0.33	285	285	0
rpmA	1	0.357	255	255	0
rpmB	1	0.39	228	228	0
rpmC	1	0.292	192	192	0
rpmD	1	0.322	183	183	0
rpmE	1	0.326	279	279	0
rpmF	1	0.357	171	171	0
rpmG	1	0.321	168	168	0
rpmH	1	0.444	144	144	0
rpmI	1	0.343	198	198	0
rpmJ	1	0.342	117	117	0
rpoA	1	0.354	984	984	0
rpoB	1	0.354	4023	4023	0
rpoC	1	0.368	4227	4227	0
rpoD	0.999	0.364	1839	1839	0
rpoH	1	0.354	861	861	0
rpoZ	1	0.384	198	198	0
rpsA	0.999	0.369	1677	1677	0
rpsB	1	0.342	699	699	0
rpsC	1	0.375	702	702	0
rpsD	1	0.356	621	621	0
rpsE	1	0.355	504	504	0
rpsF	0.997	0.34	378	378	0
rpsG	1	0.363	471	471	0
rpsH	1	0.311	399	399	0
rpsI	0.997	0.402	399	399	0
rpsJ	1	0.359	312	312	0
rpsK	1	0.385	390	390	0
rpsL	1	0.395	375	375	0
rpsM	1	0.381	357	357	0
rpsN	1	0.366	306	306	0
rpsO	1	0.33	306	306	0
rpsP	1	0.375	267	267	0
rpsQ	1	0.267	270	270	0
rpsR	1	0.39	228	228	0
rpsS	1	0.351	279	279	0
rpsT	1	0.348	264	264	0
rpsU	1	0.363	270	270	0
rrmJ	1	0.33	630	630	0
ruvA	1	0.325	591	591	0
ruvB	1	0.356	1008	1008	0
ruvC	1	0.333	522	522	0
secA	0.999	0.309	2637	2637	0
secD	0.999	0.322	1839	1839	0
secE	1	0.271	384	384	0
secF	1	0.318	921	921	0
secG	1	0.283	279	279	0
secY	1	0.313	1335	1335	0
serC	1	0.364	1092	1092	0
serS	1	0.302	1293	1293	0
slyA	1	0.379	435	435	0
smpA	1	0.273	333	333	0
smpB	1	0.34	486	486	0
sodA	1	0.296	624	624	0
spb	1	0.375	990	990	0
sppA	1	0.304	1857	1857	0
sRNA	1	0.408	375	375	0
ssb	1	0.382	498	498	0
sucC	1	0.327	1182	1182	0
sucD	1	0.358	885	885	0
sufA	1	0.328	360	360	0
sufB	1	0.34	1476	1476	0
sufC	1	0.316	741	741	0
sufD	1	0.325	1299	1299	0
sufE	1	0.287	435	435	0
sufS	0.999	0.356	1224	1224	0
suhB	1	0.318	807	807	0
surA	1	0.322	1302	1302	0
tadA	1	0.338	477	441	36
talB	1	0.33	954	954	0
terC	1	0.279	1335	1335	0
tgt	0.999	0.345	1113	1113	0
thiC	1	0.378	1899	1899	0
thiD	1	0.341	804	804	0
thiE	1	0.36	645	645	0
thiF	1	0.375	774	774	0
thiG	1	0.401	780	780	0
thiH	1	0.362	1149	1149	0
thiI	1	0.283	297	297	0
thiL	0.999	0.359	978	978	0
thiS	1	0.343	201	201	0
thrS	0.999	0.322	1929	1929	0
thyA	1	0.361	795	795	0
tig	1	0.299	1311	1311	0
tilS	1	0.342	1461	1461	0
tktA	0.999	0.372	1998	1998	0
tmk	1	0.344	639	639	0
tolB	0.997	0.322	1301	1301	0
topA	1	0.33	2574	2574	0
tpiA	1	0.364	771	771	0
trmD	1	0.391	759	759	0
trmE	0.999	0.321	1374	1374	0
trmU	1	0.34	1107	999	108
troB	1	0.337	843	843	0
trpS	1	0.335	1017	1017	0
truA	1	0.373	804	804	0
truB	0.999	0.341	954	954	0
trxA	1	0.33	327	327	0
trxB	1	0.324	960	960	0
tsf	1	0.311	843	843	0
tuf	1	0.358	1185	1185	0
tyrS	1	0.32	1275	1275	0
ubiB	1	0.332	720	720	0
ung	0.999	0.352	669	669	0
uppP	1	0.295	828	828	0
uppS	1	0.339	762	762	0
uvrD	1	0.315	1941	1941	0
valS	1	0.354	2874	2874	0
yafD	1	0.313	837	837	0
yajC	1	0.297	333	333	0
yajR	1	0.317	1410	1410	0
ybbK	1	0.34	903	903	0
ybeY	1	0.316	468	468	0
ybgF	1	0.319	648	648	0
ybgI	1	0.353	747	747	0
ycdX	1	0.329	735	735	0
yceA	1	0.301	975	975	0
ycfH	1	0.317	801	801	0
ychF	1	0.306	1071	1071	0
yclI	1	0.304	303	303	0
ydbK	1	0.365	3492	3492	0
yeaZ	1	0.358	699	699	0
yecC	1	0.362	801	801	0
yecS	1	0.37	657	657	0
yfaE	1	0.33	267	267	0
yfgL	1	0.313	1134	1134	0
ygcM	1	0.356	390	390	0
ygfA	1	0.296	609	609	0
yggW	1	0.303	1158	1158	0
yhgI	1	0.284	573	573	0
yibN	1	0.317	432	432	0
yicC	1	0.379	867	867	0
yicCa	1	0.286	765	765	0
yidD	1	0.318	258	258	0
yifE	1	0.372	339	339	0
yigB	1	0.368	717	717	0
yjcE	1	0.352	1659	1659	0
yjgF	1	0.331	396	396	0
yodO	1	0.333	1020	1020	0
zipA	1	0.327	810	810	0
znuC	1	0.333	855	855	0
zur	1	0.342	444	444	0
zwf	1	0.328	1479	1479	0
AVG.	0.999685

## Sheet: Red vs. Yellow
Gene Name	Red Bacteriome vs. Yellow Bacteriome
	% Pairwise Identity	%GC	Max Sequence Length	Min Sequence Length	CDS Length Diff.
accA	1	0.374	960	960	0
accB	1	0.36	453	453	0
accC	1	0.361	1350	1350	0
accD	1	0.398	888	888	0
aceE	1	0.316	2670	2670	0
aceF	1	0.267	1290	1290	0
ackA	1	0.351	1203	1203	0
acpP	1	0.363	234	234	0
acpS	1	0.374	441	441	0
adk	1	0.335	642	642	0
ahpC	1	0.355	603	603	0
alaS	1	0.377	2655	2655	0
amiB	1	0.311	1218	1218	0
apaH	1	0.366	867	867	0
argS	1	0.344	1737	1737	0
aroA	1	0.352	1287	1287	0
aroB	1	0.344	1080	1080	0
aroC	1	0.37	1068	1068	0
aroE	1	0.316	765	765	0
aroH	1	0.378	996	996	0
aroK	1	0.385	522	522	0
aroQ	1	0.349	504	504	0
artI	1	0.233	729	729	0
artM	1	0.253	672	672	0
artP	1	0.302	729	729	0
artQ	1	0.268	705	696	9
asnS	1	0.348	1404	1404	0
aspA	1	0.359	1419	1419	0
aspC	1	0.332	1191	1191	0
aspS	1	0.324	1770	1770	0
atpA	1	0.314	1542	1542	0
atpB	1	0.255	822	822	0
atpC	1	0.3	423	423	0
atpD	1	0.364	1374	1374	0
atpE	1	0.325	243	243	0
atpF	1	0.261	471	471	0
atpG	1	0.282	864	864	0
atpH	1	0.283	534	534	0
bioA	1	0.391	1302	1302	0
bioB	1	0.358	1029	1029	0
bioC	1	0.373	762	762	0
bioD	1	0.389	678	678	0
bioF	1	0.377	1179	1179	0
bioH	1	0.285	762	762	0
birA	1	0.286	849	849	0
bolA	1	0.295	258	258	0
carA	1	0.363	1161	1161	0
carB	1	0.364	3240	3240	0
cca	1	0.395	1239	1239	0
cdsA	1	0.33	855	855	0
clpB	1	0.375	2721	2721	0
clpP	1	0.362	618	618	0
clpX	1	0.34	1266	1266	0
cls	1	0.34	1452	1452	0
cmk	1	0.379	678	678	0
coaA	1	0.286	939	939	0
coaD	1	0.362	492	492	0
coaE	1	0.286	612	612	0
corA	1	0.343	951	951	0
crp	1	0.344	633	633	0
cspE	1	0.359	270	270	0
csrA	1	0.409	186	186	0
cvpA	1	0.307	486	486	0
cyaA	1	0.274	1200	1200	0
cyoA	1	0.306	915	915	0
cyoB	1	0.357	1998	1998	0
cyoC	1	0.307	612	612	0
cyoE	1	0.29	867	867	0
cysA	1	0.354	1134	1134	0
cysB	1	0.379	975	975	0
cysC	1	0.391	624	624	0
cysD	1	0.389	909	909	0
cysE	1	0.415	816	816	0
cysG	1	0.406	1389	1389	0
cysH	1	0.383	738	738	0
cysI	1	0.385	1701	1701	0
cysJ	1	0.379	1788	1788	0
cysK	1	0.387	966	966	0
cysN	1	0.382	1443	1443	0
cysQ	1	0.37	744	744	0
cysS	1	0.335	1389	1389	0
cysT	0.999	0.358	831	831	0
cysW	1	0.346	843	843	0
dacB	1	0.327	1428	1428	0
dapF	1	0.356	825	825	0
dcd	1	0.371	582	582	0
ddlA	1	0.336	1128	1128	0
deaD	1	0.382	1791	1791	0
dedA	1	0.318	651	651	0
def	1	0.31	504	504	0
degQ	1	0.356	1383	1383	0
dfp	1	0.39	1215	1215	0
dksA	1	0.364	456	456	0
dnaB	1	0.373	1413	1413	0
dnaE	1	0.334	3492	3492	0
dnaG	1	0.336	1788	1788	0
dnaJ	1	0.393	1119	1119	0
dnaK	1	0.374	1896	1896	0
dnaN	1	0.299	1113	1113	0
dnaQ	1	0.259	723	723	0
dnaX	1	0.336	1155	1155	0
dsbA	1	0.293	672	672	0
dsrE	1	0.32	372	372	0
dsrF	1	0.289	360	360	0
dsrH	1	0.313	288	288	0
dsvC	1	0.299	492	492	0
dut	1	0.375	453	453	0
dxr	1	0.368	1197	1197	0
dxs	1	0.384	1902	1902	0
ecfE	1	0.308	1380	1380	0
efp	1	0.328	570	570	0
emrA	1	0.32	1212	1212	0
emrB	1	0.32	1518	1518	0
engA	1	0.315	1419	1419	0
engB	1	0.286	609	609	0
eno	1	0.364	1302	1302	0
era	1	0.339	906	906	0
exsB	1	0.35	717	717	0
fabA	1	0.375	522	522	0
fabB	1	0.368	1221	1221	0
fabD	1	0.371	963	963	0
fabG	1	0.365	735	735	0
fabH	1	0.378	954	954	0
fabI	1	0.366	789	789	0
fabZ	1	0.371	450	450	0
fbaA	1	0.305	1077	1077	0
ffh	1	0.353	1350	1350	0
fldA	1	0.33	531	531	0
fliY	1	0.342	783	783	0
fmt	1	0.356	936	936	0
folA	1	0.325	498	498	0
folB	1	0.331	366	366	0
folC	1	0.359	1281	1281	0
folD	1	0.366	858	858	0
folE	1	0.341	663	663	0
folK	1	0.361	504	504	0
folP	1	0.354	867	867	0
frr	1	0.317	558	558	0
ftn	1	0.268	489	489	0
ftsE	1	0.315	642	642	0
ftsH	1	0.36	1884	1884	0
ftsK	1	0.262	1962	1962	0
ftsX	1	0.308	951	951	0
ftsY	1	0.322	1065	1065	0
ftsZ	1	0.35	1173	1173	0
fumC	1	0.349	1392	1362	30
fusA	1	0.358	2118	2118	0
gapA	1	0.349	1071	1071	0
gcp	1	0.411	1026	1026	0
gcvT	1	0.249	978	978	0
genea	1	0.35	759	759	0
genX	1	0.321	984	984	0
gidA	1	0.301	1896	1896	0
glmM	1	0.36	1338	1338	0
glmS	1	0.313	1839	1839	0
glmU	1	0.299	1410	1410	0
glnS	1	0.326	1671	1671	0
globa	1	0.293	774	774	0
gloB	1	0.34	630	630	0
gltP	1	0.318	1347	1347	0
gltX	1	0.323	1401	1401	0
gluta	1	0.314	360	360	0
glyA	1	0.353	1254	1254	0
glyQ	1	0.369	909	909	0
glyS	1	0.32	2100	2100	0
gmk	1	0.337	615	615	0
gnd	1	0.353	1407	1407	0
gpmA	1	0.338	714	714	0
gpsA	1	0.407	1023	1023	0
greA	1	0.34	477	477	0
groEL	1	0.394	1641	1641	0
groES	1	0.418	294	294	0
grpE	1	0.365	597	597	0
gshA	1	0.363	1572	1572	0
gshB	1	0.327	954	954	0
guaA	1	0.324	1581	1581	0
guaB	1	0.373	1458	1458	0
gyrA	1	0.368	2544	2337	207
gyrB	1	0.32	2409	2409	0
hemC	1	0.402	936	936	0
hemD	1	0.381	741	741	0
hemK	1	0.381	846	846	0
hesB	1	0.313	348	348	0
hflC	1	0.386	1002	1002	0
hflK	1	0.39	1161	1161	0
hflX	1	0.35	1284	1284	0
hfq	1	0.318	261	261	0
hisA	1	0.388	747	747	0
hisB	1	0.342	1071	1071	0
hisC	1	0.361	1083	1083	0
hisD	1	0.38	1314	1314	0
hisF	1	0.367	777	777	0
hisG	1	0.367	900	900	0
hisH	1	0.372	594	594	0
hisI	1	0.337	624	624	0
hisS	1	0.333	1293	1293	0
hit	1	0.314	366	366	0
hns	1	0.324	411	354	57
holA	1	0.33	1038	1038	0
holB	1	0.315	999	999	0
holC	1	0.329	465	465	0
holD	1	0.36	408	408	0
hslU	1	0.389	1341	1341	0
hslV	1	0.396	543	543	0
hspQ	1	0.381	318	318	0
htpG	1	0.312	1896	1896	0
htpX	1	0.332	876	876	0
hup	1	0.351	285	285	0
hyp14	1	0.321	408	408	0
hyp15	1	0.341	696	696	0
hyp16	1	0.254	126	126	0
hyp17	1	0.351	672	672	0
hyp18	1	0.327	165	165	0
hyp1	1	0.27	315	315	0
hyp22	1	0.259	495	495	0
hyp23	1	0.367	597	597	0
hyp24a	1	0.303	534	534	0
hyp24	1	0.335	948	948	0
hyp25	1	0.196	102	102	0
hyp26a	1	0.252	234	234	0
hyp26	1	0.344	564	564	0
hyp27	1	0.333	447	432	15
hyp28	1	0.264	522	522	0
hyp29	1	0.279	330	330	0
hyp2	1	0.33	267	267	0
hyp30	1	0.304	2949	2949	0
hyp8	1	0.354	339	339	0
hyp9	1	0.29	1008	1008	0
hypA	1	0.271	96	96	0
hypo1	1	0.247	348	348	0
hypoz	1	0.232	99	99	0
ibpA	1	0.327	480	480	0
ileS	1	0.356	2817	2817	0
infA	1	0.329	219	219	0
infB	1	0.346	2643	2643	0
infC	1	0.335	516	516	0
iscS	1	0.36	1155	1155	0
ispA	1	0.346	915	915	0
ispD	1	0.39	726	726	0
ispE	1	0.361	876	876	0
ispF	1	0.375	477	477	0
ispG	1	0.347	1122	1122	0
ispH	1	0.366	942	942	0
ksgA	1	0.353	816	816	0
lepA	1	0.349	1809	1809	0
lepB	1	0.327	936	936	0
leuS	1	0.362	2586	2586	0
lgt	1	0.332	858	858	0
ligA	1	0.338	2016	2016	0
lipA	1	0.365	885	885	0
lipB	1	0.355	684	684	0
lnt	1	0.343	1521	1521	0
lolA	1	0.228	627	627	0
lolB	1	0.299	648	648	0
lolC	1	0.337	1194	1194	0
lolD	1	0.357	711	711	0
lolE	1	0.342	1248	1248	0
lona	1	0.37	2355	2355	0
lon	1	0.33	1755	1755	0
lpdA	1	0.289	1413	1413	0
lppA	1	0.328	345	345	0
lspA	1	0.302	504	504	0
lysP	1	0.346	1479	1479	0
lysS	1	0.271	1521	1521	0
m23F	1	0.359	1218	1218	0
manX	1	0.329	969	969	0
manY	1	0.35	801	801	0
manZ	1	0.354	840	840	0
map	1	0.342	795	795	0
marC	1	0.341	636	636	0
marR	1	0.319	426	426	0
mdtH	1	0.384	1302	1302	0
metA	1	0.308	921	921	0
metB	1	0.396	1164	1164	0
metC	1	0.361	1191	1191	0
metE	1	0.368	2295	2295	0
metF	1	0.347	909	909	0
metG	1	0.335	1644	1644	0
metJ	1	0.359	287	287	0
metK	1	0.384	1158	1158	0
metR	1	0.377	909	909	0
miaA	1	0.355	930	930	0
miaB	1	0.355	1356	1356	0
minC	1	0.33	696	696	0
minD	1	0.343	813	813	0
minE	1	0.305	282	282	0
mltC	1	0.289	1023	1023	0
mntH	1	0.32	1350	1350	0
mqo	1	0.316	1524	1524	0
mraW	1	0.336	954	954	0
mraY	1	0.317	1083	1083	0
mrdA	1	0.339	1866	1866	0
mrdB	1	0.33	1092	1092	0
mreB	1	0.42	1044	1044	0
mreC	1	0.311	867	867	0
mreD	1	0.247	477	477	0
murA	1	0.377	1257	1257	0
murB	1	0.309	1029	1029	0
murC	1	0.319	1473	1473	0
murD	1	0.309	1341	1341	0
murE	1	0.335	1488	1488	0
murF	1	0.327	1362	1362	0
murG	1	0.349	1077	1077	0
murI	1	0.229	825	744	81
mutH	1	0.369	675	675	0
mutL	1	0.347	1809	1809	0
mutM	1	0.383	810	810	0
mutS	1	0.386	2568	2568	0
mviN	1	0.359	1527	1527	0
nadA	1	0.392	1047	1047	0
nadB	1	0.373	1650	1650	0
nadC	1	0.293	888	888	0
nadD	1	0.39	654	654	0
nadE	1	0.327	855	855	0
nadK	1	0.351	906	906	0
ndk	1	0.336	435	435	0
nfo	1	0.344	879	879	0
nlpC	1	0.298	588	588	0
nrdA	1	0.364	2283	2283	0
nrdB	1	0.332	1131	1131	0
nuc	1	0.26	534	534	0
nudE	1	0.337	546	546	0
nudH	1	0.356	480	480	0
nuoA	1	0.339	387	387	0
nuoB	1	0.372	675	675	0
nuoC	1	0.368	1788	1788	0
nuoE	1	0.329	504	504	0
nuoF	1	0.39	1335	1335	0
nuoG	1	0.376	2730	2730	0
nuoH	1	0.361	966	966	0
nuoI	1	0.372	543	543	0
nuoJ	1	0.313	498	498	0
nuoK	1	0.347	303	303	0
nuoL	1	0.329	1866	1866	0
nuoM	1	0.348	1524	1524	0
nuoN	1	0.319	1455	1455	0
nusA	1	0.365	1488	1488	0
nusB	1	0.395	420	420	0
nusG	1	0.374	546	546	0
obgE	1	0.33	1011	1011	0
omp85a	1	0.278	2382	2382	0
omp85b	1	0.332	1776	1776	0
ompH	1	0.339	498	498	0
orn	1	0.333	555	555	0
oxaA	1	0.277	1602	1602	0
pabA	1	0.377	591	591	0
pabB	1	0.352	1359	1359	0
pabC	1	0.35	804	804	0
pal	1	0.318	636	636	0
panB	1	0.382	798	798	0
panC	1	0.35	858	858	0
panE	1	0.297	870	870	0
pckA	1	0.339	1617	1617	0
pcnB	1	0.344	1389	1389	0
pdxA	1	0.381	1005	1005	0
pdxB	1	0.343	1131	1131	0
pdxH	1	0.387	651	651	0
pdxJ	1	0.393	732	732	0
pepA	1	0.365	1503	1503	0
pfkA	1	0.407	963	963	0
pfs	1	0.351	690	690	0
pgi	1	0.316	1662	1662	0
pgk	1	0.328	1164	1164	0
pgl	1	0.353	882	882	0
pgpA	1	0.333	507	507	0
pgsA	1	0.358	564	564	0
pheS	1	0.324	984	984	0
pheT	1	0.308	2385	2385	0
pitA	1	0.363	1575	1575	0
plsB	1	0.327	2466	2466	0
plsC	1	0.321	750	750	0
pnp	1	0.348	2094	2094	0
polA	1	0.306	921	921	0
ppa	1	0.339	534	534	0
ppk	1	0.31	2088	2088	0
prfA	1	0.394	1101	1101	0
prfB	1	0.277	1012	1012	0
priA	1	0.374	2115	2115	0
priN	1	0.319	354	354	0
prlC	1	0.342	2088	2088	0
prmB	1	0.339	936	936	0
proS	1	0.359	1674	1674	0
prsA	1	0.367	939	939	0
psd	1	0.322	879	879	0
pssA	1	0.31	1362	1362	0
pta	1	0.332	2136	2136	0
pth	1	0.326	582	582	0
ptsH	1	0.38	258	258	0
ptsI	1	0.338	1716	1716	0
purA	1	0.393	1299	1299	0
purB	1	0.326	1392	1392	0
purC	1	0.307	714	714	0
purD	1	0.362	1275	1275	0
purE	1	0.375	510	510	0
purF	1	0.369	1419	1419	0
purH	1	0.349	1581	1581	0
purK	1	0.337	1074	1074	0
purL	1	0.361	3894	3894	0
purM	0.884	0.34	1077	957	120
purN	1	0.355	660	660	0
pykA	1	0.361	1464	1464	0
pyrB	1	0.354	1026	994	32
pyrC	1	0.336	1095	1095	0
pyrD	1	0.354	1011	1011	0
pyrE	1	0.342	663	663	0
pyrF	1	0.359	750	750	0
pyrG	1	0.376	1632	1632	0
pyrH	1	0.293	750	750	0
pyrI	1	0.325	471	471	0
queA	1	0.367	1062	1062	0
queF	1	0.307	867	867	0
rbfA	1	0.304	405	405	0
recA	1	0.381	1116	1116	0
recB	1	0.326	3552	3552	0
recC	1	0.318	3297	3297	0
recD	1	0.338	1860	1860	0
recG	1	0.354	2100	2100	0
recJ	1	0.289	1728	1728	0
relA	1	0.335	890	890	0
rho	1	0.385	1260	1260	0
ribA	1	0.383	600	600	0
ribB	1	0.395	636	636	0
ribD	1	0.386	1155	1155	0
ribE	1	0.29	624	624	0
ribF	1	0.364	984	984	0
ribH	1	0.345	519	519	0
rimM	1	0.33	528	528	0
rlmB	1	0.371	747	747	0
rluC	1	0.346	969	969	0
rluD	1	0.37	960	960	0
rmuC	1	0.333	1485	1485	0
rnb	1	0.361	1938	1938	0
rnc	1	0.345	678	678	0
rne	1	0.363	1770	1770	0
rnfB	1	0.354	189	189	0
rnhA	1	0.333	462	462	0
rnpA	1	0.284	348	348	0
rnr	1	0.371	2250	2250	0
rnt	1	0.371	657	657	0
rp1F	1	0.326	534	534	0
rpe	1	0.361	696	696	0
rpiA	1	0.344	672	672	0
rplA	1	0.312	705	705	0
rplB	1	0.37	819	819	0
rplC	1	0.325	699	639	60
rplD	1	0.327	606	606	0
rplE	1	0.291	546	546	0
rplI	1	0.349	453	453	0
rplJ	1	0.339	501	501	0
rplK	1	0.34	429	429	0
rplL	1	0.325	366	366	0
rplM	1	0.333	429	429	0
rplN	1	0.317	483	483	0
rplO	1	0.375	432	432	0
rplP	1	0.384	414	414	0
rplQ	1	0.339	387	387	0
rplR	1	0.365	348	348	0
rplS	1	0.399	348	348	0
rplT	1	0.358	363	363	0
rplU	1	0.301	312	312	0
rplV	1	0.324	333	333	0
rplW	1	0.284	303	303	0
rplX	1	0.289	315	315	0
rplY	1	0.33	285	285	0
rpmA	1	0.357	255	255	0
rpmB	1	0.39	228	228	0
rpmC	1	0.292	192	192	0
rpmD	1	0.322	183	183	0
rpmE	1	0.326	279	279	0
rpmF	1	0.357	171	171	0
rpmG	1	0.321	168	168	0
rpmH	1	0.444	144	144	0
rpmI	1	0.343	198	198	0
rpmJ	1	0.342	117	117	0
rpoA	1	0.354	984	984	0
rpoB	1	0.354	4023	4023	0
rpoC	1	0.368	4227	4227	0
rpoD	1	0.364	1839	1839	0
rpoH	1	0.354	861	861	0
rpoZ	1	0.384	198	198	0
rpsA	1	0.369	1677	1677	0
rpsB	1	0.342	699	699	0
rpsC	1	0.375	702	702	0
rpsD	1	0.356	621	621	0
rpsE	1	0.355	504	504	0
rpsF	1	0.341	378	378	0
rpsG	1	0.363	471	471	0
rpsH	1	0.311	399	399	0
rpsI	1	0.404	399	399	0
rpsJ	1	0.359	312	312	0
rpsK	1	0.385	390	390	0
rpsL	1	0.395	375	375	0
rpsM	1	0.381	357	357	0
rpsN	1	0.366	306	306	0
rpsO	1	0.33	306	306	0
rpsP	1	0.375	267	267	0
rpsQ	1	0.267	270	270	0
rpsR	1	0.39	228	228	0
rpsS	1	0.351	279	279	0
rpsT	1	0.348	264	264	0
rpsU	1	0.363	270	270	0
rrmJ	1	0.33	630	630	0
ruvA	1	0.325	591	591	0
ruvB	1	0.356	1008	1008	0
ruvC	1	0.333	522	522	0
secA	1	0.309	2637	2637	0
secD	1	0.322	1839	1839	0
secE	1	0.271	384	384	0
secF	1	0.318	921	921	0
secG	1	0.283	279	279	0
secY	1	0.313	1335	1335	0
serC	1	0.364	1092	1092	0
serS	1	0.302	1293	1293	0
slyA	1	0.379	435	435	0
smpA	1	0.273	333	333	0
smpB	1	0.34	486	486	0
sodA	1	0.296	624	624	0
spb	1	0.375	990	990	0
sppA	1	0.304	1857	1857	0
sRNA	1	0.408	375	375	0
ssb	1	0.382	498	498	0
sucC	1	0.327	1182	1182	0
sucD	0.999	0.359	885	885	0
sufA	1	0.328	360	360	0
sufB	1	0.34	1476	1476	0
sufC	1	0.316	741	741	0
sufD	1	0.325	1299	1299	0
sufE	1	0.287	435	435	0
sufS	1	0.356	1224	1224	0
suhB	1	0.318	807	807	0
surA	1	0.322	1302	1302	0
tadA	1	0.342	441	441	0
talB	1	0.33	954	954	0
terC	1	0.279	1335	1335	0
tgt	1	0.346	1113	1113	0
thiC	1	0.379	1899	1869	30
thiD	1	0.341	804	804	0
thiE	1	0.36	645	645	0
thiF	1	0.375	774	774	0
thiG	1	0.401	780	780	0
thiH	1	0.362	1149	1149	0
thiI	1	0.283	297	297	0
thiL	1	0.359	978	978	0
thiS	1	0.343	201	201	0
thrS	1	0.322	1929	1929	0
thyA	1	0.361	795	795	0
tig	1	0.299	1311	1311	0
tilS	1	0.342	1461	1461	0
tktA	1	0.372	1998	1998	0
tmk	1	0.344	639	639	0
tolB	1	0.321	1301	1301	0
topA	1	0.33	2574	2574	0
tpiA	1	0.364	771	771	0
trmD	1	0.391	759	759	0
trmE	1	0.32	1374	1374	0
trmU	1	0.34	1107	999	108
troB	1	0.337	843	843	0
trpS	1	0.335	1017	1017	0
truA	1	0.373	804	804	0
truB	1	0.341	954	954	0
trxA	1	0.33	327	327	0
trxB	1	0.324	960	960	0
tsf	1	0.311	843	843	0
tuf	1	0.358	1185	1185	0
tyrS	1	0.32	1275	1275	0
ubiB	1	0.332	720	720	0
ung	1	0.351	669	669	0
uppP	1	0.295	828	828	0
uppS	1	0.339	762	762	0
uvrD	1	0.315	1941	1941	0
valS	1	0.354	2874	2874	0
yafD	1	0.313	837	837	0
yajC	1	0.297	333	333	0
yajR	1	0.317	1410	1410	0
ybbK	1	0.34	903	903	0
ybeY	1	0.316	468	468	0
ybgF	1	0.319	648	648	0
ybgI	1	0.353	747	747	0
ycdX	1	0.329	735	735	0
yceA	1	0.301	975	975	0
ycfH	1	0.317	801	801	0
ychF	1	0.306	1071	1071	0
yclI	1	0.304	303	303	0
ydbK	1	0.365	3492	3492	0
yeaZ	1	0.358	699	699	0
yecC	1	0.362	801	801	0
yecS	1	0.37	657	657	0
yfaE	1	0.33	267	267	0
yfgL	1	0.313	1134	1134	0
ygcM	1	0.356	390	390	0
ygfA	1	0.296	609	609	0
yggW	1	0.303	1158	1158	0
yhgI	1	0.284	573	573	0
yibN	1	0.317	432	432	0
yicC	1	0.379	867	867	0
yicCa	1	0.286	765	765	0
yidD	1	0.318	258	258	0
yifE	1	0.372	339	339	0
yigB	1	0.368	717	717	0
yjcE	1	0.352	1659	1659	0
yjgF	1	0.331	396	396	0
yodO	1	0.333	1020	1020	0
zipA	1	0.327	810	810	0
znuC	1	0.333	855	855	0
zur	1	0.342	444	444	0
zwf	1	0.328	1479	1479	0
AVG.	0.999805
