# Supplementary material for: Genome-Wide Transcriptional Dynamics in the Companion Bacterial Symbionts of the Glassy-Winged Sharpshooter (Cicadellidae: Homalodisca vitripennis) Reveal Differential Gene Expression in Bacteria Occupying Multiple Host Organs
Source: G3 (Bethesda). 2017 Jul 13;7(9):3073–82. doi: 10.1534/g3.117.044255 (PMC5592932; doi:10.1534/g3.117.044255)
Supplement: Supplementary file 5 [file 3073TableS2.xlsx]

## Sheet: Sulcia_Rep1
Table S2: Genome-wide strand-specific gene expression counts for Sulcia and Baumannia replicates from each bacteriome.
start	end	strand	length	gene	synonym	type	reads_fwd	reads_rev	sense_counts	anti_counts	diff_mag	tpm
1	687	+	687	lipB	SMGWSS_001	CDS	2550	1728	2550	1728	1.47569	214.765
712	3324	+	2613	valS	SMGWSS_002	CDS	45808	23585	45808	23585	1.94225	1014.34
3326	5200	+	1875	ftsH	SMGWSS_004	CDS	54596	14249	54596	14249	3.83157	1684.77
5212	6312	+	1101	dnaN	SMGWSS_005	CDS	580	138	580	138	4.2029	30.4805
6325	8547	+	2223	pheT	SMGWSS_006	CDS	14046	329	14046	329	42.693	365.59
8581	9657	+	1077	aroB	SMGWSS_007	CDS	22559	1409	22559	1409	16.0106	1211.95
9644	12106	+	2463	gyrA	SMGWSS_008	CDS	116135	6014	116135	6014	19.3108	2728.22
12106	12624	+	519	methyltransferase	SMGWSS_009	CDS	6588	157	6588	157	41.9618	734.458
12654	14498	+	1845	rpsA	SMGWSS_010	CDS	145753	9007	145753	9007	16.1822	4570.9
14754	16028	+	1275	type_II_NADH_dehydrogenase	SMGWSS_011	CDS	66105	4485	66105	4485	14.7391	2999.89
16020	17183	-	1164	rho	SMGWSS_012	CDS	64421	17784	17784	64421	0.276059	884.011
17237	18304	+	1068	prfA	SMGWSS_013	CDS	144249	6666	144249	6666	21.6395	7814.88
18433	18861	+	429	aroD	SMGWSS_014	CDS	24865	2485	24865	2485	10.006	3353.61
18865	20121	-	1257	fabF	SMGWSS_015	CDS	39786	32826	32826	39786	0.825064	1511
20102	20353	-	252	acpP	SMGWSS_016	CDS	392	5860	5860	392	14.949	1345.48
20365	20664	-	300	atpC	SMGWSS_017	CDS	84	751	751	84	8.94048	144.844
20664	22166	-	1503	atpD	SMGWSS_018	CDS	18982	93726	93726	18982	4.93763	3608.13
22188	22943	+	756	ksgA	SMGWSS_019	CDS	3916	1260	3916	1260	3.10794	299.71
22983	23058	+	76	trnM	SMGWSS_020	RNA	411	10	411	10	41.1	312.903
23063	23644	+	582	signal_peptidase	SMGWSS_021	CDS	1896	491	1896	491	3.86151	188.493
23603	23680	-	78	trnN	SMGWSS_022	RNA	33	139	139	33	4.21212	103.11
23895	25538	-	1644	glnS	SMGWSS_023	CDS	6078	27286	27286	6078	4.48931	960.327
25544	27379	-	1836	gidA	SMGWSS_024	CDS	13521	61229	61229	13521	4.52844	1929.59
27369	27794	-	426	hypothetical	SMGWSS_025	CDS	297	1271	1271	297	4.27946	172.63
27806	28501	+	696	AdoMet__methyltransferase	SMGWSS_026	CDS	3649	6280	3649	6280	0.581051	303.351
28483	28553	-	71	trnC	SMGWSS_027	RNA	17	83	83	17	4.88235	67.6396
28623	29534	+	912	prsA	SMGWSS_028	CDS	54566	20165	54566	20165	2.70598	3461.85
29531	30097	+	567	rplY	SMGWSS_029	CDS	6582	554	6582	554	11.8809	671.67
30171	30917	+	747	lgt	SMGWSS_030	CDS	1645	3929	1645	3929	0.418682	127.417
30868	31725	-	858	atpG	SMGWSS_031	CDS	288	4454	4454	288	15.4653	300.361
31725	33305	-	1581	atpA	SMGWSS_032	CDS	17625	155984	155984	17625	8.85016	5708.59
33283	33615	-	333	atpH	SMGWSS_033	CDS	28	713	713	28	25.4643	123.887
33623	34297	-	675	atpF	SMGWSS_035	CDS	226	12796	12796	226	56.6195	1096.86
34331	34555	-	225	atpE	SMGWSS_036	CDS	595	67413	67413	595	113.299	17335.7
34560	35612	-	1053	atpB	SMGWSS_037	CDS	213	9396	9396	213	44.1127	516.292
35794	37035	-	1242	lysC	SMGWSS_038	CDS	4216	43569	43569	4216	10.3342	2029.72
37171	37740	-	570	marC	SMGWSS_039	CDS	3276	13029	13029	3276	3.97711	1322.57
37816	38871	-	1056	leuB	SMGWSS_040	CDS	7592	94261	94261	7592	12.4158	5164.75
38874	39461	-	588	leuD	SMGWSS_041	CDS	1640	33662	33662	1640	20.5256	3312.41
39469	40854	-	1386	leuC	SMGWSS_042	CDS	6149	179044	179044	6149	29.1176	7474.42
40856	42013	-	1158	leuA	SMGWSS_043	CDS	2705	194035	194035	2705	71.732	9695.1
42065	42427	-	363	hypothetical	SMGWSS_044	CDS	39	3042	3042	39	78	484.879
42497	43798	+	1302	tyrS	SMGWSS_045	CDS	24781	4427	24781	4427	5.5977	1101.26
43913	46579	+	2667	leuS	SMGWSS_046	CDS	36140	2202	36140	2202	16.4124	784.054
46628	46701	+	74	trnF	SMGWSS_047	RNA	675	155	675	155	4.35484	527.78
46732	47616	+	885	korB	SMGWSS_048	CDS	60584	4379	60584	4379	13.8351	3960.92
47610	48854	+	1245	serS	SMGWSS_049	CDS	69405	3367	69405	3367	20.6133	3225.54
48858	49091	+	234	rpmB	SMGWSS_050	CDS	6474	174	6474	174	37.2069	1600.8
49072	49254	+	183	rpmG	SMGWSS_051	CDS	1741	147	1741	147	11.8435	550.464
49261	49383	+	123	hypothetical	SMGWSS_052	CDS	8492	40	8492	40	212.3	3994.72
49385	49461	-	77	trnH	SMGWSS_053	RNA	6352	68	68	6352	0.0107053	51.0974
49486	50499	-	1014	rluD	SMGWSS_054	CDS	3204	7237	7237	3204	2.25874	412.954
50463	51215	+	753	truA	SMGWSS_055	CDS	3845	6141	3845	6141	0.62612	295.449
51207	55730	-	4524	rpoC	SMGWSS_056	CDS	22531	180021	180021	22531	7.98992	2302.4
55741	59727	-	3987	rpoB	SMGWSS_057	CDS	20024	291427	291427	20024	14.5539	4229.26
59737	60168	-	432	rplL	SMGWSS_058	CDS	1268	49544	49544	1268	39.0726	6635.72
60209	60634	-	426	rplJ	SMGWSS_059	CDS	336	33141	33141	336	98.6339	4501.29
60631	61266	-	636	rplA	SMGWSS_060	CDS	3010	79538	79538	3010	26.4246	7236
61274	61696	-	423	rplK	SMGWSS_061	CDS	1191	45027	45027	1191	37.806	6159.05
61859	61936	-	78	trnW	SMGWSS_062	RNA	368	558	558	368	1.5163	413.924
61944	63131	-	1188	tufA	SMGWSS_063	CDS	23663	157170	157170	23663	6.64201	7654.81
63186	63258	-	73	trnT	SMGWSS_064	RNA	529	993	993	529	1.87713	787.059
63276	63351	-	76	trnG	SMGWSS_065	RNA	191	813	813	191	4.25654	618.953
63357	63442	-	86	trnY	SMGWSS_066	RNA	190	1320	1320	190	6.94737	888.089
63455	63528	-	74	trnT	SMGWSS_067	RNA	61	1217	1217	61	19.9508	951.568
63607	64899	+	1293	cyt_C	SMGWSS_068	CDS	11571	1469	11571	1469	7.87679	517.79
64916	67849	+	2934	molybdopterin_oxidoreductase	SMGWSS_069	CDS	75196	7124	75196	7124	10.5553	1482.91
67851	69209	+	1359	molybdopterin_oxidoreductase	SMGWSS_070	CDS	39827	13135	39827	13135	3.03213	1695.66
69206	69733	+	528	hypothetical	SMGWSS_071	CDS	651	2234	651	2234	0.291406	71.3392
69773	70324	+	552	hypothetical	SMGWSS_072	CDS	15129	629	15129	629	24.0525	1585.81
70361	71566	+	1206	hypothetical	SMGWSS_073	CDS	2741	233	2741	233	11.7639	131.505
71558	71977	-	420	sufE	SMGWSS_074	CDS	271	84	84	271	0.309963	11.5721
71993	72973	-	981	ispB	SMGWSS_075	CDS	2897	3788	3788	2897	1.30756	223.42
73220	74764	+	1545	rrsA	SMGWSS_076	RNA	1	0	1	0	#DIV/0!	0.0374501
74816	74889	+	74	trnI	SMGWSS_077	RNA	0	0	0	0	#DIV/0!	0
74894	74967	+	74	trnA	SMGWSS_078	RNA	0	0	0	0	#DIV/0!	0
75111	77988	+	2878	rrlA	SMGWSS_079	RNA	45	0	45	0	#DIV/0!	0.904696
78031	78140	+	110	rrfA	SMGWSS_080	RNA	4788	7	4788	7	684	2518.5
78159	79334	+	1176	sucC	SMGWSS_081	CDS	34408	470	34408	470	73.2085	1692.91
79491	79658	+	168	hypothetical	SMGWSS_082	CDS	3984	2941	3984	2941	1.35464	1372.12
79739	80398	+	660	clpP	SMGWSS_083	CDS	28625	2508	28625	2508	11.4135	2509.47
80411	81442	+	1032	clpX	SMGWSS_084	CDS	25860	3200	25860	3200	8.08125	1449.87
81443	83998	+	2556	mutS	SMGWSS_085	CDS	30318	9607	30318	9607	3.15582	686.311
83989	84064	+	76	trnG	SMGWSS_086	RNA	131	177	131	177	0.740113	99.733
84070	84156	+	87	trnL	SMGWSS_087	RNA	1505	2751	1505	2751	0.547074	1000.92
84159	84827	-	669	rpsB	SMGWSS_088	CDS	3632	44750	44750	3632	12.321	3870.33
84834	85214	-	381	rpsI	SMGWSS_089	CDS	1273	28981	28981	1273	22.7659	4401.18
85219	85671	-	453	rplM	SMGWSS_090	CDS	1100	9622	9622	1100	8.74727	1228.99
85762	87654	+	1893	dnaK	SMGWSS_091	CDS	598549	25926	598549	25926	23.0868	18294.9
87687	88235	+	549	infC	SMGWSS_092	CDS	46248	708	46248	708	65.322	4874.18
88241	88438	+	198	rpmI	SMGWSS_093	CDS	3585	413	3585	413	8.68039	1047.62
88445	88807	+	363	rplT	SMGWSS_094	CDS	6618	1288	6618	1288	5.1382	1054.88
88783	89352	-	570	def	SMGWSS_095	CDS	5913	9906	9906	5913	1.67529	1005.55
89358	89774	-	417	hypothetical	SMGWSS_096	CDS	493	937	937	493	1.90061	130.012
89814	90644	+	831	dapD	SMGWSS_097	CDS	138460	24635	138460	24635	5.62046	9640.6
90672	91718	+	1047	ilvE	SMGWSS_098	CDS	98760	19653	98760	19653	5.02519	5457.77
91715	93052	-	1338	tRNA_nucleotidyltransferase	SMGWSS_099	CDS	2130	9673	9673	2130	4.54131	418.298
93060	94202	-	1143	mnmA	SMGWSS_100	CDS	3330	19797	19797	3330	5.94505	1002.15
94199	95320	-	1122	dnaJ	SMGWSS_101	CDS	10139	78293	78293	10139	7.72196	4037.49
95333	95866	-	534	grpE	SMGWSS_102	CDS	190	9776	9776	190	51.4526	1059.26
95982	97379	+	1398	lpdA	SMGWSS_103	CDS	74475	21201	74475	21201	3.51281	3082.37
97467	98462	+	996	M42	SMGWSS_104	CDS	86624	15798	86624	15798	5.48323	5032.22
98449	98754	-	306	rbfA	SMGWSS_105	CDS	990	201	201	990	0.20303	38.0063
98831	100195	+	1365	trmE	SMGWSS_106	CDS	34248	3550	34248	3550	9.64732	1451.72
100219	100296	+	78	trnV	SMGWSS_107	RNA	311	396	311	396	0.785354	230.7
100318	104553	+	4236	dnaE/dnaQ	SMGWSS_108	CDS	91540	9334	91540	9334	9.80716	1250.36
104576	106318	+	1743	argG/argA	SMGWSS_109	CDS	112336	8368	112336	8368	13.4245	3729.09
106311	107288	+	978	argC	SMGWSS_110	CDS	27940	993	27940	993	28.137	1652.98
107288	108433	+	1146	argD	SMGWSS_111	CDS	108881	2953	108881	2953	36.8713	5497.29
108423	109499	+	1077	carA	SMGWSS_112	CDS	98626	2312	98626	2312	42.6583	5298.55
109496	112684	+	3189	carB	SMGWSS_113	CDS	189916	10908	189916	10908	17.4107	3445.78
112684	113640	+	957	argF	SMGWSS_114	CDS	74269	3461	74269	3461	21.4588	4490.31
113637	114416	+	780	argB	SMGWSS_115	CDS	36398	1915	36398	1915	19.0068	2700
114407	115474	+	1068	argE/dapE	SMGWSS_116	CDS	92058	7820	92058	7820	11.7721	4987.37
115480	115553	+	74	trnD	SMGWSS_117	RNA	494	6	494	6	82.3333	386.257
115559	115635	-	77	trnK	SMGWSS_118	RNA	227	53	53	227	0.23348	39.8259
115708	116193	+	486	aroK	SMGWSS_119	CDS	5599	421	5599	421	13.2993	666.584
116201	117511	+	1311	tilS	SMGWSS_120	CDS	1199	1800	1199	1800	0.666111	52.9173
117501	118256	-	756	trpA	SMGWSS_121	CDS	3303	17076	17076	3303	5.16985	1306.91
118249	120036	-	1788	trpB/trpF	SMGWSS_122	CDS	13574	208936	208936	13574	15.3924	6761.25
120029	120820	-	792	trpC	SMGWSS_123	CDS	205	3503	3503	205	17.0878	255.915
120820	121806	-	987	trpG	SMGWSS_124	CDS	2543	75352	75352	2543	29.6311	4417.32
121803	122375	-	573	trpD	SMGWSS_125	CDS	2334	54538	54538	2334	23.3668	5507.13
122377	123786	-	1410	trpE	SMGWSS_126	CDS	4027	68711	68711	4027	17.0626	2819.6
123800	124939	+	1140	iscS	SMGWSS_127	CDS	6596	22897	6596	22897	0.288073	334.778
124942	126411	-	1470	proS	SMGWSS_128	CDS	13865	27704	27704	13865	1.99812	1090.45
126467	129034	+	2568	ATP-dependent_protease	SMGWSS_129	CDS	151062	18768	151062	18768	8.04891	3403.62
129045	130244	+	1200	lysA	SMGWSS_130	CDS	50556	10806	50556	10806	4.67851	2437.66
130239	130327	+	89	trnS	SMGWSS_131	RNA	852	354	852	354	2.40678	553.899
130348	131418	+	1071	aroC	SMGWSS_132	CDS	125223	12522	125223	12522	10.0002	6765.12
131425	133245	+	1821	htpG	SMGWSS_133	CDS	69828	5747	69828	5747	12.1503	2218.71
133256	134545	-	1290	miaB-like	SMGWSS_134	CDS	3970	4281	4281	3970	1.07834	192.016
134558	137614	-	3057	secA	SMGWSS_135	CDS	16711	90249	90249	16711	5.40057	1708.16
137710	137997	+	288	rplS	SMGWSS_136	CDS	1821	573	1821	573	3.17801	365.846
138001	138261	+	261	ferredoxin	SMGWSS_137	CDS	8854	5402	8854	5402	1.63902	1962.82
138245	139141	+	897	menA	SMGWSS_138	CDS	1127	1089	1127	1089	1.03489	72.6963
139136	140440	-	1305	thrC	SMGWSS_139	CDS	23259	94401	94401	23259	4.05869	4185.5
140444	141376	-	933	thrB	SMGWSS_140	CDS	11443	143403	143403	11443	12.5319	8893.19
141378	143825	-	2448	thrA	SMGWSS_141	CDS	8528	177513	177513	8528	20.8153	4195.65
143854	143929	-	76	trnR	SMGWSS_142	RNA	1210	647	647	1210	0.534711	492.574
143959	144033	-	75	trnP	SMGWSS_143	RNA	52	506	506	52	9.73077	390.364
144040	144125	-	86	trnS	SMGWSS_144	RNA	388	9248	9248	388	23.8351	6222
144137	145420	-	1284	maeA	SMGWSS_145	CDS	8075	456579	456579	8075	56.5423	20574.6
145529	145981	-	453	hypothetical	SMGWSS_146	CDS	57	1949	1949	57	34.193	248.94
145985	146773	-	789	ccoP	SMGWSS_147	CDS	805	79130	79130	805	98.2981	5802.9
146958	149168	-	2211	ccoN_subunit/ccoO	SMGWSS_148	CDS	15921	388175	388175	15921	24.3813	10158.3
149173	149298	-	126	hypothetical	SMGWSS_149	CDS	210	3624	3624	210	17.2571	1664.17
149322	151709	-	2388	ATPase	SMGWSS_150	CDS	4914	63773	63773	4914	12.9778	1545.2
152043	153344	-	1302	engA	SMGWSS_151	CDS	2050	42063	42063	2050	20.5185	1869.26
153341	154201	-	861	lipA	SMGWSS_152	CDS	4061	87063	87063	4061	21.4388	5850.75
154173	154337	-	165	rpmH	SMGWSS_153	CDS	824	10122	10122	824	12.284	3549.47
154415	155290	+	876	sucD	SMGWSS_154	CDS	54043	24231	54043	24231	2.23032	3569.57
155303	155917	-	615	_CAAX	SMGWSS_155	CDS	5363	1046	1046	5363	0.19504	98.4096
155890	155974	-	85	trnL	SMGWSS_156	RNA	2557	861	861	2557	0.336723	586.091
156001	156084	-	84	trnL	SMGWSS_157	RNA	2069	2324	2324	2069	1.12325	1600.8
156195	157946	-	1752	korA	SMGWSS_158	CDS	21755	63132	63132	21755	2.90195	2084.95
157949	158728	-	780	Mrp/Nbp35	SMGWSS_159	CDS	5219	13286	13286	5219	2.5457	985.554
158721	159680	-	960	trpS	SMGWSS_160	CDS	7667	16306	16306	7667	2.12678	982.782
159716	161110	+	1395	NC:_cytC	cytC_1	CDS	2576	3461	2576	3461	0.744294	106.845
161120	162802	+	1683	NC:_cytC	cytC_2	CDS	10428	24170	10428	24170	0.431444	358.507
162978	166394	-	3417	outer_membrane_protein	SMGWSS_162	CDS	6439	98088	98088	6439	15.2334	1660.93
166637	168019	+	1383	asnC	SMGWSS_163	CDS	29080	3533	29080	3533	8.23097	1216.62
168029	168115	+	87	trnS	SMGWSS_164	RNA	811	468	811	468	1.73291	539.365
168146	168222	+	77	trnM	SMGWSS_165	RNA	131	588	131	588	0.222789	98.4377
168246	168560	+	315	rplU	SMGWSS_166	CDS	11145	439	11145	439	25.3872	2047.15
168566	168820	+	255	rpmA	SMGWSS_167	CDS	42114	1954	42114	1954	21.5527	9555.81
168833	168906	+	74	trnR	SMGWSS_168	RNA	2297	767	2297	767	2.99478	1796.02
168916	169302	+	387	ssrA	SMGWSS_169	RNA	378776	2636	378776	2636	143.693	56630.8
169323	169649	+	327	rpsF	SMGWSS_170	CDS	2318	242	2318	242	9.57851	410.154
169660	170202	+	543	rpsR	SMGWSS_171	CDS	24800	772	24800	772	32.1244	2642.61
170371	170781	-	411	SMGWSS_172	SMGWSS_172	CDS	401	141	141	401	0.351621	19.8499
170915	171892	-	978	hypothetical	SMGWSS_173	CDS	1062	4313	4313	1062	4.06121	255.165
171931	172821	-	891	dapA	SMGWSS_174	CDS	15265	24138	24138	15265	1.58126	1567.49
172885	173088	+	204	hypothetical	SMGWSS_175	CDS	647	114	647	114	5.67544	183.508
173285	173929	+	645	prfB	SMGWSS_176	CDS	54984	6486	54984	6486	8.47734	4932.39
173965	174690	+	726	dapB	SMGWSS_177	CDS	54730	3926	54730	3926	13.9404	4361.84
174717	176153	+	1437	lepB	SMGWSS_178	CDS	27555	1708	27555	1708	16.1329	1109.49
176150	176344	+	195	rpsU	SMGWSS_179	CDS	26702	103	26702	103	259.243	7923.01
176356	177132	+	777	aroE	SMGWSS_180	CDS	9390	186	9390	186	50.4839	699.239
177108	178091	-	984	GTP-binding_protein	SMGWSS_181	CDS	31742	7350	7350	31742	0.231554	432.189
178093	179490	-	1398	lpdA	SMGWSS_182	CDS	21893	25435	25435	21893	1.16179	1052.7
179520	179609	-	90	trnL	SMGWSS_183	RNA	4031	244	244	4031	0.0605309	156.866
179620	179997	-	378	hypothetical	SMGWSS_184	CDS	4886	784	784	4886	0.160458	120.007
180036	180109	+	74	trnM	SMGWSS_185	RNA	1559	36	1559	36	43.3056	1218.98
180132	182846	+	2715	sucA	SMGWSS_186	CDS	107499	7774	107499	7774	13.828	2290.95
182851	183996	+	1146	sucB	SMGWSS_187	CDS	110748	9381	110748	9381	11.8056	5591.55
184005	184760	+	756	tatC	SMGWSS_188	CDS	1053	619	1053	619	1.70113	80.5912
184757	185197	-	441	smpB	SMGWSS_189	CDS	370	455	455	370	1.22973	59.6972
185210	185527	+	318	hypothetical	SMGWSS_190	CDS	444	2213	444	2213	0.200633	80.7861
185576	185998	+	423	hypothetical	SMGWSS_191	CDS	70163	2826	70163	2826	24.8277	9597.29
186137	187768	-	1632	groEL	SMGWSS_192	CDS	47549	1950884	1950884	47549	41.0289	69165.9
187777	188055	-	279	groS	SMGWSS_193	CDS	2241	256573	256573	2241	114.49	53209.3
188293	189654	-	1362	miaB	SMGWSS_194	CDS	4894	28182	28182	4894	5.75848	1197.22
189724	191148	+	1425	sufB	SMGWSS_195	CDS	47345	5976	47345	5976	7.92252	1922.38
191168	191908	+	741	sufC	SMGWSS_196	CDS	17866	2558	17866	2558	6.98436	1395.05
191916	193217	+	1302	sufD	SMGWSS_197	CDS	5686	358	5686	358	15.8827	252.683
193221	194447	+	1227	sufS	SMGWSS_198	CDS	27374	7316	27374	7316	3.74166	1290.85
194458	196005	+	1548	infB	SMGWSS_199	CDS	64988	32448	64988	32448	2.00284	2429.09
196009	197079	-	1071	aroG/pheA	SMGWSS_200	CDS	6361	256351	256351	6361	40.3004	13849.3
197097	197918	-	822	pheA	SMGWSS_201	CDS	361	14505	14505	361	40.1801	1021
197872	198894	-	1023	asd	SMGWSS_202	CDS	3527	167564	167564	3527	47.5089	9477.33
198927	199166	-	240	rpsT	SMGWSS_203	CDS	375	5228	5228	375	13.9413	1260.39
199184	199255	-	72	trnE	SMGWSS_204	RNA	285	1193	1193	285	4.18596	958.714
199256	200497	-	1242	aroA	SMGWSS_205	CDS	1258	46538	46538	1258	36.9936	2168.04
200517	200855	-	339	rpsP	SMGWSS_206	CDS	1845	19420	19420	1845	10.5257	3314.6
200890	200960	-	71	trnQ	SMGWSS_207	RNA	998	1036	1036	998	1.03808	844.272
200973	202850	-	1878	gyrB	SMGWSS_208	CDS	4535	74029	74029	4535	16.3239	2280.8
202973	203611	-	639	gidB	SMGWSS_209	CDS	2359	1272	1272	2359	0.539212	115.177
203679	204836	+	1158	aspC	SMGWSS_210	CDS	26591	18065	26591	18065	1.47196	1328.64
204882	205157	+	276	rpmF	SMGWSS_211	CDS	9660	616	9660	616	15.6818	2025.11
205154	206131	-	978	acoB	SMGWSS_212	CDS	48165	63000	63000	48165	1.308	3727.2
206791	207846	-	1056	rpoD	SMGWSS_213	CDS	5844	26546	26546	5844	4.54244	1454.51
207843	210029	-	2187	pnp	SMGWSS_214	CDS	14530	109969	109969	14530	7.56841	2909.39
210045	210281	-	237	rpsO	SMGWSS_215	CDS	151	953	953	151	6.31126	232.662
210291	211019	-	729	ubiE	SMGWSS_216	CDS	85	99	99	85	1.16471	7.85758
211120	211317	+	198	rpmE	SMGWSS_217	CDS	468	45	468	45	10.4	136.761
211388	211783	+	396	rpsL	SMGWSS_218	CDS	37051	2239	37051	2239	16.548	5413.59
211780	212244	+	465	rpsG	SMGWSS_219	CDS	29812	1364	29812	1364	21.8563	3709.53
212258	214339	+	2082	fusA	SMGWSS_220	CDS	163456	7551	163456	7551	21.6469	4542.56
214359	214646	+	288	rpsJ	SMGWSS_221	CDS	19964	374	19964	374	53.3797	4010.85
214652	215272	+	621	rplC	SMGWSS_222	CDS	41002	827	41002	827	49.5792	3820.27
215269	215892	+	624	rplD	SMGWSS_223	CDS	20401	845	20401	845	24.1432	1891.68
215895	216125	+	231	hypothetical	SMGWSS_224	CDS	483	18	483	18	26.8333	120.981
216116	216931	+	816	rplB	SMGWSS_225	CDS	38487	1778	38487	1778	21.6462	2729.01
216939	217220	+	282	rpsS	SMGWSS_226	CDS	8155	369	8155	369	22.1003	1673.23
217228	217632	+	405	rplV	SMGWSS_227	CDS	7304	460	7304	460	15.8783	1043.49
217622	218302	+	681	rpsC	SMGWSS_228	CDS	39474	1343	39474	1343	29.3924	3353.86
218321	218731	+	411	rplP	SMGWSS_229	CDS	40372	1409	40372	1409	28.6529	5683.55
218724	218978	+	255	rpsQ	SMGWSS_230	CDS	7485	87	7485	87	86.0345	1698.37
218982	219344	+	363	rplN	SMGWSS_231	CDS	37167	507	37167	507	73.3077	5924.23
219625	220185	+	561	rplE	SMGWSS_232	CDS	31459	244	31459	244	128.93	3244.61
220178	220447	+	270	rpsN	SMGWSS_233	CDS	41426	1321	41426	1321	31.3596	8877.49
220450	220851	+	402	rpsH	SMGWSS_234	CDS	27859	388	27859	388	71.8015	4009.78
220864	221412	+	549	rplF	SMGWSS_235	CDS	24844	647	24844	647	38.3988	2618.36
221419	221769	+	351	rplR	SMGWSS_236	CDS	23069	110	23069	110	209.718	3802.79
221782	222297	+	516	rpsE	SMGWSS_237	CDS	75282	3001	75282	3001	25.0856	8441.55
222330	222749	+	420	rplO	SMGWSS_238	CDS	12918	618	12918	618	20.9029	1779.62
222752	224053	+	1302	secY	SMGWSS_239	CDS	16230	816	16230	816	19.8897	721.254
224065	224280	+	216	infA	SMGWSS_240	CDS	18878	61	18878	61	309.475	5056.89
224282	224398	+	117	rpmJ	SMGWSS_241	CDS	11483	29	11483	29	395.966	5678.72
224398	224778	+	381	rpsM	SMGWSS_242	CDS	58719	188	58719	188	312.335	8917.33
224779	225165	+	387	rpsK	SMGWSS_243	CDS	84124	1418	84124	1418	59.3258	12577.4
225178	225765	+	588	rpsD	SMGWSS_244	CDS	106502	1349	106502	1349	78.9489	10480
225798	226517	+	720	rpoA	SMGWSS_245	CDS	81672	2373	81672	2373	34.4172	6563.29
226495	226893	+	399	rplQ	SMGWSS_246	CDS	40473	3472	40473	3472	11.657	5869.13
226860	227645	-	786	dapF	SMGWSS_247	CDS	24314	19693	19693	24314	0.809945	1449.67
227669	228571	+	903	mraW	SMGWSS_248	CDS	8959	12680	8959	12680	0.706546	574.054
228583	228915	-	333	rnpB	SMGWSS_266	CDS	27187	219018	219018	27187	8.05598	38055.4
228923	230164	-	1242	putA	SMGWSS_249	CDS	23909	31455	31455	23909	1.31561	1465.38
230211	230399	+	189	hypothetical	SMGWSS_250	CDS	66	18	66	18	3.66667	20.2052
230628	231731	-	1104	mutL	SMGWSS_251	CDS	6914	7202	7202	6914	1.04165	377.455
231763	233103	+	1341	argH	SMGWSS_252	CDS	46638	6502	46638	6502	7.17287	2012.3
233101	233174	-	74	trnR	SMGWSS_253	RNA	3284	57	57	3284	0.0173569	44.5681
233236	234234	+	999	acoA	SMGWSS_254	CDS	78989	6135	78989	6135	12.8751	4574.91
234246	235361	+	1116	aceF	SMGWSS_255	CDS	42912	3348	42912	3348	12.8172	2224.82
235344	236063	-	720	terC	SMGWSS_256	CDS	7782	6026	6026	7782	0.774351	484.259
236272	237276	+	1005	gapA	SMGWSS_257	CDS	266141	13646	266141	13646	19.5032	15322.4
237285	237710	-	426	hypothetical	SMGWSS_258	CDS	1179	88	88	1179	0.0746395	11.9524
237799	238518	+	720	trmH	SMGWSS_259	CDS	3753	3467	3753	3467	1.08249	301.597
238522	239499	-	978	pheS	SMGWSS_260	CDS	11374	31055	31055	11374	2.73035	1837.27
239509	240774	-	1266	ilvA	SMGWSS_261	CDS	9128	89254	89254	9128	9.77805	4079.2
240849	241883	-	1035	ilvC	SMGWSS_262	CDS	12841	1419894	1419894	12841	110.575	79377.3
241893	242144	-	252	ilvN	SMGWSS_263	CDS	22	3803	3803	22	172.864	873.186
242149	243849	-	1701	ilvB	SMGWSS_264	CDS	9407	197442	197442	9407	20.9888	6716.09
243849	245525	-	1677	ilvD	SMGWSS_265	CDS	18433	190639	190639	18433	10.3423	6577.48

## Sheet: Sulcia_rep2
start	end	strand	length	gene	synonym	type	reads_fwd	reads_rev	sense_counts	anti_counts	diff_mag	tpm
168916	169302	+	387	ssrA	SMGWSS_169	RNA	643186	3321	643186	3321	193.672	94781.8
240849	241883	-	1035	ilvC	SMGWSS_262	CDS	9374	1345242	1345242	9374	143.508	74124.1
186137	187768	-	1632	groEL	SMGWSS_192	CDS	41831	1588367	1588367	41831	37.9711	55504.7
187777	188055	-	279	groS	SMGWSS_193	CDS	2809	178771	178771	2809	63.6422	36542
228583	228915	-	333	rnpB	SMGWSS_266	CDS	15212	188544	188544	15212	12.3944	32290
144137	145420	-	1284	maeA	SMGWSS_145	CDS	7036	449716	449716	7036	63.9164	19974.3
34331	34555	-	225	atpE	SMGWSS_036	CDS	424	64851	64851	424	152.95	16437.4
196009	197079	-	1071	aroG/pheA	SMGWSS_200	CDS	6637	281463	281463	6637	42.4082	14987.6
236272	237276	+	1005	gapA	SMGWSS_257	CDS	245661	14416	245661	14416	17.0409	13940.2
197872	198894	-	1023	asd	SMGWSS_202	CDS	4031	248237	248237	4031	61.582	13838.5
85762	87654	+	1893	dnaK	SMGWSS_091	CDS	457407	21122	457407	21122	21.6555	13780.1
89814	90644	+	831	dapD	SMGWSS_097	CDS	166718	21177	166718	21177	7.8726	11441.4
224779	225165	+	387	rpsK	SMGWSS_243	CDS	77218	976	77218	976	79.1168	11379.1
185576	185998	+	423	hypothetical	SMGWSS_191	CDS	84187	5217	84187	5217	16.1371	11350.2
146958	149168	-	2211	ccoN_subunit/ccoO	SMGWSS_148	CDS	12708	425625	425625	12708	33.4927	10978.4
140444	141376	-	933	thrB	SMGWSS_140	CDS	8444	157062	157062	8444	18.6004	9600.39
225178	225765	+	588	rpsD	SMGWSS_244	CDS	98033	1637	98033	1637	59.8858	9508.11
40856	42013	-	1158	leuA	SMGWSS_043	CDS	2333	180023	180023	2333	77.1637	8865.81
144040	144125	-	86	trnS	SMGWSS_144	RNA	162	12174	12174	162	75.1481	8072.98
39469	40854	-	1386	leuC	SMGWSS_042	CDS	4913	192842	192842	4913	39.2514	7934.83
176150	176344	+	195	rpsU	SMGWSS_179	CDS	26155	213	26155	213	122.793	7649.26
17237	18304	+	1068	prfA	SMGWSS_013	CDS	136620	8444	136620	8444	16.1795	7295.28
168566	168820	+	255	rpmA	SMGWSS_167	CDS	30377	1722	30377	1722	17.6405	6793.66
224398	224778	+	381	rpsM	SMGWSS_242	CDS	45309	231	45309	231	196.143	6782.01
220178	220447	+	270	rpsN	SMGWSS_233	CDS	31500	748	31500	748	42.1123	6653.44
90672	91718	+	1047	ilvE	SMGWSS_098	CDS	122133	17836	122133	17836	6.84756	6652.51
221782	222297	+	516	rpsE	SMGWSS_237	CDS	59754	2232	59754	2232	26.7715	6604.14
173965	174690	+	726	dapB	SMGWSS_177	CDS	82458	3428	82458	3428	24.0543	6477.32
242149	243849	-	1701	ilvB	SMGWSS_264	CDS	7558	192249	192249	7558	25.4365	6445.54
130348	131418	+	1071	aroC	SMGWSS_132	CDS	120043	9541	120043	9541	12.5818	6392.14
243849	245525	-	1677	ilvD	SMGWSS_265	CDS	17355	185966	185966	17355	10.7154	6324.11
59737	60168	-	432	rplL	SMGWSS_058	CDS	1721	47280	47280	1721	27.4724	6241.56
225798	226517	+	720	rpoA	SMGWSS_245	CDS	75752	2137	75752	2137	35.4478	6000.13
121803	122375	-	573	trpD	SMGWSS_125	CDS	2426	60231	60231	2426	24.8273	5994.66
114407	115474	+	1068	argE/dapE	SMGWSS_116	CDS	111962	7583	111962	7583	14.7649	5978.59
60631	61266	-	636	rplA	SMGWSS_060	CDS	2097	64196	64196	2097	30.6133	5756.39
37816	38871	-	1056	leuB	SMGWSS_040	CDS	6929	105522	105522	6929	15.229	5698.73
173285	173929	+	645	prfB	SMGWSS_176	CDS	64276	8382	64276	8382	7.66834	5683.14
145985	146773	-	789	ccoP	SMGWSS_147	CDS	617	78291	78291	617	126.89	5658.93
118249	120036	-	1788	trpB/trpF	SMGWSS_122	CDS	12230	176684	176684	12230	14.4468	5635.45
31725	33305	-	1581	atpA	SMGWSS_032	CDS	16988	151894	151894	16988	8.94125	5479.08
61274	61696	-	423	rplK	SMGWSS_061	CDS	1238	40064	40064	1238	32.3619	5401.48
38874	39461	-	588	leuD	SMGWSS_041	CDS	1582	55240	55240	1582	34.9178	5357.66
107288	108433	+	1146	argD	SMGWSS_111	CDS	107604	2974	107604	2974	36.1816	5354.8
182851	183996	+	1146	sucB	SMGWSS_187	CDS	105038	8336	105038	8336	12.6005	5227.1
153341	154201	-	861	lipA	SMGWSS_152	CDS	3134	78837	78837	3134	25.1554	5221.87
224282	224398	+	117	rpmJ	SMGWSS_241	CDS	10557	58	10557	58	182.017	5145.81
108423	109499	+	1077	carA	SMGWSS_112	CDS	97037	2282	97037	2282	42.5228	5138.32
224065	224280	+	216	infA	SMGWSS_240	CDS	19003	99	19003	99	191.949	5017.27
139136	140440	-	1305	thrC	SMGWSS_139	CDS	23257	113176	113176	23257	4.86632	4945.87
239509	240774	-	1266	ilvA	SMGWSS_261	CDS	8668	107172	107172	8668	12.3641	4827.77
84834	85214	-	381	rpsI	SMGWSS_089	CDS	1135	31111	31111	1135	27.4106	4656.81
226495	226893	+	399	rplQ	SMGWSS_246	CDS	32522	5391	32522	5391	6.03265	4648.4
120820	121806	-	987	trpG	SMGWSS_124	CDS	2823	79828	79828	2823	28.2777	4612.51
112684	113640	+	957	argF	SMGWSS_114	CDS	77133	3834	77133	3834	20.1182	4596.5
97467	98462	+	996	M42	SMGWSS_104	CDS	79987	14149	79987	14149	5.65319	4579.93
141378	143825	-	2448	thrA	SMGWSS_141	CDS	8018	192704	192704	8018	24.0339	4489.3
18433	18861	+	429	aroD	SMGWSS_014	CDS	33695	2936	33695	2936	11.4765	4479.27
218982	219344	+	363	rplN	SMGWSS_231	CDS	28168	309	28168	309	91.1586	4425.36
220450	220851	+	402	rpsH	SMGWSS_234	CDS	30303	566	30303	566	53.5389	4298.91
154415	155290	+	876	sucD	SMGWSS_154	CDS	65586	20888	65586	20888	3.13989	4269.79
104576	106318	+	1743	argG/argA	SMGWSS_109	CDS	129522	7992	129522	7992	16.2065	4237.85
60209	60634	-	426	rplJ	SMGWSS_059	CDS	589	31608	31608	589	53.6638	4231.42
12654	14498	+	1845	rpsA	SMGWSS_010	CDS	134184	8281	134184	8281	16.2038	4147.66
198927	199166	-	240	rpsT	SMGWSS_203	CDS	435	17412	17412	435	40.0276	4137.49
233236	234234	+	999	acoA	SMGWSS_254	CDS	70993	4742	70993	4742	14.9711	4052.74
61944	63131	-	1188	tufA	SMGWSS_063	CDS	15178	84133	84133	15178	5.54309	4038.77
218321	218731	+	411	rplP	SMGWSS_229	CDS	28276	835	28276	835	33.8635	3923.52
87687	88235	+	549	infC	SMGWSS_092	CDS	37521	1206	37521	1206	31.1119	3897.64
84159	84827	-	669	rpsB	SMGWSS_088	CDS	4518	45421	45421	4518	10.0533	3871.95
49261	49383	+	123	hypothetical	SMGWSS_052	CDS	8288	131	8288	131	63.2672	3842.77
205154	206131	-	978	acoB	SMGWSS_212	CDS	46576	65669	65669	46576	1.40993	3829.31
221419	221769	+	351	rplR	SMGWSS_236	CDS	23069	151	23069	151	152.775	3748.18
109496	112684	+	3189	carB	SMGWSS_113	CDS	208188	10965	208188	10965	18.9866	3723.06
55741	59727	-	3987	rpoB	SMGWSS_057	CDS	15203	259498	259498	15203	17.0689	3711.82
241893	242144	-	252	ilvN	SMGWSS_263	CDS	60	15663	15663	60	261.05	3544.65
211388	211783	+	396	rpsL	SMGWSS_218	CDS	24068	1427	24068	1427	16.8662	3466.12
46732	47616	+	885	korB	SMGWSS_048	CDS	52089	3525	52089	3525	14.777	3356.62
222330	222749	+	420	rplO	SMGWSS_238	CDS	24603	774	24603	774	31.7868	3340.7
47610	48854	+	1245	serS	SMGWSS_049	CDS	72505	2985	72505	2985	24.2898	3321.22
78031	78140	+	110	rrfA	SMGWSS_080	RNA	6311	17	6311	17	371.235	3271.94
126467	129034	+	2568	ATP-dependent_protease	SMGWSS_129	CDS	143391	16068	143391	16068	8.92401	3184.39
95982	97379	+	1398	lpdA	SMGWSS_103	CDS	77492	19321	77492	19321	4.01077	3161.18
94199	95320	-	1122	dnaJ	SMGWSS_101	CDS	8091	62137	62137	8091	7.67977	3158.32
28623	29534	+	912	prsA	SMGWSS_028	CDS	49618	17914	49618	17914	2.76979	3102.73
149173	149298	-	126	hypothetical	SMGWSS_149	CDS	442	6829	6829	442	15.4502	3090.91
122377	123786	-	1410	trpE	SMGWSS_126	CDS	4299	76260	76260	4299	17.739	3084.44
212258	214339	+	2082	fusA	SMGWSS_220	CDS	110461	4731	110461	4731	23.3483	3025.71
154173	154337	-	165	rpmH	SMGWSS_153	CDS	1602	8745	8745	1602	5.4588	3022.56
220864	221412	+	549	rplF	SMGWSS_235	CDS	29011	1559	29011	1559	18.6087	3013.63
197097	197918	-	822	pheA	SMGWSS_201	CDS	1030	43401	43401	1030	42.1369	3011.11
113637	114416	+	780	argB	SMGWSS_115	CDS	41142	1896	41142	1896	21.6994	3008.08
211780	212244	+	465	rpsG	SMGWSS_219	CDS	24067	1165	24067	1165	20.6584	2951.67
9644	12106	+	2463	gyrA	SMGWSS_008	CDS	126329	4486	126329	4486	28.1607	2925.08
214652	215272	+	621	rplC	SMGWSS_222	CDS	31508	685	31508	685	45.9971	2893.53
14754	16028	+	1275	type_II_NADH_dehydrogenase	SMGWSS_011	CDS	64467	6102	64467	6102	10.5649	2883.54
131425	133245	+	1821	htpG	SMGWSS_133	CDS	91857	6528	91857	6528	14.0712	2876.75
20664	22166	-	1503	atpD	SMGWSS_018	CDS	14300	75352	75352	14300	5.26937	2859.14
169660	170202	+	543	rpsR	SMGWSS_171	CDS	25921	926	25921	926	27.9924	2722.39
219625	220185	+	561	rplE	SMGWSS_232	CDS	26140	402	26140	402	65.0249	2657.31
214359	214646	+	288	rpsJ	SMGWSS_221	CDS	12945	341	12945	341	37.9619	2563.36
217622	218302	+	681	rpsC	SMGWSS_228	CDS	30340	1311	30340	1311	23.1426	2540.78
129045	130244	+	1200	lysA	SMGWSS_130	CDS	52315	7819	52315	7819	6.69075	2486.25
207843	210029	-	2187	pnp	SMGWSS_214	CDS	11446	92743	92743	11446	8.10266	2418.42
194458	196005	+	1548	infB	SMGWSS_199	CDS	64410	35541	64410	35541	1.81227	2372.91
218724	218978	+	255	rpsQ	SMGWSS_230	CDS	10583	229	10583	229	46.214	2366.83
238522	239499	-	978	pheS	SMGWSS_260	CDS	10876	40497	40497	10876	3.72352	2361.47
226860	227645	-	786	dapF	SMGWSS_247	CDS	28162	32446	32446	28162	1.15212	2354.17
180132	182846	+	2715	sucA	SMGWSS_186	CDS	111528	7433	111528	7433	15.0044	2342.68
37171	37740	-	570	marC	SMGWSS_039	CDS	3469	23265	23265	3469	6.70654	2327.7
48858	49091	+	234	rpmB	SMGWSS_050	CDS	9250	346	9250	346	26.7341	2254.37
200973	202850	-	1878	gyrB	SMGWSS_208	CDS	3813	72429	72429	3813	18.9953	2199.46
51207	55730	-	4524	rpoC	SMGWSS_056	CDS	19581	172743	172743	19581	8.82197	2177.59
149322	151709	-	2388	ATPase	SMGWSS_150	CDS	7134	90036	90036	7134	12.6207	2150.21
174717	176153	+	1437	lepB	SMGWSS_178	CDS	53793	3498	53793	3498	15.3782	2134.85
234246	235361	+	1116	aceF	SMGWSS_255	CDS	40870	2462	40870	2462	16.6003	2088.52
200517	200855	-	339	rpsP	SMGWSS_206	CDS	1295	12373	12373	1295	9.55444	2081.49
85219	85671	-	453	rplM	SMGWSS_090	CDS	2785	16359	16359	2785	5.87397	2059.48
231763	233103	+	1341	argH	SMGWSS_252	CDS	48097	5542	48097	5542	8.67864	2045.45
35794	37035	-	1242	lysC	SMGWSS_038	CDS	3299	44077	44077	3299	13.3607	2023.9
216116	216931	+	816	rplB	SMGWSS_225	CDS	28292	1591	28292	1591	17.7825	1977.3
171931	172821	-	891	dapA	SMGWSS_174	CDS	12381	30542	30542	12381	2.46684	1954.87
117501	118256	-	756	trpA	SMGWSS_121	CDS	4556	25806	25806	4556	5.66418	1946.7
168246	168560	+	315	rplU	SMGWSS_166	CDS	10673	757	10673	757	14.0991	1932.3
78159	79334	+	1176	sucC	SMGWSS_081	CDS	39704	575	39704	575	69.0504	1925.42
152043	153344	-	1302	engA	SMGWSS_151	CDS	1579	43581	43581	1579	27.6004	1908.91
156195	157946	-	1752	korA	SMGWSS_158	CDS	23644	57939	57939	23644	2.45047	1885.98
88783	89352	-	570	def	SMGWSS_095	CDS	10286	18616	18616	10286	1.80984	1862.56
25544	27379	-	1836	gidA	SMGWSS_024	CDS	12111	59891	59891	12111	4.94517	1860.32
106311	107288	+	978	argC	SMGWSS_110	CDS	31331	1754	31331	1754	17.8626	1826.98
203679	204836	+	1158	aspC	SMGWSS_210	CDS	36653	18119	36653	18119	2.0229	1805.1
204882	205157	+	276	rpmF	SMGWSS_211	CDS	8651	1824	8651	1824	4.74287	1787.54
138001	138261	+	261	ferredoxin	SMGWSS_137	CDS	8089	4953	8089	4953	1.63315	1767.48
49072	49254	+	183	rpmG	SMGWSS_051	CDS	5670	257	5670	257	22.0623	1766.98
156001	156084	-	84	trnL	SMGWSS_157	RNA	2611	2566	2566	2611	0.982765	1742.11
191168	191908	+	741	sufC	SMGWSS_196	CDS	22578	2454	22578	2454	9.20049	1737.67
79739	80398	+	660	clpP	SMGWSS_083	CDS	19859	2877	19859	2877	6.90268	1715.98
189724	191148	+	1425	sufB	SMGWSS_195	CDS	42428	5778	42428	5778	7.34303	1698
216939	217220	+	282	rpsS	SMGWSS_226	CDS	8373	351	8373	351	23.8547	1693.29
199256	200497	-	1242	aroA	SMGWSS_205	CDS	1276	36009	36009	1276	28.2202	1653.44
33623	34297	-	675	atpF	SMGWSS_035	CDS	441	19387	19387	441	43.9615	1637.97
98831	100195	+	1365	trmE	SMGWSS_106	CDS	38731	4055	38731	4055	9.55142	1618.17
215269	215892	+	624	rplD	SMGWSS_223	CDS	17180	709	17180	709	24.2313	1570.14
3326	5200	+	1875	ftsH	SMGWSS_004	CDS	51363	11634	51363	11634	4.4149	1562.24
18865	20121	-	1257	fabF	SMGWSS_015	CDS	45535	32252	32252	45535	0.70829	1463.26
193221	194447	+	1227	sufS	SMGWSS_198	CDS	31274	6721	31274	6721	4.65318	1453.58
162978	166394	-	3417	outer_membrane_protein	SMGWSS_162	CDS	9037	86462	86462	9037	9.56756	1443.04
180036	180109	+	74	trnM	SMGWSS_185	RNA	1865	68	1865	68	27.4265	1437.3
206791	207846	-	1056	rpoD	SMGWSS_213	CDS	5071	26297	26297	5071	5.18576	1420.17
8581	9657	+	1077	aroB	SMGWSS_007	CDS	26776	1458	26776	1458	18.3649	1417.85
134558	137614	-	3057	secA	SMGWSS_135	CDS	14407	75080	75080	14407	5.21136	1400.64
67851	69209	+	1359	molybdopterin_oxidoreductase	SMGWSS_070	CDS	33215	9125	33215	9125	3.64	1393.84
88241	88438	+	198	rpmI	SMGWSS_093	CDS	4715	840	4715	840	5.6131	1358.05
168833	168906	+	74	trnR	SMGWSS_168	RNA	1752	589	1752	589	2.97453	1350.21
228923	230164	-	1242	putA	SMGWSS_249	CDS	19353	29397	29397	19353	1.51899	1349.83
95333	95866	-	534	grpE	SMGWSS_102	CDS	525	12584	12584	525	23.9695	1343.93
69773	70324	+	552	hypothetical	SMGWSS_072	CDS	12805	442	12805	442	28.9706	1322.94
100318	104553	+	4236	dnaE/dnaQ	SMGWSS_108	CDS	97792	9223	97792	9223	10.6031	1316.58
145529	145981	-	453	hypothetical	SMGWSS_146	CDS	131	10339	10339	131	78.9237	1301.61
217228	217632	+	405	rplV	SMGWSS_227	CDS	9237	631	9237	631	14.6387	1300.69
176356	177132	+	777	aroE	SMGWSS_180	CDS	17229	398	17229	398	43.2889	1264.56
178093	179490	-	1398	lpdA	SMGWSS_182	CDS	18823	30921	30921	18823	1.64272	1261.38
64916	67849	+	2934	molybdopterin_oxidoreductase	SMGWSS_069	CDS	64653	5877	64653	5877	11.001	1256.69
20102	20353	-	252	acpP	SMGWSS_016	CDS	452	5496	5496	452	12.1593	1243.79
80411	81442	+	1032	clpX	SMGWSS_084	CDS	22140	2656	22140	2656	8.33584	1223.48
157949	158728	-	780	Mrp/Nbp35	SMGWSS_159	CDS	6017	16281	16281	6017	2.70583	1190.38
23895	25538	-	1644	glnS	SMGWSS_023	CDS	6732	33715	33715	6732	5.00817	1169.55
42065	42427	-	363	hypothetical	SMGWSS_044	CDS	171	7029	7029	171	41.1053	1104.3
169323	169649	+	327	rpsF	SMGWSS_170	CDS	6124	906	6124	906	6.75938	1068.04
79491	79658	+	168	hypothetical	SMGWSS_082	CDS	3105	2492	3105	2492	1.24599	1054.03
188293	189654	-	1362	miaB	SMGWSS_194	CDS	6238	24858	24858	6238	3.98493	1040.85
84070	84156	+	87	trnL	SMGWSS_087	RNA	1584	1750	1584	1750	0.905143	1038.33
166637	168019	+	1383	asnC	SMGWSS_163	CDS	25121	3882	25121	3882	6.47115	1035.89
12106	12624	+	519	methyltransferase	SMGWSS_009	CDS	9355	196	9355	196	47.7296	1027.96
124942	126411	-	1470	proS	SMGWSS_128	CDS	12733	26424	26424	12733	2.07524	1025.13
93060	94202	-	1143	mnmA	SMGWSS_100	CDS	2792	20497	20497	2792	7.34133	1022.69
88445	88807	+	363	rplT	SMGWSS_094	CDS	6462	1603	6462	1603	4.03119	1015.22
712	3324	+	2613	valS	SMGWSS_002	CDS	45873	23958	45873	23958	1.91473	1001.19
29531	30097	+	567	rplY	SMGWSS_029	CDS	9929	851	9929	851	11.6675	998.669
34560	35612	-	1053	atpB	SMGWSS_037	CDS	376	17794	17794	376	47.3245	963.706
42497	43798	+	1302	tyrS	SMGWSS_045	CDS	21844	4911	21844	4911	4.44797	956.798
63455	63528	-	74	trnT	SMGWSS_067	RNA	52	1172	1172	52	22.5385	903.223
115708	116193	+	486	aroK	SMGWSS_119	CDS	7632	587	7632	587	13.0017	895.574
43913	46579	+	2667	leuS	SMGWSS_046	CDS	39717	2969	39717	2969	13.3772	849.283
172885	173088	+	204	hypothetical	SMGWSS_175	CDS	3033	645	3033	645	4.70233	847.894
16020	17183	-	1164	rho	SMGWSS_012	CDS	54520	16982	16982	54520	0.311482	832.022
200890	200960	-	71	trnQ	SMGWSS_207	RNA	616	1010	1010	616	1.63961	811.264
155890	155974	-	85	trnL	SMGWSS_156	RNA	2286	1180	1180	2286	0.516185	791.703
158721	159680	-	960	trpS	SMGWSS_160	CDS	7477	13116	13116	7477	1.75418	779.165
199184	199255	-	72	trnE	SMGWSS_204	RNA	202	974	974	202	4.82178	771.482
63186	63258	-	73	trnT	SMGWSS_064	RNA	473	966	966	473	2.04228	754.664
63357	63442	-	86	trnY	SMGWSS_066	RNA	80	1082	1082	80	13.525	717.51
115480	115553	+	74	trnD	SMGWSS_117	RNA	931	12	931	12	77.5833	717.492
143854	143929	-	76	trnR	SMGWSS_142	RNA	880	923	923	880	1.04886	692.608
61859	61936	-	78	trnW	SMGWSS_062	RNA	277	864	864	277	3.11913	631.711
81443	83998	+	2556	mutS	SMGWSS_085	CDS	27733	11787	27733	11787	2.35285	618.778
210045	210281	-	237	rpsO	SMGWSS_215	CDS	502	2549	2549	502	5.07769	613.367
130239	130327	+	89	trnS	SMGWSS_131	RNA	957	160	957	160	5.98125	613.227
168029	168115	+	87	trnS	SMGWSS_164	RNA	927	347	927	347	2.67147	607.659
222752	224053	+	1302	secY	SMGWSS_239	CDS	13207	729	13207	729	18.1166	578.485
137710	137997	+	288	rplS	SMGWSS_136	CDS	2920	1525	2920	1525	1.91475	578.215
63276	63351	-	76	trnG	SMGWSS_065	RNA	86	734	734	86	8.53488	550.784
170915	171892	-	978	hypothetical	SMGWSS_173	CDS	1178	9374	9374	1178	7.95756	546.62
63607	64899	+	1293	cyt_C	SMGWSS_068	CDS	11926	2768	11926	2768	4.30853	526.012
235344	236063	-	720	terC	SMGWSS_256	CDS	4924	6247	6247	4924	1.26868	494.81
227669	228571	+	903	mraW	SMGWSS_248	CDS	7692	35042	7692	35042	0.219508	485.792
177108	178091	-	984	GTP-binding_protein	SMGWSS_181	CDS	33275	8346	8346	33275	0.250819	483.707
50463	51215	+	753	truA	SMGWSS_055	CDS	6281	7397	6281	7397	0.849128	475.7
89358	89774	-	417	hypothetical	SMGWSS_096	CDS	2483	3448	3448	2483	1.38864	471.553
49486	50499	-	1014	rluD	SMGWSS_054	CDS	7378	7991	7991	7378	1.08308	449.43
30868	31725	-	858	atpG	SMGWSS_031	CDS	679	6308	6308	679	9.29013	419.279
46628	46701	+	74	trnF	SMGWSS_047	RNA	540	59	540	59	9.15254	416.161
33283	33615	-	333	atpH	SMGWSS_033	CDS	115	2429	2429	115	21.1217	415.99
161120	162802	+	1683	NC:_cytC	cytC_2	CDS	12087	25701	12087	25701	0.470293	409.575
20365	20664	-	300	atpC	SMGWSS_017	CDS	232	2047	2047	232	8.82328	389.131
22983	23058	+	76	trnM	SMGWSS_020	RNA	516	46	516	46	11.2174	387.2
211120	211317	+	198	rpmE	SMGWSS_217	CDS	1330	101	1330	101	13.1683	383.077
237799	238518	+	720	trmH	SMGWSS_259	CDS	4792	9168	4792	9168	0.522688	379.563
27369	27794	-	426	hypothetical	SMGWSS_025	CDS	701	2813	2813	701	4.01284	376.582
91715	93052	-	1338	tRNA_nucleotidyltransferase	SMGWSS_099	CDS	3488	8532	8532	3488	2.4461	363.659
123800	124939	+	1140	iscS	SMGWSS_127	CDS	6528	27664	6528	27664	0.235975	326.569
215895	216125	+	231	hypothetical	SMGWSS_224	CDS	1297	52	1297	52	24.9423	320.204
230628	231731	-	1104	mutL	SMGWSS_251	CDS	4633	6127	6127	4633	1.32247	316.503
143959	144033	-	75	trnP	SMGWSS_143	RNA	30	416	416	30	13.8667	316.323
22188	22943	+	756	ksgA	SMGWSS_019	CDS	4059	1198	4059	1198	3.38815	306.194
120029	120820	-	792	trpC	SMGWSS_123	CDS	543	4202	4202	543	7.73849	302.573
1	687	+	687	lipB	SMGWSS_001	CDS	3543	3040	3543	3040	1.16546	294.113
71993	72973	-	981	ispB	SMGWSS_075	CDS	2708	4991	4991	2708	1.84306	290.147
6325	8547	+	2223	pheT	SMGWSS_006	CDS	10996	526	10996	526	20.9049	282.094
155303	155917	-	615	_CAAX	SMGWSS_155	CDS	13566	2899	2899	13566	0.213696	268.827
27806	28501	+	696	AdoMet__methyltransferase	SMGWSS_026	CDS	3046	7681	3046	7681	0.396563	249.586
191916	193217	+	1302	sufD	SMGWSS_197	CDS	5398	614	5398	614	8.79153	236.44
23063	23644	+	582	signal_peptidase	SMGWSS_021	CDS	2322	914	2322	914	2.54048	227.53
133256	134545	-	1290	miaB-like	SMGWSS_134	CDS	6106	4988	4988	6106	0.816901	220.514
30171	30917	+	747	lgt	SMGWSS_030	CDS	2748	5444	2748	5444	0.504776	209.795
70361	71566	+	1206	hypothetical	SMGWSS_073	CDS	4250	334	4250	334	12.7246	200.974
100219	100296	+	78	trnV	SMGWSS_107	RNA	268	267	268	267	1.00375	195.947
202973	203611	-	639	gidB	SMGWSS_209	CDS	5513	2166	2166	5513	0.39289	193.311
28483	28553	-	71	trnC	SMGWSS_027	RNA	65	234	234	65	3.6	187.956
179520	179609	-	90	trnL	SMGWSS_183	RNA	2722	289	289	2722	0.106172	183.128
159716	161110	+	1395	NC:_cytC	cytC_1	CDS	4436	5794	4436	5794	0.76562	181.35
184005	184760	+	756	tatC	SMGWSS_188	CDS	2221	949	2221	949	2.34036	167.543
184757	185197	-	441	smpB	SMGWSS_189	CDS	568	1216	1216	568	2.14085	157.251
138245	139141	+	897	menA	SMGWSS_138	CDS	2289	2639	2289	2639	0.867374	145.53
185210	185527	+	318	hypothetical	SMGWSS_190	CDS	794	3695	794	3695	0.214885	142.394
49385	49461	-	77	trnH	SMGWSS_053	RNA	6226	181	181	6226	0.0290716	134.056
168146	168222	+	77	trnM	SMGWSS_165	RNA	176	322	176	322	0.546584	130.353
179620	179997	-	378	hypothetical	SMGWSS_184	CDS	7907	859	859	7907	0.108638	129.599
23603	23680	-	78	trnN	SMGWSS_022	RNA	23	174	174	23	7.56522	127.22
98449	98754	-	306	rbfA	SMGWSS_105	CDS	3031	619	619	3031	0.204223	115.364
83989	84064	+	76	trnG	SMGWSS_086	RNA	138	267	138	267	0.516854	103.553
69206	69733	+	528	hypothetical	SMGWSS_071	CDS	912	1961	912	1961	0.465069	98.5054
233101	233174	-	74	trnR	SMGWSS_253	RNA	3180	105	105	3180	0.0330189	80.9202
116201	117511	+	1311	tilS	SMGWSS_120	CDS	1777	3035	1777	3035	0.585502	77.3008
115559	115635	-	77	trnK	SMGWSS_118	RNA	290	99	99	290	0.341379	73.3236
170371	170781	-	411	SMGWSS_172	SMGWSS_172	CDS	1651	322	322	1651	0.195033	44.68
5212	6312	+	1101	dnaN	SMGWSS_005	CDS	854	322	854	322	2.65217	44.2354
230211	230399	+	189	hypothetical	SMGWSS_250	CDS	146	106	146	106	1.37736	44.0545
237285	237710	-	426	hypothetical	SMGWSS_258	CDS	4305	243	243	4305	0.056446	32.5309
71558	71977	-	420	sufE	SMGWSS_074	CDS	652	125	125	652	0.191718	16.9731
210291	211019	-	729	ubiE	SMGWSS_216	CDS	199	188	188	199	0.944724	14.7072
75111	77988	+	2878	rrlA	SMGWSS_079	RNA	275	3	275	3	91.6667	5.4493
73220	74764	+	1545	rrsA	SMGWSS_076	RNA	8	1	8	1	8	0.295298
74816	74889	+	74	trnI	SMGWSS_077	RNA	0	0	0	0	0	0
74894	74967	+	74	trnA	SMGWSS_078	RNA	0	0	0	0	0	0

## Sheet: Sulcia_rep3
start	end	strand	length	gene	synonym	type	reads_fwd	reads_rev	sense_counts	anti_counts	diff_mag	tpm
1	687	+	687	lipB	SMGWSS_001	CDS	4172	2608	4172	2608	1.59969	401.032
712	3324	+	2613	valS	SMGWSS_002	CDS	44017	22849	44017	22849	1.92643	1112.43
3326	5200	+	1875	ftsH	SMGWSS_004	CDS	45789	11804	45789	11804	3.87911	1612.69
5212	6312	+	1101	dnaN	SMGWSS_005	CDS	944	261	944	261	3.61686	56.6208
6325	8547	+	2223	pheT	SMGWSS_006	CDS	11592	569	11592	569	20.3726	344.358
8581	9657	+	1077	aroB	SMGWSS_007	CDS	21835	1570	21835	1570	13.9076	1338.84
9644	12106	+	2463	gyrA	SMGWSS_008	CDS	110872	5200	110872	5200	21.3215	2972.68
12106	12624	+	519	methyltransferase	SMGWSS_009	CDS	8334	167	8334	167	49.9042	1060.42
12654	14498	+	1845	rpsA	SMGWSS_010	CDS	111817	8225	111817	8225	13.5948	4002.24
14754	16028	+	1275	type_II_NADH_dehydrogenase	SMGWSS_011	CDS	54879	5710	54879	5710	9.61103	2842.41
16020	17183	-	1164	rho	SMGWSS_012	CDS	49008	14725	14725	49008	0.300461	835.398
17237	18304	+	1068	prfA	SMGWSS_013	CDS	119542	8467	119542	8467	14.1186	7391.64
18433	18861	+	429	aroD	SMGWSS_014	CDS	30371	2843	30371	2843	10.6827	4675.12
18865	20121	-	1257	fabF	SMGWSS_015	CDS	40526	26751	26751	40526	0.660095	1405.39
20102	20353	-	252	acpP	SMGWSS_016	CDS	560	4866	4866	560	8.68929	1275.15
20365	20664	-	300	atpC	SMGWSS_017	CDS	207	1849	1849	207	8.93237	407.012
20664	22166	-	1503	atpD	SMGWSS_018	CDS	15462	68847	68847	15462	4.45266	3024.94
22188	22943	+	756	ksgA	SMGWSS_019	CDS	3951	1355	3951	1355	2.91587	345.125
22983	23058	+	76	trnM	SMGWSS_020	RNA	508	51	508	51	9.96078	441.409
23063	23644	+	582	signal_peptidase	SMGWSS_021	CDS	2808	1352	2808	1352	2.07692	318.614
23603	23680	-	78	trnN	SMGWSS_022	RNA	28	162	162	28	5.78571	137.155
23895	25538	-	1644	glnS	SMGWSS_023	CDS	8104	29218	29218	8104	3.60538	1173.65
25544	27379	-	1836	gidA	SMGWSS_024	CDS	13090	54013	54013	13090	4.12628	1942.75
27369	27794	-	426	hypothetical	SMGWSS_025	CDS	769	2372	2372	769	3.08453	367.702
27806	28501	+	696	AdoMet__methyltransferase	SMGWSS_026	CDS	2232	6962	2232	6962	0.320598	211.776
28483	28553	-	71	trnC	SMGWSS_027	RNA	24	132	132	24	5.5	122.774
28623	29534	+	912	prsA	SMGWSS_028	CDS	44768	16183	44768	16183	2.76636	3241.63
29531	30097	+	567	rplY	SMGWSS_029	CDS	8643	727	8643	727	11.8886	1006.64
30171	30917	+	747	lgt	SMGWSS_030	CDS	2154	4388	2154	4388	0.490884	190.422
30868	31725	-	858	atpG	SMGWSS_031	CDS	698	5156	5156	698	7.38682	396.841
31725	33305	-	1581	atpA	SMGWSS_032	CDS	16901	115330	115330	16901	6.82386	4817.28
33283	33615	-	333	atpH	SMGWSS_033	CDS	99	1673	1673	99	16.899	331.774
33623	34297	-	675	atpF	SMGWSS_035	CDS	361	13919	13919	361	38.5568	1361.74
34331	34555	-	225	atpE	SMGWSS_036	CDS	392	53515	53515	392	136.518	15706.7
34560	35612	-	1053	atpB	SMGWSS_037	CDS	350	13260	13260	350	37.8857	831.585
35794	37035	-	1242	lysC	SMGWSS_038	CDS	3514	33522	33522	3514	9.53956	1782.38
37171	37740	-	570	marC	SMGWSS_039	CDS	3292	17738	17738	3292	5.38821	2055.04
37816	38871	-	1056	leuB	SMGWSS_040	CDS	7285	74443	74443	7285	10.2187	4655.34
38874	39461	-	588	leuD	SMGWSS_041	CDS	1796	38744	38744	1796	21.5724	4351.29
39469	40854	-	1386	leuC	SMGWSS_042	CDS	6437	143724	143724	6437	22.3278	6847.9
40856	42013	-	1158	leuA	SMGWSS_043	CDS	3217	136027	136027	3217	42.2838	7757.25
42065	42427	-	363	hypothetical	SMGWSS_044	CDS	202	5324	5324	202	26.3564	968.551
42497	43798	+	1302	tyrS	SMGWSS_045	CDS	20319	4580	20319	4580	4.43646	1030.58
43913	46579	+	2667	leuS	SMGWSS_046	CDS	30006	2465	30006	2465	12.1728	742.979
46628	46701	+	74	trnF	SMGWSS_047	RNA	459	68	459	68	6.75	409.612
46732	47616	+	885	korB	SMGWSS_048	CDS	46718	4129	46718	4129	11.3146	3486.04
47610	48854	+	1245	serS	SMGWSS_049	CDS	64543	3173	64543	3173	20.3413	3423.51
48858	49091	+	234	rpmB	SMGWSS_050	CDS	8810	436	8810	436	20.2064	2486.29
49072	49254	+	183	rpmG	SMGWSS_051	CDS	4928	299	4928	299	16.4816	1778.32
49261	49383	+	123	hypothetical	SMGWSS_052	CDS	7462	112	7462	112	66.625	4006.28
49385	49461	-	77	trnH	SMGWSS_053	RNA	5889	121	121	5889	0.0205468	103.773
49486	50499	-	1014	rluD	SMGWSS_054	CDS	7085	5974	5974	7085	0.84319	389.062
50463	51215	+	753	truA	SMGWSS_055	CDS	5322	5443	5322	5443	0.97777	466.736
51207	55730	-	4524	rpoC	SMGWSS_056	CDS	21526	148961	148961	21526	6.92005	2174.41
55741	59727	-	3987	rpoB	SMGWSS_057	CDS	15505	229562	229562	15505	14.8057	3802.29
59737	60168	-	432	rplL	SMGWSS_058	CDS	1603	39650	39650	1603	24.7349	6061.09
60209	60634	-	426	rplJ	SMGWSS_059	CDS	787	26695	26695	787	33.9199	4138.2
60631	61266	-	636	rplA	SMGWSS_060	CDS	2376	55267	55267	2376	23.2605	5738.52
61274	61696	-	423	rplK	SMGWSS_061	CDS	1166	33102	33102	1166	28.3894	5167.79
61859	61936	-	78	trnW	SMGWSS_062	RNA	206	1049	1049	206	5.09223	888.121
61944	63131	-	1188	tufA	SMGWSS_063	CDS	13569	88519	88519	13569	6.52362	4920.52
63186	63258	-	73	trnT	SMGWSS_064	RNA	554	1019	1019	554	1.83935	921.812
63276	63351	-	76	trnG	SMGWSS_065	RNA	100	826	826	100	8.26	717.724
63357	63442	-	86	trnY	SMGWSS_066	RNA	93	1289	1289	93	13.8602	989.796
63455	63528	-	74	trnT	SMGWSS_067	RNA	36	1181	1181	36	32.8056	1053.92
63607	64899	+	1293	cyt_C	SMGWSS_068	CDS	10566	2244	10566	2244	4.70856	539.639
64916	67849	+	2934	molybdopterin_oxidoreductase	SMGWSS_069	CDS	53944	6405	53944	6405	8.42217	1214.16
67851	69209	+	1359	molybdopterin_oxidoreductase	SMGWSS_070	CDS	30004	10403	30004	10403	2.88417	1457.98
69206	69733	+	528	hypothetical	SMGWSS_071	CDS	823	1691	823	1691	0.486694	102.934
69773	70324	+	552	hypothetical	SMGWSS_072	CDS	10137	411	10137	411	24.6642	1212.72
70361	71566	+	1206	hypothetical	SMGWSS_073	CDS	3654	331	3654	331	11.0393	200.084
71558	71977	-	420	sufE	SMGWSS_074	CDS	636	66	66	636	0.103774	10.3773
71993	72973	-	981	ispB	SMGWSS_075	CDS	3152	2437	2437	3152	0.77316	164.051
73220	74764	+	1545	rrsA	SMGWSS_076	RNA	20	0	20	0	0	0.854856
74816	74889	+	74	trnI	SMGWSS_077	RNA	0	0	0	0	0	0
74894	74967	+	74	trnA	SMGWSS_078	RNA	0	0	0	0	0	0
75111	77988	+	2878	rrlA	SMGWSS_079	RNA	279	0	279	0	0	6.40184
78031	78140	+	110	rrfA	SMGWSS_080	RNA	4546	18	4546	18	252.556	2729.15
78159	79334	+	1176	sucC	SMGWSS_081	CDS	32953	701	32953	701	47.0086	1850.46
79491	79658	+	168	hypothetical	SMGWSS_082	CDS	3417	2060	3417	2060	1.65874	1343.16
79739	80398	+	660	clpP	SMGWSS_083	CDS	21932	2330	21932	2330	9.41288	2194.45
80411	81442	+	1032	clpX	SMGWSS_084	CDS	23915	2226	23915	2226	10.7435	1530.32
81443	83998	+	2556	mutS	SMGWSS_085	CDS	26916	9933	26916	9933	2.70976	695.41
83989	84064	+	76	trnG	SMGWSS_086	RNA	112	164	112	164	0.682927	97.3186
84070	84156	+	87	trnL	SMGWSS_087	RNA	1262	1516	1262	1516	0.832454	957.925
84159	84827	-	669	rpsB	SMGWSS_088	CDS	4249	33987	33987	4249	7.99882	3354.89
84834	85214	-	381	rpsI	SMGWSS_089	CDS	1325	23544	23544	1325	17.7691	4080.81
85219	85671	-	453	rplM	SMGWSS_090	CDS	2214	12928	12928	2214	5.83921	1884.62
85762	87654	+	1893	dnaK	SMGWSS_091	CDS	369627	23524	369627	23524	15.7128	12894.5
87687	88235	+	549	infC	SMGWSS_092	CDS	28926	1250	28926	1250	23.1408	3479.42
88241	88438	+	198	rpmI	SMGWSS_093	CDS	3455	944	3455	944	3.65996	1152.32
88445	88807	+	363	rplT	SMGWSS_094	CDS	5159	1808	5159	1808	2.85343	938.534
88783	89352	-	570	def	SMGWSS_095	CDS	8485	16364	16364	8485	1.92858	1895.86
89358	89774	-	417	hypothetical	SMGWSS_096	CDS	2085	2732	2732	2085	1.31031	432.649
89814	90644	+	831	dapD	SMGWSS_097	CDS	130215	18609	130215	18609	6.99742	10347.9
90672	91718	+	1047	ilvE	SMGWSS_098	CDS	94163	15139	94163	15139	6.2199	5939.16
91715	93052	-	1338	tRNA_nucleotidyltransferase	SMGWSS_099	CDS	2933	7317	7317	2933	2.49472	361.134
93060	94202	-	1143	mnmA	SMGWSS_100	CDS	3140	16587	16587	3140	5.28248	958.325
94199	95320	-	1122	dnaJ	SMGWSS_101	CDS	8805	49176	49176	8805	5.58501	2894.35
95333	95866	-	534	grpE	SMGWSS_102	CDS	593	10468	10468	593	17.6526	1294.53
95982	97379	+	1398	lpdA	SMGWSS_103	CDS	60089	17181	60089	17181	3.49741	2838.44
97467	98462	+	996	M42	SMGWSS_104	CDS	64321	13506	64321	13506	4.7624	4264.66
98449	98754	-	306	rbfA	SMGWSS_105	CDS	2266	559	559	2266	0.24669	120.637
98831	100195	+	1365	trmE	SMGWSS_106	CDS	28893	4123	28893	4123	7.00776	1397.82
100219	100296	+	78	trnV	SMGWSS_107	RNA	291	329	291	329	0.884498	246.371
100318	104553	+	4236	dnaE/dnaQ	SMGWSS_108	CDS	89602	11182	89602	11182	8.01306	1396.86
104576	106318	+	1743	argG/argA	SMGWSS_109	CDS	98309	8258	98309	8258	11.9047	3724.66
106311	107288	+	978	argC	SMGWSS_110	CDS	25271	1950	25271	1950	12.9595	1706.38
107288	108433	+	1146	argD	SMGWSS_111	CDS	84218	3510	84218	3510	23.9937	4853.01
108423	109499	+	1077	carA	SMGWSS_112	CDS	74474	3240	74474	3240	22.9858	4566.47
109496	112684	+	3189	carB	SMGWSS_113	CDS	166688	12204	166688	12204	13.6585	3451.76
112684	113640	+	957	argF	SMGWSS_114	CDS	58949	4675	58949	4675	12.6094	4067.76
113637	114416	+	780	argB	SMGWSS_115	CDS	30572	2219	30572	2219	13.7774	2588.34
114407	115474	+	1068	argE/dapE	SMGWSS_116	CDS	88506	8293	88506	8293	10.6724	5472.59
115480	115553	+	74	trnD	SMGWSS_117	RNA	951	9	951	9	105.667	848.672
115559	115635	-	77	trnK	SMGWSS_118	RNA	202	90	90	202	0.445545	77.1868
115708	116193	+	486	aroK	SMGWSS_119	CDS	5907	581	5907	581	10.167	802.642
116201	117511	+	1311	tilS	SMGWSS_120	CDS	1630	2455	1630	2455	0.663951	82.1062
117501	118256	-	756	trpA	SMGWSS_121	CDS	4448	22683	22683	4448	5.0996	1981.39
118249	120036	-	1788	trpB/trpF	SMGWSS_122	CDS	11945	148881	148881	11945	12.4639	5498.74
120029	120820	-	792	trpC	SMGWSS_123	CDS	543	3418	3418	543	6.29466	284.996
120820	121806	-	987	trpG	SMGWSS_124	CDS	2536	66761	66761	2536	26.3253	4466.8
121803	122375	-	573	trpD	SMGWSS_125	CDS	2629	49624	49624	2629	18.8756	5719.11
122377	123786	-	1410	trpE	SMGWSS_126	CDS	4048	59966	59966	4048	14.8137	2808.52
123800	124939	+	1140	iscS	SMGWSS_127	CDS	6102	22285	6102	22285	0.273816	353.475
124942	126411	-	1470	proS	SMGWSS_128	CDS	12284	23727	23727	12284	1.93154	1065.9
126467	129034	+	2568	ATP-dependent_protease	SMGWSS_129	CDS	114521	18843	114521	18843	6.07764	2944.97
129045	130244	+	1200	lysA	SMGWSS_130	CDS	39759	8610	39759	8610	4.61777	2187.99
130239	130327	+	89	trnS	SMGWSS_131	RNA	837	170	837	170	4.92353	621.05
130348	131418	+	1071	aroC	SMGWSS_132	CDS	96477	11037	96477	11037	8.74123	5948.75
131425	133245	+	1821	htpG	SMGWSS_133	CDS	72096	6769	72096	6769	10.6509	2614.52
133256	134545	-	1290	miaB-like	SMGWSS_134	CDS	4571	4678	4678	4571	1.02341	239.476
134558	137614	-	3057	secA	SMGWSS_135	CDS	14673	80321	80321	14673	5.47407	1735.1
137710	137997	+	288	rplS	SMGWSS_136	CDS	2521	1460	2521	1460	1.72671	578.058
138001	138261	+	261	ferredoxin	SMGWSS_137	CDS	7609	4844	7609	4844	1.57081	1925.21
138245	139141	+	897	menA	SMGWSS_138	CDS	2204	2521	2204	2521	0.874256	162.26
139136	140440	-	1305	thrC	SMGWSS_139	CDS	24631	90830	90830	24631	3.68763	4596.32
140444	141376	-	933	thrB	SMGWSS_140	CDS	9734	119726	119726	9734	12.2998	8474.19
141378	143825	-	2448	thrA	SMGWSS_141	CDS	10236	159601	159601	10236	15.5921	4305.42
143854	143929	-	76	trnR	SMGWSS_142	RNA	1138	724	724	1138	0.636204	629.095
143959	144033	-	75	trnP	SMGWSS_143	RNA	26	370	370	26	14.2308	325.785
144040	144125	-	86	trnS	SMGWSS_144	RNA	160	11023	11023	160	68.8937	8464.33
144137	145420	-	1284	maeA	SMGWSS_145	CDS	9449	334396	334396	9449	35.3896	17198.4
145529	145981	-	453	hypothetical	SMGWSS_146	CDS	170	7618	7618	170	44.8118	1110.54
145985	146773	-	789	ccoP	SMGWSS_147	CDS	629	54779	54779	629	87.089	4584.88
146958	149168	-	2211	ccoN_subunit/ccoO	SMGWSS_148	CDS	13972	331270	331270	13972	23.7096	9894.29
149173	149298	-	126	hypothetical	SMGWSS_149	CDS	441	5234	5234	441	11.8685	2743.18
149322	151709	-	2388	ATPase	SMGWSS_150	CDS	6763	71267	71267	6763	10.5378	1970.81
152043	153344	-	1302	engA	SMGWSS_151	CDS	1772	37214	37214	1772	21.0011	1887.5
153341	154201	-	861	lipA	SMGWSS_152	CDS	3311	68588	68588	3311	20.7152	5260.61
154173	154337	-	165	rpmH	SMGWSS_153	CDS	1522	7604	7604	1522	4.99606	3043.33
154415	155290	+	876	sucD	SMGWSS_154	CDS	44104	18164	44104	18164	2.4281	3324.8
155303	155917	-	615	_CAAX	SMGWSS_155	CDS	9503	2360	2360	9503	0.248343	253.413
155890	155974	-	85	trnL	SMGWSS_156	RNA	1505	916	916	1505	0.608638	711.652
156001	156084	-	84	trnL	SMGWSS_157	RNA	1353	1680	1680	1353	1.24169	1320.75
156195	157946	-	1752	korA	SMGWSS_158	CDS	18835	49691	49691	18835	2.63823	1872.99
157949	158728	-	780	Mrp/Nbp35	SMGWSS_159	CDS	5475	15252	15252	5475	2.78575	1291.29
158721	159680	-	960	trpS	SMGWSS_160	CDS	6320	11913	11913	6320	1.88497	819.485
159716	161110	+	1395	NC:_cytC	cytC_1	CDS	3769	6035	3769	6035	0.624524	178.42
161120	162802	+	1683	NC:_cytC	cytC_2	CDS	10224	22701	10224	22701	0.450377	401.17
162978	166394	-	3417	outer_membrane_protein	SMGWSS_162	CDS	10790	74054	74054	10790	6.86321	1431.18
166637	168019	+	1383	asnC	SMGWSS_163	CDS	23364	4170	23364	4170	5.60288	1115.62
168029	168115	+	87	trnS	SMGWSS_164	RNA	1126	453	1126	453	2.48565	854.693
168146	168222	+	77	trnM	SMGWSS_165	RNA	145	430	145	430	0.337209	124.357
168246	168560	+	315	rplU	SMGWSS_166	CDS	7528	865	7528	865	8.70289	1578.19
168566	168820	+	255	rpmA	SMGWSS_167	CDS	24818	1892	24818	1892	13.1173	6427.14
168833	168906	+	74	trnR	SMGWSS_168	RNA	1679	707	1679	707	2.37482	1498.34
168916	169302	+	387	ssrA	SMGWSS_169	RNA	725997	3569	725997	3569	203.417	123884
169323	169649	+	327	rpsF	SMGWSS_170	CDS	2727	656	2727	656	4.15701	550.717
169660	170202	+	543	rpsR	SMGWSS_171	CDS	18605	1087	18605	1087	17.1159	2262.67
170371	170781	-	411	SMGWSS_172	SMGWSS_172	CDS	1757	243	243	1757	0.138304	39.0441
170915	171892	-	978	hypothetical	SMGWSS_173	CDS	1226	7475	7475	1226	6.09706	504.735
171931	172821	-	891	dapA	SMGWSS_174	CDS	11415	24833	24833	11415	2.17547	1840.53
172885	173088	+	204	hypothetical	SMGWSS_175	CDS	2441	513	2441	513	4.75828	790.185
173285	173929	+	645	prfB	SMGWSS_176	CDS	52446	7474	52446	7474	7.01713	5369.62
173965	174690	+	726	dapB	SMGWSS_177	CDS	67830	3559	67830	3559	19.0587	6169.88
174717	176153	+	1437	lepB	SMGWSS_178	CDS	46991	3415	46991	3415	13.7602	2159.48
176150	176344	+	195	rpsU	SMGWSS_179	CDS	23112	248	23112	248	93.1935	7826.98
176356	177132	+	777	aroE	SMGWSS_180	CDS	15165	362	15165	362	41.8923	1288.88
177108	178091	-	984	GTP-binding_protein	SMGWSS_181	CDS	27221	8311	8311	27221	0.305316	557.763
178093	179490	-	1398	lpdA	SMGWSS_182	CDS	19364	28319	28319	19364	1.46246	1337.71
179520	179609	-	90	trnL	SMGWSS_183	RNA	2909	281	281	2909	0.0965968	206.184
179620	179997	-	378	hypothetical	SMGWSS_184	CDS	6899	752	752	6899	0.109001	131.376
180036	180109	+	74	trnM	SMGWSS_185	RNA	1630	33	1630	33	49.3939	1454.61
180132	182846	+	2715	sucA	SMGWSS_186	CDS	98361	8019	98361	8019	12.266	2392.46
182851	183996	+	1146	sucB	SMGWSS_187	CDS	90541	8271	90541	8271	10.9468	5217.37
184005	184760	+	756	tatC	SMGWSS_188	CDS	2118	919	2118	919	2.30468	185.01
184757	185197	-	441	smpB	SMGWSS_189	CDS	706	1187	1187	706	1.6813	177.747
185210	185527	+	318	hypothetical	SMGWSS_190	CDS	816	3538	816	3538	0.230639	169.455
185576	185998	+	423	hypothetical	SMGWSS_191	CDS	59698	4191	59698	4191	14.2443	9319.89
186137	187768	-	1632	groEL	SMGWSS_192	CDS	40341	1548150	1548150	40341	38.3766	62644.7
187777	188055	-	279	groS	SMGWSS_193	CDS	3251	164648	164648	3251	50.6453	38971.2
188293	189654	-	1362	miaB	SMGWSS_194	CDS	6239	20897	20897	6239	3.34941	1013.21
189724	191148	+	1425	sufB	SMGWSS_195	CDS	36504	6584	36504	6584	5.54435	1691.67
191168	191908	+	741	sufC	SMGWSS_196	CDS	18684	2585	18684	2585	7.22785	1665.11
191916	193217	+	1302	sufD	SMGWSS_197	CDS	5067	731	5067	731	6.9316	256.999
193221	194447	+	1227	sufS	SMGWSS_198	CDS	24507	5535	24507	5535	4.42764	1318.98
194458	196005	+	1548	infB	SMGWSS_199	CDS	52125	30530	52125	30530	1.70734	2223.65
196009	197079	-	1071	aroG/pheA	SMGWSS_200	CDS	6594	180937	180937	6594	27.4396	11156.5
197097	197918	-	822	pheA	SMGWSS_201	CDS	1084	30824	30824	1084	28.4354	2476.33
197872	198894	-	1023	asd	SMGWSS_202	CDS	4160	167761	167761	4160	40.3272	10829.5
198927	199166	-	240	rpsT	SMGWSS_203	CDS	373	11849	11849	373	31.7668	3260.33
199184	199255	-	72	trnE	SMGWSS_204	RNA	195	792	792	195	4.06154	726.414
199256	200497	-	1242	aroA	SMGWSS_205	CDS	1693	29225	29225	1693	17.2623	1553.9
200517	200855	-	339	rpsP	SMGWSS_206	CDS	1404	10494	10494	1404	7.47436	2044.24
200890	200960	-	71	trnQ	SMGWSS_207	RNA	699	1012	1012	699	1.44778	941.268
200973	202850	-	1878	gyrB	SMGWSS_208	CDS	4001	62998	62998	4001	15.7456	2215.25
202973	203611	-	639	gidB	SMGWSS_209	CDS	4646	2389	2389	4646	0.514206	246.892
203679	204836	+	1158	aspC	SMGWSS_210	CDS	24785	13177	24785	13177	1.88093	1413.42
204882	205157	+	276	rpmF	SMGWSS_211	CDS	6719	1722	6719	1722	3.90186	1607.63
205154	206131	-	978	acoB	SMGWSS_212	CDS	31461	52895	52895	31461	1.68129	3571.63
206791	207846	-	1056	rpoD	SMGWSS_213	CDS	5893	19330	19330	5893	3.28016	1208.81
207843	210029	-	2187	pnp	SMGWSS_214	CDS	15207	70595	70595	15207	4.64227	2131.65
210045	210281	-	237	rpsO	SMGWSS_215	CDS	613	1719	1719	613	2.80424	478.982
210291	211019	-	729	ubiE	SMGWSS_216	CDS	231	134	134	231	0.580087	12.1386
211120	211317	+	198	rpmE	SMGWSS_217	CDS	1188	112	1188	112	10.6071	396.226
211388	211783	+	396	rpsL	SMGWSS_218	CDS	22731	1433	22731	1433	15.8625	3790.66
211780	212244	+	465	rpsG	SMGWSS_219	CDS	23868	1153	23868	1153	20.7008	3389.65
212258	214339	+	2082	fusA	SMGWSS_220	CDS	113577	5731	113577	5731	19.818	3602.47
214359	214646	+	288	rpsJ	SMGWSS_221	CDS	13066	450	13066	450	29.0356	2996
214652	215272	+	621	rplC	SMGWSS_222	CDS	30124	804	30124	804	37.4677	3203.41
215269	215892	+	624	rplD	SMGWSS_223	CDS	16636	880	16636	880	18.9045	1760.58
215895	216125	+	231	hypothetical	SMGWSS_224	CDS	904	48	904	48	18.8333	258.433
216116	216931	+	816	rplB	SMGWSS_225	CDS	24800	1425	24800	1425	17.4035	2007.02
216939	217220	+	282	rpsS	SMGWSS_226	CDS	5454	240	5454	240	22.725	1277.2
217228	217632	+	405	rplV	SMGWSS_227	CDS	7331	746	7331	746	9.82708	1195.36
217622	218302	+	681	rpsC	SMGWSS_228	CDS	28392	1592	28392	1592	17.8342	2753.21
218321	218731	+	411	rplP	SMGWSS_229	CDS	25214	1115	25214	1115	22.6135	4051.27
218724	218978	+	255	rpsQ	SMGWSS_230	CDS	6415	121	6415	121	53.0165	1661.3
218982	219344	+	363	rplN	SMGWSS_231	CDS	21746	275	21746	275	79.0764	3956.07
219625	220185	+	561	rplE	SMGWSS_232	CDS	24279	499	24279	499	48.6553	2857.98
220178	220447	+	270	rpsN	SMGWSS_233	CDS	29200	833	29200	833	35.054	7141.84
220450	220851	+	402	rpsH	SMGWSS_234	CDS	24797	570	24797	570	43.5035	4073.47
220864	221412	+	549	rplF	SMGWSS_235	CDS	23724	1775	23724	1775	13.3656	2853.69
221419	221769	+	351	rplR	SMGWSS_236	CDS	18827	175	18827	175	107.583	3542.14
221782	222297	+	516	rpsE	SMGWSS_237	CDS	51990	2347	51990	2347	22.1517	6653.67
222330	222749	+	420	rplO	SMGWSS_238	CDS	10457	406	10457	406	25.7562	1644.18
222752	224053	+	1302	secY	SMGWSS_239	CDS	12037	826	12037	826	14.5726	610.518
224065	224280	+	216	infA	SMGWSS_240	CDS	16362	150	16362	150	109.08	5002.35
224282	224398	+	117	rpmJ	SMGWSS_241	CDS	9034	66	9034	66	136.879	5099.01
224398	224778	+	381	rpsM	SMGWSS_242	CDS	29656	210	29656	210	141.219	5140.19
224779	225165	+	387	rpsK	SMGWSS_243	CDS	57209	910	57209	910	62.867	9762.13
225178	225765	+	588	rpsD	SMGWSS_244	CDS	80202	1440	80202	1440	55.6958	9007.39
225798	226517	+	720	rpoA	SMGWSS_245	CDS	63872	2005	63872	2005	31.8564	5858.27
226495	226893	+	399	rplQ	SMGWSS_246	CDS	28412	3701	28412	3701	7.67684	4702.41
226860	227645	-	786	dapF	SMGWSS_247	CDS	24655	23443	23443	24655	0.950842	1969.62
227669	228571	+	903	mraW	SMGWSS_248	CDS	7120	33996	7120	33996	0.209436	520.695
228583	228915	-	333	rnpB	SMGWSS_266	CDS	12851	201071	201071	12851	15.6463	39874.6
228923	230164	-	1242	putA	SMGWSS_249	CDS	17289	23716	23716	17289	1.37174	1260.99
230211	230399	+	189	hypothetical	SMGWSS_250	CDS	205	87	205	87	2.35632	71.6281
230628	231731	-	1104	mutL	SMGWSS_251	CDS	4762	4879	4879	4762	1.02457	291.845
231763	233103	+	1341	argH	SMGWSS_252	CDS	40377	4590	40377	4590	8.79673	1988.37
233101	233174	-	74	trnR	SMGWSS_253	RNA	2865	87	87	2865	0.0303665	77.6388
233236	234234	+	999	acoA	SMGWSS_254	CDS	58357	5130	58357	5130	11.3756	3857.61
234246	235361	+	1116	aceF	SMGWSS_255	CDS	32865	2491	32865	2491	13.1935	1944.74
235344	236063	-	720	terC	SMGWSS_256	CDS	4472	5121	5121	4472	1.14513	469.692
236272	237276	+	1005	gapA	SMGWSS_257	CDS	183222	13951	183222	13951	13.1333	12039.3
237285	237710	-	426	hypothetical	SMGWSS_258	CDS	3051	170	170	3051	0.0557194	26.353
237799	238518	+	720	trmH	SMGWSS_259	CDS	3996	7442	3996	7442	0.536952	366.509
238522	239499	-	978	pheS	SMGWSS_260	CDS	9044	33000	33000	9044	3.64883	2228.26
239509	240774	-	1266	ilvA	SMGWSS_261	CDS	9300	84126	84126	9300	9.04581	4388.21
240849	241883	-	1035	ilvC	SMGWSS_262	CDS	11518	1141281	1141281	11518	99.0867	72818.8
241893	242144	-	252	ilvN	SMGWSS_263	CDS	119	14130	14130	119	118.739	3702.82
242149	243849	-	1701	ilvB	SMGWSS_264	CDS	9010	158616	158616	9010	17.6044	6157.92
243849	245525	-	1677	ilvD	SMGWSS_265	CDS	18290	142956	142956	18290	7.81607	5629.38

## Sheet: Baum_yellow_rep1
start	end	strand	length	gene	synonym	type	reads_fwd	reads_rev	sense_counts	anti_counts	diff_mag	tpm
197	1720	+	507	mqo	BCI_0001	CDS	8573	549	8573	549	15.6157	902.89
1921	2159	-	238	predicted_RNA	pRNA1	RNA	23	2398	2398	23	104.261	538
1933	5826	+	1297	purL	BCI_0002	CDS	15235	348	15235	348	43.7787	627.21
5880	6356	+	158	BCI_0003	BCI_0003	CDS	345	342	345	342	1.00877	116.593
6569	7822	+	417	glyA	BCI_0004	CDS	8839	349	8839	349	25.3266	1131.82
7855	8661	-	268	suhB	BCI_0005	CDS	170	5106	5106	170	30.0353	1017.32
8964	10118	+	384	iscS	BCI_0006	CDS	6714	151	6714	151	44.4636	933.599
10151	10585	+	144	ndk	BCI_0007	CDS	2538	72	2538	72	35.25	941.108
10933	12054	+	373	ispG	BCI_0008	CDS	66498	130	66498	130	511.523	9519.41
12077	13369	+	430	hisS	BCI_0009	CDS	9324	614	9324	614	15.1857	1157.83
13440	14615	+	391	yfgl	BCI_0010	CDS	3531	432	3531	432	8.17361	482.204
14634	16052	+	472	engA	BCI_0011	CDS	6044	1307	6044	1307	4.62433	683.743
16150	17811	+	553	pgi	BCI_0012	CDS	11573	263	11573	263	44.0038	1117.46
18124	19740	-	538	pckA	BCI_0013	CDS	509	2233	2233	509	4.38703	221.624
20049	20594	+	181	nudE	BCI_0014	CDS	1291	56	1291	56	23.0536	380.853
20778	21935	+	385	metK	BCI_0015	CDS	3449	144	3449	144	23.9514	478.347
21979	22887	-	302	metR	BCI_0016	CDS	735	943	943	735	1.28299	166.73
22990	25284	+	764	metE	BCI_0017	CDS	76134	253	76134	253	300.925	5321.03
25374	25569	-	195	predicted_RNA	pRNA2	RNA	21	1721	1721	21	81.9524	471.255
25559	27043	+	494	rmuc	BCI_0018	CDS	2539	556	2539	556	4.56655	274.439
27142	28062	-	306	metA	BCI_0019	CDS	312	522	522	312	1.67308	91.0876
28316	30781	-	821	plsB	BCI_0020	CDS	1908	5228	5228	1908	2.74004	340.019
30959	31975	-	338	trpS	BCI_0021	CDS	965	9272	9272	965	9.60829	1464.76
32055	32750	-	231	rpe	BCI_0022	CDS	616	5472	5472	616	8.88312	1264.87
32844	33923	-	359	aroB	BCI_0023	CDS	142	4188	4188	142	29.493	622.906
33928	34449	-	173	aroK	BCI_0024	CDS	26	2798	2798	26	107.615	863.598
34736	36097	-	453	pssA	BCI_0025	CDS	572	1093	1093	572	1.91084	128.834
36278	36928	-	216	dedA	BCI_0026	CDS	2528	926	926	2528	0.366297	228.911
37462	37825	-	363	Rnase P	pRNA3	RNA	184	237897	237897	184	1292.92	34993.9
38198	38455	+	85	bolA	BCI_0027	CDS	1261	26	1261	26	48.5	792.148
38523	39779	+	418	murA	BCI_0028	CDS	4823	246	4823	246	19.6057	616.1
39828	41210	-	460	degQ	BCI_0029	CDS	332	2881	2881	332	8.67771	334.423
41305	41712	-	135	hyp_1	BCI_0030	CDS	95	945	945	95	9.94737	373.773
41948	42376	+	142	rplM	BCI_0031	CDS	11382	62	11382	62	183.581	4279.97
42396	42794	+	132	rpsI	BCI_0032	CDS	10415	61	10415	61	170.738	4213.04
43254	43748	+	164	hyp_2	BCI_0033	CDS	299	22	299	22	13.5909	97.3503
44259	45017	+	253	hyp_3	gene	CDS	465	157	465	157	2.96178	98.1392
45160	46740	+	526	purH	BCI_0035	CDS	4642	402	4642	402	11.5473	471.226
46761	48035	+	424	purD	BCI_0036	CDS	7626	686	7626	686	11.1166	960.376
48145	48624	-	159	hsp	BCI_0037	CDS	59	67213	67213	59	1139.2	22571.8
48741	49643	-	300	hyp_4	BCI_0038	CDS	221	52080	52080	221	235.656	9269.58
49666	50199	-	177	nuc	BCI_0039	CDS	144	11112	11112	144	77.1667	3352.19
50301	50585	-	94	hup	BCI_0040	CDS	19	1841	1841	19	96.8947	1045.77
51328	53226	+	633	thiC	BCI_0041	CDS	2194	218	2194	218	10.0642	185.073
53213	53857	+	214	thiE	BCI_0042	CDS	796	107	796	107	7.43925	198.614
53850	54623	+	257	thiF	BCI_0043	CDS	1798	321	1798	321	5.60125	373.565
54623	54823	+	66	thiS	BCI_0044	CDS	638	6	638	6	106.333	516.163
54827	55606	+	259	thiG	BCI_0045	CDS	5905	68	5905	68	86.8382	1217.39
55603	56751	+	382	thiH	BCI_0046	CDS	2727	2315	2727	2315	1.17797	381.182
56812	57288	-	158	mreD	BCI_0047	CDS	40	1037	1037	40	25.925	350.455
57447	58313	-	288	mreC	BCI_0048	CDS	83	10479	10479	83	126.253	1942.84
58348	59391	-	347	mreB	BCI_0049	CDS	53	5997	5997	53	113.151	922.815
59747	60250	+	167	aroQ	BCI_0050	CDS	1552	85	1552	85	18.2588	496.233
60272	60724	+	150	accB	BCI_0051	CDS	1670	13	1670	13	128.462	594.477
60733	62082	+	449	accC	BCI_0052	CDS	4554	91	4554	91	50.044	541.573
62339	62974	-	211	marC	BCI_0053	CDS	968	747	747	968	0.771694	189.038
63371	65458	+	695	prlC	BCI_0054	CDS	3726	946	3726	946	3.93869	286.265
65455	67029	-	524	pitA	BCI_0055	CDS	239	1599	1599	239	6.69038	162.94
67592	68656	+	354	ftsY	BCI_0056	CDS	2842	109	2842	109	26.0734	428.678
68669	69310	+	213	ftsE	BCI_0057	CDS	2778	89	2778	89	31.2135	696.406
69330	70280	+	316	ftsX	BCI_0058	CDS	6833	424	6833	424	16.1156	1154.61
70343	71203	+	286	rpoH	BCI_0059	CDS	5820	32	5820	32	181.875	1086.59
71376	72095	+	239	fre	BCI_0060	CDS	4352	102	4352	102	42.6667	972.302
72230	73165	+	311	hemC	BCI_0061	CDS	4457	30	4457	30	148.567	765.231
73173	73913	+	246	hemD	BCI_0062	CDS	2676	225	2676	225	11.8933	580.846
73928	75448	-	506	lnt	BCI_0063	CDS	1797	1921	1921	1797	1.069	202.716
75494	75961	-	155	hyp_5	BCI_0064	CDS	24	2423	2423	24	100.958	834.703
76001	77356	-	451	miaB	BCI_0065	CDS	33	12599	12599	33	381.788	1491.66
77544	79559	-	671	ligA	BCI_0066	CDS	149	2911	2911	149	19.5369	231.649
79623	80432	-	269	zipA	BCI_0067	CDS	63	719	719	63	11.4127	142.721
80668	81633	+	321	cysK	BCI_0068	CDS	1556	42	1556	42	37.0476	258.83
81807	82064	+	85	ptsH	BCI_0069	CDS	757	1	757	1	757	475.54
82117	83832	+	571	ptsI	BCI_0070	CDS	3575	439	3575	439	8.14351	334.311
84144	84857	-	237	purC	BCI_0071	CDS	67	1209	1209	67	18.0448	272.388
85387	86463	+	358	purM	BCI_0072	CDS	11076	125	11076	125	88.608	1652
86454	87113	+	219	purN	BCI_0073	CDS	5727	351	5727	351	16.3162	1396.35
87324	89411	+	695	ppk	BCI_0074	CDS	1818	2011	1818	2011	0.904028	139.675
89439	91436	-	665	tktA	BCI_0075	CDS	152	18875	18875	152	124.178	1515.57
91457	92410	-	317	talB	BCI_0076	CDS	200	10989	10989	200	54.945	1851.01
92901	93731	+	276	cysT	BCI_0077	CDS	409	118	409	118	3.4661	79.1269
93740	94582	+	280	cysW	BCI_0078	CDS	509	258	509	258	1.97287	97.0666
94585	95718	+	377	cysA	BCI_0079	CDS	2445	322	2445	322	7.59317	346.296
95991	96179	+	62	rnfB	BCI_0080	CDS	134	167	134	167	0.802395	115.405
96281	97555	-	424	tyrS	BCI_0081	CDS	562	2661	2661	562	4.73488	335.111
97591	98241	-	216	pdxH	BCI_0082	CDS	39	4279	4279	39	109.718	1057.79
98475	98909	-	144	slyA	BCI_0083	CDS	60	5499	5499	60	91.65	2039.07
99001	99099	-	32	hyp_6	BCI_0084	CDS	1	40	40	1	40	66.7452
99313	99969	+	218	rnt	BCI_0085	CDS	3008	1827	3008	1827	1.64641	736.769
100009	100368	-	119	BCI_0086	BCI_0086	CDS	286	2083	2083	286	7.28322	934.657
100574	101197	-	207	ribE	BCI_0087	CDS	35	1570	1570	35	44.8571	404.985
101349	101425	+	77	Val_tRNA2	BCI_0088	RNA	1942	3	1942	3	647.333	1346.69
101593	101937	+	114	momp	BCI_0089	CDS	141269	270	141269	270	523.219	66168.6
102094	102165	-	72	Gln_tRNA	BCI_0090	RNA	70	411	411	70	5.87143	304.803
102178	102254	-	77	Met_tRNA	BCI_0091	RNA	25	1098	1098	25	43.92	761.416
102263	102336	-	74	Gln_tRNA_2	BCI_0092	RNA	4	766	766	4	191.5	552.723
102388	102473	-	86	Leu_tRNA1	BCI_0093	RNA	3	164	164	3	54.6667	101.825
102617	104287	+	556	glnS	BCI_0094	CDS	10673	222	10673	222	48.0766	1025
104379	104909	-	176	fldA	BCI_0095	CDS	78	2704	2704	78	34.6667	820.359
105072	105818	+	248	hyp_7	BCI_0096	CDS	1329	79	1329	79	16.8228	286.143
106173	107354	+	393	sucC	BCI_0097	CDS	2617	315	2617	315	8.30794	355.567
107342	108226	+	294	sucD	BCI_0098	CDS	3148	64	3148	64	49.1875	571.739
108228	109292	+	355	nc_21	nc_21	RNA	2687	796	2687	796	3.37563	404.156
109297	110598	+	434	tolB_gene	tolB_gene	CDS	14	2255	2255	14	161.071	277.439
109385	109607	-	222	predicted_RNA	pRNA4	RNA	317	2732	2732	317	8.6183	657.11
110638	111273	+	211	pal	BCI_0100	CDS	6434	44	6434	44	146.227	1628.2
111288	111935	+	215	hyp_8a	BCI_0101	CDS	9849	100	9849	100	98.49	2446.04
111993	113039	+	348	nadA	BCI_0102	CDS	15353	555	15353	555	27.6631	2355.72
112996	114456	-	486	tilS	BCI_0103	CDS	875	9805	9805	875	11.2057	1077.26
114465	116123	-	552	antiporter	BCI_0104	CDS	192	11114	11114	192	57.8854	1075.08
116503	117357	-	284	ABC_trans	BCI_0105	CDS	149	4187	4187	149	28.1007	787.218
117359	118201	-	280	troB	BCI_0106	CDS	92	15049	15049	92	163.576	2869.85
118286	118783	-	165	ssb	BCI_0107	CDS	112	15748	15748	112	140.607	5096.26
119426	120775	+	450	gltP_degen	gltP_degen	CDS	4689	278	4689	278	16.8669	556.388
121415	121840	+	141	BCI_0109	BCI_0109	CDS	16566	66	16566	66	251	6273.48
122087	122701	+	204	gmk	BCI_0110	CDS	4714	178	4714	178	26.4831	1233.87
122774	122971	+	65	rpoZ	BCI_0111	CDS	742	64	742	64	11.5938	609.538
123268	125367	+	699	recG	BCI_0112	CDS	7692	548	7692	548	14.0365	587.587
125425	126033	+	202	GTP-binding	BCI_0113	CDS	792	475	792	475	1.66737	209.355
126348	127268	-	306	polA	BCI_0114	CDS	393	2379	2379	393	6.05344	415.129
127464	128618	+	384	dnaX	BCI_0115	CDS	4961	371	4961	371	13.372	689.84
128893	129231	+	112	hyp_8	BCI_0116	CDS	1438	105	1438	105	13.6952	685.569
129409	131304	+	631	htpG	BCI_0117	CDS	7871	156	7871	156	50.4551	666.056
131401	132042	+	213	adk	BCI_0118	CDS	4690	1159	4690	1159	4.04659	1175.72
132045	133118	-	357	purK	BCI_0119	CDS	734	6803	6803	734	9.26839	1017.52
133115	133624	-	169	purE	BCI_0120	CDS	12	4685	4685	12	390.417	1480.24
134028	135416	+	462	cysS	BCI_0121	CDS	5125	258	5125	258	19.8643	592.328
135430	136287	-	285	folD	BCI_0122	CDS	78	12630	12630	78	161.923	2366.29
136485	136562	+	78	Arg_tRNA1	BCI_0123	RNA	120	68	120	68	1.76471	82.148
136685	137890	-	402	cyaA_degen	cyaA_degen	CDS	3254	262	3254	262	12.4198	432.217
137966	138790	+	274	dapF	BCI_0125	CDS	3429	458	3429	458	7.4869	668.232
138903	139619	+	238	BCI_0126	BCI_0126	CDS	2265	1038	2265	1038	2.18208	508.161
139475	139527	-	52	predicted_RNA	pRNA5	RNA	0	155	155	0	155	159.162
139674	141614	+	646	uvrD	BCI_0127	CDS	8341	998	8341	998	8.35772	689.439
142061	143011	+	316	corA	BCI_0128	CDS	8106	500	8106	500	16.212	1369.71
143038	143133	-	31	hyp_9	BCI_0129	CDS	200	102	102	200	0.51	175.691
143136	144143	+	335	hyp_10	BCI_0130	CDS	1235	2505	1235	2505	0.493014	196.849
144158	146566	-	802	gyrB	BCI_0131	CDS	137	17752	17752	137	129.577	1181.91
146724	147836	-	370	dnaN	BCI_0132	CDS	138	9520	9520	138	68.9855	1373.87
148605	148748	+	47	rpmH	BCI_0133	CDS	663	26	663	26	25.5	753.227
148760	149107	+	115	rnpA	BCI_0134	CDS	1032	125	1032	125	8.256	479.173
149083	149340	+	85	hyp_11	BCI_0135	CDS	1044	285	1044	285	3.66316	655.831
149236	149695	-	459	predicted_RNA	pRNA6	RNA	229	626	626	229	2.73362	72.8235
149343	150944	+	533	yidC	BCI_0136	CDS	3870	1700	3870	1700	2.27647	387.698
150941	152314	+	457	trmE	BCI_0137	CDS	2563	2609	2563	2609	0.982369	299.463
152320	154158	-	612	glmS	BCI_0138	CDS	271	14978	14978	271	55.2694	1306.81
154201	155610	-	469	glmU	BCI_0139	CDS	213	9687	9687	213	45.4789	1102.88
155664	156086	-	140	atpC	BCI_0140	CDS	6	2132	2132	6	355.333	813.147
156100	157473	-	457	atpD	BCI_0141	CDS	73	13159	13159	73	180.26	1537.51
157519	158382	-	287	atpG	BCI_0142	CDS	21	6504	6504	21	309.714	1210.07
158429	159970	-	513	atpA	BCI_0143	CDS	177	22835	22835	177	129.011	2376.81
159992	160525	-	177	atpH	BCI_0144	CDS	54	5190	5190	54	96.1111	1565.68
160548	161018	-	156	atpF	BCI_0145	CDS	14	4540	4540	14	324.286	1553.97
161047	161289	-	80	atpE	BCI_0146	CDS	29	1168	1168	29	40.2759	779.584
161326	162147	-	273	atpB	BCI_0147	CDS	155	1074	1074	155	6.92903	210.064
162235	164130	-	631	gidA	BCI_0148	CDS	1334	5938	5938	1334	4.45127	502.483
164177	165154	-	325	gcvT	BCI_0149	CDS	113	3763	3763	113	33.3009	618.246
165307	167034	+	575	recJ	BCI_0150	CDS	6055	77	6055	77	78.6364	562.285
167153	168076	+	308	prfB_degen	prfB_degen	CDS	1859	154	1859	154	12.0714	322.284
168085	169605	+	506	lysS	BCI_0152	CDS	3736	263	3736	263	14.2053	394.245
169659	170483	+	274	murI	BCI_0153	CDS	145	204	145	204	0.710784	28.2571
170754	172301	+	1548	rrsB	BCI_0509	CDS	0	0	0	0	0	0
172415	172487	+	73	Glu_tRNA	BCI_0508	RNA	0	0	0	0	0	0
172572	175473	+	2902	rrlB	BCI_0507	CDS	0	0	0	0	0	0
175506	175623	+	118	rrfB	BCI_0506	CDS	0	0	0	0	0	0
175644	175720	+	77	Asp_tRNA	BCI_0158	RNA	1	0	1	0	1	0.693457
175744	175820	+	77	Trp_tRNA	BCI_0159	RNA	33	3	33	3	11	22.8841
175857	177956	-	699	glyS	BCI_0160	CDS	1117	5778	5778	1117	5.17278	441.378
177962	178870	-	302	glyQ	BCI_0161	CDS	124	5513	5513	124	44.4597	974.745
179601	180509	-	302	metF	BCI_0162	CDS	90	308	308	90	3.42222	54.457
180690	181853	-	387	metB	BCI_0163	CDS	14	717	717	14	51.2143	98.9278
181866	182486	+	207	metJ_degen	metJ_degen	CDS	1102	641	1102	641	1.71919	284.264
182488	182766	-	92	rpmE	BCI_0165	CDS	33	2093	2093	33	63.4242	1214.76
182886	185000	+	704	priA	BCI_0166	CDS	4562	1777	4562	1777	2.56725	346.013
184682	184883	-	201	predicted_RNA	pRNA7	RNA	0	1358	1358	0	1358	360.756
185225	185767	+	180	hslV	BCI_0167	CDS	22569	22	22569	22	1025.86	6694.99
185771	187111	+	446	hslU	BCI_0168	CDS	20366	31	20366	31	656.968	2438.27
187374	188144	+	256	tpiA	BCI_0169	CDS	3889	158	3889	158	24.6139	811.163
188146	189135	-	329	BCI_0170	BCI_0170	CDS	551	2403	2403	551	4.36116	390.003
189206	190168	-	320	pfkA	BCI_0171	CDS	54	3330	3330	54	61.6667	555.654
190415	191230	-	271	cysE	BCI_0172	CDS	86	7320	7320	86	85.1163	1442.29
191281	192303	-	340	gpsA	BCI_0173	CDS	45	12427	12427	45	276.156	1951.63
192689	193120	-	143	BCI_0174	BCI_0174	CDS	27	3319	3319	27	122.926	1239.31
193227	194444	+	405	M23	BCI_0175	CDS	2700	532	2700	532	5.07519	355.974
194716	195207	+	163	coaD	BCI_0176	CDS	514	366	514	366	1.40437	168.378
195204	196013	-	269	mutM	BCI_0177	CDS	92	16066	16066	92	174.63	3189.08
196074	196241	-	55	rpmG	BCI_0178	CDS	6	3667	3667	6	611.167	3560.07
196291	196518	-	75	rpmB	BCI_0179	CDS	1	2451	2451	1	2451	1744.99
196617	197483	-	288	hyp_12	BCI_0180	CDS	277	6105	6105	277	22.0397	1131.89
197581	198222	+	213	pyrE	BCI_0181	CDS	766	532	766	532	1.43985	192.026
198277	198729	-	150	dut	BCI_0182	CDS	31	4954	4954	31	159.806	1763.5
198710	199924	-	404	dfp	BCI_0183	CDS	337	2991	2991	337	8.87537	395.317
200132	200208	-	77	Pro_tRNA1	BCI_0184	RNA	1	75	75	1	75	52.0093
200299	200387	-	89	Leu_tRNA2	BCI_0185	RNA	3	664	664	3	221.333	398.371
200410	200485	-	76	His_tRNA	BCI_0186	RNA	3	657	657	3	219	461.596
200503	200580	-	78	Arg_tRNA2	BCI_0187	RNA	0	1089	1089	0	1089	745.493
200830	202089	-	419	rho	BCI_0188	CDS	62	30512	30512	62	492.129	3888.36
202183	202509	-	108	trxA	BCI_0189	CDS	143	8428	8428	143	58.9371	4166.88
202633	202971	-	112	hyp_13	BCI_0190	CDS	442	2072	2072	442	4.68778	987.829
203304	204299	+	331	aroH	BCI_0191	CDS	616	90	616	90	6.84444	99.3717
204398	205093	-	231	hyp_14	BCI_0192	CDS	231	667	667	231	2.88745	154.179
205192	206151	+	319	rluD	BCI_0193	CDS	2356	177	2356	177	13.3107	394.362
206158	208878	+	862	clpB	BCI_0194	CDS	25093	525	25093	525	47.7962	1554.37
208875	209222	-	115	rplS	BCI_0195	CDS	259	1314	1314	259	5.07336	610.109
209239	209997	-	252	trmD	BCI_0196	CDS	95	17431	17431	95	183.484	3693.45
210022	210549	-	175	rimM	BCI_0197	CDS	16	13197	13197	16	824.812	4026.68
210539	210805	-	88	rpsP	BCI_0198	CDS	13	5812	5812	13	447.077	3526.57
210902	212251	-	449	ffh	BCI_0199	CDS	92	5917	5917	92	64.3152	703.664
212407	212532	+	41	hyp_15	BCI_0200	CDS	132	16	132	16	8.25	171.91
212553	214124	-	523	gshA	BCI_0201	CDS	1077	898	898	1077	0.833798	91.6822
214296	214372	-	77	Arg_tRNA3	BCI_0202	RNA	10	59	59	10	5.9	40.914
214380	214472	-	93	Ser_tRNA1	BCI_0203	RNA	0	184	184	0	184	105.644
214670	214855	-	61	csrA	BCI_0204	CDS	423	418	418	423	0.98818	365.895
215037	217691	-	884	alaS	BCI_0205	CDS	96	15130	15130	96	157.604	913.896
217939	219054	-	350	recA	BCI_0206	CDS	18	9007	9007	18	500.389	1374.11
219478	220260	+	260	BCI_0207	BCI_0207	CDS	1308	477	1308	477	2.74214	268.624
220287	220943	+	218	BCI_0208	BCI_0208	CDS	1612	107	1612	107	15.0654	394.838
221030	223597	+	855	mutS	BCI_0209	CDS	4423	431	4423	431	10.2622	276.224
223856	224332	-	158	ispF	BCI_0210	CDS	403	607	607	403	1.5062	205.136
224342	225067	-	241	ispD	BCI_0211	CDS	11	5774	5774	11	524.909	1279.29
225382	226005	-	207	cysC	BCI_0212	CDS	213	1054	1054	213	4.94836	271.882
226002	227444	-	480	cysN	BCI_0213	CDS	206	6179	6179	206	29.9951	687.365
227457	228365	-	302	cysD	BCI_0214	CDS	265	2166	2166	265	8.17358	382.967
228409	229797	-	462	cysG	BCI_0215	CDS	58	3655	3655	58	63.0172	422.431
229965	230702	-	245	cysH	BCI_0216	CDS	13	1455	1455	13	111.923	317.108
230716	232416	-	566	cysI	BCI_0217	CDS	54	2110	2110	54	39.0741	199.056
232416	234203	-	595	cysJ	BCI_0218	CDS	557	1852	1852	557	3.32496	166.201
234505	234894	+	129	BCI_0219	BCI_0219	CDS	1625	300	1625	300	5.41667	672.626
234917	235588	-	223	hyp_16	BCI_0220	CDS	684	2040	2040	684	2.98246	488.467
235629	236930	-	433	eno	BCI_0221	CDS	83	9000	9000	83	108.434	1109.85
236998	238629	-	543	pyrG	BCI_0222	CDS	101	10823	10823	101	107.158	1064.29
238738	239628	-	297	relA_degen	relA_degen	CDS	1063	853	853	1063	0.802446	153.357
239976	240665	+	229	pfs	BCI_0224	CDS	1561	5651	1561	5651	0.276234	363.98
240709	241056	-	115	hesB	BCI_0225	CDS	25	1530	1530	25	61.2	710.401
241062	242465	-	468	mrcB_degen	mrcB_degen	CDS	471	3437	3437	471	7.29724	392.142
242468	242923	+	151	dksA	BCI_0227	CDS	3344	15	3344	15	222.933	1182.5
243094	244482	+	463	pcnB	BCI_0228	CDS	3951	739	3951	739	5.34641	455.655
244508	245011	+	167	folK	BCI_0229	CDS	1666	111	1666	111	15.009	532.683
245068	245865	+	265	panB	BCI_0230	CDS	2719	108	2719	108	25.1759	547.865
245884	246741	+	285	panC	BCI_0231	CDS	1542	398	1542	398	3.87437	288.901
246940	249525	+	861	leuS	BCI_0232	CDS	7039	1445	7039	1445	4.87128	436.534
249742	250779	+	345	holA	BCI_0233	CDS	2212	574	2212	574	3.85366	342.355
250772	251425	+	217	nadD	BCI_0234	CDS	555	1514	555	1514	0.366579	136.566
251137	252035	-	898	predicted_RNA	pRNA8	RNA	17	7283	7283	17	428.412	433.056
251496	253361	+	621	mrdA	BCI_0235	CDS	3775	2702	3775	2702	1.39711	324.59
253375	254466	+	363	mrdB	BCI_0236	CDS	5339	315	5339	315	16.9492	785.35
254594	255277	+	227	lipB	BCI_0237	CDS	8534	106	8534	106	80.5094	2007.41
255313	256197	+	294	lipA	BCI_0238	CDS	4890	46	4890	46	106.304	888.12
256361	257662	+	411	mdtH	BCI_0239	CDS	1035	309	1035	309	3.34951	134.465
257862	258425	+	187	pgsA	BCI_0240	CDS	647	684	647	684	0.945906	184.745
258467	258541	+	75	Gly_tRNA2	BCI_0241	RNA	369	2	369	2	184.5	262.709
258685	258755	+	71	Cys_tRNA	BCI_0242	RNA	370	8	370	8	46.25	278.262
258769	258854	+	86	Leu_tRNA3	BCI_0243	RNA	373	21	373	21	17.7619	231.59
258950	259951	+	333	pgl	BCI_0244	CDS	2035	1978	2035	1978	1.02882	326.31
259963	261264	-	433	bioA	BCI_0245	CDS	560	215	215	560	0.383929	26.5131
261372	262400	+	342	bioB	BCI_0246	CDS	2033	192	2033	192	10.5885	317.411
262397	263575	+	392	bioF	BCI_0247	CDS	3761	1045	3761	1045	3.59904	512.304
263562	264323	+	253	bioC	BCI_0248	CDS	1414	18	1414	18	78.5556	298.428
264316	264993	+	225	bioD	BCI_0249	CDS	1594	84	1594	84	18.9762	378.282
265418	266218	+	253	BCI_0250	BCI_0250	CDS	1794	120	1794	120	14.95	378.627
266278	266991	+	237	gpmA	BCI_0251	CDS	2740	139	2740	139	19.7122	617.323
266998	268089	+	363	serC	BCI_0252	CDS	4619	319	4619	319	14.4796	679.441
268184	269470	+	428	aroA	BCI_0253	CDS	4259	278	4259	278	15.3201	531.342
269532	270209	+	225	cmk	BCI_0254	CDS	5090	23	5090	23	221.304	1207.94
270342	272018	+	558	rpsA	BCI_0255	CDS	42685	67	42685	67	637.09	4084.62
272214	272378	+	54	hyp_17	BCI_0256	CDS	1399	128	1399	128	10.9297	1383.36
272440	273111	-	223	dsbA	BCI_0257	CDS	773	1689	1689	773	2.18499	404.422
273459	274484	+	341	pyrB	BCI_0258	CDS	2362	1959	2362	1959	1.20572	369.859
274498	274968	+	156	pyrI	BCI_0259	CDS	1811	331	1811	331	5.4713	619.875
275014	275409	+	131	L-PSP	BCI_0260	CDS	2604	525	2604	525	4.96	1061.4
275505	275774	-	69	cspE	BCI_0261	CDS	37	25317	25317	37	684.243	19591.8
276002	276718	+	238	exsB	BCI_0262	CDS	8381	115	8381	115	72.8783	1880.31
276746	279100	-	784	lon	BCI_0263	CDS	1036	44457	44457	1036	42.9122	3027.85
279309	280574	-	421	clpX	BCI_0264	CDS	316	11930	11930	316	37.7532	1513.1
280711	281328	-	205	clpP	BCI_0265	CDS	161	13638	13638	161	84.7081	3552.28
281550	282860	-	436	tig	BCI_0266	CDS	306	3674	3674	306	12.0065	449.948
283346	284260	+	304	cyoA	BCI_0267	CDS	13534	76	13534	76	178.079	2377.18
284291	286288	+	665	cyoB	BCI_0268	CDS	18419	218	18419	218	84.4908	1478.95
286275	286886	+	203	cyoC	BCI_0269	CDS	2672	73	2672	73	36.6027	702.83
286891	287238	+	116	hypo_1	hypo_1	CDS	740	62	740	62	11.9355	340.631
287238	288104	+	288	cyoE	BCI_0270	CDS	2190	428	2190	428	5.11682	406.033
288133	289542	+	469	BCI_0271	BCI_0271	CDS	5963	239	5963	239	24.9498	678.894
289571	290440	+	289	panE	BCI_0272	CDS	1624	1026	1624	1026	1.58285	300.053
290454	290750	-	98	thiI	BCI_0273	CDS	201	1004	1004	201	4.99502	547.038
291134	292048	+	304	ispA	BCI_0274	CDS	3774	188	3774	188	20.0745	662.885
292057	293958	+	623	dxs	BCI_0275	CDS	6334	210	6334	210	30.1619	542.875
294028	295764	+	578	argS	BCI_0276	CDS	6660	535	6660	535	12.4486	615.257
295815	297341	-	508	mviN	BCI_0277	CDS	4541	3575	3575	4541	0.787272	375.77
297338	297778	-	146	acpS	BCI_0278	CDS	80	2709	2709	80	33.8625	990.755
297778	298509	-	243	pdxJ	BCI_0279	CDS	53	4971	4971	53	93.7925	1092.31
298643	299548	-	301	era	BCI_0280	CDS	195	4958	4958	195	25.4256	879.529
299551	300228	-	225	rnc	BCI_0281	CDS	67	2766	2766	67	41.2836	656.417
300268	301203	-	311	lepB	BCI_0282	CDS	281	2687	2687	281	9.56228	461.336
301212	303020	-	602	lepA	BCI_0283	CDS	43	23820	23820	43	553.953	2112.79
303208	303283	+	76	Thr_tRNA1	BCI_0284	RNA	65	415	65	415	0.156627	45.6678
303301	306174	-	957	valS	BCI_0285	CDS	1407	11197	11197	1407	7.95807	624.741
306184	306648	-	154	holC	BCI_0286	CDS	137	1606	1606	137	11.7226	556.846
306672	308174	-	500	pepA	BCI_0287	CDS	34	23520	23520	34	691.765	2511.76
308547	309401	+	284	nadE	BCI_0288	CDS	3301	91	3301	91	36.2747	620.637
309469	310314	-	281	hemK	BCI_0289	CDS	206	1496	1496	206	7.26214	284.273
310311	311411	-	366	prfA	BCI_0290	CDS	515	7148	7148	515	13.8796	1042.83
311719	312366	+	215	lolB	BCI_0291	CDS	5299	319	5299	319	16.6113	1316.03
312363	313238	+	291	ispE	BCI_0292	CDS	4869	314	4869	314	15.5064	893.423
313291	314229	+	312	prsA	BCI_0293	CDS	5175	242	5175	242	21.3843	885.658
314339	314920	+	193	pth	BCI_0294	CDS	1909	740	1909	740	2.57973	528.152
314970	316040	+	356	ychF	BCI_0295	CDS	4231	158	4231	158	26.7785	634.605
316118	316906	+	262	fabI	BCI_0296	CDS	4916	30	4916	30	163.867	1001.89
317059	318996	+	645	rnb	BCI_0297	CDS	7946	79	7946	79	100.582	657.808
319003	319752	-	249	pyrF	BCI_0298	CDS	409	994	994	409	2.43032	213.156
319787	320101	-	98	hyp_18	BCI_0299	CDS	30	707	707	30	23.5667	385.215
320418	321017	+	199	ribA	BCI_0300	CDS	174	117	174	117	1.48718	46.6881
321060	322034	-	324	cysB	BCI_0301	CDS	190	1107	1107	190	5.82632	182.437
322283	324856	-	857	topA	BCI_0302	CDS	931	7999	7999	931	8.59184	498.385
325306	326070	+	254	hyp_19	BCI_0303	CDS	466	330	466	330	1.41212	97.9631
326265	326567	+	100	hyp_20	BCI_0304	CDS	237	14	237	14	16.9286	126.549
326729	328180	+	483	cls	BCI_0305	CDS	763	213	763	213	3.58216	84.3505
328635	329045	+	136	hns	BCI_0306	CDS	1435	178	1435	178	8.0618	563.408
329091	329966	-	291	htpX	BCI_0307	CDS	1236	4711	4711	1236	3.81149	864.431
330171	330659	-	162	ftn	BCI_0308	CDS	101	2454	2454	101	24.297	808.853
330747	332225	-	492	zwf	BCI_0309	CDS	115	12662	12662	115	110.104	1374.19
332634	334097	+	483	pykA	BCI_0310	CDS	5011	32	5011	32	156.594	553.971
334517	335866	+	449	BCI_0311	BCI_0311	CDS	2076	180	2076	180	11.5333	246.883
336040	337047	-	335	ruvB	BCI_0312	CDS	184	2890	2890	184	15.7065	460.642
337056	337646	-	196	ruvA	BCI_0313	CDS	477	1333	1333	477	2.79455	363.148
337688	338209	-	173	ruvC	BCI_0314	CDS	845	1955	1955	845	2.31361	603.408
338703	340472	-	589	aspS	BCI_0315	CDS	397	6364	6364	397	16.0302	576.933
340697	341431	-	244	BCI_0316	BCI_0316	CDS	205	5678	5678	205	27.6976	1242.56
341666	341755	+	90	Ser_tRNA2	BCI_0317	RNA	344	67	344	67	5.13433	204.092
341775	343067	-	430	serS	BCI_0318	CDS	934	3831	3831	934	4.10171	475.723
343217	343843	-	208	lolA	BCI_0319	CDS	12	1060	1060	12	88.3333	272.115
343945	345972	-	666	ftsK	BCI_0320	CDS	395	1647	1647	395	4.16962	132.047
346139	347098	+	319	trxB	BCI_0321	CDS	2810	483	2810	483	5.81781	470.355
347213	347431	+	72	infA	BCI_0322	CDS	648	50	648	50	12.96	480.566
347607	348335	+	242	artP	BCI_0323	CDS	5319	227	5319	227	23.4317	1173.61
348356	349084	+	242	artI	BCI_0324	CDS	2844	123	2844	123	23.122	627.515
349081	349776	+	231	artQ	BCI_0325	CDS	2047	229	2047	229	8.93886	473.169
349798	350469	+	223	artM	BCI_0326	CDS	1588	89	1588	89	17.8427	380.238
350805	351116	+	103	rpsJ	BCI_0327	CDS	12514	19	12514	19	658.632	6487.38
351142	351780	+	212	rplC	BCI_0328	CDS	28045	112	28045	112	250.402	7063.66
351792	352397	+	201	rplD	BCI_0329	CDS	20655	69	20655	69	299.348	5487.05
352394	352696	+	100	rplW	BCI_0330	CDS	11561	129	11561	129	89.6202	6173.13
352716	353534	+	272	rplB	BCI_0331	CDS	37423	339	37423	339	110.392	7346.49
353556	353834	+	92	rpsS	BCI_0332	CDS	12317	7	12317	7	1759.57	7148.7
353865	354197	+	110	rplV	BCI_0333	CDS	16556	15	16556	15	1103.73	8036.61
354214	354915	+	233	rpsC	BCI_0334	CDS	40275	36	40275	36	1118.75	9229.75
354927	355340	+	137	rplP	BCI_0335	CDS	28776	21	28776	21	1370.29	11215.5
355337	355528	+	63	rpmC	BCI_0336	CDS	12933	4	12933	4	3233.25	10961.5
355521	355790	+	89	rpsQ	BCI_0337	CDS	22218	97	22218	97	229.052	13329.8
355831	356313	+	160	rplN	BCI_0338	CDS	3018	31	3018	31	97.3548	1007.19
356325	356639	+	104	rplX	BCI_0339	CDS	2883	3	2883	3	961	1480.2
356663	357208	+	181	rplE	BCI_0340	CDS	5451	23	5451	23	237	1608.08
357231	357536	+	101	rpsN	BCI_0341	CDS	4565	1	4565	1	4565	2413.4
357569	357967	+	132	rpsH	BCI_0342	CDS	4497	12	4497	12	374.75	1819.11
357982	358515	+	177	rp1F	BCI_0343	CDS	5716	114	5716	114	50.1404	1724.36
358529	358876	+	115	rplR	BCI_0344	CDS	4643	4	4643	4	1160.75	2155.81
358888	359391	+	167	rpsE	BCI_0345	CDS	5008	35	5008	35	143.086	1601.25
359395	359577	+	60	rpmD	BCI_0346	CDS	2080	11	2080	11	189.091	1851.07
359578	360009	+	143	rplO	BCI_0347	CDS	4417	8	4417	8	552.125	1649.31
360025	361359	+	444	secY	BCI_0348	CDS	13748	122	13748	122	112.689	1653.36
361397	361513	+	38	rpmJ	BCI_0349	CDS	1461	10	1461	10	146.1	2052.94
361539	361895	+	118	rpsM	BCI_0350	CDS	4977	7	4977	7	711	2252.14
361920	362309	+	129	rpsK	BCI_0351	CDS	4948	16	4948	16	309.25	2048.1
362356	362976	+	206	rpsD	BCI_0352	CDS	8230	112	8230	112	73.4821	2133.25
362997	363980	+	327	rpoA	BCI_0353	CDS	13812	1119	13812	1119	12.3432	2255.38
364044	364430	+	128	rplQ	BCI_0354	CDS	4297	312	4297	312	13.7724	1792.53
364453	364530	-	78	Thr_tRNA2	BCI_0355	RNA	119	229	229	119	1.92437	156.766
364558	364629	-	72	Gly_tRNA	BCI_0356	RNA	10	194	194	10	19.4	143.873
364646	364727	-	82	Tyr_tRNA	BCI_0357	RNA	2	369	369	2	184.5	240.283
364746	364818	-	73	Thr_tRNA	BCI_0358	RNA	7	140	140	7	20	102.404
365098	366036	+	312	coaA	BCI_0359	CDS	425	517	425	517	0.82205	72.7352
366098	367033	+	311	prmB	BCI_0360	CDS	2271	68	2271	68	33.3971	389.912
367048	368115	+	355	aroC	BCI_0361	CDS	2470	43	2470	43	57.4419	371.517
368366	369586	+	406	fabB	BCI_0362	CDS	5814	30	5814	30	193.8	764.644
369660	370790	+	376	pdxB	BCI_0363	CDS	7495	131	7495	131	57.2137	1064.37
370798	371601	+	267	truA	BCI_0364	CDS	4910	157	4910	157	31.2739	981.93
371713	372600	+	295	accD	BCI_0365	CDS	5839	255	5839	255	22.898	1056.88
372643	373923	+	426	folC	BCI_0366	CDS	2975	546	2975	546	5.44872	372.896
374317	374802	+	161	cvpA	BCI_0367	CDS	1059	20	1059	20	52.95	351.221
374842	376260	+	472	purF	BCI_0368	CDS	3632	160	3632	160	22.7	410.879
376380	377834	-	484	nuoN	BCI_0369	CDS	1278	1902	1902	1278	1.48826	209.834
377693	377763	+	70	predicted_RNA	pRNA9	RNA	165	0	165	0	165	125.862
377859	379382	-	507	nuoM	BCI_0370	CDS	1586	5148	5148	1586	3.2459	542.177
379358	379507	+	149	predicted_RNA	pRNA10	RNA	1182	1410	1182	1410	0.838298	423.586
379432	381297	-	621	nuoL	BCI_0371	CDS	1002	9508	9508	1002	9.48902	817.538
381294	381596	-	100	nuoK	BCI_0372	CDS	77	1547	1547	77	20.0909	826.039
381644	382141	-	165	nuoJ	BCI_0373	CDS	48	6903	6903	48	143.812	2233.9
382165	382707	-	180	nuoI	BCI_0374	CDS	63	6368	6368	63	101.079	1889.04
382731	383696	-	321	nuoH	BCI_0375	CDS	154	5535	5535	154	35.9416	920.71
383705	386434	-	909	nuoG	BCI_0376	CDS	697	21202	21202	697	30.4189	1245.44
386516	387850	-	444	nuoF	BCI_0377	CDS	10	10143	10143	10	1014.3	1219.81
387847	388350	-	167	nuoE	BCI_0378	CDS	19	3282	3282	19	172.737	1049.38
388353	390140	-	595	nuoCD	BCI_0379	CDS	452	12883	12883	452	28.5022	1156.14
390249	390923	-	224	nuoB	BCI_0380	CDS	88	10569	10569	88	120.102	2519.39
390987	391373	-	128	nuoA	BCI_0381	CDS	392	3870	3870	392	9.87245	1614.4
391621	392823	+	400	ackA	BCI_0382	CDS	5836	337	5836	337	17.3175	779.05
392877	395012	+	711	pta	BCI_0383	CDS	4100	5456	4100	5456	0.751466	307.91
395031	395297	-	88	BCI_0384	BCI_0384	CDS	160	2601	2601	160	16.2563	1578.22
395299	396429	-	376	nrdB	BCI_0385	CDS	123	10811	10811	123	87.8943	1535.28
396480	398762	-	760	nrdA	BCI_0386	CDS	270	15785	15785	270	58.463	1109.02
399298	401841	+	847	gyrA	BCI_0387	CDS	57742	501	57742	501	115.253	3640.14
402170	403297	+	375	ddlA	BCI_0388	CDS	11358	208	11358	208	54.6058	1617.26
403289	403362	-	74	Pro_tRNA	BCI_0389	RNA	68	66	66	68	0.970588	47.6236
403459	403743	-	94	rplY	BCI_0390	CDS	405	2393	2393	405	5.90864	1359.33
403876	404463	-	195	nlpC	BCI_0391	CDS	336	2038	2038	336	6.06548	558.058
404495	405373	-	292	nfo	BCI_0392	CDS	24	2474	2474	24	103.083	452.405
405526	407004	+	492	lysP	BCI_0393	CDS	3218	157	3218	157	20.4968	349.246
407148	407810	+	220	folE	BCI_0394	CDS	1291	520	1291	520	2.48269	313.338
407840	408421	-	193	dcd	BCI_0395	CDS	70	2490	2490	70	35.5714	688.894
408614	410257	+	547	metG	BCI_0396	CDS	11171	3751	11171	3751	2.97814	1090.47
410283	411689	-	468	gnd	BCI_0397	CDS	1089	6830	6830	1089	6.27181	779.265
411892	412515	-	207	hisI	BCI_0398	CDS	435	2938	2938	435	6.75402	757.865
412509	413285	-	258	hisF	BCI_0399	CDS	13	3395	3395	13	261.154	702.636
413267	414013	-	248	hisA	BCI_0400	CDS	20	3961	3961	20	198.05	852.832
414016	414609	-	197	hisH	BCI_0401	CDS	14	3078	3078	14	219.857	834.281
414606	415676	-	356	hisB	BCI_0402	CDS	36	5318	5318	36	147.722	797.643
415682	416764	-	360	hisC	BCI_0403	CDS	754	2990	2990	754	3.96552	443.485
416761	418074	-	437	hisD	BCI_0404	CDS	306	2367	2367	306	7.73529	289.219
418078	418977	-	299	hisG	BCI_0405	CDS	314	1957	1957	314	6.23248	349.486
419623	420252	+	209	BCI_0406	BCI_0406	CDS	5569	87	5569	87	64.0115	1422.79
420279	421469	-	396	aspC	BCI_0407	CDS	1637	1383	1383	1637	0.844838	186.482
421550	422953	-	467	asnC	BCI_0408	CDS	80	4171	4171	80	52.1375	476.907
423379	424389	+	336	pyrD	BCI_0409	CDS	17154	197	17154	197	87.0761	2726.07
424522	425043	-	173	fabA	BCI_0410	CDS	135	1020	1020	135	7.55556	314.821
425090	426844	-	584	hyp_21	BCI_0411	CDS	109	4463	4463	109	40.945	408.06
427111	427428	-	105	hspQ	BCI_0412	CDS	93	4392	4392	93	47.2258	2233.49
427534	428025	-	163	dsvC	BCI_0413	CDS	62	881	881	62	14.2097	288.601
428047	428131	+	85	Ser_tRNA	BCI_0414	RNA	271	4	271	4	67.75	170.24
428219	429154	-	311	fmt	BCI_0415	CDS	1388	2353	2353	1388	1.69524	403.991
429204	429707	-	167	def	BCI_0416	CDS	96	1332	1332	96	13.875	425.89
429939	430535	+	198	hyp_22	BCI_0417	CDS	3197	119	3197	119	26.8655	862.159
430619	431383	+	254	aroE	BCI_0418	CDS	1619	103	1619	103	15.7184	340.348
431428	434919	-	1163	BCI_0419	BCI_0419	CDS	1159	6676	6676	1159	5.76014	306.511
434949	436340	-	463	fumC	BCI_0420	CDS	482	2507	2507	482	5.20124	289.124
436947	437022	+	76	Asn_tRNA	BCI_0421	RNA	429	0	429	0	429	301.407
437173	438279	+	368	trmU	BCI_0422	CDS	12915	763	12915	763	16.9266	1873.94
438606	439997	+	463	purB	BCI_0423	CDS	6708	1165	6708	1165	5.75794	773.61
440033	441280	-	415	lolE	BCI_0424	CDS	323	3178	3178	323	9.83901	408.899
441277	441987	-	236	lolD	BCI_0425	CDS	189	1915	1915	189	10.1323	433.278
441980	443173	-	397	lolC	BCI_0426	CDS	146	3897	3897	146	26.6918	524.143
443281	443814	-	177	BCI_0427	BCI_0427	CDS	64	3309	3309	64	51.7031	998.237
443829	444194	-	121	BCI_0428	BCI_0428	CDS	11	1842	1842	11	167.455	812.857
444191	444991	-	266	BCI_0429	BCI_0429	CDS	990	4939	4939	990	4.98889	991.443
445036	446034	-	332	holB	BCI_0430	CDS	536	6028	6028	536	11.2463	969.494
446037	446675	-	212	tmk	BCI_0431	CDS	380	2163	2163	380	5.69211	544.792
446730	447533	-	267	pabC	BCI_0432	CDS	66	4217	4217	66	63.8939	843.34
447634	447867	-	77	acpP	BCI_0433	CDS	48	12805	12805	48	266.771	8879.71
448023	448757	-	244	fabG	BCI_0434	CDS	100	13928	13928	100	139.28	3047.96
448741	449703	-	320	fabD	BCI_0435	CDS	381	13602	13602	381	35.7008	2269.67
449723	450676	-	317	fabH	BCI_0436	CDS	36	21987	21987	36	610.75	3703.54
450723	450824	+	33	hyp_23	BCI_0437	CDS	1	294	1	294	0.00340136	1.61807
451081	451251	-	56	rpmF	BCI_0438	CDS	13	744	744	13	57.2308	709.406
451394	452362	-	322	rluC	BCI_0439	CDS	741	2079	2079	741	2.80567	344.754
452880	454649	+	589	rne	BCI_0440	CDS	1734	2721	1734	2721	0.637266	157.197
454097	455144	-	1047	predicted_RNA	pRNA11	RNA	29	34085	34085	29	1175.34	1738.31
455005	456099	+	364	pyrC	BCI_0441	CDS	573	201	573	201	2.85075	84.055
456215	458071	+	618	sppA	BCI_0442	CDS	12183	367	12183	367	33.1962	1052.63
458117	459187	+	356	gapA	BCI_0443	CDS	14938	55	14938	55	271.6	2240.54
459430	460125	+	231	minC	BCI_0444	CDS	18981	153	18981	153	124.059	4387.5
460142	460954	+	270	minD	BCI_0445	CDS	7252	14	7252	14	518	1434.18
460958	461239	+	93	minE	BCI_0446	CDS	2908	26	2908	26	111.846	1669.64
461260	461958	-	232	BCI_0447	BCI_0447	CDS	1528	1962	1962	1528	1.28403	451.566
462025	462972	-	315	BCI_0448	BCI_0448	CDS	179	8802	8802	179	49.1732	1492.04
463060	463899	-	279	BCI_0449	BCI_0449	CDS	57	9510	9510	57	166.842	1820.06
463921	464721	-	266	BCI_0450	BCI_0450	CDS	125	11694	11694	125	93.552	2347.42
464758	465726	-	322	BCI_0451	BCI_0451	CDS	71	12868	12868	71	181.239	2133.86
466225	467559	+	444	terC	BCI_0452	CDS	2615	228	2615	228	11.4693	314.484
467724	469082	-	452	pabB	BCI_0453	CDS	1157	1419	1419	1157	1.22645	167.631
469204	470178	+	324	BCI_0454	BCI_0454	CDS	1666	218	1666	218	7.6422	274.562
470183	470258	-	76	Ala_tRNA2	BCI_0455	RNA	20	73	73	20	3.65	51.2884
470279	471679	-	466	gltX	BCI_0456	CDS	683	4781	4781	683	7	547.826
471790	471862	+	73	Val_tRNA	BCI_0457	RNA	257	2	257	2	128.5	187.984
471901	471976	+	76	Lys_tRNA	BCI_0458	RNA	280	50	280	50	5.6	196.723
472023	473540	-	505	emrB	BCI_0459	CDS	2644	7181	7181	2644	2.71596	759.283
473575	474786	-	403	emrA	BCI_0460	CDS	170	18577	18577	170	109.276	2461.39
475083	475517	-	144	sufE	BCI_0461	CDS	47	1693	1693	47	36.0213	627.776
475533	476756	-	407	sufS	BCI_0462	CDS	166	10041	10041	166	60.488	1317.32
476753	478051	-	432	sufD	BCI_0463	CDS	754	5997	5997	754	7.95358	741.243
478032	478772	-	246	sufC	BCI_0464	CDS	61	4975	4975	61	81.5574	1079.86
478847	480322	-	491	sufB	BCI_0465	CDS	180	13523	13523	180	75.1278	1470.62
480337	480696	-	119	sufA	BCI_0466	CDS	2	3095	3095	2	1547.5	1388.75
480843	483227	-	794	pheT	BCI_0467	CDS	1649	6250	6250	1649	3.79018	420.31
483244	484227	-	327	pheS	BCI_0468	CDS	598	3796	3796	598	6.34783	619.853
484295	484657	-	120	rplT	BCI_0469	CDS	9	3251	3251	9	361.222	1446.59
484685	484882	-	65	rpmI	BCI_0470	CDS	3	3089	3089	3	1029.67	2537.55
484928	485443	-	171	infC	BCI_0471	CDS	42	8281	8281	42	197.167	2585.81
485475	487403	-	642	thrS	BCI_0472	CDS	493	10174	10174	493	20.6369	846.188
487653	488375	-	240	dnaQ	BCI_0473	CDS	55	280	280	55	5.09091	62.2955
488425	488886	+	153	rnhA	BCI_0474	CDS	738	101	738	101	7.30693	257.558
488971	489744	+	257	gloB	BCI_0475	CDS	754	71	754	71	10.6197	156.656
489766	490602	-	278	hyp_24	BCI_0476	CDS	2313	214	214	2313	0.0925205	41.1035
490684	491706	-	340	mltC	BCI_0477	CDS	696	727	727	696	1.04454	114.174
491812	492045	-	77	hyp_25	BCI_0478	CDS	40	104	104	40	2.6	72.1195
492130	493287	-	385	BCI_0479	BCI_0479	CDS	322	1172	1172	322	3.63975	162.546
493284	493691	-	408	gene	gene_2	CDS	54	905	905	54	16.7593	118.44
493691	494254	-	187	hyp_26	BCI_0481	CDS	61	4296	4296	61	70.4262	1226.68
494302	495255	-	317	gshB	BCI_0482	CDS	127	10926	10926	127	86.0315	1840.4
495314	495937	-	207	sodA	BCI_0483	CDS	194	15183	15183	194	78.2629	3916.49
495970	496542	-	190	yhgI	BCI_0484	CDS	551	5523	5523	551	10.0236	1552.14
496690	497451	+	253	bioH	BCI_0485	CDS	1828	92	1828	92	19.8696	385.803
497561	497634	+	74	Ile_tRNA	BCI_0486	RNA	237	0	237	0	237	171.012
497662	497734	+	73	Ala_tRNA	BCI_0487	RNA	577	0	577	0	577	422.049
497784	498227	+	147	BCI_0488	BCI_0488	CDS	2276	134	2276	134	16.9851	826.733
498343	498714	+	123	dsrE	BCI_0489	CDS	732	194	732	194	3.7732	317.772
498726	499085	+	119	dsrF	BCI_0490	CDS	845	348	845	348	2.42816	379.158
499095	499382	+	95	dsrH	BCI_0491	CDS	662	42	662	42	15.7619	372.087
499440	499814	+	124	rpsL	BCI_0492	CDS	1411	34	1411	34	41.5	607.597
499873	500343	+	156	rpsG	BCI_0493	CDS	2864	10	2864	10	286.4	980.299
500448	502565	+	705	fusA	BCI_0494	CDS	14273	88	14273	88	162.193	1081.03
502681	503865	+	394	tuf	BCI_0495	CDS	30593	115	30593	115	266.026	4146.06
503931	504314	+	127	secE	BCI_0496	CDS	4900	21	4900	21	233.333	2060.17
504315	504860	+	181	nusG	BCI_0497	CDS	12336	16	12336	16	771	3639.2
504916	505344	+	142	rplK	BCI_0498	CDS	8502	21	8502	21	404.857	3197
505348	506052	+	234	rplA	BCI_0499	CDS	13328	225	13328	225	59.2356	3041.3
506232	506732	+	166	rplJ	BCI_0500	CDS	12281	40	12281	40	307.025	3950.35
506768	507133	+	121	rplL	BCI_0501	CDS	7841	11	7841	11	712.818	3460.16
507307	511329	+	1340	rpoB	BCI_0502	CDS	30161	204	30161	204	147.848	1201.85
511418	515644	+	1408	rpoC	BCI_0503	CDS	46992	225	46992	225	208.853	1782.1
515662	516690	+	342	murB	BCI_0504	CDS	5618	246	5618	246	22.8374	877.134
516692	517540	+	282	birA	BCI_0505	CDS	1132	544	1132	544	2.08088	214.342
517580	517697	-	118	rrfA	BCI_0157	RNA	0	2	2	0	2	0.90502
517730	520631	-	2902	rrlA	BCI_0156	RNA	0	0	0	0	0	0
520716	520788	-	73	Glu_tRNA2	BCI_0155	RNA	0	0	0	0	0	0
520902	522449	-	1548	rrsA	BCI_0154	RNA	0	0	0	0	0	0
522858	524270	-	470	lpdA	BCI_0510	CDS	76	5188	5188	76	68.2632	589.403
524329	525618	-	358	aceF	BCI_0511	CDS	131	1232	1232	131	9.40458	183.754
525629	528298	-	889	aceE	BCI_0512	CDS	214	5345	5345	214	24.9766	321.038
528653	529540	+	295	nadC	BCI_0513	CDS	1002	121	1002	121	8.28099	181.366
529591	530202	+	203	coaE	BCI_0514	CDS	355	5	355	5	71	93.3775
530326	532893	-	856	secA_degen	secA_degen	CDS	5	1049	1049	5	209.8	65.4353
533136	533657	+	173	hyp_27	BCI_0516	CDS	446	559	446	559	0.797853	137.657
533781	534953	-	390	ftsZ	BCI_0517	CDS	114	4452	4452	114	39.0526	609.538
535265	536737	-	490	murC	BCI_0518	CDS	167	4729	4729	167	28.3174	515.328
536809	537885	-	358	murG	BCI_0519	CDS	6	10437	10437	6	1739.5	1556.69
538203	539543	-	446	murD	BCI_0520	CDS	1066	13682	13682	1066	12.8349	1638.04
539545	540627	-	360	mraY	BCI_0521	CDS	605	11174	11174	605	18.4694	1657.36
540621	541982	-	453	murF	BCI_0522	CDS	686	5333	5333	686	7.77405	628.613
541985	543472	-	495	murE	BCI_0523	CDS	316	7424	7424	316	23.4937	800.835
543659	544612	-	317	mraW	BCI_0524	CDS	105	3635	3635	105	34.619	612.287
544713	545579	-	288	queF	BCI_0525	CDS	1014	1981	1981	1014	1.95365	367.284
545764	546558	-	264	map	BCI_0526	CDS	63	2207	2207	63	35.0317	446.384
546863	547561	+	232	rpsB	BCI_0527	CDS	4716	77	4716	77	61.2468	1085.42
547604	548446	+	280	tsf	BCI_0528	CDS	5692	46	5692	46	123.739	1085.47
548506	549255	+	249	pyrH	BCI_0529	CDS	4714	26	4714	26	181.308	1010.88
549304	549861	+	185	frr	BCI_0530	CDS	4023	201	4023	201	20.0149	1161.15
550015	551211	+	398	dxr	BCI_0531	CDS	2517	456	2517	456	5.51974	337.684
550898	551238	-	340	predicted_RNA	pRNA12	RNA	12	408	408	12	34	64.0754
551341	552102	+	253	uppS	BCI_0532	CDS	1342	39	1342	39	34.4103	283.232
552112	552966	+	284	cdsA	BCI_0533	CDS	1553	354	1553	354	4.38701	291.987
552986	554365	+	459	cdsA	BCI_0534	CDS	5259	377	5259	377	13.9496	611.788
554370	556751	+	793	ecfE	BCI_0535	CDS	5026	1903	5026	1903	2.64109	338.423
556830	557327	+	165	ompH	BCI_0536	CDS	9736	18	9736	18	540.889	3150.7
557583	558032	+	149	fabZ	BCI_0537	CDS	2138	92	2138	92	23.2391	766.181
558257	561748	+	1163	dnaE	BCI_0538	CDS	15893	588	15893	588	27.0289	729.687
561765	562724	+	319	accA	BCI_0539	CDS	4573	70	4573	70	65.3286	765.457
562746	563936	-	396	metC	BCI_0540	CDS	118	25891	25891	118	219.415	3491.11
564244	564918	+	224	mutH	BCI_0541	CDS	1568	287	1568	287	5.46341	373.773
564708	564858	-	150	predicted_RNA	pRNA13	RNA	0	371	371	0	371	132.067
565076	565555	+	159	nudH	BCI_0542	CDS	1245	94	1245	94	13.2447	418.102
565763	566620	+	285	lgt	BCI_0543	CDS	1729	35	1729	35	49.4	323.937
566651	567445	+	264	thyA	BCI_0544	CDS	3998	876	3998	876	4.56393	808.628
567517	570813	+	1098	recC	BCI_0545	CDS	6739	1098	6739	1098	6.13752	327.72
570857	574408	+	1183	recB	BCI_0546	CDS	6702	4633	6702	4633	1.44658	302.503
573560	574082	-	522	predicted_RNA	pRNA14	RNA	0	823	823	0	823	84.1859
574133	574356	-	223	predicted_RNA	pRNA15	RNA	356	1486	1486	356	4.17416	355.815
574456	576315	+	619	recD	BCI_0547	CDS	768	807	768	807	0.951673	66.2492
574699	574964	-	265	predicted_RNA	pRNA16	RNA	0	1247	1247	0	1247	251.264
576514	577146	+	210	crp	BCI_0548	CDS	3713	16	3713	16	232.062	944.095
577230	577820	-	196	pabA	BCI_0549	CDS	266	476	476	266	1.78947	129.676
577980	579392	+	470	dnaB	BCI_0550	CDS	2786	245	2786	245	11.3714	316.514
579471	579543	+	73	Arg_tRNA	BCI_0551	RNA	17	61	17	61	0.278689	12.4347
579809	581704	+	631	dnaK	BCI_0552	CDS	15816	92	15816	92	171.913	1338.37
581803	582921	+	372	dnaJ	BCI_0553	CDS	5323	312	5323	312	17.0609	764.053
582954	583217	-	87	rpsT	BCI_0554	CDS	647	2291	2291	647	3.54096	1406.1
583427	584410	+	327	ribF	BCI_0555	CDS	4421	128	4421	128	34.5391	721.91
584422	587238	+	938	ileS	BCI_0556	CDS	19376	611	19376	611	31.7119	1102.99
587238	587741	+	167	lspA	BCI_0557	CDS	5402	99	5402	99	54.5657	1727.22
587770	588711	+	313	ispH	BCI_0558	CDS	18806	59	18806	59	318.746	3208.21
588861	590006	+	381	carA	BCI_0559	CDS	6914	243	6914	243	28.4527	968.979
590025	593264	+	1079	carB	BCI_0560	CDS	18277	353	18277	353	51.7762	904.469
593307	593804	+	165	folA	BCI_0561	CDS	396	934	396	934	0.423983	128.151
593806	594672	-	288	apaH	BCI_0562	CDS	96	3717	3717	96	38.7188	689.144
594902	595717	-	271	ksgA	BCI_0563	CDS	2008	646	646	2008	0.321713	127.284
595710	596714	-	334	pdxA	BCI_0564	CDS	117	3767	3767	117	32.1966	602.226
596701	598002	-	433	surA	BCI_0565	CDS	160	4610	4610	160	28.8125	568.49
598051	598383	+	110	smpA	BCI_0566	CDS	418	340	418	340	1.22941	202.905
598411	598740	-	109	hyp_28	BCI_0567	CDS	835	1350	1350	835	1.61677	661.329
598916	599401	+	161	smpB	BCI_0568	CDS	10389	13	10389	13	799.154	3445.55
599480	599854	+	375	sRNA	BCI_0569	RNA	733090	947	733090	947	774.118	104385
599882	600625	-	247	cysQ	BCI_0570	CDS	1130	5094	5094	1130	4.50796	1101.22
600646	601098	-	150	rplI	BCI_0571	CDS	54	4481	4481	54	82.9815	1595.12
601184	601411	-	75	rpsR	BCI_0572	CDS	25	1660	1660	25	66.4	1181.84
601415	601768	-	117	priN	BCI_0573	CDS	14	2403	2403	14	171.643	1096.68
601772	602149	-	125	rpsF	BCI_0574	CDS	24	2286	2286	24	95.25	976.509
602303	603049	-	248	BCI_0575	BCI_0575	CDS	54	1799	1799	54	33.3148	387.338
603138	605387	-	749	rnr	BCI_0576	CDS	149	5892	5892	149	39.5436	420.04
605490	606788	-	432	purA	BCI_0577	CDS	168	6977	6977	168	41.5298	862.373
606892	607893	-	333	hflC	BCI_0578	CDS	23	7132	7132	23	310.087	1143.61
607900	609060	-	386	hflK	BCI_0579	CDS	22	6199	6199	22	281.773	857.52
609103	610386	-	427	hflX	BCI_0580	CDS	54	5780	5780	54	107.037	722.787
610494	610754	-	86	hfq	BCI_0581	CDS	62	918	918	62	14.8065	569.973
610770	611036	+	88	hyp_29	BCI_0582	CDS	9	851	9	851	0.0105758	5.46097
611067	611996	-	309	miaA	BCI_0583	CDS	54	770	770	54	14.2593	133.058
612006	613814	-	602	mutL	BCI_0584	CDS	836	4518	4518	836	5.40431	400.737
613891	615108	-	382	BCI_0585	BCI_0585	CDS	457	3709	3709	457	8.11597	518.446
615477	616031	-	184	orn	BCI_0586	CDS	388	21621	21621	388	55.7242	6274.34
616407	617285	+	292	psd	BCI_0587	CDS	1273	1163	1273	1163	1.09458	232.785
617561	618544	-	327	genX	BCI_0588	CDS	406	5691	5691	406	14.0172	929.289
618632	619201	-	189	efp	BCI_0589	CDS	89	2425	2425	89	27.2472	685.11
619235	620254	+	339	yodO	BCI_0590	CDS	1447	2225	1447	2225	0.650337	227.918
620344	621984	-	546	groEL	BCI_0591	CDS	60	142797	142797	60	2379.95	13964.9
622026	622319	-	97	groES	BCI_0592	CDS	30	20301	20301	30	676.7	11175.2
622572	623990	+	472	aspA	BCI_0593	CDS	19979	89	19979	89	224.483	2260.17
624068	624140	+	73	Phe_tRNA	BCI_0594	RNA	216	6	216	6	36	157.994
624393	624995	-	200	BCI_0595	BCI_0595	CDS	75	13231	13231	75	176.413	3532.42
625182	626243	+	353	queA	BCI_0596	CDS	6765	2524	6765	2524	2.68027	1023.3
626305	627417	+	370	tgt	BCI_0597	CDS	6230	221	6230	221	28.19	899.076
627439	627771	+	110	yajC	BCI_0598	CDS	1999	23	1999	23	86.913	970.354
627805	629643	+	612	secD	BCI_0599	CDS	13485	434	13485	434	31.0714	1176.55
629654	630574	+	306	secF	BCI_0600	CDS	6243	234	6243	234	26.6795	1089.39
630832	631986	+	378	ribD	BCI_0601	CDS	9838	1270	9838	1270	7.74646	1389.71
632056	632574	+	172	ribH	BCI_0602	CDS	3195	30	3195	30	106.5	991.865
632601	633020	+	139	nusB	BCI_0603	CDS	3436	34	3436	34	101.059	1319.92
633102	634079	+	325	thiL	BCI_0604	CDS	4909	131	4909	131	37.4733	806.529
634087	634593	+	168	pgpA	BCI_0605	CDS	3539	78	3539	78	45.3718	1124.82
634648	636423	+	591	OMP85_b	BCI_0606	CDS	14066	616	14066	616	22.8344	1270.85
636420	639368	+	982	hyp_30	BCI_0607	CDS	14436	1080	14436	1080	13.3667	784.956
639384	639917	-	177	ppa	BCI_0608	CDS	453	1337	1337	453	2.95143	403.337
640077	641750	-	557	proS	BCI_0609	CDS	118	8429	8429	118	71.4322	808.037
641839	641924	-	86	Leu_tRNA	BCI_0610	RNA	2	403	403	2	201.5	250.217
642053	642958	-	301	nadK	BCI_0611	CDS	162	619	619	162	3.82099	109.808
643042	643638	+	198	grpE	BCI_0612	CDS	3995	66	3995	66	60.5303	1077.36
643689	644357	-	222	ung	BCI_0613	CDS	211	1837	1837	211	8.70616	441.841
644411	646060	-	549	nadB	BCI_0614	CDS	1866	1010	1010	1866	0.541265	98.2334
644625	645026	+	401	predicted_RNA	pRNA17	RNA	3739	0	3739	0	3739	497.876
646228	646303	-	76	Met_tRNA1	BCI_0615	RNA	16	114	114	16	7.125	80.0943
646370	648208	-	612	rpoD	BCI_0616	CDS	388	25407	25407	388	65.482	2216.73
648290	650077	-	595	dnaG	BCI_0617	CDS	342	6826	6826	342	19.9591	612.575
650171	650440	-	71	rpsU	BCI_0618	CDS	194	1646	1646	194	8.48454	1237.89
650587	651612	+	341	gcp	BCI_0619	CDS	6483	28	6483	28	231.536	1015.15
651654	652019	+	121	folB	BCI_0620	CDS	1239	11	1239	11	112.636	546.759
652158	652985	+	275	BCI_0621	BCI_0621	CDS	3149	505	3149	505	6.23564	611.435
653051	654289	-	412	cca	BCI_0622	CDS	2826	15149	15149	2826	5.36058	1963.35
655168	655803	+	211	ribB	BCI_0623	CDS	775	130	775	130	5.96154	196.123
655968	656717	-	249	plsC	BCI_0624	CDS	286	1697	1697	286	5.93357	363.909
656963	657370	-	135	holD	BCI_0625	CDS	1263	38	38	1263	0.0300871	15.03
657007	657212	+	205	predicted_RNA	pRNA18	RNA	595	69	595	69	8.62319	154.979
657363	659153	-	591	deaD	BCI_0626	CDS	218	6763	6763	218	31.0229	611.029
659552	661645	-	697	pnp	BCI_0627	CDS	345	30524	30524	345	88.4754	2338.4
661756	662061	-	101	rpsO	BCI_0628	CDS	31	9624	9624	31	310.452	5087.97
662146	663099	-	317	truB	BCI_0629	CDS	125	2692	2692	125	21.536	453.446
663102	663506	-	134	rbfA	BCI_0630	CDS	248	1330	1330	248	5.3629	529.977
663575	666217	-	880	infB	BCI_0631	CDS	385	16850	16850	385	43.7662	1022.42
666244	667731	-	495	nusA	BCI_0632	CDS	49	7575	7575	49	154.592	817.123
667937	668013	-	77	Met_tRNA2	BCI_0633	RNA	0	1013	1013	0	1013	702.472
668074	668164	-	91	Leu_tRNA4	BCI_0634	RNA	1	808	808	1	808	474.111
668231	668509	-	92	secG	BCI_0635	CDS	55	3696	3696	55	67.2	2145.13
668611	669948	-	445	glmM	BCI_0636	CDS	44	5401	5401	44	122.75	648.074
669945	670811	-	288	folP	BCI_0637	CDS	244	5404	5404	244	22.1475	1001.92
670920	672803	-	627	ftsH	BCI_0638	CDS	285	14363	14363	285	50.3965	1223.17
672862	673491	-	209	rrmJ	BCI_0639	CDS	108	5529	5529	108	51.1944	1412.57
673768	674244	-	158	greA	BCI_0640	CDS	34	5304	5304	34	156	1792.49
674447	675874	+	475	dacB	BCI_0641	CDS	3282	4039	3282	4039	0.812577	368.939
675884	676894	-	336	obgE	BCI_0642	CDS	94	9195	9195	94	97.8191	1461.24
676946	677200	-	84	rpmA	BCI_0643	CDS	19	3960	3960	19	208.421	2517.25
677215	677526	-	103	rplU	BCI_0644	CDS	26	5185	5185	26	199.423	2687.95
677988	679151	+	387	pgk	BCI_0645	CDS	2929	676	2929	676	4.33284	404.128
679230	680306	+	358	fbaA	BCI_0646	CDS	3040	162	3040	162	18.7654	453.42
680448	681119	+	223	rpiA	BCI_0647	CDS	2500	323	2500	323	7.73994	598.612
681172	681780	-	202	BCI_0648	BCI_0648	CDS	208	1158	1158	208	5.56731	306.103
681939	682742	-	267	thiD	BCI_0649	CDS	182	7121	7121	182	39.1264	1424.1
682912	684492	-	526	guaA	BCI_0650	CDS	495	16605	16605	495	33.5455	1685.63
684542	685999	-	485	guaB	BCI_0651	CDS	78	22469	22469	78	288.064	2473.73

## Sheet: Baum_red_rep1
start	end	strand	length	gene	synonym	type	reads_fwd	reads_rev	sense_counts	anti_counts	diff_mag	tpm
197	1720	+	507	mqo	BCI_0001	CDS	67859	6530	67859	6530	10.3919	1154.89
1921	2159	-	238	predicted_RNA	pRNA1	RNA	213	16050	16050	213	75.3521	581.888
1933	5826	+	1297	purL	BCI_0002	CDS	111618	2535	111618	2535	44.0308	742.567
5880	6356	+	158	BCI_0003	BCI_0003	CDS	3066	3372	3066	3372	0.909253	167.439
6569	7822	+	417	glyA	BCI_0004	CDS	134113	3667	134113	3667	36.5729	2775.08
7855	8661	-	268	suhB	BCI_0005	CDS	4537	25961	25961	4537	5.72206	835.849
8964	10118	+	384	iscS	BCI_0006	CDS	31385	1958	31385	1958	16.0291	705.232
10151	10585	+	144	ndk	BCI_0007	CDS	13566	511	13566	511	26.5479	812.888
10933	12054	+	373	ispG	BCI_0008	CDS	348195	1797	348195	1797	193.765	8054.8
12077	13369	+	430	hisS	BCI_0009	CDS	65035	6329	65035	6329	10.2757	1305.03
13440	14615	+	391	yfgl	BCI_0010	CDS	26617	8849	26617	8849	3.00791	587.386
14634	16052	+	472	engA	BCI_0011	CDS	46835	8311	46835	8311	5.6353	856.189
16150	17811	+	553	pgi	BCI_0012	CDS	72496	4070	72496	4070	17.8123	1131.18
18124	19740	-	538	pckA	BCI_0013	CDS	4822	53417	53417	4822	11.0778	856.719
20049	20594	+	181	nudE	BCI_0014	CDS	9638	1163	9638	1163	8.28719	459.462
20778	21935	+	385	metK	BCI_0015	CDS	49395	1242	49395	1242	39.7705	1107.04
21979	22887	-	302	metR	BCI_0016	CDS	5716	8319	8319	5716	1.45539	237.687
22990	25284	+	764	metE	BCI_0017	CDS	484602	4140	484602	4140	117.054	5473.1
25374	25569	-	195	predicted_RNA	pRNA2	RNA	429	11714	11714	429	27.3054	518.336
25559	27043	+	494	rmuc	BCI_0018	CDS	30230	3715	30230	3715	8.13728	528.022
27142	28062	-	306	metA	BCI_0019	CDS	5515	8023	8023	5515	1.45476	226.233
28316	30781	-	821	plsB	BCI_0020	CDS	15602	35478	35478	15602	2.27394	372.87
30959	31975	-	338	trpS	BCI_0021	CDS	9156	66074	66074	9156	7.21647	1686.77
32055	32750	-	231	rpe	BCI_0022	CDS	4599	45275	45275	4599	9.84453	1691.17
32844	33923	-	359	aroB	BCI_0023	CDS	1939	28900	28900	1939	14.9046	694.616
33928	34449	-	173	aroK	BCI_0024	CDS	321	14710	14710	321	45.8255	733.682
34736	36097	-	453	pssA	BCI_0025	CDS	5346	23052	23052	5346	4.31201	439.088
36278	36928	-	216	dedA	BCI_0026	CDS	23774	23401	23401	23774	0.984311	934.807
37462	37825	-	363	Rnase P	pRNA3	RNA	2841	1658395	1658395	2841	583.736	39420.5
38198	38455	+	85	bolA	BCI_0027	CDS	14689	394	14689	394	37.2817	1491.13
38523	39779	+	418	murA	BCI_0028	CDS	67175	2598	67175	2598	25.8564	1386.67
39828	41210	-	460	degQ	BCI_0029	CDS	6130	18510	18510	6130	3.01958	347.208
41305	41712	-	135	hyp_1	BCI_0030	CDS	991	5729	5729	991	5.78103	366.173
41948	42376	+	142	rplM	BCI_0031	CDS	73807	824	73807	824	89.5716	4484.88
42396	42794	+	132	rpsI	BCI_0032	CDS	76508	874	76508	874	87.5378	5001.2
43254	43748	+	164	hyp_2	BCI_0033	CDS	2098	240	2098	240	8.74167	110.383
44259	45017	+	253	hyp_3	gene	CDS	75271	1440	75271	1440	52.2715	2567.13
45160	46740	+	526	purH	BCI_0035	CDS	114549	3470	114549	3470	33.0112	1879.09
46761	48035	+	424	purD	BCI_0036	CDS	115350	5990	115350	5990	19.2571	2347.43
48145	48624	-	159	hsp	BCI_0037	CDS	1001	266033	266033	1001	265.767	14437.1
48741	49643	-	300	hyp_4	BCI_0038	CDS	3131	257044	257044	3131	82.0965	7393.11
49666	50199	-	177	nuc	BCI_0039	CDS	1711	61542	61542	1711	35.9684	3000.13
50301	50585	-	94	hup	BCI_0040	CDS	295	16430	16430	295	55.6949	1508.17
51328	53226	+	633	thiC	BCI_0041	CDS	365143	2965	365143	2965	123.151	4977.38
53213	53857	+	214	thiE	BCI_0042	CDS	90668	1944	90668	1944	46.6399	3655.79
53850	54623	+	257	thiF	BCI_0043	CDS	109312	1411	109312	1411	77.4713	3670.08
54623	54823	+	66	thiS	BCI_0044	CDS	30554	91	30554	91	335.758	3994.53
54827	55606	+	259	thiG	BCI_0045	CDS	142191	1258	142191	1258	113.029	4737.11
55603	56751	+	382	thiH	BCI_0046	CDS	57967	18317	57967	18317	3.16466	1309.36
56812	57288	-	158	mreD	BCI_0047	CDS	966	10618	10618	966	10.9917	579.865
57447	58313	-	288	mreC	BCI_0048	CDS	792	77047	77047	792	97.2816	2308.36
58348	59391	-	347	mreB	BCI_0049	CDS	528	38555	38555	528	73.0208	958.721
59747	60250	+	167	aroQ	BCI_0050	CDS	8892	712	8892	712	12.4888	459.435
60272	60724	+	150	accB	BCI_0051	CDS	10907	127	10907	127	85.8819	627.415
60733	62082	+	449	accC	BCI_0052	CDS	33579	1417	33579	1417	23.6972	645.301
62339	62974	-	211	marC	BCI_0053	CDS	7752	7032	7032	7752	0.907121	287.566
63371	65458	+	695	prlC	BCI_0054	CDS	21979	7255	21979	7255	3.0295	272.875
65455	67029	-	524	pitA	BCI_0055	CDS	2056	10983	10983	2056	5.34193	180.855
67592	68656	+	354	ftsY	BCI_0056	CDS	24747	1208	24747	1208	20.4859	603.199
68669	69310	+	213	ftsE	BCI_0057	CDS	24673	790	24673	790	31.2316	999.502
69330	70280	+	316	ftsX	BCI_0058	CDS	58169	1999	58169	1999	29.099	1588.35
70343	71203	+	286	rpoH	BCI_0059	CDS	46511	459	46511	459	101.331	1403.24
71376	72095	+	239	fre	BCI_0060	CDS	32946	1178	32946	1178	27.9677	1189.45
72230	73165	+	311	hemC	BCI_0061	CDS	34583	916	34583	916	37.7544	959.497
73173	73913	+	246	hemD	BCI_0062	CDS	18615	1776	18615	1776	10.4814	652.934
73928	75448	-	506	lnt	BCI_0063	CDS	16741	14269	14269	16741	0.852339	243.324
75494	75961	-	155	hyp_5	BCI_0064	CDS	395	12048	12048	395	30.5013	670.694
76001	77356	-	451	miaB	BCI_0065	CDS	456	56927	56927	456	124.84	1089.14
77544	79559	-	671	ligA	BCI_0066	CDS	1684	25806	25806	1684	15.3242	331.848
79623	80432	-	269	zipA	BCI_0067	CDS	1062	6336	6336	1062	5.9661	203.238
80668	81633	+	321	cysK	BCI_0068	CDS	112534	390	112534	390	288.549	3024.96
81807	82064	+	85	ptsH	BCI_0069	CDS	9620	101	9620	101	95.2475	976.556
82117	83832	+	571	ptsI	BCI_0070	CDS	41973	4389	41973	4389	9.56323	634.271
84144	84857	-	237	purC	BCI_0071	CDS	790	7655	7655	790	9.68987	278.701
85387	86463	+	358	purM	BCI_0072	CDS	37880	1159	37880	1159	32.6833	912.994
86454	87113	+	219	purN	BCI_0073	CDS	18886	4092	18886	4092	4.61535	744.11
87324	89411	+	695	ppk	BCI_0074	CDS	15627	18476	15627	18476	0.8458	194.014
89439	91436	-	665	tktA	BCI_0075	CDS	2080	129749	129749	2080	62.3793	1683.54
91457	92410	-	317	talB	BCI_0076	CDS	2341	74968	74968	2341	32.0239	2040.6
92901	93731	+	276	cysT	BCI_0077	CDS	26757	971	26757	971	27.5561	836.507
93740	94582	+	280	cysW	BCI_0078	CDS	20828	2582	20828	2582	8.06662	641.846
94585	95718	+	377	cysA	BCI_0079	CDS	29435	3373	29435	3373	8.72665	673.696
95991	96179	+	62	rnfB	BCI_0080	CDS	2011	2717	2011	2717	0.740155	279.873
96281	97555	-	424	tyrS	BCI_0081	CDS	6656	37118	37118	6656	5.57662	755.37
97591	98241	-	216	pdxH	BCI_0082	CDS	507	45844	45844	507	90.4221	1831.34
98475	98909	-	144	slyA	BCI_0083	CDS	594	79307	79307	594	133.513	4752.15
99001	99099	-	32	hyp_6	BCI_0084	CDS	23	1233	1233	23	53.6087	332.471
99313	99969	+	218	rnt	BCI_0085	CDS	34416	15921	34416	15921	2.16167	1362.21
100009	100368	-	119	BCI_0086	BCI_0086	CDS	2954	13286	13286	2954	4.49763	963.36
100574	101197	-	207	ribE	BCI_0087	CDS	492	13947	13947	492	28.3476	581.369
101349	101425	+	77	Val_tRNA2	BCI_0088	RNA	2867	69	2867	69	41.5507	321.276
101593	101937	+	114	momp	BCI_0089	CDS	158795	8744	158795	8744	18.1605	12019.1
102094	102165	-	72	Gln_tRNA	BCI_0090	RNA	48	6799	6799	48	141.646	814.805
102178	102254	-	77	Met_tRNA	BCI_0091	RNA	10	10644	10644	10	1064.4	1192.77
102263	102336	-	74	Gln_tRNA_2	BCI_0092	RNA	3	7154	7154	3	2384.67	834.177
102388	102473	-	86	Leu_tRNA1	BCI_0093	RNA	18	2203	2203	18	122.389	221.033
102617	104287	+	556	glnS	BCI_0094	CDS	76081	3220	76081	3220	23.6276	1180.71
104379	104909	-	176	fldA	BCI_0095	CDS	888	17299	17299	888	19.4809	848.105
105072	105818	+	248	hyp_7	BCI_0096	CDS	7800	1605	7800	1605	4.85981	271.384
106173	107354	+	393	sucC	BCI_0097	CDS	108359	2921	108359	2921	37.0965	2379.11
107342	108226	+	294	sucD	BCI_0098	CDS	67284	690	67284	690	97.513	1974.72
108228	109292	+	355	nc_21	nc_21	RNA	38130	7701	38130	7701	4.95131	926.786
109297	110598	+	434	tolB_gene	tolB_gene	CDS	492	7481	7481	492	15.2053	148.734
109385	109607	-	222	predicted_RNA	pRNA4	RNA	2528	8434	8434	2528	3.33623	327.81
110638	111273	+	211	pal	BCI_0100	CDS	28311	330	28311	330	85.7909	1157.75
111288	111935	+	215	hyp_8a	BCI_0101	CDS	47028	743	47028	743	63.2948	1887.38
111993	113039	+	348	nadA	BCI_0102	CDS	111846	8384	111846	8384	13.3404	2773.21
112996	114456	-	486	tilS	BCI_0103	CDS	8801	85277	85277	8801	9.68947	1514.04
114465	116123	-	552	antiporter	BCI_0104	CDS	2918	112767	112767	2918	38.6453	1762.72
116503	117357	-	284	ABC_trans	BCI_0105	CDS	1441	64079	64079	1441	44.4684	1946.88
117359	118201	-	280	troB	BCI_0106	CDS	1759	173513	173513	1759	98.643	5347.06
118286	118783	-	165	ssb	BCI_0107	CDS	1329	68471	68471	1329	51.5207	3580.67
119426	120775	+	450	gltP_degen	gltP_degen	CDS	28285	3980	28285	3980	7.10678	542.356
121415	121840	+	141	BCI_0109	BCI_0109	CDS	18095	469	18095	469	38.5821	1107.34
122087	122701	+	204	gmk	BCI_0110	CDS	56412	1382	56412	1382	40.8191	2386.07
122774	122971	+	65	rpoZ	BCI_0111	CDS	9382	384	9382	384	24.4323	1245.44
123268	125367	+	699	recG	BCI_0112	CDS	80896	6869	80896	6869	11.777	998.599
125425	126033	+	202	GTP-binding	BCI_0113	CDS	10703	5323	10703	5323	2.01071	457.189
126348	127268	-	306	polA	BCI_0114	CDS	3271	22534	22534	3271	6.88902	635.416
127464	128618	+	384	dnaX	BCI_0115	CDS	36687	4768	36687	4768	7.69442	824.37
128893	129231	+	112	hyp_8	BCI_0116	CDS	11114	1102	11114	1102	10.0853	856.236
129409	131304	+	631	htpG	BCI_0117	CDS	45824	2875	45824	2875	15.9388	626.621
131401	132042	+	213	adk	BCI_0118	CDS	25678	7854	25678	7854	3.26942	1040.21
132045	133118	-	357	purK	BCI_0119	CDS	7079	52999	52999	7079	7.48679	1280.97
133115	133624	-	169	purE	BCI_0120	CDS	220	32213	32213	220	146.423	1644.7
134028	135416	+	462	cysS	BCI_0121	CDS	23357	2875	23357	2875	8.12417	436.231
135430	136287	-	285	folD	BCI_0122	CDS	797	42807	42807	797	53.7102	1296.02
136485	136562	+	78	Arg_tRNA1	BCI_0123	RNA	1601	363	1601	363	4.41047	177.108
136685	137890	-	402	cyaA_degen	cyaA_degen	CDS	34601	2049	34601	2049	16.8868	742.683
137966	138790	+	274	dapF	BCI_0125	CDS	22363	5569	22363	5569	4.01562	704.24
138903	139619	+	238	BCI_0126	BCI_0126	CDS	18309	10980	18309	10980	1.66749	663.787
139475	139527	-	52	predicted_RNA	pRNA5	RNA	0	577	577	0	577	95.7445
139674	141614	+	646	uvrD	BCI_0127	CDS	55874	12097	55874	12097	4.61883	746.309
142061	143011	+	316	corA	BCI_0128	CDS	61451	10242	61451	10242	5.9999	1677.97
143038	143133	-	31	hyp_9	BCI_0129	CDS	1644	1682	1682	1644	1.02311	468.172
143136	144143	+	335	hyp_10	BCI_0130	CDS	14264	27923	14264	27923	0.510833	367.399
144158	146566	-	802	gyrB	BCI_0131	CDS	2273	131060	131060	2273	57.6595	1410.06
146724	147836	-	370	dnaN	BCI_0132	CDS	1295	61416	61416	1295	47.4255	1432.26
148605	148748	+	47	rpmH	BCI_0133	CDS	4454	606	4454	606	7.34983	817.699
148760	149107	+	115	rnpA	BCI_0134	CDS	8812	3560	8812	3560	2.47528	661.177
149083	149340	+	85	hyp_11	BCI_0135	CDS	7060	8163	7060	8163	0.864878	716.683
149236	149695	-	459	predicted_RNA	pRNA6	RNA	2491	15562	15562	2491	6.24729	292.546
149343	150944	+	533	yidC	BCI_0136	CDS	30917	22084	30917	22084	1.39997	500.508
150941	152314	+	457	trmE	BCI_0137	CDS	24773	22203	24773	22203	1.11575	467.739
152320	154158	-	612	glmS	BCI_0138	CDS	3930	77311	77311	3930	19.672	1090.01
154201	155610	-	469	glmU	BCI_0139	CDS	1757	56999	56999	1757	32.4411	1048.66
155664	156086	-	140	atpC	BCI_0140	CDS	146	16928	16928	146	115.945	1043.32
156100	157473	-	457	atpD	BCI_0141	CDS	1213	76796	76796	1213	63.3108	1449.99
157519	158382	-	287	atpG	BCI_0142	CDS	335	41076	41076	335	122.615	1234.94
158429	159970	-	513	atpA	BCI_0143	CDS	2194	135044	135044	2194	61.5515	2271.43
159992	160525	-	177	atpH	BCI_0144	CDS	727	33536	33536	727	46.1293	1634.85
160548	161018	-	156	atpF	BCI_0145	CDS	228	31386	31386	228	137.658	1736.01
161047	161289	-	80	atpE	BCI_0146	CDS	83	11100	11100	83	133.735	1197.22
161326	162147	-	273	atpB	BCI_0147	CDS	802	15334	15334	802	19.1197	484.656
162235	164130	-	631	gidA	BCI_0148	CDS	13178	17192	17192	13178	1.3046	235.092
164177	165154	-	325	gcvT	BCI_0149	CDS	1229	8079	8079	1229	6.57364	214.494
165307	167034	+	575	recJ	BCI_0150	CDS	34139	761	34139	761	44.8607	512.3
167153	168076	+	308	prfB_degen	prfB_degen	CDS	13963	1369	13963	1369	10.1994	391.173
168085	169605	+	506	lysS	BCI_0152	CDS	29637	2808	29637	2808	10.5545	505.388
169659	170483	+	274	murI	BCI_0153	CDS	2448	5439	2448	5439	0.450083	77.0907
170754	172301	+	1548	rrsB	BCI_0509	CDS	0	0	0	0	0	0
172415	172487	+	73	Glu_tRNA	BCI_0508	RNA	0	0	0	0	0	0
172572	175473	+	2902	rrlB	BCI_0507	CDS	0	0	0	0	0	0
175506	175623	+	118	rrfB	BCI_0506	CDS	0	0	0	0	0	0
175644	175720	+	77	Asp_tRNA	BCI_0158	RNA	26	0	26	0	26	2.91356
175744	175820	+	77	Trp_tRNA	BCI_0159	RNA	205	15	205	15	13.6667	22.9723
175857	177956	-	699	glyS	BCI_0160	CDS	10081	37729	37729	10081	3.74259	465.735
177962	178870	-	302	glyQ	BCI_0161	CDS	748	29000	29000	748	38.7701	828.576
179601	180509	-	302	metF	BCI_0162	CDS	1534	20056	20056	1534	13.0743	573.032
180690	181853	-	387	metB	BCI_0163	CDS	394	33321	33321	394	84.5711	742.931
181866	182486	+	207	metJ_degen	metJ_degen	CDS	2030	6933	2030	6933	0.292803	84.6188
182488	182766	-	92	rpmE	BCI_0165	CDS	242	13883	13883	242	57.3678	1302.08
182886	185000	+	704	priA	BCI_0166	CDS	22845	13079	22845	13079	1.74669	280.001
184682	184883	-	201	predicted_RNA	pRNA7	RNA	0	10238	10238	0	10238	439.501
185225	185767	+	180	hslV	BCI_0167	CDS	70795	264	70795	264	268.163	3393.68
185771	187111	+	446	hslU	BCI_0168	CDS	92535	401	92535	401	230.761	1790.24
187374	188144	+	256	tpiA	BCI_0169	CDS	26466	3174	26466	3174	8.33837	892.051
188146	189135	-	329	BCI_0170	BCI_0170	CDS	4028	29116	29116	4028	7.2284	763.619
189206	190168	-	320	pfkA	BCI_0171	CDS	599	39984	39984	599	66.7513	1078.15
190415	191230	-	271	cysE	BCI_0172	CDS	343	30988	30988	343	90.344	986.655
191281	192303	-	340	gpsA	BCI_0173	CDS	475	47246	47246	475	99.4653	1199.02
192689	193120	-	143	BCI_0174	BCI_0174	CDS	251	13992	13992	251	55.745	844.277
193227	194444	+	405	M23	BCI_0175	CDS	20806	4043	20806	4043	5.14618	443.277
194716	195207	+	163	coaD	BCI_0176	CDS	3472	4078	3472	4078	0.851398	183.795
195204	196013	-	269	mutM	BCI_0177	CDS	787	81997	81997	787	104.189	2630.19
196074	196241	-	55	rpmG	BCI_0178	CDS	77	20188	20188	77	262.182	3167.17
196291	196518	-	75	rpmB	BCI_0179	CDS	57	18709	18709	57	328.228	2152.44
196617	197483	-	288	hyp_12	BCI_0180	CDS	2771	35827	35827	2771	12.9293	1073.39
197581	198222	+	213	pyrE	BCI_0181	CDS	3169	5173	3169	5173	0.612604	128.376
198277	198729	-	150	dut	BCI_0182	CDS	583	23268	23268	583	39.9108	1338.47
198710	199924	-	404	dfp	BCI_0183	CDS	3534	21801	21801	3534	6.16893	465.625
200132	200208	-	77	Pro_tRNA1	BCI_0184	RNA	1	1326	1326	1	1326	148.592
200299	200387	-	89	Leu_tRNA2	BCI_0185	RNA	7	7247	7247	7	1035.29	702.602
200410	200485	-	76	His_tRNA	BCI_0186	RNA	8	6895	6895	8	861.875	782.82
200503	200580	-	78	Arg_tRNA2	BCI_0187	RNA	1	9099	9099	1	9099	1006.56
200830	202089	-	419	rho	BCI_0188	CDS	961	181433	181433	961	188.796	3736.31
202183	202509	-	108	trxA	BCI_0189	CDS	1628	42659	42659	1628	26.2033	3408.22
202633	202971	-	112	hyp_13	BCI_0190	CDS	3994	9118	9118	3994	2.28292	702.462
203304	204299	+	331	aroH	BCI_0191	CDS	12393	1458	12393	1458	8.5	323.065
204398	205093	-	231	hyp_14	BCI_0192	CDS	3247	4346	4346	3247	1.33847	162.338
205192	206151	+	319	rluD	BCI_0193	CDS	14685	1662	14685	1662	8.83574	397.214
206158	208878	+	862	clpB	BCI_0194	CDS	103968	5359	103968	5359	19.4006	1040.72
208875	209222	-	115	rplS	BCI_0195	CDS	1976	9617	9617	1976	4.8669	721.577
209239	209997	-	252	trmD	BCI_0196	CDS	824	84434	84434	824	102.468	2891.07
210022	210549	-	175	rimM	BCI_0197	CDS	145	57939	57939	145	399.579	2856.76
210539	210805	-	88	rpsP	BCI_0198	CDS	54	23193	23193	54	429.5	2274.13
210902	212251	-	449	ffh	BCI_0199	CDS	1184	66983	66983	1184	56.5735	1287.24
212407	212532	+	41	hyp_15	BCI_0200	CDS	1126	243	1126	243	4.63374	236.971
212553	214124	-	523	gshA	BCI_0201	CDS	10290	7877	7877	10290	0.7655	129.957
214296	214372	-	77	Arg_tRNA3	BCI_0202	RNA	3	703	703	3	234.333	78.7781
214380	214472	-	93	Ser_tRNA1	BCI_0203	RNA	3	1396	1396	3	465.333	129.522
214670	214855	-	61	csrA	BCI_0204	CDS	2228	2897	2897	2228	1.30027	409.789
215037	217691	-	884	alaS	BCI_0205	CDS	1884	81361	81361	1884	43.1852	794.155
217939	219054	-	350	recA	BCI_0206	CDS	447	40810	40810	447	91.2975	1006.1
219478	220260	+	260	BCI_0207	BCI_0207	CDS	26321	4407	26321	4407	5.97254	873.515
220287	220943	+	218	BCI_0208	BCI_0208	CDS	17798	772	17798	772	23.0544	704.459
221030	223597	+	855	mutS	BCI_0209	CDS	47366	4485	47366	4485	10.561	478.015
223856	224332	-	158	ispF	BCI_0210	CDS	4246	6965	6965	4246	1.64037	380.369
224342	225067	-	241	ispD	BCI_0211	CDS	334	56896	56896	334	170.347	2037.07
225382	226005	-	207	cysC	BCI_0212	CDS	1349	34472	34472	1349	25.5537	1436.94
226002	227444	-	480	cysN	BCI_0213	CDS	2006	144189	144189	2006	71.8789	2591.98
227457	228365	-	302	cysD	BCI_0214	CDS	2476	113383	113383	2476	45.7928	3239.53
228409	229797	-	462	cysG	BCI_0215	CDS	554	178772	178772	554	322.693	3338.86
229965	230702	-	245	cysH	BCI_0216	CDS	473	72547	72547	473	153.376	2555.02
230716	232416	-	566	cysI	BCI_0217	CDS	1381	210270	210270	1381	152.259	3205.55
232416	234203	-	595	cysJ	BCI_0218	CDS	2710	392230	392230	2710	144.734	5688.07
234505	234894	+	129	BCI_0219	BCI_0219	CDS	11410	5340	11410	5340	2.1367	763.198
234917	235588	-	223	hyp_16	BCI_0220	CDS	7410	27741	27741	7410	3.74372	1073.39
235629	236930	-	433	eno	BCI_0221	CDS	1641	100377	100377	1641	61.1682	2000.26
236998	238629	-	543	pyrG	BCI_0222	CDS	1950	78861	78861	1950	40.4415	1253.15
238738	239628	-	297	relA_degen	relA_degen	CDS	9274	13271	13271	9274	1.43099	385.557
239976	240665	+	229	pfs	BCI_0224	CDS	14841	20759	14841	20759	0.714919	559.202
240709	241056	-	115	hesB	BCI_0225	CDS	714	11630	11630	714	16.2885	872.616
241062	242465	-	468	mrcB_degen	mrcB_degen	CDS	9638	31851	31851	9638	3.30473	587.244
242468	242923	+	151	dksA	BCI_0227	CDS	25120	436	25120	436	57.6147	1435.44
243094	244482	+	463	pcnB	BCI_0228	CDS	31314	6888	31314	6888	4.54617	583.578
244508	245011	+	167	folK	BCI_0229	CDS	13035	1078	13035	1078	12.0918	673.497
245068	245865	+	265	panB	BCI_0230	CDS	20566	1392	20566	1392	14.7744	669.646
245884	246741	+	285	panC	BCI_0231	CDS	15076	4952	15076	4952	3.04443	456.439
246940	249525	+	861	leuS	BCI_0232	CDS	54949	16900	54949	16900	3.25142	550.678
249742	250779	+	345	holA	BCI_0233	CDS	18071	7465	18071	7465	2.42076	451.964
250772	251425	+	217	nadD	BCI_0234	CDS	4781	17740	4781	17740	0.269504	190.108
251137	252035	-	898	predicted_RNA	pRNA8	RNA	167	53346	53346	167	319.437	512.586
251496	253361	+	621	mrdA	BCI_0235	CDS	24027	16675	24027	16675	1.4409	333.848
253375	254466	+	363	mrdB	BCI_0236	CDS	39000	3405	39000	3405	11.4537	927.041
254594	255277	+	227	lipB	BCI_0237	CDS	56418	770	56418	770	73.2701	2144.53
255313	256197	+	294	lipA	BCI_0238	CDS	29387	575	29387	575	51.1078	862.48
256361	257662	+	411	mdtH	BCI_0239	CDS	12771	4499	12771	4499	2.83863	268.117
257862	258425	+	187	pgsA	BCI_0240	CDS	7416	8320	7416	8320	0.891346	342.192
258467	258541	+	75	Gly_tRNA2	BCI_0241	RNA	2622	27	2622	27	97.1111	301.656
258685	258755	+	71	Cys_tRNA	BCI_0242	RNA	2742	17	2742	17	161.294	333.235
258769	258854	+	86	Leu_tRNA3	BCI_0243	RNA	3227	215	3227	215	15.0093	323.774
258950	259951	+	333	pgl	BCI_0244	CDS	17748	25056	17748	25056	0.708333	459.882
259963	261264	-	433	bioA	BCI_0245	CDS	6971	47334	47334	6971	6.79013	943.249
261372	262400	+	342	bioB	BCI_0246	CDS	313547	2755	313547	2755	113.81	7910.75
262397	263575	+	392	bioF	BCI_0247	CDS	296626	3789	296626	3789	78.2861	6529.27
263562	264323	+	253	bioC	BCI_0248	CDS	98109	246	98109	246	398.817	3346.03
264316	264993	+	225	bioD	BCI_0249	CDS	50737	2173	50737	2173	23.3488	1945.73
265418	266218	+	253	BCI_0250	BCI_0250	CDS	27154	3277	27154	3277	8.28624	926.093
266278	266991	+	237	gpmA	BCI_0251	CDS	29074	1390	29074	1390	20.9165	1058.52
266998	268089	+	363	serC	BCI_0252	CDS	44380	3318	44380	3318	13.3755	1054.93
268184	269470	+	428	aroA	BCI_0253	CDS	40658	1577	40658	1577	25.7819	819.678
269532	270209	+	225	cmk	BCI_0254	CDS	33433	269	33433	269	124.286	1282.14
270342	272018	+	558	rpsA	BCI_0255	CDS	208454	1396	208454	1396	149.322	3223.42
272214	272378	+	54	hyp_17	BCI_0256	CDS	7726	1263	7726	1263	6.11718	1234.53
272440	273111	-	223	dsbA	BCI_0257	CDS	8501	9986	9986	8501	1.17469	386.392
273459	274484	+	341	pyrB	BCI_0258	CDS	15363	19002	15363	19002	0.808494	388.743
274498	274968	+	156	pyrI	BCI_0259	CDS	12779	6828	12779	6828	1.87156	706.828
275014	275409	+	131	L-PSP	BCI_0260	CDS	21439	8438	21439	8438	2.54077	1412.13
275505	275774	-	69	cspE	BCI_0261	CDS	410	147317	147317	410	359.31	18422.3
276002	276718	+	238	exsB	BCI_0262	CDS	54215	1472	54215	1472	36.8308	1965.55
276746	279100	-	784	lon	BCI_0263	CDS	9737	220052	220052	9737	22.5996	2421.87
279309	280574	-	421	clpX	BCI_0264	CDS	2949	64616	64616	2949	21.9112	1324.34
280711	281328	-	205	clpP	BCI_0265	CDS	1157	53994	53994	1157	46.6672	2272.65
281550	282860	-	436	tig	BCI_0266	CDS	2897	18814	18814	2897	6.4943	372.337
283346	284260	+	304	cyoA	BCI_0267	CDS	88150	1064	88150	1064	82.8477	2502.02
284291	286288	+	665	cyoB	BCI_0268	CDS	119383	3628	119383	3628	32.906	1549.04
286275	286886	+	203	cyoC	BCI_0269	CDS	20173	1095	20173	1095	18.4228	857.463
286891	287238	+	116	hypo_1	hypo_1	CDS	5982	960	5982	960	6.23125	444.969
287238	288104	+	288	cyoE	BCI_0270	CDS	15890	8547	15890	8547	1.85913	476.072
288133	289542	+	469	BCI_0271	BCI_0271	CDS	64834	4239	64834	4239	15.2946	1192.81
289571	290440	+	289	panE	BCI_0272	CDS	19929	10893	19929	10893	1.82952	595.016
290454	290750	-	98	thiI	BCI_0273	CDS	3506	4289	4289	3506	1.22333	377.634
291134	292048	+	304	ispA	BCI_0274	CDS	17373	1473	17373	1473	11.7943	493.108
292057	293958	+	623	dxs	BCI_0275	CDS	33699	2077	33699	2077	16.2248	466.735
294028	295764	+	578	argS	BCI_0276	CDS	41323	9515	41323	9515	4.34293	616.886
295815	297341	-	508	mviN	BCI_0277	CDS	30108	36389	36389	30108	1.20862	618.084
297338	297778	-	146	acpS	BCI_0278	CDS	885	22814	22814	885	25.7785	1348.31
297778	298509	-	243	pdxJ	BCI_0279	CDS	493	40783	40783	493	82.7241	1448.15
298643	299548	-	301	era	BCI_0280	CDS	1552	43781	43781	1552	28.2094	1255.05
299551	300228	-	225	rnc	BCI_0281	CDS	650	26060	26060	650	40.0923	999.386
300268	301203	-	311	lepB	BCI_0282	CDS	3079	22121	22121	3079	7.18448	613.742
301212	303020	-	602	lepA	BCI_0283	CDS	2075	192676	192676	2075	92.8559	2761.67
303208	303283	+	76	Thr_tRNA1	BCI_0284	RNA	522	2687	522	2687	0.194269	59.265
303301	306174	-	957	valS	BCI_0285	CDS	11042	76214	76214	11042	6.90219	687.17
306184	306648	-	154	holC	BCI_0286	CDS	2102	11197	11197	2102	5.32683	627.368
306672	308174	-	500	pepA	BCI_0287	CDS	847	159172	159172	847	187.924	2746.87
308547	309401	+	284	nadE	BCI_0288	CDS	28764	1685	28764	1685	17.0706	873.921
309469	310314	-	281	hemK	BCI_0289	CDS	2086	13992	13992	2086	6.70757	429.65
310311	311411	-	366	prfA	BCI_0290	CDS	2712	43457	43457	2712	16.024	1024.52
311719	312366	+	215	lolB	BCI_0291	CDS	17831	2330	17831	2330	7.65279	715.613
312363	313238	+	291	ispE	BCI_0292	CDS	22983	2656	22983	2656	8.65324	681.483
313291	314229	+	312	prsA	BCI_0293	CDS	32342	8398	32342	8398	3.85116	894.445
314339	314920	+	193	pth	BCI_0294	CDS	10104	18996	10104	18996	0.531901	451.728
314970	316040	+	356	ychF	BCI_0295	CDS	27432	2230	27432	2230	12.3013	664.888
316118	316906	+	262	fabI	BCI_0296	CDS	34075	406	34075	406	83.9286	1122.21
317059	318996	+	645	rnb	BCI_0297	CDS	60264	1145	60264	1145	52.6323	806.194
319003	319752	-	249	pyrF	BCI_0298	CDS	3428	10144	10144	3428	2.95916	351.521
319787	320101	-	98	hyp_18	BCI_0299	CDS	255	6413	6413	255	25.149	564.646
320418	321017	+	199	ribA	BCI_0300	CDS	2710	1846	2710	1846	1.46804	117.505
321060	322034	-	324	cysB	BCI_0301	CDS	3607	34479	34479	3607	9.55891	918.229
322283	324856	-	857	topA	BCI_0302	CDS	12536	61872	61872	12536	4.93555	622.952
325306	326070	+	254	hyp_19	BCI_0303	CDS	2985	4546	2985	4546	0.656621	101.403
326265	326567	+	100	hyp_20	BCI_0304	CDS	4100	190	4100	190	21.5789	353.773
326729	328180	+	483	cls	BCI_0305	CDS	11382	1731	11382	1731	6.57539	203.335
328635	329045	+	136	hns	BCI_0306	CDS	9927	3062	9927	3062	3.242	629.826
329091	329966	-	291	htpX	BCI_0307	CDS	11470	40806	40806	11470	3.55763	1209.96
330171	330659	-	162	ftn	BCI_0308	CDS	1194	31959	31959	1194	26.7663	1702.23
330747	332225	-	492	zwf	BCI_0309	CDS	1520	149390	149390	1520	98.2829	2619.98
332634	334097	+	483	pykA	BCI_0310	CDS	40566	615	40566	615	65.961	724.697
334517	335866	+	449	BCI_0311	BCI_0311	CDS	20828	2434	20828	2434	8.55711	400.26
336040	337047	-	335	ruvB	BCI_0312	CDS	2427	22842	22842	2427	9.41162	588.343
337056	337646	-	196	ruvA	BCI_0313	CDS	3765	8195	8195	3765	2.17663	360.773
337688	338209	-	173	ruvC	BCI_0314	CDS	10708	18330	18330	10708	1.7118	914.234
338703	340472	-	589	aspS	BCI_0315	CDS	3827	62304	62304	3827	16.2801	912.729
340697	341431	-	244	BCI_0316	BCI_0316	CDS	2387	63380	63380	2387	26.5522	2241.32
341666	341755	+	90	Ser_tRNA2	BCI_0317	RNA	3653	525	3653	525	6.9581	350.226
341775	343067	-	430	serS	BCI_0318	CDS	18168	29009	29009	18168	1.59671	582.111
343217	343843	-	208	lolA	BCI_0319	CDS	247	12040	12040	247	48.7449	499.464
343945	345972	-	666	ftsK	BCI_0320	CDS	4956	16843	16843	4956	3.39851	218.216
346139	347098	+	319	trxB	BCI_0321	CDS	28279	4026	28279	4026	7.02409	764.917
347213	347431	+	72	infA	BCI_0322	CDS	5889	281	5889	281	20.9573	705.749
347607	348335	+	242	artP	BCI_0323	CDS	36797	1562	36797	1562	23.5576	1312.01
348356	349084	+	242	artI	BCI_0324	CDS	27047	997	27047	997	27.1284	964.373
349081	349776	+	231	artQ	BCI_0325	CDS	15080	1442	15080	1442	10.4577	563.288
349798	350469	+	223	artM	BCI_0326	CDS	11483	797	11483	797	14.4078	444.316
350805	351116	+	103	rpsJ	BCI_0327	CDS	58458	163	58458	163	358.638	4897.2
351142	351780	+	212	rplC	BCI_0328	CDS	123745	1100	123745	1100	112.495	5036.55
351792	352397	+	201	rplD	BCI_0329	CDS	98477	1388	98477	1388	70.9488	4227.46
352394	352696	+	100	rplW	BCI_0330	CDS	44931	2649	44931	2649	16.9615	3876.92
352716	353534	+	272	rplB	BCI_0331	CDS	159618	3543	159618	3543	45.0517	5063.54
353556	353834	+	92	rpsS	BCI_0332	CDS	55351	130	55351	130	425.777	5191.33
353865	354197	+	110	rplV	BCI_0333	CDS	66694	293	66694	293	227.625	5231.61
354214	354915	+	233	rpsC	BCI_0334	CDS	178918	988	178918	988	181.091	6625.81
354927	355340	+	137	rplP	BCI_0335	CDS	123509	526	123509	526	234.808	7778.92
355337	355528	+	63	rpmC	BCI_0336	CDS	55309	61	55309	61	906.705	7575.24
355521	355790	+	89	rpsQ	BCI_0337	CDS	86818	714	86818	714	121.594	8417.07
355831	356313	+	160	rplN	BCI_0338	CDS	13064	465	13064	465	28.0946	704.527
356325	356639	+	104	rplX	BCI_0339	CDS	14198	114	14198	114	124.544	1177.97
356663	357208	+	181	rplE	BCI_0340	CDS	29709	250	29709	250	118.836	1416.28
357231	357536	+	101	rpsN	BCI_0341	CDS	22237	48	22237	48	463.271	1899.75
357569	357967	+	132	rpsH	BCI_0342	CDS	27083	171	27083	171	158.38	1770.37
357982	358515	+	177	rp1F	BCI_0343	CDS	32805	623	32805	623	52.6565	1599.22
358529	358876	+	115	rplR	BCI_0344	CDS	25452	155	25452	155	164.206	1909.7
358888	359391	+	167	rpsE	BCI_0345	CDS	31039	407	31039	407	76.2629	1603.73
359395	359577	+	60	rpmD	BCI_0346	CDS	11485	292	11485	292	39.3322	1651.66
359578	360009	+	143	rplO	BCI_0347	CDS	27030	165	27030	165	163.818	1630.99
360025	361359	+	444	secY	BCI_0348	CDS	84573	1371	84573	1371	61.6871	1643.58
361397	361513	+	38	rpmJ	BCI_0349	CDS	7610	125	7610	125	60.88	1727.99
361539	361895	+	118	rpsM	BCI_0350	CDS	29777	318	29777	318	93.6384	2177.41
361920	362309	+	129	rpsK	BCI_0351	CDS	30751	193	30751	193	159.332	2056.89
362356	362976	+	206	rpsD	BCI_0352	CDS	48578	1451	48578	1451	33.479	2034.76
362997	363980	+	327	rpoA	BCI_0353	CDS	82438	9537	82438	9537	8.64402	2175.31
364044	364430	+	128	rplQ	BCI_0354	CDS	23083	3126	23083	3126	7.3842	1556.05
364453	364530	-	78	Thr_tRNA2	BCI_0355	RNA	544	1348	1348	544	2.47794	149.12
364558	364629	-	72	Gly_tRNA	BCI_0356	RNA	36	1588	1588	36	44.1111	190.309
364646	364727	-	82	Tyr_tRNA	BCI_0357	RNA	7	1980	1980	7	282.857	208.35
364746	364818	-	73	Thr_tRNA	BCI_0358	RNA	18	875	875	18	48.6111	103.425
365098	366036	+	312	coaA	BCI_0359	CDS	4500	9546	4500	9546	0.471402	124.451
366098	367033	+	311	prmB	BCI_0360	CDS	20199	1247	20199	1247	16.1981	560.416
367048	368115	+	355	aroC	BCI_0361	CDS	20645	540	20645	540	38.2315	501.797
368366	369586	+	406	fabB	BCI_0362	CDS	37167	524	37167	524	70.9294	789.901
369660	370790	+	376	pdxB	BCI_0363	CDS	84324	1711	84324	1711	49.2835	1935.1
370798	371601	+	267	truA	BCI_0364	CDS	48747	1231	48747	1231	39.5995	1575.35
371713	372600	+	295	accD	BCI_0365	CDS	15488	3474	15488	3474	4.45826	453.017
372643	373923	+	426	folC	BCI_0366	CDS	13771	5626	13771	5626	2.44774	278.931
374317	374802	+	161	cvpA	BCI_0367	CDS	9430	217	9430	217	43.4562	505.39
374842	376260	+	472	purF	BCI_0368	CDS	28211	1626	28211	1626	17.3499	515.724
376380	377834	-	484	nuoN	BCI_0369	CDS	12378	19097	19097	12378	1.54282	340.456
377693	377763	+	70	predicted_RNA	pRNA9	RNA	1020	0	1020	0	1020	125.731
377859	379382	-	507	nuoM	BCI_0370	CDS	13660	37097	37097	13660	2.71574	631.353
379358	379507	+	149	predicted_RNA	pRNA10	RNA	14914	13143	14914	13143	1.13475	863.672
379432	381297	-	621	nuoL	BCI_0371	CDS	10573	77352	77352	10573	7.31599	1074.78
381294	381596	-	100	nuoK	BCI_0372	CDS	547	10910	10910	547	19.9452	941.382
381644	382141	-	165	nuoJ	BCI_0373	CDS	1541	32603	32603	1541	21.157	1704.96
382165	382707	-	180	nuoI	BCI_0374	CDS	1616	31260	31260	1616	19.3441	1498.5
382731	383696	-	321	nuoH	BCI_0375	CDS	2432	30933	30933	2432	12.7192	831.492
383705	386434	-	909	nuoG	BCI_0376	CDS	7139	132536	132536	7139	18.5651	1258.09
386516	387850	-	444	nuoF	BCI_0377	CDS	177	49815	49815	177	281.441	968.096
387847	388350	-	167	nuoE	BCI_0378	CDS	368	17660	17660	368	47.9891	912.463
388353	390140	-	595	nuoCD	BCI_0379	CDS	4598	72102	72102	4598	15.6812	1045.61
390249	390923	-	224	nuoB	BCI_0380	CDS	954	58437	58437	954	61.2547	2251.03
390987	391373	-	128	nuoA	BCI_0381	CDS	3961	29321	29321	3961	7.40242	1976.56
391621	392823	+	400	ackA	BCI_0382	CDS	54165	2901	54165	2901	18.6711	1168.42
392877	395012	+	711	pta	BCI_0383	CDS	39982	26210	39982	26210	1.52545	485.217
395031	395297	-	88	BCI_0384	BCI_0384	CDS	1904	13364	13364	1904	7.01891	1310.37
395299	396429	-	376	nrdB	BCI_0385	CDS	1213	53007	53007	1213	43.6991	1216.43
396480	398762	-	760	nrdA	BCI_0386	CDS	6950	83535	83535	6950	12.0194	948.41
399298	401841	+	847	gyrA	BCI_0387	CDS	224176	5714	224176	5714	39.2328	2283.74
402170	403297	+	375	ddlA	BCI_0388	CDS	58624	3060	58624	3060	19.1582	1348.92
403289	403362	-	74	Pro_tRNA	BCI_0389	RNA	139	1237	1237	139	8.89928	144.238
403459	403743	-	94	rplY	BCI_0390	CDS	2505	19892	19892	2505	7.94092	1825.96
403876	404463	-	195	nlpC	BCI_0391	CDS	3280	12399	12399	3280	3.78018	548.647
404495	405373	-	292	nfo	BCI_0392	CDS	273	13759	13759	273	50.3993	406.579
405526	407004	+	492	lysP	BCI_0393	CDS	19728	1316	19728	1316	14.9909	345.986
407148	407810	+	220	folE	BCI_0394	CDS	7460	4818	7460	4818	1.54836	292.589
407840	408421	-	193	dcd	BCI_0395	CDS	1267	15341	15341	1267	12.1081	685.863
408614	410257	+	547	metG	BCI_0396	CDS	53547	53077	53547	53077	1.00886	844.674
410283	411689	-	468	gnd	BCI_0397	CDS	5554	127141	127141	5554	22.8918	2344.13
411892	412515	-	207	hisI	BCI_0398	CDS	3106	60648	60648	3106	19.5261	2528.06
412509	413285	-	258	hisF	BCI_0399	CDS	416	88583	88583	416	212.94	2962.59
413267	414013	-	248	hisA	BCI_0400	CDS	752	94959	94959	752	126.275	3303.89
414016	414609	-	197	hisH	BCI_0401	CDS	927	77485	77485	927	83.5868	3393.85
414606	415676	-	356	hisB	BCI_0402	CDS	725	163399	163399	725	225.378	3960.41
415682	416764	-	360	hisC	BCI_0403	CDS	7005	214388	214388	7005	30.605	5138.53
416761	418074	-	437	hisD	BCI_0404	CDS	2030	238611	238611	2030	117.542	4711.4
418078	418977	-	299	hisG	BCI_0405	CDS	2316	230739	230739	2316	99.6282	6658.72
419623	420252	+	209	BCI_0406	BCI_0406	CDS	50834	1738	50834	1738	29.2486	2098.69
420279	421469	-	396	aspC	BCI_0407	CDS	19318	28469	28469	19318	1.4737	620.323
421550	422953	-	467	asnC	BCI_0408	CDS	940	27786	27786	940	29.5596	513.393
423379	424389	+	336	pyrD	BCI_0409	CDS	65761	4625	65761	4625	14.2186	1688.77
424522	425043	-	173	fabA	BCI_0410	CDS	1765	7613	7613	1765	4.31331	379.709
425090	426844	-	584	hyp_21	BCI_0411	CDS	1246	36163	36163	1246	29.0233	534.309
427111	427428	-	105	hspQ	BCI_0412	CDS	1556	36746	36746	1556	23.6157	3019.69
427534	428025	-	163	dsvC	BCI_0413	CDS	759	12495	12495	759	16.4625	661.439
428047	428131	+	85	Ser_tRNA	BCI_0414	RNA	2865	35	2865	35	81.8571	290.835
428219	429154	-	311	fmt	BCI_0415	CDS	16466	17220	17220	16466	1.04579	477.765
429204	429707	-	167	def	BCI_0416	CDS	1359	11615	11615	1359	8.54673	600.128
429939	430535	+	198	hyp_22	BCI_0417	CDS	22707	1560	22707	1560	14.5558	989.545
430619	431383	+	254	aroE	BCI_0418	CDS	11090	1618	11090	1618	6.85414	376.738
431428	434919	-	1163	BCI_0419	BCI_0419	CDS	15604	61978	61978	15604	3.97193	459.832
434949	436340	-	463	fumC	BCI_0420	CDS	5985	26477	26477	5985	4.42389	493.434
436947	437022	+	76	Asn_tRNA	BCI_0421	RNA	4265	11	4265	11	387.727	484.224
437173	438279	+	368	trmU	BCI_0422	CDS	90247	9669	90247	9669	9.33364	2116.05
438606	439997	+	463	purB	BCI_0423	CDS	147466	8420	147466	8420	17.5138	2748.22
440033	441280	-	415	lolE	BCI_0424	CDS	4496	20999	20999	4496	4.6706	436.608
441277	441987	-	236	lolD	BCI_0425	CDS	1996	13719	13719	1996	6.87325	501.593
441980	443173	-	397	lolC	BCI_0426	CDS	1465	26078	26078	1465	17.8007	566.794
443281	443814	-	177	BCI_0427	BCI_0427	CDS	1101	23387	23387	1101	21.2416	1140.1
443829	444194	-	121	BCI_0428	BCI_0428	CDS	231	15269	15269	231	66.0996	1088.85
444191	444991	-	266	BCI_0429	BCI_0429	CDS	5890	39145	39145	5890	6.64601	1269.8
445036	446034	-	332	holB	BCI_0430	CDS	5583	43098	43098	5583	7.71951	1120.11
446037	446675	-	212	tmk	BCI_0431	CDS	1097	24751	24751	1097	22.5624	1007.39
446730	447533	-	267	pabC	BCI_0432	CDS	799	39086	39086	799	48.9186	1263.14
447634	447867	-	77	acpP	BCI_0433	CDS	422	64599	64599	422	153.078	7238.96
448023	448757	-	244	fabG	BCI_0434	CDS	1559	104652	104652	1559	67.1276	3700.83
448741	449703	-	320	fabD	BCI_0435	CDS	3032	115673	115673	3032	38.1507	3119.06
449723	450676	-	317	fabH	BCI_0436	CDS	485	193510	193510	485	398.99	5267.27
450723	450824	+	33	hyp_23	BCI_0437	CDS	14	3938	14	3938	0.0035551	3.66063
451081	451251	-	56	rpmF	BCI_0438	CDS	127	7900	7900	127	62.2047	1217.25
451394	452362	-	322	rluC	BCI_0439	CDS	9009	16346	16346	9009	1.81441	438.023
452880	454649	+	589	rne	BCI_0440	CDS	14005	38897	14005	38897	0.360053	205.168
454097	455144	-	1047	predicted_RNA	pRNA11	RNA	595	210454	210454	595	353.704	1734.41
455005	456099	+	364	pyrC	BCI_0441	CDS	7551	1728	7551	1728	4.36979	178.996
456215	458071	+	618	sppA	BCI_0442	CDS	72405	4066	72405	4066	17.8074	1010.93
458117	459187	+	356	gapA	BCI_0443	CDS	101112	684	101112	684	147.825	2450.72
459430	460125	+	231	minC	BCI_0444	CDS	97961	1310	97961	1310	74.7794	3659.17
460142	460954	+	270	minD	BCI_0445	CDS	56159	765	56159	765	73.4105	1794.72
460958	461239	+	93	minE	BCI_0446	CDS	21910	607	21910	607	36.0956	2032.83
461260	461958	-	232	BCI_0447	BCI_0447	CDS	16733	17016	17016	16733	1.01691	632.864
462025	462972	-	315	BCI_0448	BCI_0448	CDS	2516	65022	65022	2516	25.8434	1781.11
463060	463899	-	279	BCI_0449	BCI_0449	CDS	562	74630	74630	562	132.794	2308.08
463921	464721	-	266	BCI_0450	BCI_0450	CDS	1349	77453	77453	1349	57.4151	2512.45
464758	465726	-	322	BCI_0451	BCI_0451	CDS	1195	72935	72935	1195	61.0335	1954.44
466225	467559	+	444	terC	BCI_0452	CDS	15969	2854	15969	2854	5.5953	310.339
467724	469082	-	452	pabB	BCI_0453	CDS	13150	17223	17223	13150	1.30973	328.785
469204	470178	+	324	BCI_0454	BCI_0454	CDS	17068	4626	17068	4626	3.68958	454.547
470183	470258	-	76	Ala_tRNA2	BCI_0455	RNA	31	1538	1538	31	49.6129	174.616
470279	471679	-	466	gltX	BCI_0456	CDS	5563	51129	51129	5563	9.1909	946.722
471790	471862	+	73	Val_tRNA	BCI_0457	RNA	2054	10	2054	10	205.4	242.783
471901	471976	+	76	Lys_tRNA	BCI_0458	RNA	2305	557	2305	557	4.13824	261.697
472023	473540	-	505	emrB	BCI_0459	CDS	25159	54513	54513	25159	2.16674	931.429
473575	474786	-	403	emrA	BCI_0460	CDS	2341	117553	117553	2341	50.2149	2516.92
475083	475517	-	144	sufE	BCI_0461	CDS	690	15659	15659	690	22.6942	938.302
475533	476756	-	407	sufS	BCI_0462	CDS	3341	77094	77094	3341	23.0751	1634.43
476753	478051	-	432	sufD	BCI_0463	CDS	8537	47356	47356	8537	5.54715	945.872
478032	478772	-	246	sufC	BCI_0464	CDS	906	30997	30997	906	34.213	1087.24
478847	480322	-	491	sufB	BCI_0465	CDS	2092	84448	84448	2092	40.3671	1484.05
480337	480696	-	119	sufA	BCI_0466	CDS	138	17349	17349	138	125.717	1257.97
480843	483227	-	794	pheT	BCI_0467	CDS	19221	39323	39323	19221	2.04584	427.334
483244	484227	-	327	pheS	BCI_0468	CDS	8511	24551	24551	8511	2.88462	647.832
484295	484657	-	120	rplT	BCI_0469	CDS	130	20429	20429	130	157.146	1468.95
484685	484882	-	65	rpmI	BCI_0470	CDS	64	16136	16136	64	252.125	2142.02
484928	485443	-	171	infC	BCI_0471	CDS	523	46182	46182	523	88.3021	2330.33
485475	487403	-	642	thrS	BCI_0472	CDS	4450	54443	54443	4450	12.2344	731.726
487653	488375	-	240	dnaQ	BCI_0473	CDS	939	1584	1584	939	1.6869	56.9489
488425	488886	+	153	rnhA	BCI_0474	CDS	2016	1313	2016	1313	1.53542	113.695
488971	489744	+	257	gloB	BCI_0475	CDS	5442	837	5442	837	6.50179	182.712
489766	490602	-	278	hyp_24	BCI_0476	CDS	18095	2496	2496	18095	0.137939	77.4713
490684	491706	-	340	mltC	BCI_0477	CDS	7722	7464	7464	7722	0.966589	189.424
491812	492045	-	77	hyp_25	BCI_0478	CDS	387	1657	1657	387	4.28165	185.683
492130	493287	-	385	BCI_0479	BCI_0479	CDS	8567	12772	12772	8567	1.49084	286.246
493284	493691	-	408	gene	gene_2	CDS	850	8556	8556	850	10.0659	180.947
493691	494254	-	187	hyp_26	BCI_0481	CDS	1015	32698	32698	1015	32.2148	1508.76
494302	495255	-	317	gshB	BCI_0482	CDS	1495	65572	65572	1495	43.8609	1784.84
495314	495937	-	207	sodA	BCI_0483	CDS	2518	81022	81022	2518	32.1771	3377.33
495970	496542	-	190	yhgI	BCI_0484	CDS	6550	29189	29189	6550	4.45634	1325.58
496690	497451	+	253	bioH	BCI_0485	CDS	17570	913	17570	913	19.2442	599.228
497561	497634	+	74	Ile_tRNA	BCI_0486	RNA	2048	6	2048	6	341.333	238.803
497662	497734	+	73	Ala_tRNA	BCI_0487	RNA	3718	7	3718	7	531.143	439.468
497784	498227	+	147	BCI_0488	BCI_0488	CDS	15278	1688	15278	1688	9.05095	896.789
498343	498714	+	123	dsrE	BCI_0489	CDS	7711	1793	7711	1793	4.30061	540.937
498726	499085	+	119	dsrF	BCI_0490	CDS	9827	3831	9827	3831	2.56513	712.55
499095	499382	+	95	dsrH	BCI_0491	CDS	6116	681	6116	681	8.98091	555.501
499440	499814	+	124	rpsL	BCI_0492	CDS	11707	248	11707	248	47.2056	814.639
499873	500343	+	156	rpsG	BCI_0493	CDS	16413	252	16413	252	65.131	907.83
500448	502565	+	705	fusA	BCI_0494	CDS	82648	1226	82648	1226	67.4127	1011.54
502681	503865	+	394	tuf	BCI_0495	CDS	189245	1753	189245	1753	107.955	4144.47
503931	504314	+	127	secE	BCI_0496	CDS	27151	594	27151	594	45.7088	1844.69
504315	504860	+	181	nusG	BCI_0497	CDS	66696	561	66696	561	118.888	3179.53
504916	505344	+	142	rplK	BCI_0498	CDS	44464	546	44464	546	81.4359	2701.85
505348	506052	+	234	rplA	BCI_0499	CDS	75710	2400	75710	2400	31.5458	2791.76
506232	506732	+	166	rplJ	BCI_0500	CDS	66087	553	66087	553	119.506	3435.18
506768	507133	+	121	rplL	BCI_0501	CDS	37718	185	37718	185	203.881	2689.7
507307	511329	+	1340	rpoB	BCI_0502	CDS	163383	2177	163383	2177	75.0496	1052.07
511418	515644	+	1408	rpoC	BCI_0503	CDS	314365	4367	314365	4367	71.9865	1926.52
515662	516690	+	342	murB	BCI_0504	CDS	57392	2241	57392	2241	25.61	1447.99
516692	517540	+	282	birA	BCI_0505	CDS	9516	3274	9516	3274	2.90654	291.17
517580	517697	-	118	rrfA	BCI_0157	RNA	9	4	4	9	0.444444	0.292495
517730	520631	-	2902	rrlA	BCI_0156	RNA	0	0	0	0	0	0
520716	520788	-	73	Glu_tRNA2	BCI_0155	RNA	0	0	0	0	0	0
520902	522449	-	1548	rrsA	BCI_0154	RNA	0	0	0	0	0	0
522858	524270	-	470	lpdA	BCI_0510	CDS	1339	32704	32704	1339	24.4242	600.405
524329	525618	-	358	aceF	BCI_0511	CDS	1140	10540	10540	1140	9.24561	254.038
525629	528298	-	889	aceE	BCI_0512	CDS	2559	37185	37185	2559	14.5311	360.917
528653	529540	+	295	nadC	BCI_0513	CDS	6297	1955	6297	1955	3.22097	184.184
529591	530202	+	203	coaE	BCI_0514	CDS	3379	6	3379	6	563.167	143.626
530326	532893	-	856	secA_degen	secA_degen	CDS	6	9390	9390	6	1565	94.6527
533136	533657	+	173	hyp_27	BCI_0516	CDS	2111	3588	2111	3588	0.58835	105.289
533781	534953	-	390	ftsZ	BCI_0517	CDS	2368	22009	22009	2368	9.29434	486.942
535265	536737	-	490	murC	BCI_0518	CDS	1539	35954	35954	1539	23.3619	633.129
536809	537885	-	358	murG	BCI_0519	CDS	485	59874	59874	485	123.452	1443.1
538203	539543	-	446	murD	BCI_0520	CDS	7881	76590	76590	7881	9.71831	1481.76
539545	540627	-	360	mraY	BCI_0521	CDS	5436	65594	65594	5436	12.0666	1572.18
540621	541982	-	453	murF	BCI_0522	CDS	6671	37070	37070	6671	5.55689	706.099
541985	543472	-	495	murE	BCI_0523	CDS	4392	53309	53309	4392	12.1378	929.258
543659	544612	-	317	mraW	BCI_0524	CDS	951	39048	39048	951	41.0599	1062.87
544713	545579	-	288	queF	BCI_0525	CDS	10120	24879	24879	10120	2.4584	745.387
545764	546558	-	264	map	BCI_0526	CDS	931	15780	15780	931	16.9495	515.756
546863	547561	+	232	rpsB	BCI_0527	CDS	23173	551	23173	551	42.0563	861.857
547604	548446	+	280	tsf	BCI_0528	CDS	28465	651	28465	651	43.725	877.191
548506	549255	+	249	pyrH	BCI_0529	CDS	32052	351	32052	351	91.3162	1110.7
549304	549861	+	185	frr	BCI_0530	CDS	25945	1892	25945	1892	13.713	1210.11
550015	551211	+	398	dxr	BCI_0531	CDS	20809	22404	20809	22404	0.928807	451.138
550898	551238	-	340	predicted_RNA	pRNA12	RNA	38	12099	12099	38	318.395	307.052
551341	552102	+	253	uppS	BCI_0532	CDS	16635	527	16635	527	31.5655	567.34
552112	552966	+	284	cdsA	BCI_0533	CDS	17433	2429	17433	2429	7.17703	529.657
552986	554365	+	459	ecfE	BCI_0534	CDS	48202	4666	48202	4666	10.3305	906.136
554370	556751	+	793	OMP85	BCI_0535	CDS	38628	14973	38628	14973	2.57984	420.31
556830	557327	+	165	ompH	BCI_0536	CDS	60405	194	60405	194	311.366	3158.86
557583	558032	+	149	fabZ	BCI_0537	CDS	12202	1262	12202	1262	9.66878	706.62
558257	561748	+	1163	dnaE	BCI_0538	CDS	100183	7044	100183	7044	14.2225	743.285
561765	562724	+	319	accA	BCI_0539	CDS	27333	718	27333	718	38.0682	739.329
562746	563936	-	396	metC	BCI_0540	CDS	1073	87971	87971	1073	81.986	1916.84
564244	564918	+	224	mutH	BCI_0541	CDS	7087	8723	7087	8723	0.81245	272.996
564708	564858	-	150	predicted_RNA	pRNA13	RNA	0	5130	5130	0	5130	295.099
565076	565555	+	159	nudH	BCI_0542	CDS	10656	1073	10656	1073	9.93103	578.28
565763	566620	+	285	lgt	BCI_0543	CDS	10835	368	10835	368	29.4429	328.039
566651	567445	+	264	thyA	BCI_0544	CDS	25711	8417	25711	8417	3.05465	840.342
567517	570813	+	1098	recC	BCI_0545	CDS	60811	8947	60811	8947	6.7968	477.882
570857	574408	+	1183	recB	BCI_0546	CDS	46143	52468	46143	52468	0.87945	336.56
573560	574082	-	522	predicted_RNA	pRNA14	RNA	0	6240	6240	0	6240	103.147
574133	574356	-	223	predicted_RNA	pRNA15	RNA	2504	14269	14269	2504	5.69848	552.115
574456	576315	+	619	recD	BCI_0547	CDS	5955	14259	5955	14259	0.417631	83.0104
574699	574964	-	265	predicted_RNA	pRNA16	RNA	0	6022	6022	0	6022	196.081
576514	577146	+	210	crp	BCI_0548	CDS	35271	445	35271	445	79.2607	1449.24
577230	577820	-	196	pabA	BCI_0549	CDS	5412	2605	2605	5412	0.481338	114.681
577980	579392	+	470	dnaB	BCI_0550	CDS	17146	3609	17146	3609	4.7509	314.779
579471	579543	+	73	Arg_tRNA	BCI_0551	RNA	232	633	232	633	0.366509	27.4225
579809	581704	+	631	dnaK	BCI_0552	CDS	57246	783	57246	783	73.1111	782.811
581803	582921	+	372	dnaJ	BCI_0553	CDS	22481	2886	22481	2886	7.78967	521.451
582954	583217	-	87	rpsT	BCI_0554	CDS	7198	11642	11642	7198	1.61739	1154.65
583427	584410	+	327	ribF	BCI_0555	CDS	32678	1351	32678	1351	24.188	862.281
584422	587238	+	938	ileS	BCI_0556	CDS	127706	6820	127706	6820	18.7252	1174.76
587238	587741	+	167	lspA	BCI_0557	CDS	30318	691	30318	691	43.8755	1566.48
587770	588711	+	313	ispH	BCI_0558	CDS	89707	549	89707	549	163.401	2472.99
588861	590006	+	381	carA	BCI_0559	CDS	35818	1586	35818	1586	22.5839	811.181
590025	593264	+	1079	carB	BCI_0560	CDS	103698	4079	103698	4079	25.4224	829.259
593307	593804	+	165	folA	BCI_0561	CDS	4000	9993	4000	9993	0.40028	209.179
593806	594672	-	288	apaH	BCI_0562	CDS	1094	39573	39573	1094	36.1728	1185.63
594902	595717	-	271	ksgA	BCI_0563	CDS	24522	6314	6314	24522	0.257483	201.037
595710	596714	-	334	pdxA	BCI_0564	CDS	1516	33855	33855	1516	22.3318	874.616
596701	598002	-	433	surA	BCI_0565	CDS	2319	38672	38672	2319	16.6762	770.637
598051	598383	+	110	smpA	BCI_0566	CDS	4436	3767	4436	3767	1.17759	347.969
598411	598740	-	109	hyp_28	BCI_0567	CDS	5851	8797	8797	5851	1.5035	696.385
598916	599401	+	161	smpB	BCI_0568	CDS	50141	172	50141	172	291.517	2687.25
599480	599854	+	375	sRNA	BCI_0569	RNA	2884174	15722	2884174	15722	183.448	66363.8
599882	600625	-	247	cysQ	BCI_0570	CDS	8209	43662	43662	8209	5.3188	1525.27
600646	601098	-	150	rplI	BCI_0571	CDS	432	33335	33335	432	77.1644	1917.57
601184	601411	-	75	rpsR	BCI_0572	CDS	193	12965	12965	193	67.1762	1491.6
601415	601768	-	117	priN	BCI_0573	CDS	175	20121	20121	175	114.977	1483.9
601772	602149	-	125	rpsF	BCI_0574	CDS	572	15341	15341	572	26.8199	1058.97
602303	603049	-	248	BCI_0575	BCI_0575	CDS	598	20244	20244	598	33.8528	704.346
603138	605387	-	749	rnr	BCI_0576	CDS	1319	73874	73874	1319	56.0076	851.042
605490	606788	-	432	purA	BCI_0577	CDS	1086	90203	90203	1086	83.0599	1801.68
606892	607893	-	333	hflC	BCI_0578	CDS	871	36847	36847	871	42.3042	954.771
607900	609060	-	386	hflK	BCI_0579	CDS	398	33705	33705	398	84.6859	753.439
609103	610386	-	427	hflX	BCI_0580	CDS	887	26842	26842	887	30.2616	542.411
610494	610754	-	86	hfq	BCI_0581	CDS	950	3761	3761	950	3.95895	377.351
610770	611036	+	88	hyp_29	BCI_0582	CDS	209	3005	209	3005	0.0695507	20.493
611067	611996	-	309	miaA	BCI_0583	CDS	453	4923	4923	453	10.8675	137.471
612006	613814	-	602	mutL	BCI_0584	CDS	7733	28305	28305	7733	3.66029	405.703
613891	615108	-	382	BCI_0585	BCI_0585	CDS	3595	23475	23475	3595	6.5299	530.253
615477	616031	-	184	orn	BCI_0586	CDS	3358	78875	78875	3358	23.4887	3698.82
616407	617285	+	292	psd	BCI_0587	CDS	10828	12939	10828	12939	0.83685	319.968
617561	618544	-	327	genX	BCI_0588	CDS	5252	38482	38482	5252	7.32711	1015.43
618632	619201	-	189	efp	BCI_0589	CDS	7997	16395	16395	7997	2.05014	748.498
619235	620254	+	339	yodO	BCI_0590	CDS	55115	21943	55115	21943	2.51173	1402.85
620344	621984	-	546	groEL	BCI_0591	CDS	1010	390081	390081	1010	386.219	6164.58
622026	622319	-	97	groES	BCI_0592	CDS	331	54182	54182	331	163.692	4819.75
622572	623990	+	472	aspA	BCI_0593	CDS	26648	1207	26648	1207	22.0779	487.151
624068	624140	+	73	Phe_tRNA	BCI_0594	RNA	1293	27	1293	27	47.8889	152.833
624393	624995	-	200	BCI_0595	BCI_0595	CDS	781	110917	110917	781	142.019	4785.3
625182	626243	+	353	queA	BCI_0596	CDS	55977	10699	55977	10699	5.23198	1368.28
626305	627417	+	370	tgt	BCI_0597	CDS	41629	2125	41629	2125	19.5901	970.813
627439	627771	+	110	yajC	BCI_0598	CDS	12877	725	12877	725	17.7614	1010.1
627805	629643	+	612	secD	BCI_0599	CDS	94649	5177	94649	5177	18.2826	1334.46
629654	630574	+	306	secF	BCI_0600	CDS	55728	2811	55728	2811	19.825	1571.42
630832	631986	+	378	ribD	BCI_0601	CDS	82762	8542	82762	8542	9.68883	1889.21
632056	632574	+	172	ribH	BCI_0602	CDS	27083	269	27083	269	100.68	1358.66
632601	633020	+	139	nusB	BCI_0603	CDS	29935	500	29935	500	59.87	1858.26
633102	634079	+	325	thiL	BCI_0604	CDS	43379	2015	43379	2015	21.528	1151.69
634087	634593	+	168	pgpA	BCI_0605	CDS	31293	1127	31293	1127	27.7666	1607.23
634648	636423	+	591	OMP85_b	BCI_0606	CDS	100391	7792	100391	7792	12.8839	1465.71
636420	639368	+	982	hyp_30	BCI_0607	CDS	106675	10663	106675	10663	10.0042	937.33
639384	639917	-	177	ppa	BCI_0608	CDS	5554	9896	9896	5554	1.78178	482.423
640077	641750	-	557	proS	BCI_0609	CDS	1305	60793	60793	1305	46.5847	941.759
641839	641924	-	86	Leu_tRNA	BCI_0610	RNA	12	2438	2438	12	203.167	244.611
642053	642958	-	301	nadK	BCI_0611	CDS	1640	3713	3713	1640	2.26402	106.439
643042	643638	+	198	grpE	BCI_0612	CDS	19504	1375	19504	1375	14.1847	849.962
643689	644357	-	222	ung	BCI_0613	CDS	1548	22796	22796	1548	14.7261	886.027
644411	646060	-	549	nadB	BCI_0614	CDS	10325	22073	22073	10325	2.13782	346.921
644625	645026	+	401	predicted_RNA	pRNA17	RNA	13080	0	13080	0	13080	281.452
646228	646303	-	76	Met_tRNA1	BCI_0615	RNA	22	828	828	22	37.6364	94.0065
646370	648208	-	612	rpoD	BCI_0616	CDS	5808	116192	116192	5808	20.0055	1638.2
648290	650077	-	595	dnaG	BCI_0617	CDS	3351	46695	46695	3351	13.9346	677.165
650171	650440	-	71	rpsU	BCI_0618	CDS	2146	8601	8601	2146	4.00792	1045.28
650587	651612	+	341	gcp	BCI_0619	CDS	41747	302	41747	302	138.235	1056.36
651654	652019	+	121	folB	BCI_0620	CDS	9338	108	9338	108	86.463	665.901
652158	652985	+	275	BCI_0621	BCI_0621	CDS	28833	4330	28833	4330	6.65889	904.687
653051	654289	-	412	cca	BCI_0622	CDS	28647	53999	53999	28647	1.88498	1130.91
655168	655803	+	211	ribB	BCI_0623	CDS	40968	1569	40968	1569	26.1109	1675.34
655968	656717	-	249	plsC	BCI_0624	CDS	5981	16022	16022	5981	2.67882	555.212
656963	657370	-	135	holD	BCI_0625	CDS	9066	631	631	9066	0.0696007	40.3308
657007	657212	+	205	predicted_RNA	pRNA18	RNA	7017	517	7017	517	13.5725	295.351
657363	659153	-	591	deaD	BCI_0626	CDS	3754	46738	46738	3754	12.4502	682.376
659552	661645	-	697	pnp	BCI_0627	CDS	5079	186034	186034	5079	36.6281	2303.04
661756	662061	-	101	rpsO	BCI_0628	CDS	229	50811	50811	229	221.882	4340.88
662146	663099	-	317	truB	BCI_0629	CDS	1257	28555	28555	1257	22.7168	777.256
663102	663506	-	134	rbfA	BCI_0630	CDS	1244	12274	12274	1244	9.86656	790.356
663575	666217	-	880	infB	BCI_0631	CDS	4000	109625	109625	4000	27.4062	1074.9
666244	667731	-	495	nusA	BCI_0632	CDS	610	44708	44708	610	73.2918	779.33
667937	668013	-	77	Met_tRNA2	BCI_0633	RNA	1	4399	4399	1	4399	492.952
668074	668164	-	91	Leu_tRNA4	BCI_0634	RNA	28	5854	5854	28	209.071	555.076
668231	668509	-	92	secG	BCI_0635	CDS	689	19497	19497	689	28.2975	1828.61
668611	669948	-	445	glmM	BCI_0636	CDS	668	42532	42532	668	63.6707	824.702
669945	670811	-	288	folP	BCI_0637	CDS	2094	36638	36638	2094	17.4967	1097.69
670920	672803	-	627	ftsH	BCI_0638	CDS	3024	118451	118451	3024	39.1703	1630.09
672862	673491	-	209	rrmJ	BCI_0639	CDS	1092	60777	60777	1092	55.6566	2509.19
673768	674244	-	158	greA	BCI_0640	CDS	561	63814	63814	561	113.75	3484.98
674447	675874	+	475	dacB	BCI_0641	CDS	20013	37841	20013	37841	0.528871	363.546
675884	676894	-	336	obgE	BCI_0642	CDS	1869	68034	68034	1869	36.4013	1747.14
676946	677200	-	84	rpmA	BCI_0643	CDS	962	19456	19456	962	20.2245	1998.55
677215	677526	-	103	rplU	BCI_0644	CDS	999	25732	25732	999	25.7578	2155.65
677988	679151	+	387	pgk	BCI_0645	CDS	32361	6081	32361	6081	5.32166	721.526
679230	680306	+	358	fbaA	BCI_0646	CDS	30957	1710	30957	1710	18.1035	746.134
680448	681119	+	223	rpiA	BCI_0647	CDS	18916	4512	18916	4512	4.19238	731.923
681172	681780	-	202	BCI_0648	BCI_0648	CDS	3539	8063	8063	3539	2.27833	344.418
681939	682742	-	267	thiD	BCI_0649	CDS	2603	41287	41287	2603	15.8613	1334.27
682912	684492	-	526	guaA	BCI_0650	CDS	5255	105605	105605	5255	20.0961	1732.37
684542	685999	-	485	guaB	BCI_0651	CDS	813	126733	126733	813	155.883	2254.7

## Sheet: Baum_yellow_rep2
start	end	strand	length	gene	synonym	type	reads_fwd	reads_rev	sense_counts	anti_counts	diff_mag	tpm
197	1720	+	507	mqo	BCI_0001	CDS	7541	899	7541	899	8.38821	808.405
1921	2159	-	238	predicted_RNA	pRNA1	RNA	17	3382	3382	17	198.941	772.334
1933	5826	+	1297	purL	BCI_0002	CDS	14122	421	14122	421	33.5439	591.786
5880	6356	+	158	BCI_0003	BCI_0003	CDS	356	501	356	501	0.710579	122.462
6569	7822	+	417	glyA	BCI_0004	CDS	9948	316	9948	316	31.481	1296.61
7855	8661	-	268	suhB	BCI_0005	CDS	224	5405	5405	224	24.1295	1096.15
8964	10118	+	384	iscS	BCI_0006	CDS	7083	242	7083	242	29.2686	1002.52
10151	10585	+	144	ndk	BCI_0007	CDS	3322	89	3322	89	37.3258	1253.85
10933	12054	+	373	ispG	BCI_0008	CDS	71994	93	71994	93	774.129	10490.5
12077	13369	+	430	hisS	BCI_0009	CDS	10447	705	10447	705	14.8184	1320.48
13440	14615	+	391	yfgl	BCI_0010	CDS	3262	525	3262	525	6.21333	453.435
14634	16052	+	472	engA	BCI_0011	CDS	5235	1596	5235	1596	3.28008	602.813
16150	17811	+	553	pgi	BCI_0012	CDS	10756	435	10756	435	24.7264	1057.14
18124	19740	-	538	pckA	BCI_0013	CDS	575	2270	2270	575	3.94783	229.325
20049	20594	+	181	nudE	BCI_0014	CDS	1270	76	1270	76	16.7105	381.358
20778	21935	+	385	metK	BCI_0015	CDS	3361	154	3361	154	21.8247	474.478
21979	22887	-	302	metR	BCI_0016	CDS	802	893	893	802	1.11347	160.714
22990	25284	+	764	metE	BCI_0017	CDS	76993	254	76993	254	303.122	5477.3
25374	25569	-	195	predicted_RNA	pRNA2	RNA	50	2085	2085	50	41.7	581.139
25559	27043	+	494	rmuc	BCI_0018	CDS	2638	612	2638	612	4.31046	290.239
27142	28062	-	306	metA	BCI_0019	CDS	398	597	597	398	1.5	106.038
28316	30781	-	821	plsB	BCI_0020	CDS	1888	4352	4352	1888	2.30508	288.107
30959	31975	-	338	trpS	BCI_0021	CDS	974	8745	8745	974	8.97844	1406.21
32055	32750	-	231	rpe	BCI_0022	CDS	659	6148	6148	659	9.32929	1446.54
32844	33923	-	359	aroB	BCI_0023	CDS	180	4832	4832	180	26.8444	731.545
33928	34449	-	173	aroK	BCI_0024	CDS	29	2964	2964	29	102.207	931.194
34736	36097	-	453	pssA	BCI_0025	CDS	788	867	867	788	1.10025	104.023
36278	36928	-	216	dedA	BCI_0026	CDS	2371	1054	1054	2371	0.444538	265.213
37462	37825	-	363	Rnase P	pRNA3	RNA	262	246471	246471	262	940.729	36903.5
38198	38455	+	85	bolA	BCI_0027	CDS	1324	59	1324	59	22.4407	846.598
38523	39779	+	418	murA	BCI_0028	CDS	5165	255	5165	255	20.2549	671.587
39828	41210	-	460	degQ	BCI_0029	CDS	394	2962	2962	394	7.51777	349.974
41305	41712	-	135	hyp_1	BCI_0030	CDS	72	1002	1002	72	13.9167	403.406
41948	42376	+	142	rplM	BCI_0031	CDS	10127	49	10127	49	206.673	3876.15
42396	42794	+	132	rpsI	BCI_0032	CDS	11070	37	11070	37	299.189	4558.08
43254	43748	+	164	hyp_2	BCI_0033	CDS	382	26	382	26	14.6923	126.598
44259	45017	+	253	hyp_3	gene	CDS	680	144	680	144	4.72222	146.082
45160	46740	+	526	purH	BCI_0035	CDS	4831	353	4831	353	13.6856	499.183
46761	48035	+	424	purD	BCI_0036	CDS	8156	663	8156	663	12.3017	1045.49
48145	48624	-	159	hsp	BCI_0037	CDS	97	58944	58944	97	607.67	20148.9
48741	49643	-	300	hyp_4	BCI_0038	CDS	176	49039	49039	176	278.631	8884.41
49666	50199	-	177	nuc	BCI_0039	CDS	95	10334	10334	95	108.779	3173.24
50301	50585	-	94	hup	BCI_0040	CDS	38	2117	2117	38	55.7105	1224.06
51328	53226	+	633	thiC	BCI_0041	CDS	3241	200	3241	200	16.205	278.281
53213	53857	+	214	thiE	BCI_0042	CDS	961	130	961	130	7.39231	244.072
53850	54623	+	257	thiF	BCI_0043	CDS	1933	337	1933	337	5.73591	408.796
54623	54823	+	66	thiS	BCI_0044	CDS	650	8	650	8	81.25	535.276
54827	55606	+	259	thiG	BCI_0045	CDS	6195	89	6195	89	69.6067	1300.02
55603	56751	+	382	thiH	BCI_0046	CDS	2857	2082	2857	2082	1.37224	406.495
56812	57288	-	158	mreD	BCI_0047	CDS	58	1232	1232	58	21.2414	423.801
57447	58313	-	288	mreC	BCI_0048	CDS	115	10201	10201	115	88.7043	1925.12
58348	59391	-	347	mreB	BCI_0049	CDS	72	5468	5468	72	75.9444	856.46
59747	60250	+	167	aroQ	BCI_0050	CDS	1626	95	1626	95	17.1158	529.191
60272	60724	+	150	accB	BCI_0051	CDS	1711	20	1711	20	85.55	619.965
60733	62082	+	449	accC	BCI_0052	CDS	4544	113	4544	113	40.2124	550.048
62339	62974	-	211	marC	BCI_0053	CDS	868	830	830	868	0.956221	213.798
63371	65458	+	695	prlC	BCI_0054	CDS	2998	1113	2998	1113	2.69362	234.453
65455	67029	-	524	pitA	BCI_0055	CDS	278	1654	1654	278	5.94964	171.559
67592	68656	+	354	ftsY	BCI_0056	CDS	3152	94	3152	94	33.5319	483.94
68669	69310	+	213	ftsE	BCI_0057	CDS	2911	106	2911	106	27.4623	742.798
69330	70280	+	316	ftsX	BCI_0058	CDS	6706	498	6706	498	13.4659	1153.41
70343	71203	+	286	rpoH	BCI_0059	CDS	6035	73	6035	73	82.6712	1146.88
71376	72095	+	239	fre	BCI_0060	CDS	3949	158	3949	158	24.9937	898.044
72230	73165	+	311	hemC	BCI_0061	CDS	3677	57	3677	57	64.5088	642.601
73173	73913	+	246	hemD	BCI_0062	CDS	2688	223	2688	223	12.0538	593.885
73928	75448	-	506	lnt	BCI_0063	CDS	1841	1732	1732	1841	0.940793	186.04
75494	75961	-	155	hyp_5	BCI_0064	CDS	40	2068	2068	40	51.7	725.149
76001	77356	-	451	miaB	BCI_0065	CDS	53	11057	11057	53	208.623	1332.51
77544	79559	-	671	ligA	BCI_0066	CDS	209	3359	3359	209	16.0718	272.079
79623	80432	-	269	zipA	BCI_0067	CDS	105	834	834	105	7.94286	168.509
80668	81633	+	321	cysK	BCI_0068	CDS	2220	55	2220	55	40.3636	375.886
81807	82064	+	85	ptsH	BCI_0069	CDS	814	16	814	16	50.875	520.492
82117	83832	+	571	ptsI	BCI_0070	CDS	3752	707	3752	707	5.30693	357.137
84144	84857	-	237	purC	BCI_0071	CDS	88	1418	1418	88	16.1136	325.189
85387	86463	+	358	purM	BCI_0072	CDS	10822	95	10822	95	113.916	1642.98
86454	87113	+	219	purN	BCI_0073	CDS	4410	385	4410	385	11.4545	1094.47
87324	89411	+	695	ppk	BCI_0074	CDS	1923	2286	1923	2286	0.841207	150.384
89439	91436	-	665	tktA	BCI_0075	CDS	180	17370	17370	180	96.5	1419.67
91457	92410	-	317	talB	BCI_0076	CDS	287	11730	11730	287	40.8711	2011.16
92901	93731	+	276	cysT	BCI_0077	CDS	461	112	461	112	4.11607	90.7821
93740	94582	+	280	cysW	BCI_0078	CDS	601	346	601	346	1.73699	116.661
94585	95718	+	377	cysA	BCI_0079	CDS	2541	367	2541	367	6.92371	366.329
95991	96179	+	62	rnfB	BCI_0080	CDS	131	177	131	177	0.740113	114.839
96281	97555	-	424	tyrS	BCI_0081	CDS	784	2843	2843	784	3.62628	364.434
97591	98241	-	216	pdxH	BCI_0082	CDS	57	4363	4363	57	76.5439	1097.84
98475	98909	-	144	slyA	BCI_0083	CDS	78	5534	5534	78	70.9487	2088.74
99001	99099	-	32	hyp_6	BCI_0084	CDS	6	81	81	6	13.5	137.576
99313	99969	+	218	rnt	BCI_0085	CDS	2834	1939	2834	1939	1.46158	706.564
100009	100368	-	119	BCI_0086	BCI_0086	CDS	216	2087	2087	216	9.66204	953.199
100574	101197	-	207	ribE	BCI_0087	CDS	74	1899	1899	74	25.6622	498.612
101349	101425	+	77	Val_tRNA2	BCI_0088	RNA	5066	13	5066	13	389.692	3575.88
101593	101937	+	114	momp	BCI_0089	CDS	135890	417	135890	417	325.875	64787.5
102094	102165	-	72	Gln_tRNA	BCI_0090	RNA	89	647	647	89	7.26966	488.405
102178	102254	-	77	Met_tRNA	BCI_0091	RNA	33	1387	1387	33	42.0303	979.026
102263	102336	-	74	Gln_tRNA_2	BCI_0092	RNA	4	1014	1014	4	253.5	744.757
102388	102473	-	86	Leu_tRNA1	BCI_0093	RNA	5	402	402	5	80.4	254.06
102617	104287	+	556	glnS	BCI_0094	CDS	8890	293	8890	293	30.3413	869.031
104379	104909	-	176	fldA	BCI_0095	CDS	129	3083	3083	129	23.8992	952.071
105072	105818	+	248	hyp_7	BCI_0096	CDS	1329	89	1329	89	14.9326	291.26
106173	107354	+	393	sucC	BCI_0097	CDS	2645	212	2645	212	12.4764	365.798
107342	108226	+	294	sucD	BCI_0098	CDS	2975	107	2975	107	27.8037	549.981
108228	109292	+	355	nc_21	nc_21	RNA	2676	790	2676	790	3.38734	409.7
109297	110598	+	434	tolB_gene	tolB_gene	CDS	28	2523	2523	28	90.1071	315.963
109385	109607	-	222	predicted_RNA	pRNA4	RNA	358	2163	2163	358	6.0419	529.556
110638	111273	+	211	pal	BCI_0100	CDS	6350	49	6350	49	129.592	1635.68
111288	111935	+	215	hyp_8a	BCI_0101	CDS	8848	111	8848	111	79.7117	2236.74
111993	113039	+	348	nadA	BCI_0102	CDS	13896	511	13896	511	27.1937	2170.3
112996	114456	-	486	tilS	BCI_0103	CDS	888	9080	9080	888	10.2252	1015.45
114465	116123	-	552	antiporter	BCI_0104	CDS	212	10422	10422	212	49.1604	1026.17
116503	117357	-	284	ABC_trans	BCI_0105	CDS	142	4275	4275	142	30.1056	818.137
117359	118201	-	280	troB	BCI_0106	CDS	103	13324	13324	103	129.359	2586.34
118286	118783	-	165	ssb	BCI_0107	CDS	156	14540	14540	156	93.2051	4789.48
119426	120775	+	450	gltP_degen	gltP_degen	CDS	4998	312	4998	312	16.0192	603.659
121415	121840	+	141	BCI_0109	BCI_0109	CDS	12466	50	12466	50	249.32	4805.25
122087	122701	+	204	gmk	BCI_0110	CDS	4349	194	4349	194	22.4175	1158.69
122774	122971	+	65	rpoZ	BCI_0111	CDS	689	68	689	68	10.1324	576.122
123268	125367	+	699	recG	BCI_0112	CDS	5792	631	5792	631	9.17908	450.36
125425	126033	+	202	GTP-binding	BCI_0113	CDS	821	606	821	606	1.35479	220.902
126348	127268	-	306	polA	BCI_0114	CDS	416	2004	2004	416	4.81731	355.946
127464	128618	+	384	dnaX	BCI_0115	CDS	4735	377	4735	377	12.5597	670.189
128893	129231	+	112	hyp_8	BCI_0116	CDS	1408	107	1408	107	13.1589	683.271
129409	131304	+	631	htpG	BCI_0117	CDS	6758	230	6758	230	29.3826	582.099
131401	132042	+	213	adk	BCI_0118	CDS	4243	1288	4243	1288	3.29425	1082.68
132045	133118	-	357	purK	BCI_0119	CDS	603	7531	7531	603	12.4892	1146.55
133115	133624	-	169	purE	BCI_0120	CDS	12	4862	4862	12	405.167	1563.64
134028	135416	+	462	cysS	BCI_0121	CDS	5220	303	5220	303	17.2277	614.097
135430	136287	-	285	folD	BCI_0122	CDS	100	11946	11946	100	119.46	2278.17
136485	136562	+	78	Arg_tRNA1	BCI_0123	RNA	154	74	154	74	2.08108	107.309
136685	137890	-	402	cyaA_degen	cyaA_degen	CDS	3891	196	3891	196	19.852	526.07
137966	138790	+	274	dapF	BCI_0125	CDS	3346	530	3346	530	6.31321	663.718
138903	139619	+	238	BCI_0126	BCI_0126	CDS	2716	1076	2716	1076	2.52416	620.242
139475	139527	-	52	predicted_RNA	pRNA5	RNA	0	82	82	0	82	85.7075
139674	141614	+	646	uvrD	BCI_0127	CDS	9555	1218	9555	1218	7.84483	803.908
142061	143011	+	316	corA	BCI_0128	CDS	8580	398	8580	398	21.5578	1475.74
143038	143133	-	31	hyp_9	BCI_0129	CDS	228	91	91	228	0.399123	159.547
143136	144143	+	335	hyp_10	BCI_0130	CDS	1392	2301	1392	2301	0.604954	225.841
144158	146566	-	802	gyrB	BCI_0131	CDS	167	16812	16812	167	100.671	1139.34
146724	147836	-	370	dnaN	BCI_0132	CDS	158	9135	9135	158	57.8165	1341.88
148605	148748	+	47	rpmH	BCI_0133	CDS	728	27	728	27	26.963	841.864
148760	149107	+	115	rnpA	BCI_0134	CDS	1232	149	1232	149	8.26846	582.266
149083	149340	+	85	hyp_11	BCI_0135	CDS	1225	294	1225	294	4.16667	783.295
149236	149695	-	459	predicted_RNA	pRNA6	RNA	191	446	446	191	2.33508	52.8117
149343	150944	+	533	yidC	BCI_0136	CDS	3870	2192	3870	2192	1.76551	394.632
150941	152314	+	457	trmE	BCI_0137	CDS	2367	2810	2367	2810	0.842349	281.508
152320	154158	-	612	glmS	BCI_0138	CDS	364	14505	14505	364	39.8489	1288.17
154201	155610	-	469	glmU	BCI_0139	CDS	218	9427	9427	218	43.2431	1092.47
155664	156086	-	140	atpC	BCI_0140	CDS	7	2031	2031	7	290.143	788.479
156100	157473	-	457	atpD	BCI_0141	CDS	77	12373	12373	77	160.688	1471.52
157519	158382	-	287	atpG	BCI_0142	CDS	52	6711	6711	52	129.058	1270.91
158429	159970	-	513	atpA	BCI_0143	CDS	183	20801	20801	183	113.667	2203.81
159992	160525	-	177	atpH	BCI_0144	CDS	82	4987	4987	82	60.8171	1531.35
160548	161018	-	156	atpF	BCI_0145	CDS	37	3911	3911	37	105.703	1362.61
161047	161289	-	80	atpE	BCI_0146	CDS	24	1195	1195	24	49.7917	811.869
161326	162147	-	273	atpB	BCI_0147	CDS	163	1405	1405	163	8.61963	279.719
162235	164130	-	631	gidA	BCI_0148	CDS	1469	5501	5501	1469	3.74472	473.828
164177	165154	-	325	gcvT	BCI_0149	CDS	145	3909	3909	145	26.9586	653.718
165307	167034	+	575	recJ	BCI_0150	CDS	6045	113	6045	113	53.4956	571.395
167153	168076	+	308	prfB_degen	prfB_degen	CDS	1551	170	1551	170	9.12353	273.697
168085	169605	+	506	lysS	BCI_0152	CDS	3613	305	3613	305	11.8459	388.084
169659	170483	+	274	murI	BCI_0153	CDS	196	339	196	339	0.578171	38.8789
170754	172301	+	1548	rrsB	BCI_0509	CDS	0	0	0	0	0	0
172415	172487	+	73	Glu_tRNA	BCI_0508	RNA	0	0	0	0	0	0
172572	175473	+	2902	rrlB	BCI_0507	CDS	0	0	0	0	0	0
175506	175623	+	118	rrfB	BCI_0506	CDS	0	0	0	0	0	0
175644	175720	+	77	Asp_tRNA	BCI_0158	RNA	11	0	11	0	11	7.76444
175744	175820	+	77	Trp_tRNA	BCI_0159	RNA	35	3	35	3	11.6667	24.705
175857	177956	-	699	glyS	BCI_0160	CDS	992	5203	5203	992	5.24496	404.562
177962	178870	-	302	glyQ	BCI_0161	CDS	110	5256	5256	110	47.7818	945.925
179601	180509	-	302	metF	BCI_0162	CDS	139	340	340	139	2.44604	61.19
180690	181853	-	387	metB	BCI_0163	CDS	27	943	943	27	34.9259	132.437
181866	182486	+	207	metJ_degen	metJ_degen	CDS	1050	740	1050	740	1.41892	275.694
182488	182766	-	92	rpmE	BCI_0165	CDS	80	1908	1908	80	23.85	1127.19
182886	185000	+	704	priA	BCI_0166	CDS	4473	2243	4473	2243	1.9942	345.33
184682	184883	-	201	predicted_RNA	pRNA7	RNA	0	1366	1366	0	1366	369.371
185225	185767	+	180	hslV	BCI_0167	CDS	21859	32	21859	32	683.094	6600.34
185771	187111	+	446	hslU	BCI_0168	CDS	18743	26	18743	26	720.885	2284.09
187374	188144	+	256	tpiA	BCI_0169	CDS	2965	187	2965	187	15.8556	629.496
188146	189135	-	329	BCI_0170	BCI_0170	CDS	518	2392	2392	518	4.61776	395.161
189206	190168	-	320	pfkA	BCI_0171	CDS	28	3856	3856	28	137.714	654.931
190415	191230	-	271	cysE	BCI_0172	CDS	97	7590	7590	97	78.2474	1522.23
191281	192303	-	340	gpsA	BCI_0173	CDS	69	11789	11789	69	170.855	1884.54
192689	193120	-	143	BCI_0174	BCI_0174	CDS	46	3481	3481	46	75.6739	1323.05
193227	194444	+	405	M23	BCI_0175	CDS	2508	694	2508	694	3.61383	336.574
194716	195207	+	163	coaD	BCI_0176	CDS	644	345	644	345	1.86667	214.737
195204	196013	-	269	mutM	BCI_0177	CDS	96	13751	13751	96	143.24	2778.37
196074	196241	-	55	rpmG	BCI_0178	CDS	4	2999	2999	4	749.75	2963.62
196291	196518	-	75	rpmB	BCI_0179	CDS	10	2553	2553	10	255.3	1850.11
196617	197483	-	288	hyp_12	BCI_0180	CDS	299	5586	5586	299	18.6823	1054.18
197581	198222	+	213	pyrE	BCI_0181	CDS	902	573	902	573	1.57417	230.163
198277	198729	-	150	dut	BCI_0182	CDS	46	4719	4719	46	102.587	1709.89
198710	199924	-	404	dfp	BCI_0183	CDS	360	3149	3149	360	8.74722	423.643
200132	200208	-	77	Pro_tRNA1	BCI_0184	RNA	2	117	117	2	58.5	82.5854
200299	200387	-	89	Leu_tRNA2	BCI_0185	RNA	5	787	787	5	157.4	480.61
200410	200485	-	76	His_tRNA	BCI_0186	RNA	13	944	944	13	72.6154	675.098
200503	200580	-	78	Arg_tRNA2	BCI_0187	RNA	9	1623	1623	9	180.333	1130.92
200830	202089	-	419	rho	BCI_0188	CDS	73	25502	25502	73	349.342	3308.02
202183	202509	-	108	trxA	BCI_0189	CDS	176	7356	7356	176	41.7955	3701.91
202633	202971	-	112	hyp_13	BCI_0190	CDS	651	2327	2327	651	3.5745	1129.24
203304	204299	+	331	aroH	BCI_0191	CDS	664	112	664	112	5.92857	109.031
204398	205093	-	231	hyp_14	BCI_0192	CDS	252	717	717	252	2.84524	168.7
205192	206151	+	319	rluD	BCI_0193	CDS	2258	231	2258	231	9.77489	384.717
206158	208878	+	862	clpB	BCI_0194	CDS	23107	582	23107	582	39.7027	1456.95
208875	209222	-	115	rplS	BCI_0195	CDS	267	1662	1662	267	6.22472	785.491
209239	209997	-	252	trmD	BCI_0196	CDS	61	18329	18329	61	300.475	3953.18
210022	210549	-	175	rimM	BCI_0197	CDS	26	12761	12761	26	490.808	3963.28
210539	210805	-	88	rpsP	BCI_0198	CDS	12	5891	5891	12	490.917	3638.44
210902	212251	-	449	ffh	BCI_0199	CDS	63	4824	4824	63	76.5714	583.941
212407	212532	+	41	hyp_15	BCI_0200	CDS	101	15	101	15	6.73333	133.889
212553	214124	-	523	gshA	BCI_0201	CDS	1365	923	923	1365	0.67619	95.9198
214296	214372	-	77	Arg_tRNA3	BCI_0202	RNA	15	82	82	15	5.46667	57.8804
214380	214472	-	93	Ser_tRNA1	BCI_0203	RNA	7	193	193	7	27.5714	112.793
214670	214855	-	61	csrA	BCI_0204	CDS	378	459	459	378	1.21429	408.97
215037	217691	-	884	alaS	BCI_0205	CDS	172	14532	14532	172	84.4884	893.473
217939	219054	-	350	recA	BCI_0206	CDS	37	8020	8020	37	216.757	1245.42
219478	220260	+	260	BCI_0207	BCI_0207	CDS	1383	591	1383	591	2.3401	289.106
220287	220943	+	218	BCI_0208	BCI_0208	CDS	1948	98	1948	98	19.8776	485.669
221030	223597	+	855	mutS	BCI_0209	CDS	4740	393	4740	393	12.0611	301.315
223856	224332	-	158	ispF	BCI_0210	CDS	266	615	615	266	2.31203	211.556
224342	225067	-	241	ispD	BCI_0211	CDS	23	6694	6694	23	291.043	1509.65
225382	226005	-	207	cysC	BCI_0212	CDS	203	1171	1171	203	5.76847	307.464
226002	227444	-	480	cysN	BCI_0213	CDS	208	6435	6435	208	30.9375	728.644
227457	228365	-	302	cysD	BCI_0214	CDS	328	2547	2547	328	7.76524	458.385
228409	229797	-	462	cysG	BCI_0215	CDS	75	4255	4255	75	56.7333	500.571
229965	230702	-	245	cysH	BCI_0216	CDS	28	1449	1449	28	51.75	321.448
230716	232416	-	566	cysI	BCI_0217	CDS	106	2734	2734	106	25.7925	262.537
232416	234203	-	595	cysJ	BCI_0218	CDS	543	2987	2987	543	5.50092	272.852
234505	234894	+	129	BCI_0219	BCI_0219	CDS	1794	300	1794	300	5.98	755.859
234917	235588	-	223	hyp_16	BCI_0220	CDS	756	1876	1876	756	2.48148	457.232
235629	236930	-	433	eno	BCI_0221	CDS	91	8176	8176	91	89.8462	1026.27
236998	238629	-	543	pyrG	BCI_0222	CDS	114	11039	11039	114	96.8333	1104.94
238738	239628	-	297	relA_degen	relA_degen	CDS	1207	897	897	1207	0.743165	164.151
239976	240665	+	229	pfs	BCI_0224	CDS	2143	4775	2143	4775	0.448796	508.622
240709	241056	-	115	hesB	BCI_0225	CDS	35	1593	1593	35	45.5143	752.881
241062	242465	-	468	mrcB_degen	mrcB_degen	CDS	586	3596	3596	586	6.13652	417.621
242468	242923	+	151	dksA	BCI_0227	CDS	3144	42	3144	42	74.8571	1131.65
243094	244482	+	463	pcnB	BCI_0228	CDS	3825	766	3825	766	4.99347	449.013
244508	245011	+	167	folK	BCI_0229	CDS	1362	138	1362	138	9.86957	443.271
245068	245865	+	265	panB	BCI_0230	CDS	2395	140	2395	140	17.1071	491.211
245884	246741	+	285	panC	BCI_0231	CDS	1350	380	1350	380	3.55263	257.453
246940	249525	+	861	leuS	BCI_0232	CDS	6162	1306	6162	1306	4.71822	388.98
249742	250779	+	345	holA	BCI_0233	CDS	2247	658	2247	658	3.41489	353.991
250772	251425	+	217	nadD	BCI_0234	CDS	418	2003	418	2003	0.208687	104.695
251137	252035	-	898	predicted_RNA	pRNA8	RNA	21	8412	8412	21	400.571	509.133
251496	253361	+	621	mrdA	BCI_0235	CDS	3760	3207	3760	3207	1.17244	329.082
253375	254466	+	363	mrdB	BCI_0236	CDS	5369	273	5369	273	19.6667	803.887
254594	255277	+	227	lipB	BCI_0237	CDS	7862	77	7862	77	102.104	1882.42
255313	256197	+	294	lipA	BCI_0238	CDS	4517	39	4517	39	115.821	835.047
256361	257662	+	411	mdtH	BCI_0239	CDS	983	336	983	336	2.9256	129.993
257862	258425	+	187	pgsA	BCI_0240	CDS	845	765	845	765	1.10458	245.597
258467	258541	+	75	Gly_tRNA2	BCI_0241	RNA	528	4	528	4	132	382.632
258685	258755	+	71	Cys_tRNA	BCI_0242	RNA	493	4	493	4	123.25	377.396
258769	258854	+	86	Leu_tRNA3	BCI_0243	RNA	513	27	513	27	19	324.211
258950	259951	+	333	pgl	BCI_0244	CDS	1750	1637	1750	1637	1.06903	285.629
259963	261264	-	433	bioA	BCI_0245	CDS	442	307	307	442	0.69457	38.5353
261372	262400	+	342	bioB	BCI_0246	CDS	2375	236	2375	236	10.0636	377.438
262397	263575	+	392	bioF	BCI_0247	CDS	3992	848	3992	848	4.70755	553.494
263562	264323	+	253	bioC	BCI_0248	CDS	1573	17	1573	17	92.5294	337.922
264316	264993	+	225	bioD	BCI_0249	CDS	1808	178	1808	178	10.1573	436.741
265418	266218	+	253	BCI_0250	BCI_0250	CDS	1907	218	1907	218	8.74771	409.674
266278	266991	+	237	gpmA	BCI_0251	CDS	3098	122	3098	122	25.3934	710.463
266998	268089	+	363	serC	BCI_0252	CDS	4535	327	4535	327	13.8685	679.014
268184	269470	+	428	aroA	BCI_0253	CDS	3752	367	3752	367	10.2234	476.461
269532	270209	+	225	cmk	BCI_0254	CDS	4926	67	4926	67	73.5224	1189.93
270342	272018	+	558	rpsA	BCI_0255	CDS	46093	74	46093	74	622.878	4489.61
272214	272378	+	54	hyp_17	BCI_0256	CDS	1499	135	1499	135	11.1037	1508.75
272440	273111	-	223	dsbA	BCI_0257	CDS	944	1585	1585	944	1.67903	386.307
273459	274484	+	341	pyrB	BCI_0258	CDS	2024	2258	2024	2258	0.896368	322.6
274498	274968	+	156	pyrI	BCI_0259	CDS	1619	291	1619	291	5.56357	564.067
275014	275409	+	131	L-PSP	BCI_0260	CDS	2499	727	2499	727	3.43741	1036.82
275505	275774	-	69	cspE	BCI_0261	CDS	34	29057	29057	34	854.618	22888.1
276002	276718	+	238	exsB	BCI_0262	CDS	8695	111	8695	111	78.3333	1985.64
276746	279100	-	784	lon	BCI_0263	CDS	1087	45259	45259	1087	41.6366	3137.6
279309	280574	-	421	clpX	BCI_0264	CDS	361	11406	11406	361	31.5956	1472.51
280711	281328	-	205	clpP	BCI_0265	CDS	164	13408	13408	164	81.7561	3554.83
281550	282860	-	436	tig	BCI_0266	CDS	283	3355	3355	283	11.8551	418.229
283346	284260	+	304	cyoA	BCI_0267	CDS	14165	67	14165	67	211.418	2532.51
284291	286288	+	665	cyoB	BCI_0268	CDS	19328	258	19328	258	74.9147	1579.7
286275	286886	+	203	cyoC	BCI_0269	CDS	3037	78	3037	78	38.9359	813.124
286891	287238	+	116	hypo_1	hypo_1	CDS	936	105	936	105	8.91429	438.557
287238	288104	+	288	cyoE	BCI_0270	CDS	2416	432	2416	432	5.59259	455.945
288133	289542	+	469	BCI_0271	BCI_0271	CDS	6589	335	6589	335	19.6687	763.581
289571	290440	+	289	panE	BCI_0272	CDS	1582	1207	1582	1207	1.31069	297.521
290454	290750	-	98	thiI	BCI_0273	CDS	211	1166	1166	211	5.52607	646.667
291134	292048	+	304	ispA	BCI_0274	CDS	3447	131	3447	131	26.313	616.277
292057	293958	+	623	dxs	BCI_0275	CDS	5897	242	5897	242	24.3678	514.46
294028	295764	+	578	argS	BCI_0276	CDS	5681	704	5681	704	8.0696	534.202
295815	297341	-	508	mviN	BCI_0277	CDS	4101	3311	3311	4101	0.807364	354.245
297338	297778	-	146	acpS	BCI_0278	CDS	79	2539	2539	79	32.1392	945.188
297778	298509	-	243	pdxJ	BCI_0279	CDS	48	4502	4502	48	93.7917	1006.95
298643	299548	-	301	era	BCI_0280	CDS	206	4363	4363	206	21.1796	787.82
299551	300228	-	225	rnc	BCI_0281	CDS	78	2512	2512	78	32.2051	606.8
300268	301203	-	311	lepB	BCI_0282	CDS	286	2090	2090	286	7.30769	365.253
301212	303020	-	602	lepA	BCI_0283	CDS	58	21770	21770	58	375.345	1965.49
303208	303283	+	76	Thr_tRNA1	BCI_0284	RNA	142	308	142	308	0.461039	101.551
303301	306174	-	957	valS	BCI_0285	CDS	1867	9616	9616	1867	5.15051	546.123
306184	306648	-	154	holC	BCI_0286	CDS	193	1194	1194	193	6.18653	421.397
306672	308174	-	500	pepA	BCI_0287	CDS	93	19777	19777	93	212.656	2149.8
308547	309401	+	284	nadE	BCI_0288	CDS	2750	89	2750	89	30.8989	526.287
309469	310314	-	281	hemK	BCI_0289	CDS	191	1472	1472	191	7.70681	284.715
310311	311411	-	366	prfA	BCI_0290	CDS	760	7554	7554	760	9.93947	1121.77
311719	312366	+	215	lolB	BCI_0291	CDS	5555	381	5555	381	14.5801	1404.28
312363	313238	+	291	ispE	BCI_0292	CDS	5172	337	5172	337	15.3472	965.993
313291	314229	+	312	prsA	BCI_0293	CDS	5812	366	5812	366	15.8798	1012.46
314339	314920	+	193	pth	BCI_0294	CDS	1804	749	1804	749	2.40854	508.028
314970	316040	+	356	ychF	BCI_0295	CDS	4007	214	4007	214	18.7243	611.755
316118	316906	+	262	fabI	BCI_0296	CDS	4465	55	4465	55	81.1818	926.25
317059	318996	+	645	rnb	BCI_0297	CDS	7328	94	7328	94	77.9574	617.496
319003	319752	-	249	pyrF	BCI_0298	CDS	416	1158	1158	416	2.78365	252.765
319787	320101	-	98	hyp_18	BCI_0299	CDS	29	649	649	29	22.3793	359.937
320418	321017	+	199	ribA	BCI_0300	CDS	215	103	215	103	2.08738	58.721
321060	322034	-	324	cysB	BCI_0301	CDS	203	1117	1117	203	5.50246	187.377
322283	324856	-	857	topA	BCI_0302	CDS	1121	8306	8306	1121	7.40946	526.768
325306	326070	+	254	hyp_19	BCI_0303	CDS	459	330	459	330	1.39091	98.2171
326265	326567	+	100	hyp_20	BCI_0304	CDS	279	20	279	20	13.95	151.64
326729	328180	+	483	cls	BCI_0305	CDS	842	159	842	159	5.2956	94.7487
328635	329045	+	136	hns	BCI_0306	CDS	1762	292	1762	292	6.03425	704.166
329091	329966	-	291	htpX	BCI_0307	CDS	1305	4365	4365	1305	3.34483	815.266
330171	330659	-	162	ftn	BCI_0308	CDS	125	2519	2519	125	20.152	845.126
330747	332225	-	492	zwf	BCI_0309	CDS	151	12936	12936	151	85.6689	1429.04
332634	334097	+	483	pykA	BCI_0310	CDS	4825	65	4825	65	74.2308	542.948
334517	335866	+	449	BCI_0311	BCI_0311	CDS	2249	225	2249	225	9.99556	272.24
336040	337047	-	335	ruvB	BCI_0312	CDS	235	3094	3094	235	13.166	501.977
337056	337646	-	196	ruvA	BCI_0313	CDS	309	1127	1127	309	3.64725	312.519
337688	338209	-	173	ruvC	BCI_0314	CDS	1143	1650	1650	1143	1.44357	518.377
338703	340472	-	589	aspS	BCI_0315	CDS	466	5638	5638	466	12.0987	520.257
340697	341431	-	244	BCI_0316	BCI_0316	CDS	222	5664	5664	222	25.5135	1261.66
341666	341755	+	90	Ser_tRNA2	BCI_0317	RNA	278	55	278	55	5.05455	167.884
341775	343067	-	430	serS	BCI_0318	CDS	1020	3135	3135	1020	3.07353	396.257
343217	343843	-	208	lolA	BCI_0319	CDS	13	1084	1084	13	83.3846	283.253
343945	345972	-	666	ftsK	BCI_0320	CDS	615	1884	1884	615	3.06341	153.75
346139	347098	+	319	trxB	BCI_0321	CDS	2918	462	2918	462	6.31602	497.168
347213	347431	+	72	infA	BCI_0322	CDS	746	23	746	23	32.4348	563.138
347607	348335	+	242	artP	BCI_0323	CDS	4415	262	4415	262	16.8511	991.571
348356	349084	+	242	artI	BCI_0324	CDS	4123	300	4123	300	13.7433	925.99
349081	349776	+	231	artQ	BCI_0325	CDS	2320	326	2320	326	7.11656	545.864
349798	350469	+	223	artM	BCI_0326	CDS	2000	152	2000	152	13.1579	487.454
350805	351116	+	103	rpsJ	BCI_0327	CDS	12708	17	12708	17	747.529	6705.76
351142	351780	+	212	rplC	BCI_0328	CDS	26353	68	26353	68	387.544	6756.2
351792	352397	+	201	rplD	BCI_0329	CDS	20773	87	20773	87	238.77	5617.09
352394	352696	+	100	rplW	BCI_0330	CDS	10422	221	10422	221	47.1584	5664.47
352716	353534	+	272	rplB	BCI_0331	CDS	37689	372	37689	372	101.315	7531.02
353556	353834	+	92	rpsS	BCI_0332	CDS	10765	22	10765	22	489.318	6359.67
353865	354197	+	110	rplV	BCI_0333	CDS	13507	20	13507	20	675.35	6673.82
354214	354915	+	233	rpsC	BCI_0334	CDS	39535	68	39535	68	581.397	9222.19
354927	355340	+	137	rplP	BCI_0335	CDS	27407	19	27407	19	1442.47	10873
355337	355528	+	63	rpmC	BCI_0336	CDS	12799	12	12799	12	1066.58	11041.9
355521	355790	+	89	rpsQ	BCI_0337	CDS	21252	67	21252	67	317.194	12978.3
355831	356313	+	160	rplN	BCI_0338	CDS	2761	56	2761	56	49.3036	937.896
356325	356639	+	104	rplX	BCI_0339	CDS	2682	9	2682	9	298	1401.63
356663	357208	+	181	rplE	BCI_0340	CDS	5412	32	5412	32	169.125	1625.13
357231	357536	+	101	rpsN	BCI_0341	CDS	4491	6	4491	6	748.5	2416.74
357569	357967	+	132	rpsH	BCI_0342	CDS	4159	14	4159	14	297.071	1712.47
357982	358515	+	177	rp1F	BCI_0343	CDS	5077	96	5077	96	52.8854	1558.99
358529	358876	+	115	rplR	BCI_0344	CDS	3928	15	3928	15	261.867	1856.44
358888	359391	+	167	rpsE	BCI_0345	CDS	4607	49	4607	49	94.0204	1499.37
359395	359577	+	60	rpmD	BCI_0346	CDS	1832	20	1832	20	91.6	1659.52
359578	360009	+	143	rplO	BCI_0347	CDS	4345	18	4345	18	241.389	1651.44
360025	361359	+	444	secY	BCI_0348	CDS	13033	112	13033	112	116.366	1595.4
361397	361513	+	38	rpmJ	BCI_0349	CDS	1096	11	1096	11	99.6364	1567.6
361539	361895	+	118	rpsM	BCI_0350	CDS	4736	15	4736	15	315.733	2181.41
361920	362309	+	129	rpsK	BCI_0351	CDS	4972	32	4972	32	155.375	2094.83
362356	362976	+	206	rpsD	BCI_0352	CDS	7392	134	7392	134	55.1642	1950.31
362997	363980	+	327	rpoA	BCI_0353	CDS	12216	899	12216	899	13.5884	2030.44
364044	364430	+	128	rplQ	BCI_0354	CDS	3469	390	3469	390	8.89487	1473
364453	364530	-	78	Thr_tRNA2	BCI_0355	RNA	120	259	259	120	2.15833	180.473
364558	364629	-	72	Gly_tRNA	BCI_0356	RNA	17	317	317	17	18.6471	239.296
364646	364727	-	82	Tyr_tRNA	BCI_0357	RNA	21	484	484	21	23.0476	320.804
364746	364818	-	73	Thr_tRNA	BCI_0358	RNA	37	246	246	37	6.64865	183.156
365098	366036	+	312	coaA	BCI_0359	CDS	538	577	538	577	0.932409	93.7208
366098	367033	+	311	prmB	BCI_0360	CDS	2430	93	2430	93	26.129	424.673
367048	368115	+	355	aroC	BCI_0361	CDS	2374	37	2374	37	64.1622	363.463
368366	369586	+	406	fabB	BCI_0362	CDS	5838	40	5838	40	145.95	781.531
369660	370790	+	376	pdxB	BCI_0363	CDS	7797	184	7797	184	42.375	1127.06
370798	371601	+	267	truA	BCI_0364	CDS	5360	179	5360	179	29.9441	1091.09
371713	372600	+	295	accD	BCI_0365	CDS	6206	249	6206	249	24.9237	1143.4
372643	373923	+	426	folC	BCI_0366	CDS	2894	666	2894	666	4.34535	369.23
374317	374802	+	161	cvpA	BCI_0367	CDS	1184	25	1184	25	47.36	399.7
374842	376260	+	472	purF	BCI_0368	CDS	3426	205	3426	205	16.7122	394.506
376380	377834	-	484	nuoN	BCI_0369	CDS	1368	2014	2014	1368	1.47222	226.163
377693	377763	+	70	predicted_RNA	pRNA9	RNA	83	23	83	23	3.6087	64.4449
377859	379382	-	507	nuoM	BCI_0370	CDS	1691	4883	4883	1691	2.88764	523.464
379358	379507	+	149	predicted_RNA	pRNA10	RNA	877	1346	877	1346	0.65156	319.905
379432	381297	-	621	nuoL	BCI_0371	CDS	1326	9864	9864	1326	7.43891	863.316
381294	381596	-	100	nuoK	BCI_0372	CDS	61	1451	1451	61	23.7869	788.634
381644	382141	-	165	nuoJ	BCI_0373	CDS	77	6254	6254	77	81.2208	2060.07
382165	382707	-	180	nuoI	BCI_0374	CDS	78	5671	5671	78	72.7051	1712.36
382731	383696	-	321	nuoH	BCI_0375	CDS	217	4663	4663	217	21.4885	789.53
383705	386434	-	909	nuoG	BCI_0376	CDS	873	18875	18875	873	21.6208	1128.58
386516	387850	-	444	nuoF	BCI_0377	CDS	24	8196	8196	24	341.5	1003.29
387847	388350	-	167	nuoE	BCI_0378	CDS	23	2769	2769	23	120.391	901.187
388353	390140	-	595	nuoCD	BCI_0379	CDS	485	10399	10399	485	21.4412	949.911
390249	390923	-	224	nuoB	BCI_0380	CDS	97	10729	10729	97	110.608	2603.27
390987	391373	-	128	nuoA	BCI_0381	CDS	459	4472	4472	459	9.74292	1898.89
391621	392823	+	400	ackA	BCI_0382	CDS	5206	399	5206	399	13.0476	707.379
392877	395012	+	711	pta	BCI_0383	CDS	3785	7257	3785	7257	0.521565	289.337
395031	395297	-	88	BCI_0384	BCI_0384	CDS	198	2925	2925	198	14.7727	1806.56
395299	396429	-	376	nrdB	BCI_0385	CDS	128	11393	11393	128	89.0078	1646.87
396480	398762	-	760	nrdA	BCI_0386	CDS	324	16118	16118	324	49.7469	1152.67
399298	401841	+	847	gyrA	BCI_0387	CDS	55916	431	55916	431	129.735	3588.07
402170	403297	+	375	ddlA	BCI_0388	CDS	11579	236	11579	236	49.0636	1678.22
403289	403362	-	74	Pro_tRNA	BCI_0389	RNA	103	135	135	103	1.31068	99.154
403459	403743	-	94	rplY	BCI_0390	CDS	398	2408	2408	398	6.05025	1392.31
403876	404463	-	195	nlpC	BCI_0391	CDS	337	1940	1940	337	5.75668	540.724
404495	405373	-	292	nfo	BCI_0392	CDS	40	2504	2504	40	62.6	466.079
405526	407004	+	492	lysP	BCI_0393	CDS	3872	164	3872	164	23.6098	427.739
407148	407810	+	220	folE	BCI_0394	CDS	1266	584	1266	584	2.16781	312.766
407840	408421	-	193	dcd	BCI_0395	CDS	80	2888	2888	80	36.1	813.295
408614	410257	+	547	metG	BCI_0396	CDS	11222	3646	11222	3646	3.07789	1115.04
410283	411689	-	468	gnd	BCI_0397	CDS	1067	6477	6477	1067	6.07029	752.205
411892	412515	-	207	hisI	BCI_0398	CDS	538	2942	2942	538	5.4684	772.468
412509	413285	-	258	hisF	BCI_0399	CDS	19	3747	3747	19	197.211	789.355
413267	414013	-	248	hisA	BCI_0400	CDS	25	4373	4373	25	174.92	958.376
414016	414609	-	197	hisH	BCI_0401	CDS	9	3172	3172	9	352.444	875.135
414606	415676	-	356	hisB	BCI_0402	CDS	69	5486	5486	69	79.5072	837.556
415682	416764	-	360	hisC	BCI_0403	CDS	827	3184	3184	827	3.85006	480.705
416761	418074	-	437	hisD	BCI_0404	CDS	289	2780	2780	289	9.61938	345.758
418078	418977	-	299	hisG	BCI_0405	CDS	342	2471	2471	342	7.22515	449.169
419623	420252	+	209	BCI_0406	BCI_0406	CDS	5502	87	5502	87	63.2414	1430.81
420279	421469	-	396	aspC	BCI_0407	CDS	1791	1230	1230	1791	0.686767	168.818
421550	422953	-	467	asnC	BCI_0408	CDS	97	4488	4488	97	46.268	522.329
423379	424389	+	336	pyrD	BCI_0409	CDS	17026	243	17026	243	70.0658	2754.11
424522	425043	-	173	fabA	BCI_0410	CDS	132	965	965	132	7.31061	303.172
425090	426844	-	584	hyp_21	BCI_0411	CDS	140	4449	4449	140	31.7786	414.055
427111	427428	-	105	hspQ	BCI_0412	CDS	159	5477	5477	159	34.4465	2835.06
427534	428025	-	163	dsvC	BCI_0413	CDS	82	851	851	82	10.378	283.759
428047	428131	+	85	Ser_tRNA	BCI_0414	RNA	447	5	447	5	89.4	285.823
428219	429154	-	311	fmt	BCI_0415	CDS	1905	2116	2116	1905	1.11076	369.797
429204	429707	-	167	def	BCI_0416	CDS	134	952	952	134	7.10448	309.834
429939	430535	+	198	hyp_22	BCI_0417	CDS	3128	114	3128	114	27.4386	858.637
430619	431383	+	254	aroE	BCI_0418	CDS	1567	161	1567	161	9.73292	335.308
431428	434919	-	1163	BCI_0419	BCI_0419	CDS	1330	7487	7487	1330	5.62932	349.894
434949	436340	-	463	fumC	BCI_0420	CDS	530	3034	3034	530	5.72453	356.158
436947	437022	+	76	Asn_tRNA	BCI_0421	RNA	624	12	624	12	52	446.251
437173	438279	+	368	trmU	BCI_0422	CDS	13520	861	13520	861	15.7027	1996.81
438606	439997	+	463	purB	BCI_0423	CDS	7217	1494	7217	1494	4.83066	847.196
440033	441280	-	415	lolE	BCI_0424	CDS	332	2618	2618	332	7.88554	342.87
441277	441987	-	236	lolD	BCI_0425	CDS	279	1655	1655	279	5.9319	381.149
441980	443173	-	397	lolC	BCI_0426	CDS	138	3278	3278	138	23.7536	448.773
443281	443814	-	177	BCI_0427	BCI_0427	CDS	49	3470	3470	49	70.8163	1065.53
443829	444194	-	121	BCI_0428	BCI_0428	CDS	25	1477	1477	25	59.08	663.443
444191	444991	-	266	BCI_0429	BCI_0429	CDS	754	4036	4036	754	5.35279	824.665
445036	446034	-	332	holB	BCI_0430	CDS	607	5712	5712	607	9.41021	935.101
446037	446675	-	212	tmk	BCI_0431	CDS	358	1729	1729	358	4.82961	443.269
446730	447533	-	267	pabC	BCI_0432	CDS	62	3803	3803	62	61.3387	774.147
447634	447867	-	77	acpP	BCI_0433	CDS	54	12700	12700	54	235.185	8964.4
448023	448757	-	244	fabG	BCI_0434	CDS	148	12460	12460	148	84.1892	2775.47
448741	449703	-	320	fabD	BCI_0435	CDS	587	11871	11871	587	20.2232	2016.26
449723	450676	-	317	fabH	BCI_0436	CDS	47	24074	24074	47	512.213	4127.6
450723	450824	+	33	hyp_23	BCI_0437	CDS	2	614	2	614	0.00325733	3.29401
451081	451251	-	56	rpmF	BCI_0438	CDS	29	711	711	29	24.5172	690.065
451394	452362	-	322	rluC	BCI_0439	CDS	835	2022	2022	835	2.42156	341.298
452880	454649	+	589	rne	BCI_0440	CDS	1470	3437	1470	3437	0.427699	135.647
454097	455144	-	1047	predicted_RNA	pRNA11	RNA	23	38947	38947	23	1693.35	2021.79
455005	456099	+	364	pyrC	BCI_0441	CDS	591	239	591	239	2.4728	88.2459
456215	458071	+	618	sppA	BCI_0442	CDS	12404	411	12404	411	30.18	1090.89
458117	459187	+	356	gapA	BCI_0443	CDS	15485	75	15485	75	206.467	2364.12
459430	460125	+	231	minC	BCI_0444	CDS	18187	137	18187	137	132.752	4279.15
460142	460954	+	270	minD	BCI_0445	CDS	6548	34	6548	34	192.588	1318.11
460958	461239	+	93	minE	BCI_0446	CDS	2614	33	2614	33	79.2121	1527.67
461260	461958	-	232	BCI_0447	BCI_0447	CDS	1791	2088	2088	1791	1.16583	489.16
462025	462972	-	315	BCI_0448	BCI_0448	CDS	158	7673	7673	158	48.5633	1323.92
463060	463899	-	279	BCI_0449	BCI_0449	CDS	66	9850	9850	66	149.242	1918.85
463921	464721	-	266	BCI_0450	BCI_0450	CDS	136	11917	11917	136	87.625	2434.97
464758	465726	-	322	BCI_0451	BCI_0451	CDS	111	12139	12139	111	109.36	2048.97
466225	467559	+	444	terC	BCI_0452	CDS	3177	282	3177	282	11.266	388.904
467724	469082	-	452	pabB	BCI_0453	CDS	1345	1367	1367	1345	1.01636	164.376
469204	470178	+	324	BCI_0454	BCI_0454	CDS	1803	313	1803	313	5.76038	302.454
470183	470258	-	76	Ala_tRNA2	BCI_0455	RNA	27	107	107	27	3.96296	76.5206
470279	471679	-	466	gltX	BCI_0456	CDS	1242	4262	4262	1242	3.43156	497.091
471790	471862	+	73	Val_tRNA	BCI_0457	RNA	537	4	537	4	134.25	399.816
471901	471976	+	76	Lys_tRNA	BCI_0458	RNA	437	48	437	48	9.10417	312.519
472023	473540	-	505	emrB	BCI_0459	CDS	2893	6217	6217	2893	2.14898	669.11
473575	474786	-	403	emrA	BCI_0460	CDS	234	15993	15993	234	68.3462	2156.92
475083	475517	-	144	sufE	BCI_0461	CDS	56	1428	1428	56	25.5	538.982
475533	476756	-	407	sufS	BCI_0462	CDS	230	10784	10784	230	46.887	1440.1
476753	478051	-	432	sufD	BCI_0463	CDS	1032	5654	5654	1032	5.47868	711.345
478032	478772	-	246	sufC	BCI_0464	CDS	111	4669	4669	111	42.0631	1031.57
478847	480322	-	491	sufB	BCI_0465	CDS	220	13688	13688	220	62.2182	1515.19
480337	480696	-	119	sufA	BCI_0466	CDS	7	2926	2926	7	418	1336.4
480843	483227	-	794	pheT	BCI_0467	CDS	1738	5646	5646	1738	3.24856	386.481
483244	484227	-	327	pheS	BCI_0468	CDS	724	3607	3607	724	4.98204	599.524
484295	484657	-	120	rplT	BCI_0469	CDS	12	3447	3447	12	287.25	1561.24
484685	484882	-	65	rpmI	BCI_0470	CDS	3	2998	2998	3	999.333	2506.84
484928	485443	-	171	infC	BCI_0471	CDS	27	8430	8430	27	312.222	2679.41
485475	487403	-	642	thrS	BCI_0472	CDS	563	9731	9731	563	17.2842	823.817
487653	488375	-	240	dnaQ	BCI_0473	CDS	86	226	226	86	2.62791	51.1806
488425	488886	+	153	rnhA	BCI_0474	CDS	730	156	730	156	4.67949	259.322
488971	489744	+	257	gloB	BCI_0475	CDS	848	102	848	102	8.31373	179.337
489766	490602	-	278	hyp_24	BCI_0476	CDS	2423	185	185	2423	0.0763516	36.1689
490684	491706	-	340	mltC	BCI_0477	CDS	808	704	704	808	0.871287	112.539
491812	492045	-	77	hyp_25	BCI_0478	CDS	125	175	175	125	1.4	123.525
492130	493287	-	385	BCI_0479	BCI_0479	CDS	502	1053	1053	502	2.09761	148.654
493284	493691	-	408	gene	gene_2	CDS	87	839	839	87	9.64368	111.766
493691	494254	-	187	hyp_26	BCI_0481	CDS	86	3516	3516	86	40.8837	1021.92
494302	495255	-	317	gshB	BCI_0482	CDS	85	10120	10120	85	119.059	1735.12
495314	495937	-	207	sodA	BCI_0483	CDS	229	13967	13967	229	60.9913	3667.25
495970	496542	-	190	yhgI	BCI_0484	CDS	718	6218	6218	718	8.66017	1778.71
496690	497451	+	253	bioH	BCI_0485	CDS	1618	72	1618	72	22.4722	347.589
497561	497634	+	74	Ile_tRNA	BCI_0486	RNA	352	13	352	13	27.0769	258.535
497662	497734	+	73	Ala_tRNA	BCI_0487	RNA	561	7	561	7	80.1429	417.684
497784	498227	+	147	BCI_0488	BCI_0488	CDS	2110	152	2110	152	13.8816	780.142
498343	498714	+	123	dsrE	BCI_0489	CDS	784	150	784	150	5.22667	346.433
498726	499085	+	119	dsrF	BCI_0490	CDS	916	391	916	391	2.34271	418.366
499095	499382	+	95	dsrH	BCI_0491	CDS	578	79	578	79	7.31646	330.683
499440	499814	+	124	rpsL	BCI_0492	CDS	1279	55	1279	55	23.2545	560.605
499873	500343	+	156	rpsG	BCI_0493	CDS	2997	25	2997	25	119.88	1044.17
500448	502565	+	705	fusA	BCI_0494	CDS	13286	109	13286	109	121.89	1024.27
502681	503865	+	394	tuf	BCI_0495	CDS	19778	112	19778	112	176.589	2728.31
503931	504314	+	127	secE	BCI_0496	CDS	5039	50	5039	50	100.78	2156.5
504315	504860	+	181	nusG	BCI_0497	CDS	10966	28	10966	28	391.643	3292.9
504916	505344	+	142	rplK	BCI_0498	CDS	7681	53	7681	53	144.925	2939.93
505348	506052	+	234	rplA	BCI_0499	CDS	11928	255	11928	255	46.7765	2770.51
506232	506732	+	166	rplJ	BCI_0500	CDS	11206	81	11206	81	138.346	3669.03
506768	507133	+	121	rplL	BCI_0501	CDS	7609	16	7609	16	475.562	3417.83
507307	511329	+	1340	rpoB	BCI_0502	CDS	25970	210	25970	210	123.667	1053.36
511418	515644	+	1408	rpoC	BCI_0503	CDS	45572	189	45572	189	241.122	1759.15
515662	516690	+	342	murB	BCI_0504	CDS	6154	186	6154	186	33.086	978.002
516692	517540	+	282	birA	BCI_0505	CDS	1186	382	1186	382	3.10471	228.583
517580	517697	-	118	rrfA	BCI_0157	RNA	3	4	4	3	1.33333	1.84241
517730	520631	-	2902	rrlA	BCI_0156	RNA	1	3	3	1	3	0.0561865
520716	520788	-	73	Glu_tRNA2	BCI_0155	RNA	0	0	0	0	0	0
520902	522449	-	1548	rrsA	BCI_0154	RNA	0	0	0	0	0	0
522858	524270	-	470	lpdA	BCI_0510	CDS	109	4948	4948	109	45.3945	572.19
524329	525618	-	358	aceF	BCI_0511	CDS	258	1365	1365	258	5.2907	207.233
525629	528298	-	889	aceE	BCI_0512	CDS	293	4771	4771	293	16.2833	291.686
528653	529540	+	295	nadC	BCI_0513	CDS	1068	184	1068	184	5.80435	196.769
529591	530202	+	203	coaE	BCI_0514	CDS	346	5	346	5	69.2	92.6378
530326	532893	-	856	secA_degen	secA_degen	CDS	5	1096	1096	5	219.2	69.5897
533136	533657	+	173	hyp_27	BCI_0516	CDS	503	761	503	761	0.660972	158.027
533781	534953	-	390	ftsZ	BCI_0517	CDS	272	3918	3918	272	14.4044	546.019
535265	536737	-	490	murC	BCI_0518	CDS	211	4412	4412	211	20.91	489.382
536809	537885	-	358	murG	BCI_0519	CDS	36	10704	10704	36	297.333	1625.07
538203	539543	-	446	murD	BCI_0520	CDS	1148	12627	12627	1148	10.9991	1538.77
539545	540627	-	360	mraY	BCI_0521	CDS	482	10321	10321	482	21.4129	1558.22
540621	541982	-	453	murF	BCI_0522	CDS	771	4816	4816	771	6.24643	577.825
541985	543472	-	495	murE	BCI_0523	CDS	419	6603	6603	419	15.7589	725.011
543659	544612	-	317	mraW	BCI_0524	CDS	94	3273	3273	94	34.8191	561.171
544713	545579	-	288	queF	BCI_0525	CDS	1262	2037	2037	1262	1.6141	384.421
545764	546558	-	264	map	BCI_0526	CDS	83	2300	2300	83	27.7108	473.513
546863	547561	+	232	rpsB	BCI_0527	CDS	4800	80	4800	80	60	1124.51
547604	548446	+	280	tsf	BCI_0528	CDS	5468	79	5468	79	69.2152	1061.4
548506	549255	+	249	pyrH	BCI_0529	CDS	4892	42	4892	42	116.476	1067.81
549304	549861	+	185	frr	BCI_0530	CDS	3904	281	3904	281	13.8932	1146.95
550015	551211	+	398	dxr	BCI_0531	CDS	2720	430	2720	430	6.32558	371.445
550898	551238	-	340	predicted_RNA	pRNA12	RNA	14	322	322	14	23	51.4737
551341	552102	+	253	uppS	BCI_0532	CDS	1244	42	1244	42	29.619	267.244
552112	552966	+	284	cdsA	BCI_0533	CDS	1695	278	1695	278	6.09712	324.384
552986	554365	+	459	cdsA	BCI_0534	CDS	4932	394	4932	394	12.5178	584.008
554370	556751	+	793	ecfE	BCI_0535	CDS	4255	2417	4255	2417	1.76045	291.632
556830	557327	+	165	ompH	BCI_0536	CDS	10625	26	10625	26	408.654	3499.88
557583	558032	+	149	fabZ	BCI_0537	CDS	1864	85	1864	85	21.9294	679.936
558257	561748	+	1163	dnaE	BCI_0538	CDS	13464	639	13464	639	21.0704	629.22
561765	562724	+	319	accA	BCI_0539	CDS	3970	92	3970	92	43.1522	676.407
562746	563936	-	396	metC	BCI_0540	CDS	88	24539	24539	88	278.852	3367.98
564244	564918	+	224	mutH	BCI_0541	CDS	1915	329	1915	329	5.82067	464.653
564708	564858	-	150	predicted_RNA	pRNA13	RNA	0	325	325	0	325	117.761
565076	565555	+	159	nudH	BCI_0542	CDS	1396	132	1396	132	10.5758	477.196
565763	566620	+	285	lgt	BCI_0543	CDS	1606	41	1606	41	39.1707	306.273
566651	567445	+	264	thyA	BCI_0544	CDS	3619	1150	3619	1150	3.14696	745.063
567517	570813	+	1098	recC	BCI_0545	CDS	5826	1539	5826	1539	3.78558	288.387
570857	574408	+	1183	recB	BCI_0546	CDS	5410	5437	5410	5437	0.995034	248.554
573560	574082	-	522	predicted_RNA	pRNA14	RNA	0	756	756	0	756	78.7154
574133	574356	-	223	predicted_RNA	pRNA15	RNA	229	1413	1413	229	6.17031	344.386
574456	576315	+	619	recD	BCI_0547	CDS	606	1225	606	1225	0.494694	53.2096
574699	574964	-	265	predicted_RNA	pRNA16	RNA	0	1248	1248	0	1248	255.963
576514	577146	+	210	crp	BCI_0548	CDS	3226	48	3226	48	67.2083	834.936
577230	577820	-	196	pabA	BCI_0549	CDS	302	559	559	302	1.85099	155.012
577980	579392	+	470	dnaB	BCI_0550	CDS	2436	344	2436	344	7.0814	281.701
579471	579543	+	73	Arg_tRNA	BCI_0551	RNA	45	79	45	79	0.56962	33.5041
579809	581704	+	631	dnaK	BCI_0552	CDS	14978	75	14978	75	199.707	1290.13
581803	582921	+	372	dnaJ	BCI_0553	CDS	4949	503	4949	503	9.83897	723.074
582954	583217	-	87	rpsT	BCI_0554	CDS	756	3262	3262	756	4.31481	2037.85
583427	584410	+	327	ribF	BCI_0555	CDS	4151	162	4151	162	25.6235	689.943
584422	587238	+	938	ileS	BCI_0556	CDS	17675	656	17675	656	26.9436	1024.15
587238	587741	+	167	lspA	BCI_0557	CDS	4884	104	4884	104	46.9615	1589.53
587770	588711	+	313	ispH	BCI_0558	CDS	16543	49	16543	49	337.612	2872.62
588861	590006	+	381	carA	BCI_0559	CDS	5966	243	5966	243	24.5514	851.072
590025	593264	+	1079	carB	BCI_0560	CDS	16133	569	16133	569	28.3533	812.647
593307	593804	+	165	folA	BCI_0561	CDS	349	965	349	965	0.361658	114.961
593806	594672	-	288	apaH	BCI_0562	CDS	100	3987	3987	100	39.87	752.423
594902	595717	-	271	ksgA	BCI_0563	CDS	2266	526	526	2266	0.232127	105.493
595710	596714	-	334	pdxA	BCI_0564	CDS	136	3425	3425	136	25.1838	557.343
596701	598002	-	433	surA	BCI_0565	CDS	169	4052	4052	169	23.9763	508.616
598051	598383	+	110	smpA	BCI_0566	CDS	477	419	477	419	1.13842	235.686
598411	598740	-	109	hyp_28	BCI_0567	CDS	931	1404	1404	931	1.50806	700.082
598916	599401	+	161	smpB	BCI_0568	CDS	10459	15	10459	15	697.267	3530.8
599480	599854	+	375	sRNA	BCI_0569	RNA	736482	556	736482	556	1324.61	106743
599882	600625	-	247	cysQ	BCI_0570	CDS	1841	4905	4905	1841	2.66431	1079.32
600646	601098	-	150	rplI	BCI_0571	CDS	27	4378	4378	27	162.148	1586.33
601184	601411	-	75	rpsR	BCI_0572	CDS	10	1685	1685	10	168.5	1221.09
601415	601768	-	117	priN	BCI_0573	CDS	15	2215	2215	15	147.667	1028.95
601772	602149	-	125	rpsF	BCI_0574	CDS	34	2045	2045	34	60.1471	889.184
602303	603049	-	248	BCI_0575	BCI_0575	CDS	72	1690	1690	72	23.4722	370.376
603138	605387	-	749	rnr	BCI_0576	CDS	144	4890	4890	144	33.9583	354.842
605490	606788	-	432	purA	BCI_0577	CDS	167	6706	6706	167	40.1557	843.7
606892	607893	-	333	hflC	BCI_0578	CDS	36	6490	6490	36	180.278	1059.28
607900	609060	-	386	hflK	BCI_0579	CDS	47	5531	5531	47	117.681	778.798
609103	610386	-	427	hflX	BCI_0580	CDS	70	4964	4964	70	70.9143	631.847
610494	610754	-	86	hfq	BCI_0581	CDS	33	833	833	33	25.2424	526.447
610770	611036	+	88	hyp_29	BCI_0582	CDS	9	774	9	774	0.0116279	5.55863
611067	611996	-	309	miaA	BCI_0583	CDS	55	782	782	55	14.2182	137.549
612006	613814	-	602	mutL	BCI_0584	CDS	833	3967	3967	833	4.7623	358.157
613891	615108	-	382	BCI_0585	BCI_0585	CDS	643	3125	3125	643	4.86003	444.626
615477	616031	-	184	orn	BCI_0586	CDS	321	17819	17819	321	55.5109	5263.49
616407	617285	+	292	psd	BCI_0587	CDS	1383	1192	1383	1192	1.16023	257.423
617561	618544	-	327	genX	BCI_0588	CDS	472	5698	5698	472	12.072	947.072
618632	619201	-	189	efp	BCI_0589	CDS	110	2421	2421	110	22.0091	696.212
619235	620254	+	339	yodO	BCI_0590	CDS	1227	2399	1227	2399	0.511463	196.722
620344	621984	-	546	groEL	BCI_0591	CDS	151	147189	147189	151	974.762	14651.8
622026	622319	-	97	groES	BCI_0592	CDS	20	19573	19573	20	978.65	10967.2
622572	623990	+	472	aspA	BCI_0593	CDS	19749	105	19749	105	188.086	2274.11
624068	624140	+	73	Phe_tRNA	BCI_0594	RNA	252	4	252	4	63	187.623
624393	624995	-	200	BCI_0595	BCI_0595	CDS	109	15697	15697	109	144.009	4265.75
625182	626243	+	353	queA	BCI_0596	CDS	6183	2650	6183	2650	2.33321	951.991
626305	627417	+	370	tgt	BCI_0597	CDS	4886	281	4886	281	17.3879	717.728
627439	627771	+	110	yajC	BCI_0598	CDS	1808	39	1808	39	46.359	893.334
627805	629643	+	612	secD	BCI_0599	CDS	12161	488	12161	488	24.9201	1080.01
629654	630574	+	306	secF	BCI_0600	CDS	5051	262	5051	262	19.2786	897.148
630832	631986	+	378	ribD	BCI_0601	CDS	8482	1428	8482	1428	5.93978	1219.59
632056	632574	+	172	ribH	BCI_0602	CDS	2466	28	2466	28	88.0714	779.243
632601	633020	+	139	nusB	BCI_0603	CDS	2652	33	2652	33	80.3636	1036.97
633102	634079	+	325	thiL	BCI_0604	CDS	3848	183	3848	183	21.0273	643.517
634087	634593	+	168	pgpA	BCI_0605	CDS	3487	93	3487	93	37.4946	1128.11
634648	636423	+	591	OMP85_b	BCI_0606	CDS	11814	685	11814	685	17.2467	1086.47
636420	639368	+	982	hyp_30	BCI_0607	CDS	11998	1246	11998	1246	9.62921	664.057
639384	639917	-	177	ppa	BCI_0608	CDS	456	1301	1301	456	2.85307	399.496
640077	641750	-	557	proS	BCI_0609	CDS	145	7754	7754	145	53.4759	756.622
641839	641924	-	86	Leu_tRNA	BCI_0610	RNA	2	365	365	2	182.5	230.676
642053	642958	-	301	nadK	BCI_0611	CDS	159	620	620	159	3.89937	111.952
643042	643638	+	198	grpE	BCI_0612	CDS	5079	57	5079	57	89.1053	1394.19
643689	644357	-	222	ung	BCI_0613	CDS	262	1140	1140	262	4.35115	279.1
644411	646060	-	549	nadB	BCI_0614	CDS	2074	914	914	2074	0.440694	90.4862
644625	645026	+	401	predicted_RNA	pRNA17	RNA	2415	149	2415	149	16.2081	327.326
646228	646303	-	76	Met_tRNA1	BCI_0615	RNA	6	159	159	6	26.5	113.708
646370	648208	-	612	rpoD	BCI_0616	CDS	431	23169	23169	431	53.7564	2057.62
648290	650077	-	595	dnaG	BCI_0617	CDS	368	6357	6357	368	17.2745	580.689
650171	650440	-	71	rpsU	BCI_0618	CDS	185	1622	1622	185	8.76757	1241.65
650587	651612	+	341	gcp	BCI_0619	CDS	6354	31	6354	31	204.968	1012.75
651654	652019	+	121	folB	BCI_0620	CDS	1402	17	1402	17	82.4706	629.754
652158	652985	+	275	BCI_0621	BCI_0621	CDS	3359	535	3359	535	6.2785	663.874
653051	654289	-	412	cca	BCI_0622	CDS	3022	15685	15685	3022	5.19027	2069.17
655168	655803	+	211	ribB	BCI_0623	CDS	936	166	936	166	5.63855	241.102
655968	656717	-	249	plsC	BCI_0624	CDS	410	1645	1645	410	4.0122	359.066
656963	657370	-	135	holD	BCI_0625	CDS	1360	48	48	1360	0.0352941	19.3248
657007	657212	+	205	predicted_RNA	pRNA18	RNA	619	50	619	50	12.38	164.114
657363	659153	-	591	deaD	BCI_0626	CDS	289	6306	6306	289	21.8201	579.929
659552	661645	-	697	pnp	BCI_0627	CDS	492	26006	26006	492	52.8577	2027.91
661756	662061	-	101	rpsO	BCI_0628	CDS	20	9683	9683	20	484.15	5210.71
662146	663099	-	317	truB	BCI_0629	CDS	162	2496	2496	162	15.4074	427.951
663102	663506	-	134	rbfA	BCI_0630	CDS	188	1325	1325	188	7.04787	537.427
663575	666217	-	880	infB	BCI_0631	CDS	560	15546	15546	560	27.7607	960.161
666244	667731	-	495	nusA	BCI_0632	CDS	65	7143	7143	65	109.892	784.303
667937	668013	-	77	Met_tRNA2	BCI_0633	RNA	8	1200	1200	8	150	847.03
668074	668164	-	91	Leu_tRNA4	BCI_0634	RNA	6	1713	1713	6	285.5	1023.11
668231	668509	-	92	secG	BCI_0635	CDS	70	6264	6264	70	89.4857	3700.6
668611	669948	-	445	glmM	BCI_0636	CDS	41	4915	4915	41	119.878	600.305
669945	670811	-	288	folP	BCI_0637	CDS	281	4889	4889	281	17.3986	922.648
670920	672803	-	627	ftsH	BCI_0638	CDS	295	12400	12400	295	42.0339	1074.89
672862	673491	-	209	rrmJ	BCI_0639	CDS	88	5241	5241	88	59.5568	1362.94
673768	674244	-	158	greA	BCI_0640	CDS	59	5597	5597	59	94.8644	1925.34
674447	675874	+	475	dacB	BCI_0641	CDS	3203	3646	3203	3646	0.878497	366.498
675884	676894	-	336	obgE	BCI_0642	CDS	158	10106	10106	158	63.962	1634.74
676946	677200	-	84	rpmA	BCI_0643	CDS	31	4202	4202	31	135.548	2718.85
677215	677526	-	103	rplU	BCI_0644	CDS	29	5891	5891	29	203.138	3108.57
677988	679151	+	387	pgk	BCI_0645	CDS	2935	770	2935	770	3.81169	412.198
679230	680306	+	358	fbaA	BCI_0646	CDS	2763	187	2763	187	14.7754	419.475
680448	681119	+	223	rpiA	BCI_0647	CDS	2767	389	2767	389	7.11311	674.392
681172	681780	-	202	BCI_0648	BCI_0648	CDS	275	1217	1217	275	4.42545	327.452
681939	682742	-	267	thiD	BCI_0649	CDS	192	8548	8548	192	44.5208	1740.05
682912	684492	-	526	guaA	BCI_0650	CDS	668	15239	15239	668	22.8129	1574.63
684542	685999	-	485	guaB	BCI_0651	CDS	63	21280	21280	63	337.778	2384.72

## Sheet: Baum_red_rep2
start	end	strand	length	gene	synonym	type	reads_fwd	reads_rev	sense_counts	anti_counts	diff_mag	tpm
197	1720	+	507	mqo	BCI_0001	CDS	59080	7229	59080	7229	8.17264	1074.91
1921	2159	-	238	predicted_RNA	pRNA1	RNA	169	17874	17874	169	105.763	692.764
1933	5826	+	1297	purL	BCI_0002	CDS	103139	2594	103139	2594	39.7606	733.539
5880	6356	+	158	BCI_0003	BCI_0003	CDS	3341	3731	3341	3731	0.89547	195.056
6569	7822	+	417	glyA	BCI_0004	CDS	115013	3181	115013	3181	36.1562	2544.2
7855	8661	-	268	suhB	BCI_0005	CDS	4110	29779	29779	4110	7.2455	1024.98
8964	10118	+	384	iscS	BCI_0006	CDS	28944	1784	28944	1784	16.2242	695.293
10151	10585	+	144	ndk	BCI_0007	CDS	14251	536	14251	536	26.5877	912.9
10933	12054	+	373	ispG	BCI_0008	CDS	393810	1072	393810	1072	367.36	9739.08
12077	13369	+	430	hisS	BCI_0009	CDS	61876	5884	61876	5884	10.516	1327.38
13440	14615	+	391	yfgl	BCI_0010	CDS	25085	7790	25085	7790	3.22015	591.804
14634	16052	+	472	engA	BCI_0011	CDS	40290	9089	40290	9089	4.43283	787.4
16150	17811	+	553	pgi	BCI_0012	CDS	64867	4187	64867	4187	15.4925	1082.03
18124	19740	-	538	pckA	BCI_0013	CDS	5142	40359	40359	5142	7.84889	691.988
20049	20594	+	181	nudE	BCI_0014	CDS	9435	1142	9435	1142	8.26182	480.843
20778	21935	+	385	metK	BCI_0015	CDS	44454	1035	44454	1035	42.9507	1065.1
21979	22887	-	302	metR	BCI_0016	CDS	5591	7756	7756	5591	1.38723	236.903
22990	25284	+	764	metE	BCI_0017	CDS	656340	2654	656340	2654	247.302	7924.57
25374	25569	-	195	predicted_RNA	pRNA2	RNA	705	12083	12083	705	17.139	571.584
25559	27043	+	494	rmuc	BCI_0018	CDS	31452	4136	31452	4136	7.60445	587.302
27142	28062	-	306	metA	BCI_0019	CDS	5270	7018	7018	5270	1.33169	211.559
28316	30781	-	821	plsB	BCI_0020	CDS	14728	33203	33203	14728	2.25441	373.056
30959	31975	-	338	trpS	BCI_0021	CDS	7820	56302	56302	7820	7.19974	1536.55
32055	32750	-	231	rpe	BCI_0022	CDS	4004	40242	40242	4004	10.0504	1606.97
32844	33923	-	359	aroB	BCI_0023	CDS	1685	29354	29354	1685	17.4208	754.246
33928	34449	-	173	aroK	BCI_0024	CDS	274	17258	17258	274	62.9854	920.205
34736	36097	-	453	pssA	BCI_0025	CDS	5239	19318	19318	5239	3.68734	393.373
36278	36928	-	216	dedA	BCI_0026	CDS	20877	19897	19897	20877	0.953058	849.717
37462	37825	-	363	Rnase P	pRNA3	RNA	976	1552340	1552340	976	1590.51	39447.6
38198	38455	+	85	bolA	BCI_0027	CDS	13111	393	13111	393	33.3613	1422.84
38523	39779	+	418	murA	BCI_0028	CDS	59135	2445	59135	2445	24.1861	1304.99
39828	41210	-	460	degQ	BCI_0029	CDS	5553	18402	18402	5553	3.31388	369.018
41305	41712	-	135	hyp_1	BCI_0030	CDS	903	5566	5566	903	6.1639	380.32
41948	42376	+	142	rplM	BCI_0031	CDS	62603	355	62603	355	176.346	4066.75
42396	42794	+	132	rpsI	BCI_0032	CDS	72163	335	72163	335	215.412	5042.91
43254	43748	+	164	hyp_2	BCI_0033	CDS	2151	261	2151	261	8.24138	120.986
44259	45017	+	253	hyp_3	gene	CDS	73020	1155	73020	1155	63.2208	2662.33
45160	46740	+	526	purH	BCI_0035	CDS	116645	2923	116645	2923	39.9059	2045.6
46761	48035	+	424	purD	BCI_0036	CDS	123160	5981	123160	5981	20.5919	2679.44
48145	48624	-	159	hsp	BCI_0037	CDS	989	198290	198290	989	200.495	11503.9
48741	49643	-	300	hyp_4	BCI_0038	CDS	1566	186667	186667	1566	119.2	5739.66
49666	50199	-	177	nuc	BCI_0039	CDS	1168	47008	47008	1168	40.2466	2449.85
50301	50585	-	94	hup	BCI_0040	CDS	285	13961	13961	285	48.986	1370.03
51328	53226	+	633	thiC	BCI_0041	CDS	316954	1087	316954	1087	291.586	4618.84
53213	53857	+	214	thiE	BCI_0042	CDS	76736	2065	76736	2065	37.1603	3307.7
53850	54623	+	257	thiF	BCI_0043	CDS	89054	1368	89054	1368	65.098	3196.4
54623	54823	+	66	thiS	BCI_0044	CDS	24867	79	24867	79	314.772	3475.52
54827	55606	+	259	thiG	BCI_0045	CDS	118183	571	118183	571	206.975	4209.16
55603	56751	+	382	thiH	BCI_0046	CDS	51893	16873	51893	16873	3.07551	1253.1
56812	57288	-	158	mreD	BCI_0047	CDS	1112	11288	11288	1112	10.1511	659.022
57447	58313	-	288	mreC	BCI_0048	CDS	735	68000	68000	735	92.517	2177.99
58348	59391	-	347	mreB	BCI_0049	CDS	387	36933	36933	387	95.4341	981.805
59747	60250	+	167	aroQ	BCI_0050	CDS	8813	594	8813	594	14.8367	486.797
60272	60724	+	150	accB	BCI_0051	CDS	10216	96	10216	96	106.417	628.246
60733	62082	+	449	accC	BCI_0052	CDS	31607	1395	31607	1395	22.6573	649.347
62339	62974	-	211	marC	BCI_0053	CDS	7654	7274	7274	7654	0.950353	318.003
63371	65458	+	695	prlC	BCI_0054	CDS	21774	6834	21774	6834	3.18613	288.997
65455	67029	-	524	pitA	BCI_0055	CDS	2363	10264	10264	2363	4.34363	180.686
67592	68656	+	354	ftsY	BCI_0056	CDS	21938	875	21938	875	25.072	571.655
68669	69310	+	213	ftsE	BCI_0057	CDS	23034	866	23034	866	26.5982	997.539
69330	70280	+	316	ftsX	BCI_0058	CDS	51638	2123	51638	2123	24.3231	1507.38
70343	71203	+	286	rpoH	BCI_0059	CDS	42691	384	42691	384	111.174	1376.93
71376	72095	+	239	fre	BCI_0060	CDS	27245	1162	27245	1162	23.4466	1051.55
72230	73165	+	311	hemC	BCI_0061	CDS	31519	654	31519	654	48.1942	934.872
73173	73913	+	246	hemD	BCI_0062	CDS	18890	1670	18890	1670	11.3114	708.332
73928	75448	-	506	lnt	BCI_0063	CDS	17004	12973	12973	17004	0.762938	236.499
75494	75961	-	155	hyp_5	BCI_0064	CDS	361	10605	10605	361	29.3767	631.131
76001	77356	-	451	miaB	BCI_0065	CDS	363	50232	50232	363	138.38	1027.41
77544	79559	-	671	ligA	BCI_0066	CDS	1717	28936	28936	1717	16.8526	397.792
79623	80432	-	269	zipA	BCI_0067	CDS	1116	6734	6734	1116	6.03405	230.92
80668	81633	+	321	cysK	BCI_0068	CDS	111859	278	111859	278	402.371	3214.45
81807	82064	+	85	ptsH	BCI_0069	CDS	9127	126	9127	126	72.4365	990.488
82117	83832	+	571	ptsI	BCI_0070	CDS	40418	4568	40418	4568	8.84807	652.949
84144	84857	-	237	purC	BCI_0071	CDS	985	7872	7872	985	7.99188	306.392
85387	86463	+	358	purM	BCI_0072	CDS	33753	1005	33753	1005	33.5851	869.7
86454	87113	+	219	purN	BCI_0073	CDS	14510	4452	14510	4452	3.25921	611.172
87324	89411	+	695	ppk	BCI_0074	CDS	16599	18265	16599	18265	0.908787	220.312
89439	91436	-	665	tktA	BCI_0075	CDS	1525	119898	119898	1525	78.6216	1663.15
91457	92410	-	317	talB	BCI_0076	CDS	2672	68352	68352	2672	25.5808	1988.99
92901	93731	+	276	cysT	BCI_0077	CDS	25469	753	25469	753	33.8234	851.222
93740	94582	+	280	cysW	BCI_0078	CDS	19702	2277	19702	2277	8.65261	649.071
94585	95718	+	377	cysA	BCI_0079	CDS	29461	3157	29461	3157	9.33196	720.852
95991	96179	+	62	rnfB	BCI_0080	CDS	1789	2196	1789	2196	0.814663	266.17
96281	97555	-	424	tyrS	BCI_0081	CDS	5944	30907	30907	5944	5.1997	672.405
97591	98241	-	216	pdxH	BCI_0082	CDS	270	41369	41369	270	153.219	1766.69
98475	98909	-	144	slyA	BCI_0083	CDS	289	64684	64684	289	223.82	4143.57
99001	99099	-	32	hyp_6	BCI_0084	CDS	70	1630	1630	70	23.2857	469.87
99313	99969	+	218	rnt	BCI_0085	CDS	31934	14624	31934	14624	2.18367	1351.25
100009	100368	-	119	BCI_0086	BCI_0086	CDS	2909	11223	11223	2909	3.85803	869.966
100574	101197	-	207	ribE	BCI_0087	CDS	504	11832	11832	504	23.4762	527.264
101349	101425	+	77	Val_tRNA2	BCI_0088	RNA	5131	20	5131	20	256.55	614.683
101593	101937	+	114	momp	BCI_0089	CDS	152269	6971	152269	6971	21.8432	12321
102094	102165	-	72	Gln_tRNA	BCI_0090	RNA	17	7361	7361	17	433	943.071
102178	102254	-	77	Met_tRNA	BCI_0091	RNA	6	11977	11977	6	1996.17	1434.82
102263	102336	-	74	Gln_tRNA_2	BCI_0092	RNA	3	8891	8891	3	2963.67	1108.3
102388	102473	-	86	Leu_tRNA1	BCI_0093	RNA	13	3929	3929	13	302.231	421.428
102617	104287	+	556	glnS	BCI_0094	CDS	58351	2776	58351	2776	21.0198	968.086
104379	104909	-	176	fldA	BCI_0095	CDS	1155	17071	17071	1155	14.7801	894.719
105072	105818	+	248	hyp_7	BCI_0096	CDS	8548	1621	8548	1621	5.27329	317.946
106173	107354	+	393	sucC	BCI_0097	CDS	95002	2085	95002	2085	45.5645	2229.87
107342	108226	+	294	sucD	BCI_0098	CDS	56039	571	56039	571	98.1419	1758.26
108228	109292	+	355	nc_21	nc_21	RNA	33603	7182	33603	7182	4.67878	873.152
109297	110598	+	434	tolB_gene	tolB_gene	CDS	657	9709	9709	657	14.7778	206.36
109385	109607	-	222	predicted_RNA	pRNA4	RNA	2322	8071	8071	2322	3.47588	335.363
110638	111273	+	211	pal	BCI_0100	CDS	27716	266	27716	266	104.195	1211.68
111288	111935	+	215	hyp_8a	BCI_0101	CDS	40869	704	40869	704	58.0526	1753.46
111993	113039	+	348	nadA	BCI_0102	CDS	95707	6432	95707	6432	14.8798	2536.91
112996	114456	-	486	tilS	BCI_0103	CDS	8293	73687	73687	8293	8.88545	1398.6
114465	116123	-	552	antiporter	BCI_0104	CDS	2332	97796	97796	2332	41.9365	1634.26
116503	117357	-	284	ABC_trans	BCI_0105	CDS	1306	60915	60915	1306	46.6424	1978.55
117359	118201	-	280	troB	BCI_0106	CDS	1255	183003	183003	1255	145.819	6028.93
118286	118783	-	165	ssb	BCI_0107	CDS	734	59243	59243	734	80.7125	3312.02
119426	120775	+	450	gltP_degen	gltP_degen	CDS	26444	3749	26444	3749	7.05361	542.069
121415	121840	+	141	BCI_0109	BCI_0109	CDS	15886	377	15886	377	42.1379	1039.29
122087	122701	+	204	gmk	BCI_0110	CDS	42875	1315	42875	1315	32.6046	1938.72
122774	122971	+	65	rpoZ	BCI_0111	CDS	7553	435	7553	435	17.3632	1071.88
123268	125367	+	699	recG	BCI_0112	CDS	55118	6183	55118	6183	8.91444	727.372
125425	126033	+	202	GTP-binding	BCI_0113	CDS	9456	4070	9456	4070	2.32334	431.814
126348	127268	-	306	polA	BCI_0114	CDS	3189	18230	18230	3189	5.71653	549.548
127464	128618	+	384	dnaX	BCI_0115	CDS	30252	4010	30252	4010	7.54414	726.713
128893	129231	+	112	hyp_8	BCI_0116	CDS	10709	979	10709	979	10.9387	882.005
129409	131304	+	631	htpG	BCI_0117	CDS	42773	2477	42773	2477	17.2681	625.289
131401	132042	+	213	adk	BCI_0118	CDS	21854	6906	21854	6906	3.16449	946.437
132045	133118	-	357	purK	BCI_0119	CDS	6122	45429	45429	6122	7.42061	1173.83
133115	133624	-	169	purE	BCI_0120	CDS	130	28253	28253	130	217.331	1542.12
134028	135416	+	462	cysS	BCI_0121	CDS	22677	2360	22677	2360	9.6089	452.776
135430	136287	-	285	folD	BCI_0122	CDS	602	37126	37126	602	61.6711	1201.64
136485	136562	+	78	Arg_tRNA1	BCI_0123	RNA	1551	162	1551	162	9.57407	183.425
136685	137890	-	402	cyaA_degen	cyaA_degen	CDS	33008	1826	33008	1826	18.0767	757.414
137966	138790	+	274	dapF	BCI_0125	CDS	21677	5460	21677	5460	3.97015	729.775
138903	139619	+	238	BCI_0126	BCI_0126	CDS	16158	9951	16158	9951	1.62376	626.255
139475	139527	-	52	predicted_RNA	pRNA5	RNA	0	723	723	0	723	128.255
139674	141614	+	646	uvrD	BCI_0127	CDS	54820	11722	54820	11722	4.67668	782.793
142061	143011	+	316	corA	BCI_0128	CDS	50881	7389	50881	7389	6.88605	1485.28
143038	143133	-	31	hyp_9	BCI_0129	CDS	1384	1586	1586	1384	1.14595	471.934
143136	144143	+	335	hyp_10	BCI_0130	CDS	13374	22401	13374	22401	0.597027	368.262
144158	146566	-	802	gyrB	BCI_0131	CDS	1634	113996	113996	1634	69.765	1311.16
146724	147836	-	370	dnaN	BCI_0132	CDS	1345	53746	53746	1345	39.9599	1339.94
148605	148748	+	47	rpmH	BCI_0133	CDS	4507	480	4507	480	9.38958	884.565
148760	149107	+	115	rnpA	BCI_0134	CDS	9313	2889	9313	2889	3.22361	747.02
149083	149340	+	85	hyp_11	BCI_0135	CDS	7643	6380	7643	6380	1.19796	829.44
149236	149695	-	459	predicted_RNA	pRNA6	RNA	1863	9492	9492	1863	5.09501	190.759
149343	150944	+	533	yidC	BCI_0136	CDS	34389	27291	34389	27291	1.26009	595.158
150941	152314	+	457	trmE	BCI_0137	CDS	23777	20618	23777	20618	1.15322	479.934
152320	154158	-	612	glmS	BCI_0138	CDS	3304	73761	73761	3304	22.3248	1111.77
154201	155610	-	469	glmU	BCI_0139	CDS	1771	52101	52101	1771	29.419	1024.74
155664	156086	-	140	atpC	BCI_0140	CDS	114	14187	14187	114	124.447	934.766
156100	157473	-	457	atpD	BCI_0141	CDS	415	74549	74549	415	179.636	1504.76
157519	158382	-	287	atpG	BCI_0142	CDS	285	39257	39257	285	137.744	1261.76
158429	159970	-	513	atpA	BCI_0143	CDS	1675	110131	110131	1675	65.7499	1980.31
159992	160525	-	177	atpH	BCI_0144	CDS	510	27933	27933	510	54.7706	1455.74
160548	161018	-	156	atpF	BCI_0145	CDS	228	25621	25621	228	112.373	1515
161047	161289	-	80	atpE	BCI_0146	CDS	102	10658	10658	102	104.49	1228.93
161326	162147	-	273	atpB	BCI_0147	CDS	735	14312	14312	735	19.4721	483.591
162235	164130	-	631	gidA	BCI_0148	CDS	12898	16471	16471	12898	1.27702	240.786
164177	165154	-	325	gcvT	BCI_0149	CDS	968	7916	7916	968	8.17769	224.679
165307	167034	+	575	recJ	BCI_0150	CDS	33914	705	33914	705	48.105	544.066
167153	168076	+	308	prfB_degen	prfB_degen	CDS	12018	1203	12018	1203	9.99002	359.933
168085	169605	+	506	lysS	BCI_0152	CDS	25748	2812	25748	2812	9.15647	469.389
169659	170483	+	274	murI	BCI_0153	CDS	2063	4518	2063	4518	0.456618	69.4527
170754	172301	+	1548	rrsB	BCI_0509	CDS	0	0	0	0	0	0
172415	172487	+	73	Glu_tRNA	BCI_0508	RNA	0	0	0	0	0	0
172572	175473	+	2902	rrlB	BCI_0507	CDS	0	0	0	0	0	0
175506	175623	+	118	rrfB	BCI_0506	CDS	0	0	0	0	0	0
175644	175720	+	77	Asp_tRNA	BCI_0158	RNA	59	0	59	0	59	7.06808
175744	175820	+	77	Trp_tRNA	BCI_0159	RNA	224	6	224	6	37.3333	26.8347
175857	177956	-	699	glyS	BCI_0160	CDS	9725	37865	37865	9725	3.89357	499.69
177962	178870	-	302	glyQ	BCI_0161	CDS	642	33465	33465	642	52.1262	1022.17
179601	180509	-	302	metF	BCI_0162	CDS	1662	45648	45648	1662	27.4657	1394.3
180690	181853	-	387	metB	BCI_0163	CDS	233	35425	35425	233	152.039	844.382
181866	182486	+	207	metJ_degen	metJ_degen	CDS	2406	7109	2406	7109	0.338444	107.217
182488	182766	-	92	rpmE	BCI_0165	CDS	322	14494	14494	322	45.0124	1453.25
182886	185000	+	704	priA	BCI_0166	CDS	23458	13522	23458	13522	1.7348	307.368
184682	184883	-	201	predicted_RNA	pRNA7	RNA	0	8926	8926	0	8926	409.639
185225	185767	+	180	hslV	BCI_0167	CDS	77693	117	77693	117	664.043	3981.53
185771	187111	+	446	hslU	BCI_0168	CDS	93512	243	93512	243	384.823	1934.07
187374	188144	+	256	tpiA	BCI_0169	CDS	22106	2470	22106	2470	8.9498	796.545
188146	189135	-	329	BCI_0170	BCI_0170	CDS	3904	25280	25280	3904	6.47541	708.796
189206	190168	-	320	pfkA	BCI_0171	CDS	469	47080	47080	469	100.384	1357.15
190415	191230	-	271	cysE	BCI_0172	CDS	388	32186	32186	388	82.9536	1095.56
191281	192303	-	340	gpsA	BCI_0173	CDS	564	43029	43029	564	76.2926	1167.41
192689	193120	-	143	BCI_0174	BCI_0174	CDS	255	13380	13380	255	52.4706	863.098
193227	194444	+	405	M23	BCI_0175	CDS	19617	4470	19617	4470	4.38859	446.805
194716	195207	+	163	coaD	BCI_0176	CDS	3601	3202	3601	3202	1.12461	203.787
195204	196013	-	269	mutM	BCI_0177	CDS	626	60830	60830	626	97.1725	2085.96
196074	196241	-	55	rpmG	BCI_0178	CDS	24	15496	15496	24	645.667	2598.95
196291	196518	-	75	rpmB	BCI_0179	CDS	40	14179	14179	40	354.475	1743.91
196617	197483	-	288	hyp_12	BCI_0180	CDS	2437	30940	30940	2437	12.6959	990.987
197581	198222	+	213	pyrE	BCI_0181	CDS	4174	5104	4174	5104	0.81779	180.764
198277	198729	-	150	dut	BCI_0182	CDS	431	22820	22820	431	52.9466	1403.35
198710	199924	-	404	dfp	BCI_0183	CDS	3038	23443	23443	3038	7.71659	535.269
200132	200208	-	77	Pro_tRNA1	BCI_0184	RNA	2	1657	1657	2	828.5	198.505
200299	200387	-	89	Leu_tRNA2	BCI_0185	RNA	1	6843	6843	1	6843	709.246
200410	200485	-	76	His_tRNA	BCI_0186	RNA	3	7216	7216	3	2405.33	875.837
200503	200580	-	78	Arg_tRNA2	BCI_0187	RNA	5	9757	9757	5	1951.4	1153.88
200830	202089	-	419	rho	BCI_0188	CDS	307	143843	143843	307	468.544	3166.76
202183	202509	-	108	trxA	BCI_0189	CDS	1451	37234	37234	1451	25.6609	3180.21
202633	202971	-	112	hyp_13	BCI_0190	CDS	4986	9331	9331	4986	1.87144	768.512
203304	204299	+	331	aroH	BCI_0191	CDS	12343	1803	12343	1803	6.84581	343.98
204398	205093	-	231	hyp_14	BCI_0192	CDS	2559	3887	3887	2559	1.51895	155.218
205192	206151	+	319	rluD	BCI_0193	CDS	13943	1318	13943	1318	10.5789	403.186
206158	208878	+	862	clpB	BCI_0194	CDS	105127	4607	105127	4607	22.819	1124.99
208875	209222	-	115	rplS	BCI_0195	CDS	2052	9575	9575	2052	4.66618	768.035
209239	209997	-	252	trmD	BCI_0196	CDS	550	83505	83505	550	151.827	3056.7
210022	210549	-	175	rimM	BCI_0197	CDS	78	51434	51434	78	659.41	2711.14
210539	210805	-	88	rpsP	BCI_0198	CDS	51	24239	24239	51	475.275	2540.81
210902	212251	-	449	ffh	BCI_0199	CDS	712	58297	58297	712	81.8778	1197.68
212407	212532	+	41	hyp_15	BCI_0200	CDS	1114	221	1114	221	5.04072	250.635
212553	214124	-	523	gshA	BCI_0201	CDS	11403	8100	8100	11403	0.710339	142.864
214296	214372	-	77	Arg_tRNA3	BCI_0202	RNA	2	942	942	2	471	112.85
214380	214472	-	93	Ser_tRNA1	BCI_0203	RNA	1	1778	1778	1	1778	176.356
214670	214855	-	61	csrA	BCI_0204	CDS	2143	2591	2591	2143	1.20905	391.812
215037	217691	-	884	alaS	BCI_0205	CDS	1661	75086	75086	1661	45.2053	783.514
217939	219054	-	350	recA	BCI_0206	CDS	306	36587	36587	306	119.565	964.271
219478	220260	+	260	BCI_0207	BCI_0207	CDS	23279	4937	23279	4937	4.71521	825.907
220287	220943	+	218	BCI_0208	BCI_0208	CDS	17247	667	17247	667	25.8576	729.789
221030	223597	+	855	mutS	BCI_0209	CDS	43675	4405	43675	4405	9.91487	471.202
223856	224332	-	158	ispF	BCI_0210	CDS	4514	7025	7025	4514	1.55627	410.137
224342	225067	-	241	ispD	BCI_0211	CDS	201	59740	59740	201	297.214	2286.59
225382	226005	-	207	cysC	BCI_0212	CDS	1336	31299	31299	1336	23.4274	1394.76
226002	227444	-	480	cysN	BCI_0213	CDS	957	126018	126018	957	131.68	2421.76
227457	228365	-	302	cysD	BCI_0214	CDS	1353	98515	98515	1353	72.8123	3009.09
228409	229797	-	462	cysG	BCI_0215	CDS	371	170350	170350	371	459.164	3401.26
229965	230702	-	245	cysH	BCI_0216	CDS	414	58998	58998	414	142.507	2221.32
230716	232416	-	566	cysI	BCI_0217	CDS	447	169148	169148	447	378.407	2756.71
232416	234203	-	595	cysJ	BCI_0218	CDS	1674	300526	300526	1674	179.526	4659.14
234505	234894	+	129	BCI_0219	BCI_0219	CDS	10579	3626	10579	3626	2.91754	756.476
234917	235588	-	223	hyp_16	BCI_0220	CDS	6127	21174	21174	6127	3.45585	875.867
235629	236930	-	433	eno	BCI_0221	CDS	1409	83136	83136	1409	59.0035	1771.09
236998	238629	-	543	pyrG	BCI_0222	CDS	1408	72670	72670	1408	51.6122	1234.51
238738	239628	-	297	relA_degen	relA_degen	CDS	8630	11387	11387	8630	1.31947	353.666
239976	240665	+	229	pfs	BCI_0224	CDS	16275	15660	16275	15660	1.03927	655.58
240709	241056	-	115	hesB	BCI_0225	CDS	717	9481	9481	717	13.2232	760.495
241062	242465	-	468	mrcB_degen	mrcB_degen	CDS	9372	28253	28253	9372	3.01462	556.877
242468	242923	+	151	dksA	BCI_0227	CDS	20382	397	20382	397	51.3401	1245.12
243094	244482	+	463	pcnB	BCI_0228	CDS	28977	6194	28977	6194	4.67824	577.315
244508	245011	+	167	folK	BCI_0229	CDS	11296	1126	11296	1126	10.032	623.948
245068	245865	+	265	panB	BCI_0230	CDS	19578	1517	19578	1517	12.9057	681.495
245884	246741	+	285	panC	BCI_0231	CDS	12585	4453	12585	4453	2.82618	407.332
246940	249525	+	861	leuS	BCI_0232	CDS	46303	12174	46303	12174	3.80343	496.074
249742	250779	+	345	holA	BCI_0233	CDS	17012	6198	17012	6198	2.74476	454.859
250772	251425	+	217	nadD	BCI_0234	CDS	4036	15366	4036	15366	0.262658	171.566
251137	252035	-	898	predicted_RNA	pRNA8	RNA	137	47646	47646	137	347.781	489.43
251496	253361	+	621	mrdA	BCI_0235	CDS	22284	17724	22284	17724	1.25728	331.011
253375	254466	+	363	mrdB	BCI_0236	CDS	32025	2609	32025	2609	12.2748	813.809
254594	255277	+	227	lipB	BCI_0237	CDS	51898	524	51898	524	99.042	2108.94
255313	256197	+	294	lipA	BCI_0238	CDS	33133	341	33133	341	97.1642	1039.57
256361	257662	+	411	mdtH	BCI_0239	CDS	11598	3816	11598	3816	3.03931	260.304
257862	258425	+	187	pgsA	BCI_0240	CDS	7155	6455	7155	6455	1.10844	352.946
258467	258541	+	75	Gly_tRNA2	BCI_0241	RNA	3442	6	3442	6	573.667	423.341
258685	258755	+	71	Cys_tRNA	BCI_0242	RNA	3137	3	3137	3	1045.67	407.565
258769	258854	+	86	Leu_tRNA3	BCI_0243	RNA	3858	92	3858	92	41.9348	413.813
258950	259951	+	333	pgl	BCI_0244	CDS	16874	18958	16874	18958	0.890073	467.427
259963	261264	-	433	bioA	BCI_0245	CDS	5152	39063	39063	5152	7.5821	832.181
261372	262400	+	342	bioB	BCI_0246	CDS	257483	1494	257483	1494	172.345	6944.85
262397	263575	+	392	bioF	BCI_0247	CDS	240158	2476	240158	2476	96.9943	5651.34
263562	264323	+	253	bioC	BCI_0248	CDS	84809	121	84809	121	700.901	3092.16
264316	264993	+	225	bioD	BCI_0249	CDS	43999	1757	43999	1757	25.0421	1803.85
265418	266218	+	253	BCI_0250	BCI_0250	CDS	24164	2939	24164	2939	8.22184	881.026
266278	266991	+	237	gpmA	BCI_0251	CDS	28131	1289	28131	1289	21.8239	1094.91
266998	268089	+	363	serC	BCI_0252	CDS	41781	3059	41781	3059	13.6584	1061.73
268184	269470	+	428	aroA	BCI_0253	CDS	36407	1776	36407	1776	20.4994	784.66
269532	270209	+	225	cmk	BCI_0254	CDS	35132	325	35132	325	108.098	1440.33
270342	272018	+	558	rpsA	BCI_0255	CDS	221168	474	221168	474	466.599	3656.19
272214	272378	+	54	hyp_17	BCI_0256	CDS	7357	1163	7357	1163	6.32588	1256.75
272440	273111	-	223	dsbA	BCI_0257	CDS	7257	9760	9760	7257	1.34491	403.725
273459	274484	+	341	pyrB	BCI_0258	CDS	11864	15462	11864	15462	0.7673	320.935
274498	274968	+	156	pyrI	BCI_0259	CDS	10272	5432	10272	5432	1.89102	607.394
275014	275409	+	131	L-PSP	BCI_0260	CDS	18282	8871	18282	8871	2.06087	1287.34
275505	275774	-	69	cspE	BCI_0261	CDS	353	183696	183696	353	520.385	24557.9
276002	276718	+	238	exsB	BCI_0262	CDS	50999	1626	50999	1626	31.3647	1976.63
276746	279100	-	784	lon	BCI_0263	CDS	9316	223834	223834	9316	24.0268	2633.6
279309	280574	-	421	clpX	BCI_0264	CDS	1952	57463	57463	1952	29.438	1259.06
280711	281328	-	205	clpP	BCI_0265	CDS	1097	48302	48302	1097	44.031	2173.46
281550	282860	-	436	tig	BCI_0266	CDS	2981	17868	17868	2981	5.99396	378.033
283346	284260	+	304	cyoA	BCI_0267	CDS	80307	734	80307	734	109.41	2436.8
284291	286288	+	665	cyoB	BCI_0268	CDS	119204	2794	119204	2794	42.6643	1653.52
286275	286886	+	203	cyoC	BCI_0269	CDS	19459	993	19459	993	19.5962	884.229
286891	287238	+	116	hypo_1	hypo_1	CDS	5863	1024	5863	1024	5.72559	466.232
287238	288104	+	288	cyoE	BCI_0270	CDS	16856	8332	16856	8332	2.02304	539.886
288133	289542	+	469	BCI_0271	BCI_0271	CDS	59841	4747	59841	4747	12.6061	1176.97
289571	290440	+	289	panE	BCI_0272	CDS	18036	10265	18036	10265	1.75704	575.682
290454	290750	-	98	thiI	BCI_0273	CDS	2916	4784	4784	2916	1.6406	450.303
291134	292048	+	304	ispA	BCI_0274	CDS	15927	1079	15927	1079	14.7609	483.282
292057	293958	+	623	dxs	BCI_0275	CDS	31332	1813	31332	1813	17.2819	463.917
294028	295764	+	578	argS	BCI_0276	CDS	33423	8559	33423	8559	3.90501	533.406
295815	297341	-	508	mviN	BCI_0277	CDS	26101	31545	31545	26101	1.20857	572.805
297338	297778	-	146	acpS	BCI_0278	CDS	885	20241	20241	885	22.8712	1278.85
297778	298509	-	243	pdxJ	BCI_0279	CDS	285	37119	37119	285	130.242	1409.06
298643	299548	-	301	era	BCI_0280	CDS	1356	38666	38666	1356	28.5147	1184.96
299551	300228	-	225	rnc	BCI_0281	CDS	635	23033	23033	635	36.2724	944.296
300268	301203	-	311	lepB	BCI_0282	CDS	2289	19252	19252	2289	8.41066	571.026
301212	303020	-	602	lepA	BCI_0283	CDS	1720	179937	179937	1720	104.615	2757.17
303208	303283	+	76	Thr_tRNA1	BCI_0284	RNA	711	1763	711	1763	0.40329	86.2971
303301	306174	-	957	valS	BCI_0285	CDS	11311	72183	72183	11311	6.38166	695.766
306184	306648	-	154	holC	BCI_0286	CDS	1853	10057	10057	1853	5.42742	602.404
306672	308174	-	500	pepA	BCI_0287	CDS	446	144575	144575	446	324.159	2667.25
308547	309401	+	284	nadE	BCI_0288	CDS	23651	1602	23651	1602	14.7634	768.195
309469	310314	-	281	hemK	BCI_0289	CDS	2147	15376	15376	2147	7.16162	504.751
310311	311411	-	366	prfA	BCI_0290	CDS	3562	45267	45267	3562	12.7083	1140.88
311719	312366	+	215	lolB	BCI_0291	CDS	17751	3218	17751	3218	5.51616	761.596
312363	313238	+	291	ispE	BCI_0292	CDS	21564	2674	21564	2674	8.06432	683.56
313291	314229	+	312	prsA	BCI_0293	CDS	33250	6970	33250	6970	4.77044	983.054
314339	314920	+	193	pth	BCI_0294	CDS	10037	15436	10037	15436	0.650233	479.719
314970	316040	+	356	ychF	BCI_0295	CDS	25028	1792	25028	1792	13.9665	648.51
316118	316906	+	262	fabI	BCI_0296	CDS	31806	338	31806	338	94.1006	1119.82
317059	318996	+	645	rnb	BCI_0297	CDS	57873	956	57873	956	60.5366	827.669
319003	319752	-	249	pyrF	BCI_0298	CDS	3613	9714	9714	3613	2.68862	359.864
319787	320101	-	98	hyp_18	BCI_0299	CDS	216	5336	5336	216	24.7037	502.262
320418	321017	+	199	ribA	BCI_0300	CDS	3335	1987	3335	1987	1.67841	154.591
321060	322034	-	324	cysB	BCI_0301	CDS	2878	33843	33843	2878	11.7592	963.527
322283	324856	-	857	topA	BCI_0302	CDS	12897	62743	62743	12897	4.86493	675.343
325306	326070	+	254	hyp_19	BCI_0303	CDS	3345	4864	3345	4864	0.687706	121.479
326265	326567	+	100	hyp_20	BCI_0304	CDS	4303	203	4303	203	21.197	396.928
326729	328180	+	483	cls	BCI_0305	CDS	11941	1632	11941	1632	7.31679	228.052
328635	329045	+	136	hns	BCI_0306	CDS	10563	3288	10563	3288	3.21259	716.454
329091	329966	-	291	htpX	BCI_0307	CDS	11639	40302	40302	11639	3.46267	1277.54
330171	330659	-	162	ftn	BCI_0308	CDS	1183	26286	26286	1183	22.2198	1496.75
330747	332225	-	492	zwf	BCI_0309	CDS	1391	126883	126883	1391	91.2171	2378.91
332634	334097	+	483	pykA	BCI_0310	CDS	38355	636	38355	636	60.3066	732.513
334517	335866	+	449	BCI_0311	BCI_0311	CDS	19409	2597	19409	2597	7.47362	398.747
336040	337047	-	335	ruvB	BCI_0312	CDS	2527	22400	22400	2527	8.86427	616.799
337056	337646	-	196	ruvA	BCI_0313	CDS	2828	8232	8232	2828	2.91089	387.427
337688	338209	-	173	ruvC	BCI_0314	CDS	12635	15830	15830	12635	1.25287	844.063
338703	340472	-	589	aspS	BCI_0315	CDS	3651	48655	48655	3651	13.3265	761.996
340697	341431	-	244	BCI_0316	BCI_0316	CDS	1980	49873	49873	1980	25.1884	1885.45
341666	341755	+	90	Ser_tRNA2	BCI_0317	RNA	3549	308	3549	308	11.5227	363.751
341775	343067	-	430	serS	BCI_0318	CDS	15258	23631	23631	15258	1.54876	506.937
343217	343843	-	208	lolA	BCI_0319	CDS	206	10894	10894	206	52.8835	483.13
343945	345972	-	666	ftsK	BCI_0320	CDS	4977	16374	16374	4977	3.28993	226.788
346139	347098	+	319	trxB	BCI_0321	CDS	23303	3733	23303	3733	6.24243	673.847
347213	347431	+	72	infA	BCI_0322	CDS	4878	221	4878	221	22.0724	624.956
347607	348335	+	242	artP	BCI_0323	CDS	26986	1836	26986	1836	14.6983	1028.64
348356	349084	+	242	artI	BCI_0324	CDS	25013	1410	25013	1410	17.7397	953.434
349081	349776	+	231	artQ	BCI_0325	CDS	15739	1806	15739	1806	8.71484	628.5
349798	350469	+	223	artM	BCI_0326	CDS	11533	911	11533	911	12.6597	477.065
350805	351116	+	103	rpsJ	BCI_0327	CDS	47357	86	47357	86	550.663	4241.18
351142	351780	+	212	rplC	BCI_0328	CDS	98480	654	98480	654	150.581	4285.02
351792	352397	+	201	rplD	BCI_0329	CDS	80454	1325	80454	1325	60.72	3692.26
352394	352696	+	100	rplW	BCI_0330	CDS	39067	2256	39067	2256	17.3169	3603.71
352716	353534	+	272	rplB	BCI_0331	CDS	137133	3223	137133	3223	42.5482	4650.65
353556	353834	+	92	rpsS	BCI_0332	CDS	42257	95	42257	95	444.811	4236.93
353865	354197	+	110	rplV	BCI_0333	CDS	52716	179	52716	179	294.503	4420.69
354214	354915	+	233	rpsC	BCI_0334	CDS	151511	388	151511	388	390.492	5998.3
354927	355340	+	137	rplP	BCI_0335	CDS	100835	170	100835	170	593.147	6789.39
355337	355528	+	63	rpmC	BCI_0336	CDS	44915	61	44915	61	736.311	6576.44
355521	355790	+	89	rpsQ	BCI_0337	CDS	80184	394	80184	394	203.513	8310.71
355831	356313	+	160	rplN	BCI_0338	CDS	14232	421	14232	421	33.8052	820.514
356325	356639	+	104	rplX	BCI_0339	CDS	14309	73	14309	73	196.014	1269.16
356663	357208	+	181	rplE	BCI_0340	CDS	25804	165	25804	165	156.388	1315.07
357231	357536	+	101	rpsN	BCI_0341	CDS	21229	46	21229	46	461.5	1938.87
357569	357967	+	132	rpsH	BCI_0342	CDS	25156	126	25156	126	199.651	1757.96
357982	358515	+	177	rp1F	BCI_0343	CDS	30852	610	30852	610	50.577	1607.87
358529	358876	+	115	rplR	BCI_0344	CDS	23627	134	23627	134	176.321	1895.18
358888	359391	+	167	rpsE	BCI_0345	CDS	30220	371	30220	371	81.4555	1669.24
359395	359577	+	60	rpmD	BCI_0346	CDS	11518	178	11518	178	64.7079	1770.79
359578	360009	+	143	rplO	BCI_0347	CDS	26629	126	26629	126	211.341	1717.75
360025	361359	+	444	secY	BCI_0348	CDS	78286	928	78286	928	84.3599	1626.45
361397	361513	+	38	rpmJ	BCI_0349	CDS	6636	78	6636	78	85.0769	1610.88
361539	361895	+	118	rpsM	BCI_0350	CDS	28702	130	28702	130	220.785	2243.73
361920	362309	+	129	rpsK	BCI_0351	CDS	30498	142	30498	142	214.775	2180.83
362356	362976	+	206	rpsD	BCI_0352	CDS	45389	1343	45389	1343	33.7967	2032.47
362997	363980	+	327	rpoA	BCI_0353	CDS	68539	7747	68539	7747	8.84717	1933.44
364044	364430	+	128	rplQ	BCI_0354	CDS	17609	3497	17609	3497	5.03546	1269.01
364453	364530	-	78	Thr_tRNA2	BCI_0355	RNA	173	1701	1701	173	9.83237	201.164
364558	364629	-	72	Gly_tRNA	BCI_0356	RNA	10	2040	2040	10	204	261.359
364646	364727	-	82	Tyr_tRNA	BCI_0357	RNA	4	2993	2993	4	748.25	336.692
364746	364818	-	73	Thr_tRNA	BCI_0358	RNA	20	1655	1655	20	82.75	209.13
365098	366036	+	312	coaA	BCI_0359	CDS	4150	8492	4150	8492	0.488695	122.697
366098	367033	+	311	prmB	BCI_0360	CDS	19132	1249	19132	1249	15.3179	567.466
367048	368115	+	355	aroC	BCI_0361	CDS	19475	311	19475	311	62.6206	506.045
368366	369586	+	406	fabB	BCI_0362	CDS	34229	315	34229	315	108.663	777.693
369660	370790	+	376	pdxB	BCI_0363	CDS	72215	1398	72215	1398	51.6559	1771.66
370798	371601	+	267	truA	BCI_0364	CDS	45798	976	45798	976	46.9242	1582.25
371713	372600	+	295	accD	BCI_0365	CDS	14737	2913	14737	2913	5.05905	460.816
372643	373923	+	426	folC	BCI_0366	CDS	12798	5715	12798	5715	2.23937	277.123
374317	374802	+	161	cvpA	BCI_0367	CDS	8345	207	8345	207	40.314	478.124
374842	376260	+	472	purF	BCI_0368	CDS	24740	1614	24740	1614	15.3284	483.502
376380	377834	-	484	nuoN	BCI_0369	CDS	11770	20238	20238	11770	1.71946	385.711
377693	377763	+	70	predicted_RNA	pRNA9	RNA	453	158	453	158	2.86709	59.6953
377859	379382	-	507	nuoM	BCI_0370	CDS	13836	41727	41727	13836	3.01583	759.188
379358	379507	+	149	predicted_RNA	pRNA10	RNA	14820	16041	14820	16041	0.923883	917.492
379432	381297	-	621	nuoL	BCI_0371	CDS	11381	74541	74541	11381	6.5496	1107.25
381294	381596	-	100	nuoK	BCI_0372	CDS	810	10272	10272	810	12.6815	947.535
381644	382141	-	165	nuoJ	BCI_0373	CDS	1627	27445	27445	1627	16.8685	1534.33
382165	382707	-	180	nuoI	BCI_0374	CDS	1554	24500	24500	1554	15.7658	1255.55
382731	383696	-	321	nuoH	BCI_0375	CDS	2762	25660	25660	2762	9.29037	737.381
383705	386434	-	909	nuoG	BCI_0376	CDS	5803	119674	119674	5803	20.6228	1214.44
386516	387850	-	444	nuoF	BCI_0377	CDS	91	49381	49381	91	542.648	1025.93
387847	388350	-	167	nuoE	BCI_0378	CDS	180	16928	16928	180	94.0444	935.038
388353	390140	-	595	nuoCD	BCI_0379	CDS	4346	65241	65241	4346	15.0117	1011.45
390249	390923	-	224	nuoB	BCI_0380	CDS	802	47417	47417	802	59.1234	1952.66
390987	391373	-	128	nuoA	BCI_0381	CDS	3582	27881	27881	3582	7.78364	2009.27
391621	392823	+	400	ackA	BCI_0382	CDS	48715	2580	48715	2580	18.8818	1123.42
392877	395012	+	711	pta	BCI_0383	CDS	37190	25073	37190	25073	1.48327	482.499
395031	395297	-	88	BCI_0384	BCI_0384	CDS	1792	10441	10441	1792	5.82645	1094.46
395299	396429	-	376	nrdB	BCI_0385	CDS	1197	43925	43925	1197	36.6959	1077.62
396480	398762	-	760	nrdA	BCI_0386	CDS	6329	72258	72258	6329	11.417	877.026
399298	401841	+	847	gyrA	BCI_0387	CDS	201283	3776	201283	3776	53.3059	2192.12
402170	403297	+	375	ddlA	BCI_0388	CDS	53963	3515	53963	3515	15.3522	1327.41
403289	403362	-	74	Pro_tRNA	BCI_0389	RNA	61	1508	1508	61	24.7213	187.979
403459	403743	-	94	rplY	BCI_0390	CDS	2562	19227	19227	2562	7.50468	1886.79
403876	404463	-	195	nlpC	BCI_0391	CDS	3800	11558	11558	3800	3.04158	546.749
404495	405373	-	292	nfo	BCI_0392	CDS	309	13619	13619	309	44.0744	430.232
405526	407004	+	492	lysP	BCI_0393	CDS	20781	1206	20781	1206	17.2313	389.62
407148	407810	+	220	folE	BCI_0394	CDS	6483	4580	6483	4580	1.4155	271.828
407840	408421	-	193	dcd	BCI_0395	CDS	959	14606	14606	959	15.2304	698.094
408614	410257	+	547	metG	BCI_0396	CDS	45992	51110	45992	51110	0.899863	775.595
410283	411689	-	468	gnd	BCI_0397	CDS	4962	112184	112184	4962	22.6086	2211.19
411892	412515	-	207	hisI	BCI_0398	CDS	2514	59135	59135	2514	23.5223	2635.21
412509	413285	-	258	hisF	BCI_0399	CDS	151	87576	87576	151	579.974	3131.16
413267	414013	-	248	hisA	BCI_0400	CDS	246	102182	102182	246	415.374	3800.69
414016	414609	-	197	hisH	BCI_0401	CDS	166	77765	77765	166	468.464	3641.31
414606	415676	-	356	hisB	BCI_0402	CDS	342	155173	155173	342	453.722	4020.74
415682	416764	-	360	hisC	BCI_0403	CDS	2688	179994	179994	2688	66.9621	4612.07
416761	418074	-	437	hisD	BCI_0404	CDS	1197	196465	196465	1197	164.131	4147.09
418078	418977	-	299	hisG	BCI_0405	CDS	1289	189467	189467	1289	146.988	5845.24
419623	420252	+	209	BCI_0406	BCI_0406	CDS	44664	2073	44664	2073	21.5456	1971.29
420279	421469	-	396	aspC	BCI_0407	CDS	17382	33632	33632	17382	1.93488	783.426
421550	422953	-	467	asnC	BCI_0408	CDS	943	30353	30353	943	32.1877	599.549
423379	424389	+	336	pyrD	BCI_0409	CDS	64637	4350	64637	4350	14.8591	1774.53
424522	425043	-	173	fabA	BCI_0410	CDS	1674	7471	7471	1674	4.46296	398.357
425090	426844	-	584	hyp_21	BCI_0411	CDS	1201	35123	35123	1201	29.2448	554.778
427111	427428	-	105	hspQ	BCI_0412	CDS	902	38746	38746	902	42.9557	3403.91
427534	428025	-	163	dsvC	BCI_0413	CDS	984	11215	11215	984	11.3974	634.676
428047	428131	+	85	Ser_tRNA	BCI_0414	RNA	3490	11	3490	11	317.273	378.745
428219	429154	-	311	fmt	BCI_0415	CDS	18428	15394	15394	18428	0.835359	456.595
429204	429707	-	167	def	BCI_0416	CDS	1189	10142	10142	1189	8.52986	560.205
429939	430535	+	198	hyp_22	BCI_0417	CDS	20560	1481	20560	1481	13.8825	957.851
430619	431383	+	254	aroE	BCI_0418	CDS	9710	1773	9710	1773	5.47659	352.635
431428	434919	-	1163	BCI_0419	BCI_0419	CDS	14803	56129	56129	14803	3.79173	445.192
434949	436340	-	463	fumC	BCI_0420	CDS	5733	25744	25744	5733	4.49049	512.903
436947	437022	+	76	Asn_tRNA	BCI_0421	RNA	4770	5	4770	5	954	578.955
437173	438279	+	368	trmU	BCI_0422	CDS	80104	9699	80104	9699	8.259	2007.92
438606	439997	+	463	purB	BCI_0423	CDS	119389	8757	119389	8757	13.6336	2378.61
440033	441280	-	415	lolE	BCI_0424	CDS	4349	20107	20107	4349	4.62336	446.93
441277	441987	-	236	lolD	BCI_0425	CDS	1645	13547	13547	1645	8.23526	529.507
441980	443173	-	397	lolC	BCI_0426	CDS	1601	26247	26247	1601	16.3941	609.859
443281	443814	-	177	BCI_0427	BCI_0427	CDS	664	22368	22368	664	33.6867	1165.72
443829	444194	-	121	BCI_0428	BCI_0428	CDS	211	12832	12832	211	60.8152	978.249
444191	444991	-	266	BCI_0429	BCI_0429	CDS	5522	31890	31890	5522	5.77508	1105.89
445036	446034	-	332	holB	BCI_0430	CDS	5495	36103	36103	5495	6.57015	1003.1
446037	446675	-	212	tmk	BCI_0431	CDS	1087	20152	20152	1087	18.5391	876.844
446730	447533	-	267	pabC	BCI_0432	CDS	679	34262	34262	679	50.4595	1183.7
447634	447867	-	77	acpP	BCI_0433	CDS	386	70343	70343	386	182.236	8426.95
448023	448757	-	244	fabG	BCI_0434	CDS	1221	87074	87074	1221	71.3137	3291.84
448741	449703	-	320	fabD	BCI_0435	CDS	3067	97397	97397	3067	31.7564	2807.6
449723	450676	-	317	fabH	BCI_0436	CDS	245	186126	186126	245	759.698	5416.12
450723	450824	+	33	hyp_23	BCI_0437	CDS	16	5697	16	5697	0.0028085	4.47246
451081	451251	-	56	rpmF	BCI_0438	CDS	147	6807	6807	147	46.3061	1121.26
451394	452362	-	322	rluC	BCI_0439	CDS	10374	15457	15457	10374	1.48997	442.802
452880	454649	+	589	rne	BCI_0440	CDS	12642	34301	12642	34301	0.368561	197.989
454097	455144	-	1047	predicted_RNA	pRNA11	RNA	642	159555	159555	642	248.528	1405.74
455005	456099	+	364	pyrC	BCI_0441	CDS	7489	1682	7489	1682	4.45244	189.785
456215	458071	+	618	sppA	BCI_0442	CDS	65938	3982	65938	3982	16.559	984.209
458117	459187	+	356	gapA	BCI_0443	CDS	104297	475	104297	475	219.573	2702.48
459430	460125	+	231	minC	BCI_0444	CDS	85568	1232	85568	1232	69.4545	3416.96
460142	460954	+	270	minD	BCI_0445	CDS	49768	524	49768	524	94.9771	1700.3
460958	461239	+	93	minE	BCI_0446	CDS	22131	513	22131	513	43.1404	2195.12
461260	461958	-	232	BCI_0447	BCI_0447	CDS	18523	16021	16021	18523	0.864925	637.004
462025	462972	-	315	BCI_0448	BCI_0448	CDS	2164	53852	53852	2164	24.8854	1577
463060	463899	-	279	BCI_0449	BCI_0449	CDS	595	66907	66907	595	112.449	2212.11
463921	464721	-	266	BCI_0450	BCI_0450	CDS	679	69910	69910	679	102.96	2424.36
464758	465726	-	322	BCI_0451	BCI_0451	CDS	925	69096	69096	925	74.6984	1979.42
466225	467559	+	444	terC	BCI_0452	CDS	16785	2819	16785	2819	5.95424	348.721
467724	469082	-	452	pabB	BCI_0453	CDS	13442	16841	16841	13442	1.25286	343.692
469204	470178	+	324	BCI_0454	BCI_0454	CDS	14629	4257	14629	4257	3.43646	416.495
470183	470258	-	76	Ala_tRNA2	BCI_0455	RNA	9	1429	1429	9	158.778	173.444
470279	471679	-	466	gltX	BCI_0456	CDS	6814	42387	42387	6814	6.22058	839.048
471790	471862	+	73	Val_tRNA	BCI_0457	RNA	3042	11	3042	11	276.545	384.394
471901	471976	+	76	Lys_tRNA	BCI_0458	RNA	2764	252	2764	252	10.9683	335.478
472023	473540	-	505	emrB	BCI_0459	CDS	22547	43840	43840	22547	1.94438	800.791
473575	474786	-	403	emrA	BCI_0460	CDS	1986	97130	97130	1986	48.9074	2223.25
475083	475517	-	144	sufE	BCI_0461	CDS	621	13330	13330	621	21.4654	853.902
475533	476756	-	407	sufS	BCI_0462	CDS	2937	70837	70837	2937	24.1188	1605.48
476753	478051	-	432	sufD	BCI_0463	CDS	8898	43125	43125	8898	4.84659	920.843
478032	478772	-	246	sufC	BCI_0464	CDS	967	29167	29167	967	30.1624	1093.7
478847	480322	-	491	sufB	BCI_0465	CDS	2013	78820	78820	2013	39.1555	1480.8
480337	480696	-	119	sufA	BCI_0466	CDS	82	18120	18120	82	220.976	1404.6
480843	483227	-	794	pheT	BCI_0467	CDS	17527	40045	40045	17527	2.28476	465.23
483244	484227	-	327	pheS	BCI_0468	CDS	8081	23552	23552	8081	2.91449	664.386
484295	484657	-	120	rplT	BCI_0469	CDS	155	19828	19828	155	127.923	1524.19
484685	484882	-	65	rpmI	BCI_0470	CDS	48	15948	15948	48	332.25	2263.25
484928	485443	-	171	infC	BCI_0471	CDS	208	43310	43310	208	208.221	2336.32
485475	487403	-	642	thrS	BCI_0472	CDS	4966	51953	51953	4966	10.4617	746.476
487653	488375	-	240	dnaQ	BCI_0473	CDS	1061	1538	1538	1061	1.44958	59.1133
488425	488886	+	153	rnhA	BCI_0474	CDS	2697	1602	2697	1602	1.68352	162.603
488971	489744	+	257	gloB	BCI_0475	CDS	5436	1174	5436	1174	4.63032	195.113
489766	490602	-	278	hyp_24	BCI_0476	CDS	16800	2935	2935	16800	0.174702	97.3876
490684	491706	-	340	mltC	BCI_0477	CDS	8258	8826	8826	8258	1.06878	239.456
491812	492045	-	77	hyp_25	BCI_0478	CDS	971	1938	1938	971	1.99588	232.168
492130	493287	-	385	BCI_0479	BCI_0479	CDS	8741	11393	11393	8741	1.3034	272.972
493284	493691	-	408	gene	gene_2	CDS	789	7400	7400	789	9.37896	167.306
493691	494254	-	187	hyp_26	BCI_0481	CDS	734	26239	26239	734	35.748	1294.33
494302	495255	-	317	gshB	BCI_0482	CDS	916	52548	52548	916	57.3668	1529.1
495314	495937	-	207	sodA	BCI_0483	CDS	2383	62793	62793	2383	26.3504	2798.22
495970	496542	-	190	yhgI	BCI_0484	CDS	6411	26401	26401	6411	4.11808	1281.76
496690	497451	+	253	bioH	BCI_0485	CDS	14148	728	14148	728	19.4341	515.84
497561	497634	+	74	Ile_tRNA	BCI_0486	RNA	2684	6	2684	6	447.333	334.573
497662	497734	+	73	Ala_tRNA	BCI_0487	RNA	4256	6	4256	6	709.333	537.798
497784	498227	+	147	BCI_0488	BCI_0488	CDS	14904	1979	14904	1979	7.53108	935.246
498343	498714	+	123	dsrE	BCI_0489	CDS	7405	1789	7405	1789	4.13918	555.342
498726	499085	+	119	dsrF	BCI_0490	CDS	8714	3200	8714	3200	2.72313	675.477
499095	499382	+	95	dsrH	BCI_0491	CDS	5353	666	5353	666	8.03754	519.773
499440	499814	+	124	rpsL	BCI_0492	CDS	11459	207	11459	207	55.3575	852.443
499873	500343	+	156	rpsG	BCI_0493	CDS	16383	301	16383	301	54.4286	968.744
500448	502565	+	705	fusA	BCI_0494	CDS	78820	925	78820	925	85.2108	1031.31
502681	503865	+	394	tuf	BCI_0495	CDS	147002	862	147002	862	170.536	3441.65
503931	504314	+	127	secE	BCI_0496	CDS	25694	495	25694	495	51.9071	1866.24
504315	504860	+	181	nusG	BCI_0497	CDS	60694	177	60694	177	342.904	3093.2
504916	505344	+	142	rplK	BCI_0498	CDS	39448	459	39448	459	85.9434	2562.58
505348	506052	+	234	rplA	BCI_0499	CDS	64579	1927	64579	1927	33.5127	2545.75
506232	506732	+	166	rplJ	BCI_0500	CDS	56166	388	56166	388	144.758	3121.09
506768	507133	+	121	rplL	BCI_0501	CDS	36821	131	36821	131	281.076	2807.05
507307	511329	+	1340	rpoB	BCI_0502	CDS	168215	1389	168215	1389	121.105	1157.98
511418	515644	+	1408	rpoC	BCI_0503	CDS	295925	2204	295925	2204	134.267	1938.74
515662	516690	+	342	murB	BCI_0504	CDS	53663	1919	53663	1919	27.964	1447.4
516692	517540	+	282	birA	BCI_0505	CDS	9800	3544	9800	3544	2.76524	320.566
517580	517697	-	118	rrfA	BCI_0157	RNA	6	22	22	6	3.66667	1.71981
517730	520631	-	2902	rrlA	BCI_0156	RNA	0	0	0	0	0	0
520716	520788	-	73	Glu_tRNA2	BCI_0155	RNA	0	0	0	0	0	0
520902	522449	-	1548	rrsA	BCI_0154	RNA	0	0	0	0	0	0
522858	524270	-	470	lpdA	BCI_0510	CDS	1319	33025	33025	1319	25.0379	648.164
524329	525618	-	358	aceF	BCI_0511	CDS	1524	11444	11444	1524	7.50919	294.873
525629	528298	-	889	aceE	BCI_0512	CDS	2876	40013	40013	2876	13.9127	415.183
528653	529540	+	295	nadC	BCI_0513	CDS	7411	2014	7411	2014	3.67974	231.737
529591	530202	+	203	coaE	BCI_0514	CDS	3437	5	3437	5	687.4	156.179
530326	532893	-	856	secA_degen	secA_degen	CDS	5	7541	7541	5	1508.2	81.2635
533136	533657	+	173	hyp_27	BCI_0516	CDS	2273	3541	2273	3541	0.641909	121.197
533781	534953	-	390	ftsZ	BCI_0517	CDS	1698	24967	24967	1698	14.7038	590.53
535265	536737	-	490	murC	BCI_0518	CDS	1536	34921	34921	1536	22.735	657.402
536809	537885	-	358	murG	BCI_0519	CDS	254	60380	60380	254	237.717	1555.79
538203	539543	-	446	murD	BCI_0520	CDS	6948	65432	65432	6948	9.41739	1353.3
539545	540627	-	360	mraY	BCI_0521	CDS	4243	56884	56884	4243	13.4066	1457.56
540621	541982	-	453	murF	BCI_0522	CDS	5801	33624	33624	5801	5.79624	684.686
541985	543472	-	495	murE	BCI_0523	CDS	3892	43696	43696	3892	11.2271	814.286
543659	544612	-	317	mraW	BCI_0524	CDS	654	30792	30792	654	47.0826	896.022
544713	545579	-	288	queF	BCI_0525	CDS	9025	21833	21833	9025	2.41917	699.296
545764	546558	-	264	map	BCI_0526	CDS	982	15812	15812	982	16.1018	552.488
546863	547561	+	232	rpsB	BCI_0527	CDS	23725	599	23725	599	39.6077	943.319
547604	548446	+	280	tsf	BCI_0528	CDS	28935	625	28935	625	46.296	953.248
548506	549255	+	249	pyrH	BCI_0529	CDS	30880	346	30880	346	89.2486	1143.98
549304	549861	+	185	frr	BCI_0530	CDS	23856	1641	23856	1641	14.5375	1189.5
550015	551211	+	398	dxr	BCI_0531	CDS	19649	17280	19649	17280	1.13709	455.405
550898	551238	-	340	predicted_RNA	pRNA12	RNA	65	9541	9541	65	146.785	258.854
551341	552102	+	253	uppS	BCI_0532	CDS	16262	579	16262	579	28.0864	592.917
552112	552966	+	284	cdsA	BCI_0533	CDS	16528	2428	16528	2428	6.80725	536.837
552986	554365	+	459	ecfE	BCI_0534	CDS	40870	4551	40870	4551	8.98044	821.357
554370	556751	+	793	OMP85	BCI_0535	CDS	34804	14633	34804	14633	2.37846	404.852
556830	557327	+	165	ompH	BCI_0536	CDS	52308	155	52308	155	337.471	2924.32
557583	558032	+	149	fabZ	BCI_0537	CDS	10047	1197	10047	1197	8.39348	622
558257	561748	+	1163	dnaE	BCI_0538	CDS	88603	6319	88603	6319	14.0217	702.763
561765	562724	+	319	accA	BCI_0539	CDS	28340	788	28340	788	35.9645	819.501
562746	563936	-	396	metC	BCI_0540	CDS	779	73776	73776	779	94.706	1718.54
564244	564918	+	224	mutH	BCI_0541	CDS	7256	7059	7256	7059	1.02791	298.806
564708	564858	-	150	predicted_RNA	pRNA13	RNA	0	4619	4619	0	4619	284.051
565076	565555	+	159	nudH	BCI_0542	CDS	10672	1327	10672	1327	8.0422	619.14
565763	566620	+	285	lgt	BCI_0543	CDS	10901	362	10901	362	30.1133	352.827
566651	567445	+	264	thyA	BCI_0544	CDS	22405	8033	22405	8033	2.78912	782.855
567517	570813	+	1098	recC	BCI_0545	CDS	51768	9789	51768	9789	5.28838	434.91
570857	574408	+	1183	recB	BCI_0546	CDS	40590	44516	40590	44516	0.911807	316.501
573560	574082	-	522	predicted_RNA	pRNA14	RNA	0	5460	5460	0	5460	96.4856
574133	574356	-	223	predicted_RNA	pRNA15	RNA	2305	11686	11686	2305	5.06985	483.394
574456	576315	+	619	recD	BCI_0547	CDS	4471	12314	4471	12314	0.363083	66.6276
574699	574964	-	265	predicted_RNA	pRNA16	RNA	0	6427	6427	0	6427	223.719
576514	577146	+	210	crp	BCI_0548	CDS	28456	373	28456	373	76.2895	1249.96
577230	577820	-	196	pabA	BCI_0549	CDS	5595	2990	2990	5595	0.534406	140.72
577980	579392	+	470	dnaB	BCI_0550	CDS	14562	3052	14562	3052	4.7713	285.801
579471	579543	+	73	Arg_tRNA	BCI_0551	RNA	351	508	351	508	0.690945	44.3532
579809	581704	+	631	dnaK	BCI_0552	CDS	76265	466	76265	466	163.659	1114.9
581803	582921	+	372	dnaJ	BCI_0553	CDS	29765	2806	29765	2806	10.6076	738.08
582954	583217	-	87	rpsT	BCI_0554	CDS	7462	13168	13168	7462	1.76467	1396.18
583427	584410	+	327	ribF	BCI_0555	CDS	27493	1260	27493	1260	21.8198	775.559
584422	587238	+	938	ileS	BCI_0556	CDS	107077	6829	107077	6829	15.6797	1053.01
587238	587741	+	167	lspA	BCI_0557	CDS	26406	775	26406	775	34.0723	1458.57
587770	588711	+	313	ispH	BCI_0558	CDS	78017	285	78017	285	273.744	2299.24
588861	590006	+	381	carA	BCI_0559	CDS	32053	1685	32053	1685	19.0226	776.04
590025	593264	+	1079	carB	BCI_0560	CDS	92378	4406	92378	4406	20.9664	789.746
593307	593804	+	165	folA	BCI_0561	CDS	3297	9178	3297	9178	0.359229	184.321
593806	594672	-	288	apaH	BCI_0562	CDS	867	41580	41580	867	47.9585	1331.78
594902	595717	-	271	ksgA	BCI_0563	CDS	22599	4933	4933	22599	0.218284	167.912
595710	596714	-	334	pdxA	BCI_0564	CDS	1511	24721	24721	1511	16.3607	682.747
596701	598002	-	433	surA	BCI_0565	CDS	2456	31901	31901	2456	12.989	679.605
598051	598383	+	110	smpA	BCI_0566	CDS	4340	3545	4340	3545	1.22426	363.946
598411	598740	-	109	hyp_28	BCI_0567	CDS	5921	9185	9185	5921	1.55126	777.308
598916	599401	+	161	smpB	BCI_0568	CDS	50663	145	50663	145	349.4	2902.72
599480	599854	+	375	sRNA	BCI_0569	RNA	3313210	2250	3313210	2250	1472.54	81500.1
599882	600625	-	247	cysQ	BCI_0570	CDS	6611	35086	35086	6611	5.30722	1310.32
600646	601098	-	150	rplI	BCI_0571	CDS	319	28199	28199	319	88.3981	1734.13
601184	601411	-	75	rpsR	BCI_0572	CDS	112	11135	11135	112	99.4196	1369.52
601415	601768	-	117	priN	BCI_0573	CDS	125	18581	18581	125	148.648	1464.95
601772	602149	-	125	rpsF	BCI_0574	CDS	532	14658	14658	532	27.5526	1081.7
602303	603049	-	248	BCI_0575	BCI_0575	CDS	526	18532	18532	526	35.2319	689.304
603138	605387	-	749	rnr	BCI_0576	CDS	1100	70565	70565	1100	64.15	869.056
605490	606788	-	432	purA	BCI_0577	CDS	748	87420	87420	748	116.872	1866.67
606892	607893	-	333	hflC	BCI_0578	CDS	950	35758	35758	950	37.64	990.534
607900	609060	-	386	hflK	BCI_0579	CDS	306	33482	33482	306	109.418	800.137
609103	610386	-	427	hflX	BCI_0580	CDS	686	25306	25306	686	36.8892	546.683
610494	610754	-	86	hfq	BCI_0581	CDS	683	3460	3460	683	5.06589	371.123
610770	611036	+	88	hyp_29	BCI_0582	CDS	179	3054	179	3054	0.0586117	18.7634
611067	611996	-	309	miaA	BCI_0583	CDS	411	4616	4616	411	11.2311	137.799
612006	613814	-	602	mutL	BCI_0584	CDS	6701	24653	24653	6701	3.679	377.758
613891	615108	-	382	BCI_0585	BCI_0585	CDS	3561	20181	20181	3561	5.66723	487.326
615477	616031	-	184	orn	BCI_0586	CDS	3010	59793	59793	3010	19.8648	2997.59
616407	617285	+	292	psd	BCI_0587	CDS	10442	9720	10442	9720	1.07428	329.869
617561	618544	-	327	genX	BCI_0588	CDS	4682	30287	30287	4682	6.46882	854.375
618632	619201	-	189	efp	BCI_0589	CDS	5463	14678	14678	5463	2.6868	716.383
619235	620254	+	339	yodO	BCI_0590	CDS	37243	22280	37243	22280	1.67159	1013.41
620344	621984	-	546	groEL	BCI_0591	CDS	547	453338	453338	547	828.771	7658.96
622026	622319	-	97	groES	BCI_0592	CDS	128	70244	70244	128	548.781	6680.02
622572	623990	+	472	aspA	BCI_0593	CDS	23913	1128	23913	1128	21.1995	467.339
624068	624140	+	73	Phe_tRNA	BCI_0594	RNA	1218	3	1218	3	406	153.909
624393	624995	-	200	BCI_0595	BCI_0595	CDS	888	101321	101321	888	114.1	4673.15
625182	626243	+	353	queA	BCI_0596	CDS	49128	9843	49128	9843	4.99116	1283.79
626305	627417	+	370	tgt	BCI_0597	CDS	38665	2217	38665	2217	17.4402	963.954
627439	627771	+	110	yajC	BCI_0598	CDS	12327	642	12327	642	19.2009	1033.72
627805	629643	+	612	secD	BCI_0599	CDS	88383	5237	88383	5237	16.8766	1332.16
629654	630574	+	306	secF	BCI_0600	CDS	45051	2453	45051	2453	18.3657	1358.07
630832	631986	+	378	ribD	BCI_0601	CDS	67352	5910	67352	5910	11.3963	1643.61
632056	632574	+	172	ribH	BCI_0602	CDS	21939	206	21939	206	106.5	1176.6
632601	633020	+	139	nusB	BCI_0603	CDS	24573	389	24573	389	63.1697	1630.74
633102	634079	+	325	thiL	BCI_0604	CDS	35336	2064	35336	2064	17.1202	1002.94
634087	634593	+	168	pgpA	BCI_0605	CDS	26905	836	26905	836	32.183	1477.28
634648	636423	+	591	OMP85_b	BCI_0606	CDS	84359	6919	84359	6919	12.1924	1316.69
636420	639368	+	982	hyp_30	BCI_0607	CDS	93575	9950	93575	9950	9.40452	878.999
639384	639917	-	177	ppa	BCI_0608	CDS	5363	8747	8747	5363	1.63099	455.854
640077	641750	-	557	proS	BCI_0609	CDS	1180	45548	45548	1180	38.6	754.318
641839	641924	-	86	Leu_tRNA	BCI_0610	RNA	2	2198	2198	2	1099	235.76
642053	642958	-	301	nadK	BCI_0611	CDS	1590	3873	3873	1590	2.43585	118.692
643042	643638	+	198	grpE	BCI_0612	CDS	25253	1272	25253	1272	19.853	1176.49
643689	644357	-	222	ung	BCI_0613	CDS	2041	17268	17268	2041	8.46056	717.512
644411	646060	-	549	nadB	BCI_0614	CDS	8725	17267	17267	8725	1.97903	290.125
644625	645026	+	401	predicted_RNA	pRNA17	RNA	8069	0	8069	0	8069	185.616
646228	646303	-	76	Met_tRNA1	BCI_0615	RNA	3	1086	1086	3	362	131.812
646370	648208	-	612	rpoD	BCI_0616	CDS	4182	103421	103421	4182	24.73	1558.83
648290	650077	-	595	dnaG	BCI_0617	CDS	3234	42809	42809	3234	13.2372	663.679
650171	650440	-	71	rpsU	BCI_0618	CDS	1968	7879	7879	1968	4.00356	1023.65
650587	651612	+	341	gcp	BCI_0619	CDS	35753	228	35753	228	156.811	967.16
651654	652019	+	121	folB	BCI_0620	CDS	8018	128	8018	128	62.6406	611.253
652158	652985	+	275	BCI_0621	BCI_0621	CDS	24483	3757	24483	3757	6.51664	821.244
653051	654289	-	412	cca	BCI_0622	CDS	23493	47080	47080	23493	2.004	1054.09
655168	655803	+	211	ribB	BCI_0623	CDS	40767	1411	40767	1411	28.8923	1782.24
655968	656717	-	249	plsC	BCI_0624	CDS	6061	15015	15015	6061	2.47731	556.245
656963	657370	-	135	holD	BCI_0625	CDS	9467	604	604	9467	0.0638006	41.2708
657007	657212	+	205	predicted_RNA	pRNA18	RNA	5811	386	5811	386	15.0544	261.479
657363	659153	-	591	deaD	BCI_0626	CDS	3580	47289	47289	3580	13.2092	738.096
659552	661645	-	697	pnp	BCI_0627	CDS	3868	159727	159727	3868	41.2945	2113.91
661756	662061	-	101	rpsO	BCI_0628	CDS	248	48551	48551	248	195.77	4434.22
662146	663099	-	317	truB	BCI_0629	CDS	1188	24258	24258	1188	20.4192	705.888
663102	663506	-	134	rbfA	BCI_0630	CDS	1024	11442	11442	1024	11.1738	787.657
663575	666217	-	880	infB	BCI_0631	CDS	3520	103752	103752	3520	29.475	1087.56
666244	667731	-	495	nusA	BCI_0632	CDS	671	43548	43548	671	64.9001	811.528
667937	668013	-	77	Met_tRNA2	BCI_0633	RNA	1	4474	4474	1	4474	535.976
668074	668164	-	91	Leu_tRNA4	BCI_0634	RNA	7	7927	7927	7	1132.43	803.54
668231	668509	-	92	secG	BCI_0635	CDS	842	25222	25222	842	29.9549	2528.9
668611	669948	-	445	glmM	BCI_0636	CDS	670	45547	45547	670	67.9806	944.148
669945	670811	-	288	folP	BCI_0637	CDS	1718	36161	36161	1718	21.0483	1158.21
670920	672803	-	627	ftsH	BCI_0638	CDS	2319	113088	113088	2319	48.7658	1663.75
672862	673491	-	209	rrmJ	BCI_0639	CDS	990	55325	55325	990	55.8838	2441.83
673768	674244	-	158	greA	BCI_0640	CDS	395	54016	54016	395	136.749	3153.59
674447	675874	+	475	dacB	BCI_0641	CDS	19709	32711	19709	32711	0.602519	382.746
675884	676894	-	336	obgE	BCI_0642	CDS	1844	68680	68680	1844	37.2451	1885.52
676946	677200	-	84	rpmA	BCI_0643	CDS	901	23403	23403	901	25.9745	2570
677215	677526	-	103	rplU	BCI_0644	CDS	884	29022	29022	884	32.8303	2599.14
677988	679151	+	387	pgk	BCI_0645	CDS	28270	6219	28270	6219	4.54575	673.837
679230	680306	+	358	fbaA	BCI_0646	CDS	27010	1572	27010	1572	17.1819	695.956
680448	681119	+	223	rpiA	BCI_0647	CDS	20307	3197	20307	3197	6.35189	840.004
681172	681780	-	202	BCI_0648	BCI_0648	CDS	3188	8276	8276	3188	2.59598	377.928
681939	682742	-	267	thiD	BCI_0649	CDS	2750	40157	40157	2750	14.6025	1387.36
682912	684492	-	526	guaA	BCI_0650	CDS	4790	87984	87984	4790	18.3683	1542.97
684542	685999	-	485	guaB	BCI_0651	CDS	483	111515	111515	483	230.88	2120.96

## Sheet: Baum_yellow_rep3
start	end	strand	length	gene	synonym	type	reads_fwd	reads_rev	sense_counts	anti_counts	diff_mag	tpm
197	1720	+	507	mqo	BCI_0001	CDS	8782	1053	8782	1053	8.33998	845.789
1921	2159	-	238	predicted_RNA	pRNA1	RNA	22	3557	3557	22	161.682	729.766
1933	5826	+	1297	purL	BCI_0002	CDS	17304	452	17304	452	38.2832	651.453
5880	6356	+	158	BCI_0003	BCI_0003	CDS	465	536	465	536	0.867537	143.705
6569	7822	+	417	glyA	BCI_0004	CDS	11205	406	11205	406	27.5985	1312.06
7855	8661	-	268	suhB	BCI_0005	CDS	325	6230	6230	325	19.1692	1135.09
8964	10118	+	384	iscS	BCI_0006	CDS	7989	213	7989	213	37.507	1015.87
10151	10585	+	144	ndk	BCI_0007	CDS	3325	57	3325	57	58.3333	1127.47
10933	12054	+	373	ispG	BCI_0008	CDS	84226	90	84226	90	935.844	11025.9
12077	13369	+	430	hisS	BCI_0009	CDS	11327	1058	11327	1058	10.706	1286.24
13440	14615	+	391	yfgl	BCI_0010	CDS	3494	731	3494	731	4.77975	436.338
14634	16052	+	472	engA	BCI_0011	CDS	5431	1573	5431	1573	3.45264	561.842
16150	17811	+	553	pgi	BCI_0012	CDS	11207	504	11207	504	22.2361	989.557
18124	19740	-	538	pckA	BCI_0013	CDS	703	2338	2338	703	3.32575	212.197
20049	20594	+	181	nudE	BCI_0014	CDS	1341	87	1341	87	15.4138	361.765
20778	21935	+	385	metK	BCI_0015	CDS	3481	188	3481	188	18.516	441.489
21979	22887	-	302	metR	BCI_0016	CDS	834	1135	1135	834	1.36091	183.512
22990	25284	+	764	metE	BCI_0017	CDS	76294	343	76294	343	222.431	4876.11
25374	25569	-	195	predicted_RNA	pRNA2	RNA	54	2034	2034	54	37.6667	509.323
25559	27043	+	494	rmuc	BCI_0018	CDS	3016	738	3016	738	4.08672	298.113
27142	28062	-	306	metA	BCI_0019	CDS	426	532	532	426	1.24883	84.892
28316	30781	-	821	plsB	BCI_0020	CDS	2126	5601	5601	2126	2.63452	333.119
30959	31975	-	338	trpS	BCI_0021	CDS	1147	10753	10753	1147	9.37489	1553.42
32055	32750	-	231	rpe	BCI_0022	CDS	617	6892	6892	617	11.1702	1456.83
32844	33923	-	359	aroB	BCI_0023	CDS	207	5814	5814	207	28.087	790.783
33928	34449	-	173	aroK	BCI_0024	CDS	47	3714	3714	47	79.0213	1048.27
34736	36097	-	453	pssA	BCI_0025	CDS	854	1361	1361	854	1.59368	146.702
36278	36928	-	216	dedA	BCI_0026	CDS	2736	1186	1186	2736	0.43348	268.107
37462	37825	-	363	Rnase P	pRNA3	RNA	150	263120	263120	150	1754.13	35393.5
38198	38455	+	85	bolA	BCI_0027	CDS	1495	62	1495	62	24.1129	858.813
38523	39779	+	418	murA	BCI_0028	CDS	6199	334	6199	334	18.5599	724.139
39828	41210	-	460	degQ	BCI_0029	CDS	416	3346	3346	416	8.04327	355.177
41305	41712	-	135	hyp_1	BCI_0030	CDS	105	993	993	105	9.45714	359.163
41948	42376	+	142	rplM	BCI_0031	CDS	10709	79	10709	79	135.557	3682.45
42396	42794	+	132	rpsI	BCI_0032	CDS	11738	81	11738	81	144.914	4342.07
43254	43748	+	164	hyp_2	BCI_0033	CDS	393	14	393	14	28.0714	117.011
44259	45017	+	253	hyp_3	gene	CDS	624	197	624	197	3.16751	120.432
45160	46740	+	526	purH	BCI_0035	CDS	5500	418	5500	418	13.1579	510.568
46761	48035	+	424	purD	BCI_0036	CDS	9259	875	9259	875	10.5817	1066.29
48145	48624	-	159	hsp	BCI_0037	CDS	125	58617	58617	125	468.936	18001.3
48741	49643	-	300	hyp_4	BCI_0038	CDS	239	53241	53241	239	222.766	8665.66
49666	50199	-	177	nuc	BCI_0039	CDS	132	11530	11530	132	87.3485	3180.77
50301	50585	-	94	hup	BCI_0040	CDS	36	2253	2253	36	62.5833	1170.33
51328	53226	+	633	thiC	BCI_0041	CDS	3128	248	3128	248	12.6129	241.29
53213	53857	+	214	thiE	BCI_0042	CDS	1049	203	1049	203	5.16749	239.353
53850	54623	+	257	thiF	BCI_0043	CDS	2201	353	2201	353	6.23513	418.18
54623	54823	+	66	thiS	BCI_0044	CDS	738	10	738	10	73.8	545.995
54827	55606	+	259	thiG	BCI_0045	CDS	7429	101	7429	101	73.5545	1400.58
55603	56751	+	382	thiH	BCI_0046	CDS	3152	2892	3152	2892	1.0899	402.902
56812	57288	-	158	mreD	BCI_0047	CDS	76	1599	1599	76	21.0395	494.16
57447	58313	-	288	mreC	BCI_0048	CDS	134	11073	11073	134	82.6343	1877.37
58348	59391	-	347	mreB	BCI_0049	CDS	62	6208	6208	62	100.129	873.572
59747	60250	+	167	aroQ	BCI_0050	CDS	1840	77	1840	77	23.8961	537.995
60272	60724	+	150	accB	BCI_0051	CDS	1699	15	1699	15	113.267	553.068
60733	62082	+	449	accC	BCI_0052	CDS	4884	144	4884	144	33.9167	531.136
62339	62974	-	211	marC	BCI_0053	CDS	1151	960	960	1151	0.834057	222.16
63371	65458	+	695	prlC	BCI_0054	CDS	3892	1088	3892	1088	3.57721	273.442
65455	67029	-	524	pitA	BCI_0055	CDS	309	2047	2047	309	6.6246	190.749
67592	68656	+	354	ftsY	BCI_0056	CDS	3157	128	3157	128	24.6641	435.46
68669	69310	+	213	ftsE	BCI_0057	CDS	3174	143	3174	143	22.1958	727.619
69330	70280	+	316	ftsX	BCI_0058	CDS	7375	614	7375	614	12.0114	1139.6
70343	71203	+	286	rpoH	BCI_0059	CDS	6576	49	6576	49	134.204	1122.72
71376	72095	+	239	fre	BCI_0060	CDS	4553	169	4553	169	26.9408	930.2
72230	73165	+	311	hemC	BCI_0061	CDS	4843	40	4843	40	121.075	760.38
73173	73913	+	246	hemD	BCI_0062	CDS	3310	239	3310	239	13.8494	657.006
73928	75448	-	506	lnt	BCI_0063	CDS	2257	2287	2287	2257	1.01329	220.695
75494	75961	-	155	hyp_5	BCI_0064	CDS	39	2191	2191	39	56.1795	690.219
76001	77356	-	451	miaB	BCI_0065	CDS	41	12025	12025	41	293.293	1301.92
77544	79559	-	671	ligA	BCI_0066	CDS	229	3554	3554	229	15.5197	258.626
79623	80432	-	269	zipA	BCI_0067	CDS	98	1056	1056	98	10.7755	191.685
80668	81633	+	321	cysK	BCI_0068	CDS	2423	67	2423	67	36.1642	368.574
81807	82064	+	85	ptsH	BCI_0069	CDS	863	9	863	9	95.8889	495.756
82117	83832	+	571	ptsI	BCI_0070	CDS	4145	781	4145	781	5.3073	354.458
84144	84857	-	237	purC	BCI_0071	CDS	95	1460	1460	95	15.3684	300.802
85387	86463	+	358	purM	BCI_0072	CDS	12369	142	12369	142	87.1056	1687.05
86454	87113	+	219	purN	BCI_0073	CDS	5423	492	5423	492	11.0224	1209.13
87324	89411	+	695	ppk	BCI_0074	CDS	2035	2651	2035	2651	0.767635	142.974
89439	91436	-	665	tktA	BCI_0075	CDS	215	19738	19738	215	91.8047	1449.3
91457	92410	-	317	talB	BCI_0076	CDS	399	11821	11821	399	29.6266	1820.84
92901	93731	+	276	cysT	BCI_0077	CDS	424	115	424	115	3.68696	75.0124
93740	94582	+	280	cysW	BCI_0078	CDS	719	405	719	405	1.77531	125.386
94585	95718	+	377	cysA	BCI_0079	CDS	2911	411	2911	411	7.08273	377.031
95991	96179	+	62	rnfB	BCI_0080	CDS	179	163	179	163	1.09816	140.974
96281	97555	-	424	tyrS	BCI_0081	CDS	996	3234	3234	996	3.24699	372.435
97591	98241	-	216	pdxH	BCI_0082	CDS	42	4717	4717	42	112.31	1066.32
98475	98909	-	144	slyA	BCI_0083	CDS	43	5752	5752	43	133.767	1950.44
99001	99099	-	32	hyp_6	BCI_0084	CDS	12	76	76	12	6.33333	115.969
99313	99969	+	218	rnt	BCI_0085	CDS	3517	2071	3517	2071	1.69821	787.757
100009	100368	-	119	BCI_0086	BCI_0086	CDS	300	2071	2071	300	6.90333	849.786
100574	101197	-	207	ribE	BCI_0087	CDS	59	1619	1619	59	27.4407	381.903
101349	101425	+	77	Val_tRNA2	BCI_0088	RNA	4664	11	4664	11	424	2957.63
101593	101937	+	114	momp	BCI_0089	CDS	135153	484	135153	484	279.242	57889.2
102094	102165	-	72	Gln_tRNA	BCI_0090	RNA	71	738	738	71	10.3944	500.496
102178	102254	-	77	Met_tRNA	BCI_0091	RNA	18	1598	1598	18	88.7778	1013.36
102263	102336	-	74	Gln_tRNA_2	BCI_0092	RNA	2	1200	1200	2	600	791.819
102388	102473	-	86	Leu_tRNA1	BCI_0093	RNA	1	460	460	1	460	261.178
102617	104287	+	556	glnS	BCI_0094	CDS	9973	429	9973	429	23.2471	875.846
104379	104909	-	176	fldA	BCI_0095	CDS	133	3188	3188	133	23.9699	884.468
105072	105818	+	248	hyp_7	BCI_0096	CDS	1631	101	1631	101	16.1485	321.128
106173	107354	+	393	sucC	BCI_0097	CDS	3106	293	3106	293	10.6007	385.909
107342	108226	+	294	sucD	BCI_0098	CDS	3283	121	3283	121	27.1322	545.256
108228	109292	+	355	nc_21	nc_21	RNA	2742	1044	2742	1044	2.62644	377.151
109297	110598	+	434	tolB_gene	tolB_gene	CDS	34	2792	2792	34	82.1176	314.125
109385	109607	-	222	predicted_RNA	pRNA4	RNA	337	2620	2620	337	7.77448	576.268
110638	111273	+	211	pal	BCI_0100	CDS	6255	36	6255	36	173.75	1447.51
111288	111935	+	215	hyp_8a	BCI_0101	CDS	9010	115	9010	115	78.3478	2046.27
111993	113039	+	348	nadA	BCI_0102	CDS	16164	603	16164	603	26.806	2268.02
112996	114456	-	486	tilS	BCI_0103	CDS	953	9661	9661	953	10.1375	970.649
114465	116123	-	552	antiporter	BCI_0104	CDS	259	12803	12803	259	49.4324	1132.53
116503	117357	-	284	ABC_trans	BCI_0105	CDS	173	5473	5473	173	31.6358	940.987
117359	118201	-	280	troB	BCI_0106	CDS	118	16001	16001	118	135.602	2790.39
118286	118783	-	165	ssb	BCI_0107	CDS	275	17300	17300	275	62.9091	5119.63
119426	120775	+	450	gltP_degen	gltP_degen	CDS	5503	373	5503	373	14.7534	597.123
121415	121840	+	141	BCI_0109	BCI_0109	CDS	14697	58	14697	58	253.397	5089.63
122087	122701	+	204	gmk	BCI_0110	CDS	4979	204	4979	204	24.4069	1191.76
122774	122971	+	65	rpoZ	BCI_0111	CDS	853	86	853	86	9.9186	640.785
123268	125367	+	699	recG	BCI_0112	CDS	6687	793	6687	793	8.43253	467.122
125425	126033	+	202	GTP-binding	BCI_0113	CDS	926	591	926	591	1.56684	223.839
126348	127268	-	306	polA	BCI_0114	CDS	474	2164	2164	474	4.5654	345.313
127464	128618	+	384	dnaX	BCI_0115	CDS	5348	499	5348	499	10.7174	680.044
128893	129231	+	112	hyp_8	BCI_0116	CDS	1842	164	1842	164	11.2317	803.06
129409	131304	+	631	htpG	BCI_0117	CDS	8574	291	8574	291	29.4639	663.484
131401	132042	+	213	adk	BCI_0118	CDS	4794	1398	4794	1398	3.42918	1098.99
132045	133118	-	357	purK	BCI_0119	CDS	735	8521	8521	735	11.5932	1165.46
133115	133624	-	169	purE	BCI_0120	CDS	25	5445	5445	25	217.8	1573.21
134028	135416	+	462	cysS	BCI_0121	CDS	5637	400	5637	400	14.0925	595.775
135430	136287	-	285	folD	BCI_0122	CDS	98	13704	13704	98	139.837	2347.9
136485	136562	+	78	Arg_tRNA1	BCI_0123	RNA	144	64	144	64	2.25	90.1456
136685	137890	-	402	cyaA_degen	cyaA_degen	CDS	4109	295	4109	295	13.9288	499.099
137966	138790	+	274	dapF	BCI_0125	CDS	3446	652	3446	652	5.28528	614.103
138903	139619	+	238	BCI_0126	BCI_0126	CDS	3067	1246	3067	1246	2.46148	629.236
139475	139527	-	52	predicted_RNA	pRNA5	RNA	0	93	93	0	93	87.3285
139674	141614	+	646	uvrD	BCI_0127	CDS	10537	1573	10537	1573	6.69866	796.455
142061	143011	+	316	corA	BCI_0128	CDS	9349	466	9349	466	20.0622	1444.62
143038	143133	-	31	hyp_9	BCI_0129	CDS	244	99	99	244	0.405738	155.937
143136	144143	+	335	hyp_10	BCI_0130	CDS	1633	2530	1633	2530	0.645455	238.022
144158	146566	-	802	gyrB	BCI_0131	CDS	202	18949	18949	202	93.8069	1153.69
146724	147836	-	370	dnaN	BCI_0132	CDS	244	10730	10730	244	43.9754	1416.04
148605	148748	+	47	rpmH	BCI_0133	CDS	976	33	976	33	29.5758	1013.98
148760	149107	+	115	rnpA	BCI_0134	CDS	1575	173	1575	173	9.10405	668.743
149083	149340	+	85	hyp_11	BCI_0135	CDS	1460	338	1460	338	4.31953	838.707
149236	149695	-	459	predicted_RNA	pRNA6	RNA	245	590	590	245	2.40816	62.7648
149343	150944	+	533	yidC	BCI_0136	CDS	4128	2354	4128	2354	1.75361	378.172
150941	152314	+	457	trmE	BCI_0137	CDS	2809	2916	2809	2916	0.963306	300.132
152320	154158	-	612	glmS	BCI_0138	CDS	447	16551	16551	447	37.0268	1320.53
154201	155610	-	469	glmU	BCI_0139	CDS	259	10331	10331	259	39.888	1075.59
155664	156086	-	140	atpC	BCI_0140	CDS	14	2635	2635	14	188.214	919.029
156100	157473	-	457	atpD	BCI_0141	CDS	99	15608	15608	99	157.657	1667.66
157519	158382	-	287	atpG	BCI_0142	CDS	40	7814	7814	40	195.35	1329.44
158429	159970	-	513	atpA	BCI_0143	CDS	248	25625	25625	248	103.327	2439.06
159992	160525	-	177	atpH	BCI_0144	CDS	91	5695	5695	91	62.5824	1571.08
160548	161018	-	156	atpF	BCI_0145	CDS	30	4417	4417	30	147.233	1382.55
161047	161289	-	80	atpE	BCI_0146	CDS	19	1519	1519	19	79.9474	927.138
161326	162147	-	273	atpB	BCI_0147	CDS	217	1795	1795	217	8.27189	321.054
162235	164130	-	631	gidA	BCI_0148	CDS	1793	6283	6283	1793	3.50418	486.199
164177	165154	-	325	gcvT	BCI_0149	CDS	196	4234	4234	196	21.602	636.127
165307	167034	+	575	recJ	BCI_0150	CDS	6780	110	6780	110	61.6364	575.756
167153	168076	+	308	prfB_degen	prfB_degen	CDS	1942	200	1942	200	9.71	307.875
168085	169605	+	506	lysS	BCI_0152	CDS	4292	359	4292	359	11.9554	414.177
169659	170483	+	274	murI	BCI_0153	CDS	273	433	273	433	0.630485	48.6506
170754	172301	+	1548	rrsB	BCI_0509	CDS	0	0	0	0	0	0
172415	172487	+	73	Glu_tRNA	BCI_0508	RNA	0	0	0	0	0	0
172572	175473	+	2902	rrlB	BCI_0507	CDS	0	0	0	0	0	0
175506	175623	+	118	rrfB	BCI_0506	CDS	0	0	0	0	0	0
175644	175720	+	77	Asp_tRNA	BCI_0158	RNA	10	0	10	0	10	6.34141
175744	175820	+	77	Trp_tRNA	BCI_0159	RNA	31	2	31	2	15.5	19.6584
175857	177956	-	699	glyS	BCI_0160	CDS	1169	6251	6251	1169	5.34731	436.665
177962	178870	-	302	glyQ	BCI_0161	CDS	141	6525	6525	141	46.2766	1054.99
179601	180509	-	302	metF	BCI_0162	CDS	147	411	411	147	2.79592	66.4525
180690	181853	-	387	metB	BCI_0163	CDS	23	1064	1064	23	46.2609	134.248
181866	182486	+	207	metJ_degen	metJ_degen	CDS	1329	995	1329	995	1.33568	313.495
182488	182766	-	92	rpmE	BCI_0165	CDS	83	2129	2129	83	25.6506	1129.96
182886	185000	+	704	priA	BCI_0166	CDS	5439	2649	5439	2649	2.05323	377.245
184682	184883	-	201	predicted_RNA	pRNA7	RNA	0	1631	1631	0	1631	396.218
185225	185767	+	180	hslV	BCI_0167	CDS	24935	18	24935	18	1385.28	6764.15
185771	187111	+	446	hslU	BCI_0168	CDS	20172	41	20172	41	492	2208.47
187374	188144	+	256	tpiA	BCI_0169	CDS	3081	190	3081	190	16.2158	587.663
188146	189135	-	329	BCI_0170	BCI_0170	CDS	611	2416	2416	611	3.95417	358.573
189206	190168	-	320	pfkA	BCI_0171	CDS	56	4390	4390	56	78.3929	669.871
190415	191230	-	271	cysE	BCI_0172	CDS	89	9310	9310	89	104.607	1677.48
191281	192303	-	340	gpsA	BCI_0173	CDS	68	14086	14086	68	207.147	2022.95
192689	193120	-	143	BCI_0174	BCI_0174	CDS	59	3804	3804	59	64.4746	1298.92
193227	194444	+	405	M23	BCI_0175	CDS	2808	832	2808	832	3.375	338.547
194716	195207	+	163	coaD	BCI_0176	CDS	720	427	720	427	1.68618	215.686
195204	196013	-	269	mutM	BCI_0177	CDS	108	16571	16571	108	153.435	3007.97
196074	196241	-	55	rpmG	BCI_0178	CDS	5	3195	3195	5	639	2836.51
196291	196518	-	75	rpmB	BCI_0179	CDS	6	2708	2708	6	451.333	1763.05
196617	197483	-	288	hyp_12	BCI_0180	CDS	304	6535	6535	304	21.4967	1107.97
197581	198222	+	213	pyrE	BCI_0181	CDS	920	766	920	766	1.20104	210.904
198277	198729	-	150	dut	BCI_0182	CDS	58	5212	5212	58	89.8621	1696.64
198710	199924	-	404	dfp	BCI_0183	CDS	416	3783	3783	416	9.09375	457.227
200132	200208	-	77	Pro_tRNA1	BCI_0184	RNA	2	164	164	2	82	103.999
200299	200387	-	89	Leu_tRNA2	BCI_0185	RNA	0	1145	1145	0	1145	628.191
200410	200485	-	76	His_tRNA	BCI_0186	RNA	0	1231	1231	0	1231	790.899
200503	200580	-	78	Arg_tRNA2	BCI_0187	RNA	0	1898	1898	0	1898	1188.17
200830	202089	-	419	rho	BCI_0188	CDS	82	29776	29776	82	363.122	3470
202183	202509	-	108	trxA	BCI_0189	CDS	279	8120	8120	279	29.1039	3671.21
202633	202971	-	112	hyp_13	BCI_0190	CDS	766	2424	2424	766	3.16449	1056.8
203304	204299	+	331	aroH	BCI_0191	CDS	904	166	904	166	5.44578	133.357
204398	205093	-	231	hyp_14	BCI_0192	CDS	270	881	881	270	3.26296	186.226
205192	206151	+	319	rluD	BCI_0193	CDS	2765	219	2765	219	12.6256	423.234
206158	208878	+	862	clpB	BCI_0194	CDS	25562	734	25562	734	34.8256	1447.99
208875	209222	-	115	rplS	BCI_0195	CDS	327	1788	1788	327	5.46789	759.183
209239	209997	-	252	trmD	BCI_0196	CDS	65	19542	19542	65	300.646	3786.56
210022	210549	-	175	rimM	BCI_0197	CDS	16	13726	13726	16	857.875	3829.86
210539	210805	-	88	rpsP	BCI_0198	CDS	6	6431	6431	6	1071.83	3568.39
210902	212251	-	449	ffh	BCI_0199	CDS	114	5744	5744	114	50.386	624.661
212407	212532	+	41	hyp_15	BCI_0200	CDS	128	14	128	14	9.14286	152.441
212553	214124	-	523	gshA	BCI_0201	CDS	1420	1142	1142	1420	0.804225	106.621
214296	214372	-	77	Arg_tRNA3	BCI_0202	RNA	5	127	127	5	25.4	80.5359
214380	214472	-	93	Ser_tRNA1	BCI_0203	RNA	2	291	291	2	145.5	152.787
214670	214855	-	61	csrA	BCI_0204	CDS	460	555	555	460	1.20652	444.263
215037	217691	-	884	alaS	BCI_0205	CDS	199	16000	16000	199	80.402	883.78
217939	219054	-	350	recA	BCI_0206	CDS	54	8437	8437	54	156.241	1177.05
219478	220260	+	260	BCI_0207	BCI_0207	CDS	1450	790	1450	790	1.83544	272.315
220287	220943	+	218	BCI_0208	BCI_0208	CDS	2161	140	2161	140	15.4357	484.033
221030	223597	+	855	mutS	BCI_0209	CDS	5592	563	5592	563	9.9325	319.358
223856	224332	-	158	ispF	BCI_0210	CDS	393	690	690	393	1.75573	213.24
224342	225067	-	241	ispD	BCI_0211	CDS	16	7669	7669	16	479.312	1553.81
225382	226005	-	207	cysC	BCI_0212	CDS	316	1373	1373	316	4.34494	323.874
226002	227444	-	480	cysN	BCI_0213	CDS	239	7154	7154	239	29.9331	727.753
227457	228365	-	302	cysD	BCI_0214	CDS	422	2529	2529	422	5.99289	408.901
228409	229797	-	462	cysG	BCI_0215	CDS	53	4389	4389	53	82.8113	463.874
229965	230702	-	245	cysH	BCI_0216	CDS	59	1591	1591	59	26.9661	317.089
230716	232416	-	566	cysI	BCI_0217	CDS	86	2601	2601	86	30.2442	224.388
232416	234203	-	595	cysJ	BCI_0218	CDS	613	2165	2165	613	3.53181	177.671
234505	234894	+	129	BCI_0219	BCI_0219	CDS	1901	336	1901	336	5.65774	719.563
234917	235588	-	223	hyp_16	BCI_0220	CDS	933	2163	2163	933	2.31833	473.618
235629	236930	-	433	eno	BCI_0221	CDS	118	9203	9203	118	77.9915	1037.81
236998	238629	-	543	pyrG	BCI_0222	CDS	140	12704	12704	140	90.7429	1142.4
238738	239628	-	297	relA_degen	relA_degen	CDS	1193	1071	1071	1193	0.897737	176.08
239976	240665	+	229	pfs	BCI_0224	CDS	2405	5603	2405	5603	0.429234	512.81
240709	241056	-	115	hesB	BCI_0225	CDS	72	1546	1546	72	21.4722	656.43
241062	242465	-	468	mrcB_degen	mrcB_degen	CDS	639	4971	4971	639	7.77934	518.65
242468	242923	+	151	dksA	BCI_0227	CDS	3236	46	3236	46	70.3478	1046.42
243094	244482	+	463	pcnB	BCI_0228	CDS	4563	802	4563	802	5.68953	481.223
244508	245011	+	167	folK	BCI_0229	CDS	1689	159	1689	159	10.6226	493.844
245068	245865	+	265	panB	BCI_0230	CDS	2872	185	2872	185	15.5243	529.194
245884	246741	+	285	panC	BCI_0231	CDS	1589	468	1589	468	3.3953	272.242
246940	249525	+	861	leuS	BCI_0232	CDS	7312	1661	7312	1661	4.40217	414.677
249742	250779	+	345	holA	BCI_0233	CDS	2762	828	2762	828	3.33575	390.914
250772	251425	+	217	nadD	BCI_0234	CDS	549	2506	549	2506	0.219074	123.535
251137	252035	-	898	predicted_RNA	pRNA8	RNA	49	9836	9836	49	200.735	534.834
251496	253361	+	621	mrdA	BCI_0235	CDS	4440	3456	4440	3456	1.28472	349.115
253375	254466	+	363	mrdB	BCI_0236	CDS	6539	398	6539	398	16.4296	879.592
254594	255277	+	227	lipB	BCI_0237	CDS	8674	123	8674	123	70.5203	1865.82
255313	256197	+	294	lipA	BCI_0238	CDS	5623	54	5623	54	104.13	933.893
256361	257662	+	411	mdtH	BCI_0239	CDS	1162	442	1162	442	2.62896	138.051
257862	258425	+	187	pgsA	BCI_0240	CDS	924	1015	924	1015	0.910345	241.272
258467	258541	+	75	Gly_tRNA2	BCI_0241	RNA	567	3	567	3	189	369.146
258685	258755	+	71	Cys_tRNA	BCI_0242	RNA	522	1	522	1	522	358.995
258769	258854	+	86	Leu_tRNA3	BCI_0243	RNA	582	15	582	15	38.8	330.446
258950	259951	+	333	pgl	BCI_0244	CDS	2303	1730	2303	1730	1.33121	337.696
259963	261264	-	433	bioA	BCI_0245	CDS	637	232	232	637	0.364207	26.1623
261372	262400	+	342	bioB	BCI_0246	CDS	2316	289	2316	289	8.01384	330.666
262397	263575	+	392	bioF	BCI_0247	CDS	4098	977	4098	977	4.19447	510.461
263562	264323	+	253	bioC	BCI_0248	CDS	1781	28	1781	28	63.6071	343.732
264316	264993	+	225	bioD	BCI_0249	CDS	2090	206	2090	206	10.1456	453.566
265418	266218	+	253	BCI_0250	BCI_0250	CDS	2230	256	2230	256	8.71094	430.389
266278	266991	+	237	gpmA	BCI_0251	CDS	3869	139	3869	139	27.8345	797.126
266998	268089	+	363	serC	BCI_0252	CDS	5872	431	5872	431	13.6241	789.871
268184	269470	+	428	aroA	BCI_0253	CDS	5100	433	5100	433	11.7783	581.839
269532	270209	+	225	cmk	BCI_0254	CDS	5749	41	5749	41	140.22	1247.63
270342	272018	+	558	rpsA	BCI_0255	CDS	50804	105	50804	105	483.848	4445.7
272214	272378	+	54	hyp_17	BCI_0256	CDS	1728	172	1728	172	10.0465	1562.52
272440	273111	-	223	dsbA	BCI_0257	CDS	1079	1607	1607	1079	1.48934	351.874
273459	274484	+	341	pyrB	BCI_0258	CDS	2192	2409	2192	2409	0.909921	313.879
274498	274968	+	156	pyrI	BCI_0259	CDS	1733	372	1733	372	4.6586	542.438
275014	275409	+	131	L-PSP	BCI_0260	CDS	2802	887	2802	887	3.15896	1044.42
275505	275774	-	69	cspE	BCI_0261	CDS	24	38684	38684	24	1611.83	27375.3
276002	276718	+	238	exsB	BCI_0262	CDS	9318	129	9318	129	72.2326	1911.71
276746	279100	-	784	lon	BCI_0263	CDS	1405	51104	51104	1405	36.373	3182.84
279309	280574	-	421	clpX	BCI_0264	CDS	355	12117	12117	355	34.1324	1405.37
280711	281328	-	205	clpP	BCI_0265	CDS	173	13826	13826	173	79.9191	3293.21
281550	282860	-	436	tig	BCI_0266	CDS	381	3800	3800	381	9.97375	425.573
283346	284260	+	304	cyoA	BCI_0267	CDS	16070	110	16070	110	146.091	2581.18
284291	286288	+	665	cyoB	BCI_0268	CDS	23636	325	23636	325	72.7262	1735.52
286275	286886	+	203	cyoC	BCI_0269	CDS	3608	86	3608	86	41.9535	867.855
286891	287238	+	116	hypo_1	hypo_1	CDS	1008	111	1008	111	9.08108	424.306
287238	288104	+	288	cyoE	BCI_0270	CDS	2679	568	2679	568	4.71655	454.21
288133	289542	+	469	BCI_0271	BCI_0271	CDS	7077	351	7077	351	20.1624	736.806
289571	290440	+	289	panE	BCI_0272	CDS	1741	1449	1741	1449	1.20152	294.156
290454	290750	-	98	thiI	BCI_0273	CDS	263	1206	1206	263	4.58555	600.894
291134	292048	+	304	ispA	BCI_0274	CDS	3895	217	3895	217	17.9493	625.62
292057	293958	+	623	dxs	BCI_0275	CDS	6766	286	6766	286	23.6573	530.299
294028	295764	+	578	argS	BCI_0276	CDS	6206	984	6206	984	6.30691	524.277
295815	297341	-	508	mviN	BCI_0277	CDS	4907	4484	4484	4907	0.913797	431.001
297338	297778	-	146	acpS	BCI_0278	CDS	78	3018	3018	78	38.6923	1009.35
297778	298509	-	243	pdxJ	BCI_0279	CDS	49	5468	5468	49	111.592	1098.75
298643	299548	-	301	era	BCI_0280	CDS	216	5726	5726	216	26.5093	928.884
299551	300228	-	225	rnc	BCI_0281	CDS	92	3013	3013	92	32.75	653.873
300268	301203	-	311	lepB	BCI_0282	CDS	322	2659	2659	322	8.25776	417.479
301212	303020	-	602	lepA	BCI_0283	CDS	63	24616	24616	63	390.73	1996.63
303208	303283	+	76	Thr_tRNA1	BCI_0284	RNA	154	396	154	396	0.388889	98.9427
303301	306174	-	957	valS	BCI_0285	CDS	1939	11857	11857	1939	6.11501	604.978
306184	306648	-	154	holC	BCI_0286	CDS	191	1570	1570	191	8.2199	497.801
306672	308174	-	500	pepA	BCI_0287	CDS	129	24566	24566	129	190.434	2399.06
308547	309401	+	284	nadE	BCI_0288	CDS	3119	141	3119	141	22.1206	536.258
309469	310314	-	281	hemK	BCI_0289	CDS	241	1882	1882	241	7.80913	327.032
310311	311411	-	366	prfA	BCI_0290	CDS	791	8904	8904	791	11.2566	1187.9
311719	312366	+	215	lolB	BCI_0291	CDS	5571	564	5571	564	9.87766	1265.24
312363	313238	+	291	ispE	BCI_0292	CDS	5344	365	5344	365	14.6411	896.706
313291	314229	+	312	prsA	BCI_0293	CDS	6705	411	6705	411	16.3139	1049.35
314339	314920	+	193	pth	BCI_0294	CDS	2093	728	2093	728	2.875	529.527
314970	316040	+	356	ychF	BCI_0295	CDS	4400	253	4400	253	17.3913	603.503
316118	316906	+	262	fabI	BCI_0296	CDS	5084	38	5084	38	133.789	947.503
317059	318996	+	645	rnb	BCI_0297	CDS	8974	101	8974	101	88.8515	679.365
319003	319752	-	249	pyrF	BCI_0298	CDS	567	1350	1350	567	2.38095	264.735
319787	320101	-	98	hyp_18	BCI_0299	CDS	42	736	736	42	17.5238	366.715
320418	321017	+	199	ribA	BCI_0300	CDS	249	188	249	188	1.32447	61.0974
321060	322034	-	324	cysB	BCI_0301	CDS	231	1552	1552	231	6.71861	233.896
322283	324856	-	857	topA	BCI_0302	CDS	1215	9181	9181	1215	7.55638	523.101
325306	326070	+	254	hyp_19	BCI_0303	CDS	553	425	553	425	1.30118	106.308
326265	326567	+	100	hyp_20	BCI_0304	CDS	342	20	342	20	17.1	166.995
326729	328180	+	483	cls	BCI_0305	CDS	971	221	971	221	4.39367	98.1632
328635	329045	+	136	hns	BCI_0306	CDS	1742	325	1742	325	5.36	625.44
329091	329966	-	291	htpX	BCI_0307	CDS	1489	5456	5456	1489	3.6642	915.499
330171	330659	-	162	ftn	BCI_0308	CDS	156	2693	2693	156	17.2628	811.704
330747	332225	-	492	zwf	BCI_0309	CDS	162	13419	13419	162	82.8333	1331.78
332634	334097	+	483	pykA	BCI_0310	CDS	5515	90	5515	90	61.2778	557.539
334517	335866	+	449	BCI_0311	BCI_0311	CDS	2483	244	2483	244	10.1762	270.027
336040	337047	-	335	ruvB	BCI_0312	CDS	341	3347	3347	341	9.81525	487.851
337056	337646	-	196	ruvA	BCI_0313	CDS	469	1480	1480	469	3.15565	368.708
337688	338209	-	173	ruvC	BCI_0314	CDS	1667	2162	2162	1667	1.29694	610.22
338703	340472	-	589	aspS	BCI_0315	CDS	614	6139	6139	614	9.99837	508.931
340697	341431	-	244	BCI_0316	BCI_0316	CDS	305	6392	6392	305	20.9574	1279.16
341666	341755	+	90	Ser_tRNA2	BCI_0317	RNA	366	74	366	74	4.94595	198.571
341775	343067	-	430	serS	BCI_0318	CDS	1337	3687	3687	1337	2.75767	418.679
343217	343843	-	208	lolA	BCI_0319	CDS	32	1015	1015	32	31.7188	238.275
343945	345972	-	666	ftsK	BCI_0320	CDS	649	2170	2170	649	3.34361	159.097
346139	347098	+	319	trxB	BCI_0321	CDS	3311	629	3311	629	5.26391	506.81
347213	347431	+	72	infA	BCI_0322	CDS	879	52	879	52	16.9038	596.119
347607	348335	+	242	artP	BCI_0323	CDS	4741	362	4741	362	13.0967	956.602
348356	349084	+	242	artI	BCI_0324	CDS	4389	292	4389	292	15.0308	885.578
349081	349776	+	231	artQ	BCI_0325	CDS	2672	326	2672	326	8.19632	564.808
349798	350469	+	223	artM	BCI_0326	CDS	2392	147	2392	147	16.2721	523.761
350805	351116	+	103	rpsJ	BCI_0327	CDS	13394	13	13394	13	1030.31	6349.65
351142	351780	+	212	rplC	BCI_0328	CDS	27313	79	27313	79	345.734	6290.86
351792	352397	+	201	rplD	BCI_0329	CDS	22579	133	22579	133	169.767	5485.11
352394	352696	+	100	rplW	BCI_0330	CDS	11221	271	11221	271	41.4059	5479.09
352716	353534	+	272	rplB	BCI_0331	CDS	43421	518	43421	518	83.8243	7794.84
353556	353834	+	92	rpsS	BCI_0332	CDS	12597	9	12597	9	1399.67	6685.84
353865	354197	+	110	rplV	BCI_0333	CDS	16275	16	16275	16	1017.19	7224.45
354214	354915	+	233	rpsC	BCI_0334	CDS	47113	88	47113	88	535.375	9873.28
354927	355340	+	137	rplP	BCI_0335	CDS	31906	51	31906	51	625.608	11371.8
355337	355528	+	63	rpmC	BCI_0336	CDS	14181	17	14181	17	834.176	10991.1
355521	355790	+	89	rpsQ	BCI_0337	CDS	23532	139	23532	139	169.295	12910.6
355831	356313	+	160	rplN	BCI_0338	CDS	3274	49	3274	49	66.8163	999.16
356325	356639	+	104	rplX	BCI_0339	CDS	3032	8	3032	8	379	1423.55
356663	357208	+	181	rplE	BCI_0340	CDS	5645	13	5645	13	434.231	1522.87
357231	357536	+	101	rpsN	BCI_0341	CDS	4464	9	4464	9	496	2158.14
357569	357967	+	132	rpsH	BCI_0342	CDS	5117	8	5117	8	639.625	1892.86
357982	358515	+	177	rp1F	BCI_0343	CDS	6108	92	6108	92	66.3913	1685.01
358529	358876	+	115	rplR	BCI_0344	CDS	4707	15	4707	15	313.8	1998.59
358888	359391	+	167	rpsE	BCI_0345	CDS	5825	47	5825	47	123.936	1703.16
359395	359577	+	60	rpmD	BCI_0346	CDS	2383	33	2383	33	72.2121	1939.32
359578	360009	+	143	rplO	BCI_0347	CDS	5503	21	5503	21	262.048	1879.06
360025	361359	+	444	secY	BCI_0348	CDS	15715	155	15715	155	101.387	1728.26
361397	361513	+	38	rpmJ	BCI_0349	CDS	1347	9	1347	9	149.667	1730.85
361539	361895	+	118	rpsM	BCI_0350	CDS	6113	21	6113	21	291.095	2529.58
361920	362309	+	129	rpsK	BCI_0351	CDS	5880	16	5880	16	367.5	2225.69
362356	362976	+	206	rpsD	BCI_0352	CDS	8734	167	8734	167	52.2994	2070.25
362997	363980	+	327	rpoA	BCI_0353	CDS	13519	1269	13519	1269	10.6533	2018.71
364044	364430	+	128	rplQ	BCI_0354	CDS	3938	438	3938	438	8.99087	1502.25
364453	364530	-	78	Thr_tRNA2	BCI_0355	RNA	108	286	286	108	2.64815	179.039
364558	364629	-	72	Gly_tRNA	BCI_0356	RNA	10	382	382	10	38.2	259.064
364646	364727	-	82	Tyr_tRNA	BCI_0357	RNA	3	568	568	3	189.333	338.229
364746	364818	-	73	Thr_tRNA	BCI_0358	RNA	4	283	283	4	70.75	189.295
365098	366036	+	312	coaA	BCI_0359	CDS	520	693	520	693	0.750361	81.3814
366098	367033	+	311	prmB	BCI_0360	CDS	2691	106	2691	106	25.3868	422.503
367048	368115	+	355	aroC	BCI_0361	CDS	2658	38	2658	38	69.9474	365.597
368366	369586	+	406	fabB	BCI_0362	CDS	6650	42	6650	42	158.333	799.783
369660	370790	+	376	pdxB	BCI_0363	CDS	8756	277	8756	277	31.6101	1137.09
370798	371601	+	267	truA	BCI_0364	CDS	6366	221	6366	221	28.8054	1164.21
371713	372600	+	295	accD	BCI_0365	CDS	7249	354	7249	354	20.4774	1199.87
372643	373923	+	426	folC	BCI_0366	CDS	3481	892	3481	892	3.90247	398.998
374317	374802	+	161	cvpA	BCI_0367	CDS	1355	29	1355	29	46.7241	410.951
374842	376260	+	472	purF	BCI_0368	CDS	4143	228	4143	228	18.1711	428.597
376380	377834	-	484	nuoN	BCI_0369	CDS	1384	2321	2321	1384	1.67702	234.157
377693	377763	+	70	predicted_RNA	pRNA9	RNA	112	27	112	27	4.14815	78.1262
377859	379382	-	507	nuoM	BCI_0370	CDS	1798	6536	6536	1798	3.63515	629.478
379358	379507	+	149	predicted_RNA	pRNA10	RNA	1057	1531	1057	1531	0.690398	346.39
379432	381297	-	621	nuoL	BCI_0371	CDS	1271	11256	11256	1271	8.85602	885.052
381294	381596	-	100	nuoK	BCI_0372	CDS	65	1901	1901	65	29.2462	928.237
381644	382141	-	165	nuoJ	BCI_0373	CDS	60	7496	7496	60	124.933	2218.31
382165	382707	-	180	nuoI	BCI_0374	CDS	64	6469	6469	64	101.078	1754.85
382731	383696	-	321	nuoH	BCI_0375	CDS	233	5948	5948	233	25.5279	904.779
383705	386434	-	909	nuoG	BCI_0376	CDS	963	24041	24041	963	24.9647	1291.41
386516	387850	-	444	nuoF	BCI_0377	CDS	16	10230	10230	16	639.375	1125.04
387847	388350	-	167	nuoE	BCI_0378	CDS	24	3454	3454	24	143.917	1009.91
388353	390140	-	595	nuoCD	BCI_0379	CDS	529	13432	13432	529	25.3913	1102.3
390249	390923	-	224	nuoB	BCI_0380	CDS	113	12034	12034	113	106.496	2623.24
390987	391373	-	128	nuoA	BCI_0381	CDS	574	5087	5087	574	8.86237	1940.57
391621	392823	+	400	ackA	BCI_0382	CDS	5700	442	5700	442	12.8959	695.811
392877	395012	+	711	pta	BCI_0383	CDS	4518	7981	4518	7981	0.566094	310.28
395031	395297	-	88	BCI_0384	BCI_0384	CDS	201	3154	3154	201	15.6915	1750.07
395299	396429	-	376	nrdB	BCI_0385	CDS	132	12457	12457	132	94.3712	1617.72
396480	398762	-	760	nrdA	BCI_0386	CDS	381	18167	18167	381	47.6824	1167.2
399298	401841	+	847	gyrA	BCI_0387	CDS	59521	572	59521	572	104.058	3431.34
402170	403297	+	375	ddlA	BCI_0388	CDS	12552	331	12552	331	37.9215	1634.4
403289	403362	-	74	Pro_tRNA	BCI_0389	RNA	90	179	179	90	1.98889	118.113
403459	403743	-	94	rplY	BCI_0390	CDS	391	2605	2605	391	6.6624	1353.18
403876	404463	-	195	nlpC	BCI_0391	CDS	393	2071	2071	393	5.26972	518.587
404495	405373	-	292	nfo	BCI_0392	CDS	24	2727	2727	24	113.625	456.015
405526	407004	+	492	lysP	BCI_0393	CDS	4457	212	4457	212	21.0236	442.338
407148	407810	+	220	folE	BCI_0394	CDS	1390	696	1390	696	1.99713	308.51
407840	408421	-	193	dcd	BCI_0395	CDS	138	3443	3443	138	24.9493	871.076
408614	410257	+	547	metG	BCI_0396	CDS	11467	4089	11467	4089	2.80435	1023.62
410283	411689	-	468	gnd	BCI_0397	CDS	1334	6900	6900	1334	5.17241	719.913
411892	412515	-	207	hisI	BCI_0398	CDS	589	3247	3247	589	5.51273	765.929
412509	413285	-	258	hisF	BCI_0399	CDS	15	4385	4385	15	292.333	829.901
413267	414013	-	248	hisA	BCI_0400	CDS	21	5039	5039	21	239.952	992.131
414016	414609	-	197	hisH	BCI_0401	CDS	24	3598	3598	24	149.917	891.808
414606	415676	-	356	hisB	BCI_0402	CDS	66	5659	5659	66	85.7424	776.187
415682	416764	-	360	hisC	BCI_0403	CDS	853	3696	3696	853	4.33294	501.31
416761	418074	-	437	hisD	BCI_0404	CDS	344	2668	2668	344	7.75581	298.113
418078	418977	-	299	hisG	BCI_0405	CDS	408	2447	2447	408	5.99755	399.613
419623	420252	+	209	BCI_0406	BCI_0406	CDS	5717	110	5717	110	51.9727	1335.67
420279	421469	-	396	aspC	BCI_0407	CDS	2295	1646	1646	2295	0.717211	202.96
421550	422953	-	467	asnC	BCI_0408	CDS	92	5196	5196	92	56.4783	543.286
423379	424389	+	336	pyrD	BCI_0409	CDS	18592	261	18592	261	71.2337	2701.86
424522	425043	-	173	fabA	BCI_0410	CDS	190	1318	1318	190	6.93684	372.002
425090	426844	-	584	hyp_21	BCI_0411	CDS	150	4958	4958	150	33.0533	414.544
427111	427428	-	105	hspQ	BCI_0412	CDS	128	5623	5623	128	43.9297	2614.9
427534	428025	-	163	dsvC	BCI_0413	CDS	111	878	878	111	7.90991	263.017
428047	428131	+	85	Ser_tRNA	BCI_0414	RNA	464	4	464	4	116	266.548
428219	429154	-	311	fmt	BCI_0415	CDS	2214	2216	2216	2214	1.0009	347.925
429204	429707	-	167	def	BCI_0416	CDS	136	1044	1044	136	7.67647	305.253
429939	430535	+	198	hyp_22	BCI_0417	CDS	3463	121	3463	121	28.6198	854.012
430619	431383	+	254	aroE	BCI_0418	CDS	1982	207	1982	207	9.57488	381.019
431428	434919	-	1163	BCI_0419	BCI_0419	CDS	1603	8135	8135	1603	5.07486	341.55
434949	436340	-	463	fumC	BCI_0420	CDS	587	3301	3301	587	5.62351	348.13
436947	437022	+	76	Asn_tRNA	BCI_0421	RNA	667	0	667	0	667	428.537
437173	438279	+	368	trmU	BCI_0422	CDS	13737	1223	13737	1223	11.2322	1822.72
438606	439997	+	463	purB	BCI_0423	CDS	7857	1854	7857	1854	4.23786	828.614
440033	441280	-	415	lolE	BCI_0424	CDS	385	3310	3310	385	8.5974	389.454
441277	441987	-	236	lolD	BCI_0425	CDS	213	2171	2171	213	10.1925	449.184
441980	443173	-	397	lolC	BCI_0426	CDS	208	4711	4711	208	22.649	579.428
443281	443814	-	177	BCI_0427	BCI_0427	CDS	108	4031	4031	108	37.3241	1112.03
443829	444194	-	121	BCI_0428	BCI_0428	CDS	22	1886	1886	22	85.7273	761.084
444191	444991	-	266	BCI_0429	BCI_0429	CDS	873	5306	5306	873	6.07789	974.007
445036	446034	-	332	holB	BCI_0430	CDS	724	7008	7008	724	9.67956	1030.7
446037	446675	-	212	tmk	BCI_0431	CDS	438	2441	2441	438	5.57306	562.223
446730	447533	-	267	pabC	BCI_0432	CDS	98	4854	4854	98	49.5306	887.698
447634	447867	-	77	acpP	BCI_0433	CDS	70	14125	14125	70	201.786	8957.24
448023	448757	-	244	fabG	BCI_0434	CDS	170	15528	15528	170	91.3412	3107.44
448741	449703	-	320	fabD	BCI_0435	CDS	623	15089	15089	623	24.2199	2302.43
449723	450676	-	317	fabH	BCI_0436	CDS	13	30795	30795	13	2368.85	4743.48
450723	450824	+	33	hyp_23	BCI_0437	CDS	0	689	0	689	0	0
451081	451251	-	56	rpmF	BCI_0438	CDS	27	772	772	27	28.5926	673.141
451394	452362	-	322	rluC	BCI_0439	CDS	1091	2181	2181	1091	1.99908	330.732
452880	454649	+	589	rne	BCI_0440	CDS	1795	4942	1795	4942	0.363213	148.808
454097	455144	-	1047	predicted_RNA	pRNA11	RNA	38	38028	38028	38	1000.74	1773.51
455005	456099	+	364	pyrC	BCI_0441	CDS	680	316	680	316	2.1519	91.2187
456215	458071	+	618	sppA	BCI_0442	CDS	14081	432	14081	432	32.5949	1112.56
458117	459187	+	356	gapA	BCI_0443	CDS	17061	92	17061	92	185.446	2340.08
459430	460125	+	231	minC	BCI_0444	CDS	18507	141	18507	141	131.255	3912.02
460142	460954	+	270	minD	BCI_0445	CDS	7108	32	7108	32	222.125	1285.46
460958	461239	+	93	minE	BCI_0446	CDS	2961	42	2961	42	70.5	1554.65
461260	461958	-	232	BCI_0447	BCI_0447	CDS	2332	2474	2474	2332	1.06089	520.701
462025	462972	-	315	BCI_0448	BCI_0448	CDS	198	8815	8815	198	44.5202	1366.43
463060	463899	-	279	BCI_0449	BCI_0449	CDS	57	10933	10933	57	191.807	1913.43
463921	464721	-	266	BCI_0450	BCI_0450	CDS	159	13680	13680	159	86.0377	2511.2
464758	465726	-	322	BCI_0451	BCI_0451	CDS	193	14037	14037	193	72.7306	2128.6
466225	467559	+	444	terC	BCI_0452	CDS	3257	234	3257	234	13.9188	358.188
467724	469082	-	452	pabB	BCI_0453	CDS	1591	1787	1787	1591	1.12319	193.047
469204	470178	+	324	BCI_0454	BCI_0454	CDS	1855	356	1855	356	5.21067	279.56
470183	470258	-	76	Ala_tRNA2	BCI_0455	RNA	37	114	114	37	3.08108	73.2433
470279	471679	-	466	gltX	BCI_0456	CDS	1232	4868	4868	1232	3.9513	510.083
471790	471862	+	73	Val_tRNA	BCI_0457	RNA	554	2	554	2	277	370.564
471901	471976	+	76	Lys_tRNA	BCI_0458	RNA	485	46	485	46	10.5435	311.605
472023	473540	-	505	emrB	BCI_0459	CDS	3448	6804	6804	3448	1.97332	657.884
473575	474786	-	403	emrA	BCI_0460	CDS	232	17504	17504	232	75.4483	2120.84
475083	475517	-	144	sufE	BCI_0461	CDS	65	1652	1652	65	25.4154	560.175
475533	476756	-	407	sufS	BCI_0462	CDS	345	12149	12149	345	35.2145	1457.55
476753	478051	-	432	sufD	BCI_0463	CDS	1230	6271	6271	1230	5.09837	708.81
478032	478772	-	246	sufC	BCI_0464	CDS	133	4849	4849	133	36.4586	962.484
478847	480322	-	491	sufB	BCI_0465	CDS	299	16006	16006	299	53.5318	1591.76
480337	480696	-	119	sufA	BCI_0466	CDS	12	3444	3444	12	287	1413.16
480843	483227	-	794	pheT	BCI_0467	CDS	2183	7638	7638	2183	3.49885	469.716
483244	484227	-	327	pheS	BCI_0468	CDS	848	4311	4311	848	5.08373	643.735
484295	484657	-	120	rplT	BCI_0469	CDS	16	4205	4205	16	262.812	1711.04
484685	484882	-	65	rpmI	BCI_0470	CDS	8	3414	3414	8	426.75	2564.64
484928	485443	-	171	infC	BCI_0471	CDS	34	10014	10014	34	294.529	2859.49
485475	487403	-	642	thrS	BCI_0472	CDS	735	10869	10869	735	14.7878	826.668
487653	488375	-	240	dnaQ	BCI_0473	CDS	87	239	239	87	2.74713	48.6254
488425	488886	+	153	rnhA	BCI_0474	CDS	823	181	823	181	4.54696	262.655
488971	489744	+	257	gloB	BCI_0475	CDS	1077	98	1077	98	10.9898	204.625
489766	490602	-	278	hyp_24	BCI_0476	CDS	2770	238	238	2770	0.0859206	41.8031
490684	491706	-	340	mltC	BCI_0477	CDS	832	983	983	832	1.18149	141.173
491812	492045	-	77	hyp_25	BCI_0478	CDS	109	147	147	109	1.34862	93.2187
492130	493287	-	385	BCI_0479	BCI_0479	CDS	606	1474	1474	606	2.43234	186.945
493284	493691	-	408	gene	gene_2	CDS	74	1093	1093	74	14.7703	130.809
493691	494254	-	187	hyp_26	BCI_0481	CDS	94	4337	4337	94	46.1383	1132.46
494302	495255	-	317	gshB	BCI_0482	CDS	129	11006	11006	129	85.3178	1695.3
495314	495937	-	207	sodA	BCI_0483	CDS	234	15193	15193	234	64.9274	3583.85
495970	496542	-	190	yhgI	BCI_0484	CDS	759	6016	6016	759	7.92622	1546.08
496690	497451	+	253	bioH	BCI_0485	CDS	1837	81	1837	81	22.679	354.54
497561	497634	+	74	Ile_tRNA	BCI_0486	RNA	434	0	434	0	434	286.375
497662	497734	+	73	Ala_tRNA	BCI_0487	RNA	761	0	761	0	761	509.024
497784	498227	+	147	BCI_0488	BCI_0488	CDS	2572	198	2572	198	12.9899	854.339
498343	498714	+	123	dsrE	BCI_0489	CDS	1042	266	1042	266	3.91729	413.656
498726	499085	+	119	dsrF	BCI_0490	CDS	1056	438	1056	438	2.41096	433.305
499095	499382	+	95	dsrH	BCI_0491	CDS	754	89	754	89	8.47191	387.547
499440	499814	+	124	rpsL	BCI_0492	CDS	1446	59	1446	59	24.5085	569.407
499873	500343	+	156	rpsG	BCI_0493	CDS	3665	24	3665	24	152.708	1147.17
500448	502565	+	705	fusA	BCI_0494	CDS	16304	92	16304	92	177.217	1129.23
502681	503865	+	394	tuf	BCI_0495	CDS	25060	171	25060	171	146.55	3105.71
503931	504314	+	127	secE	BCI_0496	CDS	5962	58	5962	58	102.793	2292.26
504315	504860	+	181	nusG	BCI_0497	CDS	13629	40	13629	40	340.725	3676.73
504916	505344	+	142	rplK	BCI_0498	CDS	9495	56	9495	56	169.554	3265
505348	506052	+	234	rplA	BCI_0499	CDS	14540	347	14540	347	41.902	3034.07
506232	506732	+	166	rplJ	BCI_0500	CDS	14177	23	14177	23	616.391	4170.16
506768	507133	+	121	rplL	BCI_0501	CDS	10157	10	10157	10	1015.7	4098.8
507307	511329	+	1340	rpoB	BCI_0502	CDS	37146	208	37146	208	178.587	1353.58
511418	515644	+	1408	rpoC	BCI_0503	CDS	57737	227	57737	227	254.348	2002.3
515662	516690	+	342	murB	BCI_0504	CDS	6930	248	6930	248	27.9435	989.427
516692	517540	+	282	birA	BCI_0505	CDS	1454	458	1454	458	3.17467	251.763
517580	517697	-	118	rrfA	BCI_0157	RNA	0	4	4	0	4	1.65522
517730	520631	-	2902	rrlA	BCI_0156	RNA	0	0	0	0	0	0
520716	520788	-	73	Glu_tRNA2	BCI_0155	RNA	0	0	0	0	0	0
520902	522449	-	1548	rrsA	BCI_0154	RNA	0	0	0	0	0	0
522858	524270	-	470	lpdA	BCI_0510	CDS	124	6246	6246	124	50.371	648.904
524329	525618	-	358	aceF	BCI_0511	CDS	240	1631	1631	240	6.79583	222.458
525629	528298	-	889	aceE	BCI_0512	CDS	286	5915	5915	286	20.6818	324.885
528653	529540	+	295	nadC	BCI_0513	CDS	1126	240	1126	240	4.69167	186.377
529591	530202	+	203	coaE	BCI_0514	CDS	440	5	440	5	88	105.836
530326	532893	-	856	secA_degen	secA_degen	CDS	5	1239	1239	5	247.8	70.6763
533136	533657	+	173	hyp_27	BCI_0516	CDS	532	857	532	857	0.62077	150.156
533781	534953	-	390	ftsZ	BCI_0517	CDS	276	4962	4962	276	17.9783	621.253
535265	536737	-	490	murC	BCI_0518	CDS	262	5479	5479	262	20.9122	545.986
536809	537885	-	358	murG	BCI_0519	CDS	33	12219	12219	33	370.273	1666.59
538203	539543	-	446	murD	BCI_0520	CDS	1266	14201	14201	1266	11.2172	1554.75
539545	540627	-	360	mraY	BCI_0521	CDS	558	12989	12989	558	23.2778	1761.77
540621	541982	-	453	murF	BCI_0522	CDS	923	5812	5812	923	6.29686	626.475
541985	543472	-	495	murE	BCI_0523	CDS	451	7333	7333	451	16.2594	723.358
543659	544612	-	317	mraW	BCI_0524	CDS	98	4052	4052	98	41.3469	624.147
544713	545579	-	288	queF	BCI_0525	CDS	1425	2413	2413	1425	1.69333	409.111
545764	546558	-	264	map	BCI_0526	CDS	95	2551	2551	95	26.8526	471.827
546863	547561	+	232	rpsB	BCI_0527	CDS	5211	116	5211	116	44.9224	1096.75
547604	548446	+	280	tsf	BCI_0528	CDS	5948	105	5948	105	56.6476	1037.26
548506	549255	+	249	pyrH	BCI_0529	CDS	5381	39	5381	39	137.974	1055.21
549304	549861	+	185	frr	BCI_0530	CDS	4081	274	4081	274	14.8942	1077.14
550015	551211	+	398	dxr	BCI_0531	CDS	3070	576	3070	576	5.32986	376.645
550898	551238	-	340	predicted_RNA	pRNA12	RNA	13	333	333	13	25.6154	47.8236
551341	552102	+	253	uppS	BCI_0532	CDS	1614	42	1614	42	38.4286	311.501
552112	552966	+	284	cdsA	BCI_0533	CDS	2001	344	2001	344	5.81686	344.037
552986	554365	+	459	cdsA	BCI_0534	CDS	6408	569	6408	569	11.2619	681.689
554370	556751	+	793	ecfE	BCI_0535	CDS	5334	2651	5334	2651	2.01207	328.44
556830	557327	+	165	ompH	BCI_0536	CDS	11713	29	11713	29	403.897	3466.26
557583	558032	+	149	fabZ	BCI_0537	CDS	2095	147	2095	147	14.2517	686.553
558257	561748	+	1163	dnaE	BCI_0538	CDS	16454	745	16454	745	22.0859	690.825
561765	562724	+	319	accA	BCI_0539	CDS	5257	132	5257	132	39.8258	804.681
562746	563936	-	396	metC	BCI_0540	CDS	125	27219	27219	125	217.752	3356.24
564244	564918	+	224	mutH	BCI_0541	CDS	2042	505	2042	505	4.04356	445.127
564708	564858	-	150	predicted_RNA	pRNA13	RNA	0	555	555	0	555	180.667
565076	565555	+	159	nudH	BCI_0542	CDS	1624	164	1624	164	9.90244	498.73
565763	566620	+	285	lgt	BCI_0543	CDS	1988	52	1988	52	38.2308	340.603
566651	567445	+	264	thyA	BCI_0544	CDS	4076	1128	4076	1128	3.61348	753.888
567517	570813	+	1098	recC	BCI_0545	CDS	6892	1526	6892	1526	4.51638	306.492
570857	574408	+	1183	recB	BCI_0546	CDS	7181	6327	7181	6327	1.13498	296.399
573560	574082	-	522	predicted_RNA	pRNA14	RNA	0	729	729	0	729	68.192
574133	574356	-	223	predicted_RNA	pRNA15	RNA	377	1453	1453	377	3.85411	318.154
574456	576315	+	619	recD	BCI_0547	CDS	800	1257	800	1257	0.636436	63.1068
574699	574964	-	265	predicted_RNA	pRNA16	RNA	0	1266	1266	0	1266	233.273
576514	577146	+	210	crp	BCI_0548	CDS	3892	71	3892	71	54.8169	904.961
577230	577820	-	196	pabA	BCI_0549	CDS	338	690	690	338	2.04142	171.897
577980	579392	+	470	dnaB	BCI_0550	CDS	3331	398	3331	398	8.36935	346.062
579471	579543	+	73	Arg_tRNA	BCI_0551	RNA	77	97	77	97	0.793814	51.5044
579809	581704	+	631	dnaK	BCI_0552	CDS	19185	82	19185	82	233.963	1484.6
581803	582921	+	372	dnaJ	BCI_0553	CDS	6372	560	6372	560	11.3786	836.391
582954	583217	-	87	rpsT	BCI_0554	CDS	949	3506	3506	949	3.69442	1967.75
583427	584410	+	327	ribF	BCI_0555	CDS	4775	207	4775	207	23.0676	713.021
584422	587238	+	938	ileS	BCI_0556	CDS	20572	870	20572	870	23.646	1070.9
587238	587741	+	167	lspA	BCI_0557	CDS	5963	120	5963	120	49.6917	1743.51
587770	588711	+	313	ispH	BCI_0558	CDS	19070	30	19070	30	635.667	2974.97
588861	590006	+	381	carA	BCI_0559	CDS	7364	246	7364	246	29.935	943.768
590025	593264	+	1079	carB	BCI_0560	CDS	20365	632	20365	632	32.2231	921.594
593307	593804	+	165	folA	BCI_0561	CDS	405	1209	405	1209	0.334988	119.853
593806	594672	-	288	apaH	BCI_0562	CDS	110	4362	4362	110	39.6545	739.554
594902	595717	-	271	ksgA	BCI_0563	CDS	2718	689	689	2718	0.253495	124.144
595710	596714	-	334	pdxA	BCI_0564	CDS	159	3969	3969	159	24.9623	580.245
596701	598002	-	433	surA	BCI_0565	CDS	255	4464	4464	255	17.5059	503.4
598051	598383	+	110	smpA	BCI_0566	CDS	558	544	558	544	1.02574	247.695
598411	598740	-	109	hyp_28	BCI_0567	CDS	966	1526	1526	966	1.57971	683.604
598916	599401	+	161	smpB	BCI_0568	CDS	11142	25	11142	25	445.68	3379.2
599480	599854	+	375	sRNA	BCI_0569	RNA	734599	637	734599	637	1153.22	95652.3
599882	600625	-	247	cysQ	BCI_0570	CDS	1090	5574	5574	1090	5.11376	1101.91
600646	601098	-	150	rplI	BCI_0571	CDS	27	4980	4980	27	184.444	1621.12
601184	601411	-	75	rpsR	BCI_0572	CDS	24	1849	1849	24	77.0417	1203.79
601415	601768	-	117	priN	BCI_0573	CDS	31	2512	2512	31	81.0323	1048.36
601772	602149	-	125	rpsF	BCI_0574	CDS	34	2209	2209	34	64.9706	862.904
602303	603049	-	248	BCI_0575	BCI_0575	CDS	70	2138	2138	70	30.5429	420.952
603138	605387	-	749	rnr	BCI_0576	CDS	191	6353	6353	191	33.2618	414.165
605490	606788	-	432	purA	BCI_0577	CDS	143	8790	8790	143	61.4685	993.532
606892	607893	-	333	hflC	BCI_0578	CDS	31	8437	8437	31	272.161	1237.14
607900	609060	-	386	hflK	BCI_0579	CDS	51	6847	6847	51	134.255	866.143
609103	610386	-	427	hflX	BCI_0580	CDS	58	5938	5938	58	102.379	679.03
610494	610754	-	86	hfq	BCI_0581	CDS	66	1037	1037	66	15.7121	588.785
610770	611036	+	88	hyp_29	BCI_0582	CDS	16	830	16	830	0.0192771	8.87797
611067	611996	-	309	miaA	BCI_0583	CDS	49	895	895	49	18.2653	141.43
612006	613814	-	602	mutL	BCI_0584	CDS	1016	4531	4531	1016	4.45965	367.514
613891	615108	-	382	BCI_0585	BCI_0585	CDS	602	4021	4021	602	6.6794	513.981
615477	616031	-	184	orn	BCI_0586	CDS	397	20305	20305	397	51.1461	5388.42
616407	617285	+	292	psd	BCI_0587	CDS	1682	1204	1682	1204	1.39701	281.268
617561	618544	-	327	genX	BCI_0588	CDS	542	5786	5786	542	10.6753	863.987
618632	619201	-	189	efp	BCI_0589	CDS	148	2702	2702	148	18.2568	698.072
619235	620254	+	339	yodO	BCI_0590	CDS	1285	2771	1285	2771	0.463732	185.089
620344	621984	-	546	groEL	BCI_0591	CDS	153	161350	161350	153	1054.58	14429.6
622026	622319	-	97	groES	BCI_0592	CDS	43	21862	21862	43	508.419	11005.1
622572	623990	+	472	aspA	BCI_0593	CDS	22265	119	22265	119	187.101	2303.34
624068	624140	+	73	Phe_tRNA	BCI_0594	RNA	383	3	383	3	127.667	256.184
624393	624995	-	200	BCI_0595	BCI_0595	CDS	127	16032	16032	127	126.236	3914.12
625182	626243	+	353	queA	BCI_0596	CDS	7453	2871	7453	2871	2.59596	1030.94
626305	627417	+	370	tgt	BCI_0597	CDS	6324	338	6324	338	18.7101	834.577
627439	627771	+	110	yajC	BCI_0598	CDS	2187	29	2187	29	75.4138	970.806
627805	629643	+	612	secD	BCI_0599	CDS	14605	554	14605	554	26.3628	1165.27
629654	630574	+	306	secF	BCI_0600	CDS	6160	333	6160	333	18.4985	982.96
630832	631986	+	378	ribD	BCI_0601	CDS	10621	1636	10621	1636	6.49205	1371.99
632056	632574	+	172	ribH	BCI_0602	CDS	3307	22	3307	22	150.318	938.82
632601	633020	+	139	nusB	BCI_0603	CDS	3819	39	3819	39	97.9231	1341.56
633102	634079	+	325	thiL	BCI_0604	CDS	5215	182	5215	182	28.6538	783.515
634087	634593	+	168	pgpA	BCI_0605	CDS	4175	112	4175	112	37.2768	1213.46
634648	636423	+	591	OMP85_b	BCI_0606	CDS	14098	891	14098	891	15.8227	1164.79
636420	639368	+	982	hyp_30	BCI_0607	CDS	14648	1267	14648	1267	11.5612	728.355
639384	639917	-	177	ppa	BCI_0608	CDS	636	1318	1318	636	2.07233	363.596
640077	641750	-	557	proS	BCI_0609	CDS	196	7821	7821	196	39.9031	685.62
641839	641924	-	86	Leu_tRNA	BCI_0610	RNA	1	347	347	1	347	197.019
642053	642958	-	301	nadK	BCI_0611	CDS	222	655	655	222	2.95045	106.255
643042	643638	+	198	grpE	BCI_0612	CDS	5491	67	5491	67	81.9552	1354.14
643689	644357	-	222	ung	BCI_0613	CDS	300	1483	1483	300	4.94333	326.186
644411	646060	-	549	nadB	BCI_0614	CDS	2046	1231	1231	2046	0.601662	109.487
644625	645026	+	401	predicted_RNA	pRNA17	RNA	2623	0	2623	0	2623	319.397
646228	646303	-	76	Met_tRNA1	BCI_0615	RNA	1	190	190	1	190	122.072
646370	648208	-	612	rpoD	BCI_0616	CDS	487	28387	28387	487	58.2895	2264.88
648290	650077	-	595	dnaG	BCI_0617	CDS	502	7823	7823	502	15.5837	641.997
650171	650440	-	71	rpsU	BCI_0618	CDS	237	1831	1831	237	7.72574	1259.23
650587	651612	+	341	gcp	BCI_0619	CDS	7345	37	7345	37	198.514	1051.75
651654	652019	+	121	folB	BCI_0620	CDS	1469	9	1469	9	163.222	592.806
652158	652985	+	275	BCI_0621	BCI_0621	CDS	3796	405	3796	405	9.37284	674.016
653051	654289	-	412	cca	BCI_0622	CDS	3159	18155	18155	3159	5.74707	2151.67
655168	655803	+	211	ribB	BCI_0623	CDS	1073	169	1073	169	6.34911	248.31
655968	656717	-	249	plsC	BCI_0624	CDS	360	1892	1892	360	5.25556	371.021
656963	657370	-	135	holD	BCI_0625	CDS	1435	55	55	1435	0.0383275	19.8932
657007	657212	+	205	predicted_RNA	pRNA18	RNA	725	62	725	62	11.6935	172.687
657363	659153	-	591	deaD	BCI_0626	CDS	395	7629	7629	395	19.3139	630.314
659552	661645	-	697	pnp	BCI_0627	CDS	708	31829	31829	708	44.9562	2229.8
661756	662061	-	101	rpsO	BCI_0628	CDS	27	11239	11239	27	416.259	5433.54
662146	663099	-	317	truB	BCI_0629	CDS	183	3002	3002	183	16.4044	462.411
663102	663506	-	134	rbfA	BCI_0630	CDS	219	1706	1706	219	7.78995	621.657
663575	666217	-	880	infB	BCI_0631	CDS	654	17673	17673	654	27.0229	980.628
666244	667731	-	495	nusA	BCI_0632	CDS	117	8175	8175	117	69.8718	806.416
667937	668013	-	77	Met_tRNA2	BCI_0633	RNA	0	1591	1591	0	1591	1008.92
668074	668164	-	91	Leu_tRNA4	BCI_0634	RNA	0	2079	2079	0	2079	1115.55
668231	668509	-	92	secG	BCI_0635	CDS	68	7490	7490	68	110.147	3975.31
668611	669948	-	445	glmM	BCI_0636	CDS	72	6616	6616	72	91.8889	725.959
669945	670811	-	288	folP	BCI_0637	CDS	379	5801	5801	379	15.3061	983.528
670920	672803	-	627	ftsH	BCI_0638	CDS	420	14938	14938	420	35.5667	1163.33
672862	673491	-	209	rrmJ	BCI_0639	CDS	125	5800	5800	125	46.4	1355.06
673768	674244	-	158	greA	BCI_0640	CDS	56	5371	5371	56	95.9107	1659.87
674447	675874	+	475	dacB	BCI_0641	CDS	3628	4364	3628	4364	0.831347	372.95
675884	676894	-	336	obgE	BCI_0642	CDS	234	11470	11470	234	49.0171	1666.87
676946	677200	-	84	rpmA	BCI_0643	CDS	36	4553	4553	36	126.472	2646.64
677215	677526	-	103	rplU	BCI_0644	CDS	51	6167	6167	51	120.922	2923.57
677988	679151	+	387	pgk	BCI_0645	CDS	3425	882	3425	882	3.88322	432.142
679230	680306	+	358	fbaA	BCI_0646	CDS	2978	203	2978	203	14.67	406.18
680448	681119	+	223	rpiA	BCI_0647	CDS	3060	471	3060	471	6.49682	670.028
681172	681780	-	202	BCI_0648	BCI_0648	CDS	308	1426	1426	308	4.62987	344.703
681939	682742	-	267	thiD	BCI_0649	CDS	275	7951	7951	275	28.9127	1454.08
682912	684492	-	526	guaA	BCI_0650	CDS	744	16984	16984	744	22.828	1576.63
684542	685999	-	485	guaB	BCI_0651	CDS	80	23689	23689	80	296.113	2384.96

## Sheet: Baum_red_rep3
start	end	strand	length	gene	synonym	type	reads_fwd	reads_rev	sense_counts	anti_counts	diff_mag	tpm
197	1720	+	507	mqo	BCI_0001	CDS	47130	5993	47130	5993	7.86417	1021.69
1921	2159	-	238	predicted_RNA	pRNA1	RNA	112	13397	13397	112	119.616	618.671
1933	5826	+	1297	purL	BCI_0002	CDS	89619	2522	89619	2522	35.5349	759.433
5880	6356	+	158	BCI_0003	BCI_0003	CDS	2868	2830	2868	2830	1.01343	199.504
6569	7822	+	417	glyA	BCI_0004	CDS	93062	2652	93062	2652	35.0913	2452.82
7855	8661	-	268	suhB	BCI_0005	CDS	3172	22754	22754	3172	7.17339	933.151
8964	10118	+	384	iscS	BCI_0006	CDS	23570	1736	23570	1736	13.5772	674.617
10151	10585	+	144	ndk	BCI_0007	CDS	11322	477	11322	477	23.7358	864.151
10933	12054	+	373	ispG	BCI_0008	CDS	371166	836	371166	836	443.978	10936.8
12077	13369	+	430	hisS	BCI_0009	CDS	45877	4641	45877	4641	9.88515	1172.62
13440	14615	+	391	yfgl	BCI_0010	CDS	20438	6987	20438	6987	2.92515	574.501
14634	16052	+	472	engA	BCI_0011	CDS	32244	7590	32244	7590	4.24822	750.82
16150	17811	+	553	pgi	BCI_0012	CDS	53328	3194	53328	3194	16.6963	1059.89
18124	19740	-	538	pckA	BCI_0013	CDS	4526	29260	29260	4526	6.46487	597.752
20049	20594	+	181	nudE	BCI_0014	CDS	7225	934	7225	934	7.73555	438.721
20778	21935	+	385	metK	BCI_0015	CDS	40150	1147	40150	1147	35.0044	1146.18
21979	22887	-	302	metR	BCI_0016	CDS	5025	6551	6551	5025	1.30368	238.413
22990	25284	+	764	metE	BCI_0017	CDS	344225	2074	344225	2074	165.972	4951.97
25374	25569	-	195	predicted_RNA	pRNA2	RNA	560	7821	7821	560	13.9661	440.815
25559	27043	+	494	rmuc	BCI_0018	CDS	27488	3387	27488	3387	8.11574	611.569
27142	28062	-	306	metA	BCI_0019	CDS	4598	4735	4735	4598	1.0298	170.07
28316	30781	-	821	plsB	BCI_0020	CDS	12274	25479	25479	12274	2.07585	341.089
30959	31975	-	338	trpS	BCI_0021	CDS	7775	45126	45126	7775	5.80399	1467.37
32055	32750	-	231	rpe	BCI_0022	CDS	3348	32974	32974	3348	9.84886	1568.88
32844	33923	-	359	aroB	BCI_0023	CDS	1666	24599	24599	1666	14.7653	753.099
33928	34449	-	173	aroK	BCI_0024	CDS	278	14458	14458	278	52.0072	918.526
34736	36097	-	453	pssA	BCI_0025	CDS	4356	15047	15047	4356	3.45432	365.074
36278	36928	-	216	dedA	BCI_0026	CDS	17053	14427	14427	17053	0.846009	734.094
37462	37825	-	363	Rnase P	pRNA3	RNA	578	1550872	1550872	578	2683.17	46956.8
38198	38455	+	85	bolA	BCI_0027	CDS	10241	388	10241	388	26.3943	1324.2
38523	39779	+	418	murA	BCI_0028	CDS	51170	2119	51170	2119	24.1482	1345.45
39828	41210	-	460	degQ	BCI_0029	CDS	4860	14455	14455	4860	2.97428	345.374
41305	41712	-	135	hyp_1	BCI_0030	CDS	1035	4197	4197	1035	4.05507	341.692
41948	42376	+	142	rplM	BCI_0031	CDS	55236	390	55236	390	141.631	4275.26
42396	42794	+	132	rpsI	BCI_0032	CDS	66113	327	66113	327	202.18	5504.81
43254	43748	+	164	hyp_2	BCI_0033	CDS	1696	194	1696	194	8.74227	113.661
44259	45017	+	253	hyp_3	gene	CDS	57321	1041	57321	1041	55.0634	2490.13
45160	46740	+	526	purH	BCI_0035	CDS	97919	2538	97919	2538	38.5812	2046.02
46761	48035	+	424	purD	BCI_0036	CDS	96699	5298	96699	5298	18.252	2506.6
48145	48624	-	159	hsp	BCI_0037	CDS	766	141908	141908	766	185.258	9809.32
48741	49643	-	300	hyp_4	BCI_0038	CDS	1211	140974	140974	1211	116.411	5164.72
49666	50199	-	177	nuc	BCI_0039	CDS	722	33760	33760	722	46.759	2096.32
50301	50585	-	94	hup	BCI_0040	CDS	265	11551	11551	265	43.5887	1350.58
51328	53226	+	633	thiC	BCI_0041	CDS	234185	1117	234185	1117	209.655	4066.16
53213	53857	+	214	thiE	BCI_0042	CDS	57354	2096	57354	2096	27.3635	2945.64
53850	54623	+	257	thiF	BCI_0043	CDS	68686	1491	68686	1491	46.0671	2937.41
54623	54823	+	66	thiS	BCI_0044	CDS	17983	63	17983	63	285.444	2994.66
54827	55606	+	259	thiG	BCI_0045	CDS	93063	699	93063	699	133.137	3949.18
55603	56751	+	382	thiH	BCI_0046	CDS	38468	15346	38468	15346	2.50671	1106.79
56812	57288	-	158	mreD	BCI_0047	CDS	801	9050	9050	801	11.2984	629.536
57447	58313	-	288	mreC	BCI_0048	CDS	659	61682	61682	659	93.5994	2353.94
58348	59391	-	347	mreB	BCI_0049	CDS	386	34683	34683	386	89.8523	1098.54
59747	60250	+	167	aroQ	BCI_0050	CDS	7558	555	7558	555	13.618	497.416
60272	60724	+	150	accB	BCI_0051	CDS	8581	92	8581	92	93.2717	628.747
60733	62082	+	449	accC	BCI_0052	CDS	30783	1321	30783	1321	23.3028	753.518
62339	62974	-	211	marC	BCI_0053	CDS	6742	5568	5568	6742	0.825868	290.032
63371	65458	+	695	prlC	BCI_0054	CDS	18651	6578	18651	6578	2.83536	294.949
65455	67029	-	524	pitA	BCI_0055	CDS	2141	9342	9342	2141	4.36338	195.947
67592	68656	+	354	ftsY	BCI_0056	CDS	16942	770	16942	770	22.0026	526.006
68669	69310	+	213	ftsE	BCI_0057	CDS	17924	763	17924	763	23.4915	924.878
69330	70280	+	316	ftsX	BCI_0058	CDS	37916	1730	37916	1730	21.9168	1318.76
70343	71203	+	286	rpoH	BCI_0059	CDS	34354	385	34354	385	89.2312	1320.2
71376	72095	+	239	fre	BCI_0060	CDS	24324	1108	24324	1108	21.9531	1118.58
72230	73165	+	311	hemC	BCI_0061	CDS	33512	616	33512	616	54.4026	1184.32
73173	73913	+	246	hemD	BCI_0062	CDS	18242	1770	18242	1770	10.3062	815.017
73928	75448	-	506	lnt	BCI_0063	CDS	14942	11216	11216	14942	0.750636	243.622
75494	75961	-	155	hyp_5	BCI_0064	CDS	305	7845	7845	305	25.7213	556.276
76001	77356	-	451	miaB	BCI_0065	CDS	317	38939	38939	317	122.836	948.937
77544	79559	-	671	ligA	BCI_0066	CDS	1752	22071	22071	1752	12.5976	361.517
79623	80432	-	269	zipA	BCI_0067	CDS	869	5192	5192	869	5.97468	212.135
80668	81633	+	321	cysK	BCI_0068	CDS	85961	233	85961	233	368.931	2943.24
81807	82064	+	85	ptsH	BCI_0069	CDS	6875	99	6875	99	69.4444	888.961
82117	83832	+	571	ptsI	BCI_0070	CDS	30398	3637	30398	3637	8.35799	585.111
84144	84857	-	237	purC	BCI_0071	CDS	771	5950	5950	771	7.71725	275.929
85387	86463	+	358	purM	BCI_0072	CDS	28955	1022	28955	1022	28.3317	888.934
86454	87113	+	219	purN	BCI_0073	CDS	14120	4389	14120	4389	3.21713	708.63
87324	89411	+	695	ppk	BCI_0074	CDS	12897	15932	12897	15932	0.809503	203.954
89439	91436	-	665	tktA	BCI_0075	CDS	1492	98506	98506	1492	66.0228	1628.06
91457	92410	-	317	talB	BCI_0076	CDS	2215	53411	53411	2215	24.1133	1851.83
92901	93731	+	276	cysT	BCI_0077	CDS	17159	696	17159	696	24.6537	683.301
93740	94582	+	280	cysW	BCI_0078	CDS	13946	2005	13946	2005	6.95561	547.42
94585	95718	+	377	cysA	BCI_0079	CDS	22453	2890	22453	2890	7.7692	654.579
95991	96179	+	62	rnfB	BCI_0080	CDS	1286	1637	1286	1637	0.785583	227.97
96281	97555	-	424	tyrS	BCI_0081	CDS	5560	24020	24020	5560	4.32014	622.639
97591	98241	-	216	pdxH	BCI_0082	CDS	277	32277	32277	277	116.523	1642.36
98475	98909	-	144	slyA	BCI_0083	CDS	267	53137	53137	267	199.015	4055.68
99001	99099	-	32	hyp_6	BCI_0084	CDS	45	1170	1170	45	26	401.851
99313	99969	+	218	rnt	BCI_0085	CDS	35207	11404	35207	11404	3.08725	1775.01
100009	100368	-	119	BCI_0086	BCI_0086	CDS	2347	8476	8476	2347	3.61142	782.84
100574	101197	-	207	ribE	BCI_0087	CDS	398	9577	9577	398	24.0628	508.497
101349	101425	+	77	Val_tRNA2	BCI_0088	RNA	3165	35	3165	35	90.4286	451.765
101593	101937	+	114	momp	BCI_0089	CDS	107652	6352	107652	6352	16.9477	10378.8
102094	102165	-	72	Gln_tRNA	BCI_0090	RNA	22	6603	6603	22	300.136	1007.95
102178	102254	-	77	Met_tRNA	BCI_0091	RNA	5	11439	11439	5	2287.8	1632.78
102263	102336	-	74	Gln_tRNA_2	BCI_0092	RNA	3	8439	8439	3	2813	1253.4
102388	102473	-	86	Leu_tRNA1	BCI_0093	RNA	9	3317	3317	9	368.556	423.912
102617	104287	+	556	glnS	BCI_0094	CDS	42422	2295	42422	2295	18.4845	838.582
104379	104909	-	176	fldA	BCI_0095	CDS	906	14535	14535	906	16.043	907.677
105072	105818	+	248	hyp_7	BCI_0096	CDS	6973	1274	6973	1274	5.47331	309.027
106173	107354	+	393	sucC	BCI_0097	CDS	77525	2008	77525	2008	38.6081	2168.1
107342	108226	+	294	sucD	BCI_0098	CDS	48131	571	48131	571	84.2925	1799.31
108228	109292	+	355	nc_21	nc_21	RNA	24554	5438	24554	5438	4.51526	760.192
109297	110598	+	434	tolB_gene	tolB_gene	CDS	537	7067	7067	537	13.1601	178.968
109385	109607	-	222	predicted_RNA	pRNA4	RNA	1854	5747	5747	1854	3.09978	284.523
110638	111273	+	211	pal	BCI_0100	CDS	20946	234	20946	234	89.5128	1091.06
111288	111935	+	215	hyp_8a	BCI_0101	CDS	30247	657	30247	657	46.0381	1546.23
111993	113039	+	348	nadA	BCI_0102	CDS	89540	6675	89540	6675	13.4142	2827.92
112996	114456	-	486	tilS	BCI_0103	CDS	6817	61046	61046	6817	8.95497	1380.54
114465	116123	-	552	antiporter	BCI_0104	CDS	2246	76607	76607	2246	34.1082	1525.31
116503	117357	-	284	ABC_trans	BCI_0105	CDS	1094	43611	43611	1094	39.8638	1687.74
117359	118201	-	280	troB	BCI_0106	CDS	1276	130177	130177	1276	102.02	5109.82
118286	118783	-	165	ssb	BCI_0107	CDS	795	51602	51602	795	64.9082	3437.25
119426	120775	+	450	gltP_degen	gltP_degen	CDS	21717	2972	21717	2972	7.3072	530.416
121415	121840	+	141	BCI_0109	BCI_0109	CDS	12234	347	12234	347	35.2565	953.627
122087	122701	+	204	gmk	BCI_0110	CDS	32989	1131	32989	1131	29.168	1777.33
122774	122971	+	65	rpoZ	BCI_0111	CDS	5815	339	5815	339	17.1534	983.253
123268	125367	+	699	recG	BCI_0112	CDS	42827	6103	42827	6103	7.01737	673.395
125425	126033	+	202	GTP-binding	BCI_0113	CDS	7320	2901	7320	2901	2.52327	398.28
126348	127268	-	306	polA	BCI_0114	CDS	2559	14151	14151	2559	5.52989	508.27
127464	128618	+	384	dnaX	BCI_0115	CDS	22424	3698	22424	3698	6.06382	641.817
128893	129231	+	112	hyp_8	BCI_0116	CDS	8935	837	8935	837	10.675	876.81
129409	131304	+	631	htpG	BCI_0117	CDS	33945	2367	33945	2367	14.3409	591.256
131401	132042	+	213	adk	BCI_0118	CDS	18185	5158	18185	5158	3.52559	938.346
132045	133118	-	357	purK	BCI_0119	CDS	5519	37785	37785	5519	6.84635	1163.27
133115	133624	-	169	purE	BCI_0120	CDS	170	24967	24967	170	146.865	1623.71
134028	135416	+	462	cysS	BCI_0121	CDS	18590	2382	18590	2382	7.80437	442.249
135430	136287	-	285	folD	BCI_0122	CDS	624	31214	31214	624	50.0224	1203.74
136485	136562	+	78	Arg_tRNA1	BCI_0123	RNA	1020	149	1020	149	6.84564	143.726
136685	137890	-	402	cyaA_degen	cyaA_degen	CDS	25266	1624	25266	1624	15.5579	690.78
137966	138790	+	274	dapF	BCI_0125	CDS	19346	4865	19346	4865	3.97657	776.014
138903	139619	+	238	BCI_0126	BCI_0126	CDS	14534	9989	14534	9989	1.455	671.177
139475	139527	-	52	predicted_RNA	pRNA5	RNA	0	832	832	0	832	175.853
139674	141614	+	646	uvrD	BCI_0127	CDS	43973	10102	43973	10102	4.3529	748.14
142061	143011	+	316	corA	BCI_0128	CDS	41742	6193	41742	6193	6.74019	1451.83
143038	143133	-	31	hyp_9	BCI_0129	CDS	1002	1175	1175	1002	1.17265	416.587
143136	144143	+	335	hyp_10	BCI_0130	CDS	9488	17744	9488	17744	0.534716	311.286
144158	146566	-	802	gyrB	BCI_0131	CDS	1511	91546	91546	1511	60.5864	1254.57
146724	147836	-	370	dnaN	BCI_0132	CDS	1054	40752	40752	1054	38.6641	1210.53
148605	148748	+	47	rpmH	BCI_0133	CDS	3028	476	3028	476	6.36134	708.088
148760	149107	+	115	rnpA	BCI_0134	CDS	6347	2516	6347	2516	2.52266	606.596
149083	149340	+	85	hyp_11	BCI_0135	CDS	5869	4748	5869	4748	1.2361	758.882
149236	149695	-	459	predicted_RNA	pRNA6	RNA	1998	7230	7230	1998	3.61862	173.123
149343	150944	+	533	yidC	BCI_0136	CDS	22989	22329	22989	22329	1.02956	474.048
150941	152314	+	457	trmE	BCI_0137	CDS	19060	16309	19060	16309	1.16868	458.391
152320	154158	-	612	glmS	BCI_0138	CDS	3328	58324	58324	3328	17.5252	1047.43
154201	155610	-	469	glmU	BCI_0139	CDS	1587	38142	38142	1587	24.034	893.84
155664	156086	-	140	atpC	BCI_0140	CDS	104	11243	11243	104	108.106	882.639
156100	157473	-	457	atpD	BCI_0141	CDS	412	61396	61396	412	149.019	1476.57
157519	158382	-	287	atpG	BCI_0142	CDS	285	28789	28789	285	101.014	1102.49
158429	159970	-	513	atpA	BCI_0143	CDS	1522	89236	89236	1522	58.6307	1911.84
159992	160525	-	177	atpH	BCI_0144	CDS	377	18321	18321	377	48.5968	1137.64
160548	161018	-	156	atpF	BCI_0145	CDS	147	17069	17069	147	116.116	1202.58
161047	161289	-	80	atpE	BCI_0146	CDS	92	7457	7457	92	81.0543	1024.48
161326	162147	-	273	atpB	BCI_0147	CDS	520	8586	8586	520	16.5115	345.667
162235	164130	-	631	gidA	BCI_0148	CDS	11143	13336	13336	11143	1.19681	232.287
164177	165154	-	325	gcvT	BCI_0149	CDS	844	5600	5600	844	6.63507	189.38
165307	167034	+	575	recJ	BCI_0150	CDS	28307	663	28307	663	42.6953	541.072
167153	168076	+	308	prfB_degen	prfB_degen	CDS	9972	1028	9972	1028	9.70039	355.845
168085	169605	+	506	lysS	BCI_0152	CDS	19122	2395	19122	2395	7.98413	415.348
169659	170483	+	274	murI	BCI_0153	CDS	1242	3208	1242	3208	0.387157	49.8196
170754	172301	+	1548	rrsB	BCI_0509	CDS	0	0	0	0	0	0
172415	172487	+	73	Glu_tRNA	BCI_0508	RNA	0	0	0	0	0	0
172572	175473	+	2902	rrlB	BCI_0507	CDS	0	0	0	0	0	0
175506	175623	+	118	rrfB	BCI_0506	CDS	5	0	5	0	5	0.465712
175644	175720	+	77	Asp_tRNA	BCI_0158	RNA	35	0	35	0	35	4.99582
175744	175820	+	77	Trp_tRNA	BCI_0159	RNA	142	5	142	5	28.4	20.2687
175857	177956	-	699	glyS	BCI_0160	CDS	9700	33302	33302	9700	3.4332	523.627
177962	178870	-	302	glyQ	BCI_0161	CDS	655	30138	30138	655	46.0122	1096.82
179601	180509	-	302	metF	BCI_0162	CDS	1356	19391	19391	1356	14.3001	705.704
180690	181853	-	387	metB	BCI_0163	CDS	285	30614	30614	285	107.418	869.437
181866	182486	+	207	metJ_degen	metJ_degen	CDS	2439	6501	2439	6501	0.375173	129.5
182488	182766	-	92	rpmE	BCI_0165	CDS	313	11278	11278	313	36.0319	1347.33
182886	185000	+	704	priA	BCI_0166	CDS	21396	12084	21396	12084	1.77061	334.033
184682	184883	-	201	predicted_RNA	pRNA7	RNA	0	9391	9391	0	9391	513.505
185225	185767	+	180	hslV	BCI_0167	CDS	109410	170	109410	170	643.588	6680.57
185771	187111	+	446	hslU	BCI_0168	CDS	104270	226	104270	226	461.372	2569.53
187374	188144	+	256	tpiA	BCI_0169	CDS	21758	2231	21758	2231	9.75258	934.132
188146	189135	-	329	BCI_0170	BCI_0170	CDS	4402	20698	20698	4402	4.70195	691.451
189206	190168	-	320	pfkA	BCI_0171	CDS	557	42547	42547	557	76.386	1461.33
190415	191230	-	271	cysE	BCI_0172	CDS	430	33691	33691	430	78.3512	1366.39
191281	192303	-	340	gpsA	BCI_0173	CDS	641	42138	42138	641	65.7379	1362.15
192689	193120	-	143	BCI_0174	BCI_0174	CDS	218	11433	11433	218	52.445	878.726
193227	194444	+	405	M23	BCI_0175	CDS	16414	4080	16414	4080	4.02304	445.439
194716	195207	+	163	coaD	BCI_0176	CDS	3157	3215	3157	3215	0.98196	212.871
195204	196013	-	269	mutM	BCI_0177	CDS	696	68038	68038	696	97.7557	2779.89
196074	196241	-	55	rpmG	BCI_0178	CDS	37	13665	13665	37	369.324	2730.71
196291	196518	-	75	rpmB	BCI_0179	CDS	33	12975	12975	33	393.182	1901.41
196617	197483	-	288	hyp_12	BCI_0180	CDS	2843	29703	29703	2843	10.4478	1133.54
197581	198222	+	213	pyrE	BCI_0181	CDS	3123	4752	3123	4752	0.657197	161.147
198277	198729	-	150	dut	BCI_0182	CDS	376	19918	19918	376	52.9734	1459.43
198710	199924	-	404	dfp	BCI_0183	CDS	2891	21679	21679	2891	7.49879	589.776
200132	200208	-	77	Pro_tRNA1	BCI_0184	RNA	0	1605	1605	0	1605	229.094
200299	200387	-	89	Leu_tRNA2	BCI_0185	RNA	3	7232	7232	3	2410.67	893.095
200410	200485	-	76	His_tRNA	BCI_0186	RNA	0	7222	7222	0	7222	1044.41
200503	200580	-	78	Arg_tRNA2	BCI_0187	RNA	1	9365	9365	1	9365	1319.6
200830	202089	-	419	rho	BCI_0188	CDS	304	133234	133234	304	438.27	3494.86
202183	202509	-	108	trxA	BCI_0189	CDS	1626	29088	29088	1626	17.8893	2960.19
202633	202971	-	112	hyp_13	BCI_0190	CDS	4603	6877	6877	4603	1.49403	674.854
203304	204299	+	331	aroH	BCI_0191	CDS	11410	1647	11410	1647	6.92775	378.867
204398	205093	-	231	hyp_14	BCI_0192	CDS	2569	3306	3306	2569	1.28688	157.297
205192	206151	+	319	rluD	BCI_0193	CDS	11881	1252	11881	1252	9.48962	409.347
206158	208878	+	862	clpB	BCI_0194	CDS	111908	4153	111908	4153	26.9463	1426.87
208875	209222	-	115	rplS	BCI_0195	CDS	2184	7955	7955	2184	3.6424	760.276
209239	209997	-	252	trmD	BCI_0196	CDS	507	68039	68039	507	134.199	2967.47
210022	210549	-	175	rimM	BCI_0197	CDS	121	43501	43501	121	359.512	2732.06
210539	210805	-	88	rpsP	BCI_0198	CDS	54	20023	20023	54	370.796	2500.78
210902	212251	-	449	ffh	BCI_0199	CDS	815	46292	46292	815	56.8	1133.15
212407	212532	+	41	hyp_15	BCI_0200	CDS	883	146	883	146	6.04795	236.704
212553	214124	-	523	gshA	BCI_0201	CDS	8945	7414	7414	8945	0.828843	155.805
214296	214372	-	77	Arg_tRNA3	BCI_0202	RNA	4	886	886	4	221.5	126.466
214380	214472	-	93	Ser_tRNA1	BCI_0203	RNA	1	1704	1704	1	1704	201.38
214670	214855	-	61	csrA	BCI_0204	CDS	2105	2197	2197	2105	1.04371	395.849
215037	217691	-	884	alaS	BCI_0205	CDS	1573	66121	66121	1573	42.035	822.084
217939	219054	-	350	recA	BCI_0206	CDS	283	34760	34760	283	122.827	1091.54
219478	220260	+	260	BCI_0207	BCI_0207	CDS	16657	4548	16657	4548	3.66249	704.13
220287	220943	+	218	BCI_0208	BCI_0208	CDS	13429	677	13429	677	19.836	677.043
221030	223597	+	855	mutS	BCI_0209	CDS	36397	4689	36397	4689	7.76221	467.874
223856	224332	-	158	ispF	BCI_0210	CDS	5211	5789	5789	5211	1.11092	402.694
224342	225067	-	241	ispD	BCI_0211	CDS	227	46950	46950	227	206.828	2141.15
225382	226005	-	207	cysC	BCI_0212	CDS	1448	23736	23736	1448	16.3923	1260.28
226002	227444	-	480	cysN	BCI_0213	CDS	978	98386	98386	978	100.599	2252.79
227457	228365	-	302	cysD	BCI_0214	CDS	1411	75640	75640	1411	53.6074	2752.79
228409	229797	-	462	cysG	BCI_0215	CDS	251	162000	162000	251	645.418	3853.92
229965	230702	-	245	cysH	BCI_0216	CDS	461	55177	55177	461	119.69	2475.26
230716	232416	-	566	cysI	BCI_0217	CDS	518	150928	150928	518	291.367	2930.78
232416	234203	-	595	cysJ	BCI_0218	CDS	1486	280540	280540	1486	188.789	5182.11
234505	234894	+	129	BCI_0219	BCI_0219	CDS	8558	3423	8558	3423	2.50015	729.141
234917	235588	-	223	hyp_16	BCI_0220	CDS	5344	18357	18357	5344	3.43507	904.745
235629	236930	-	433	eno	BCI_0221	CDS	1292	71589	71589	1292	55.4094	1817.14
236998	238629	-	543	pyrG	BCI_0222	CDS	1412	63998	63998	1412	45.3244	1295.38
238738	239628	-	297	relA_degen	relA_degen	CDS	7376	8841	8841	7376	1.19862	327.17
239976	240665	+	229	pfs	BCI_0224	CDS	13636	13942	13636	13942	0.978052	654.456
240709	241056	-	115	hesB	BCI_0225	CDS	587	7780	7780	587	13.2538	743.551
241062	242465	-	468	mrcB_degen	mrcB_degen	CDS	7036	25029	25029	7036	3.55728	587.796
242468	242923	+	151	dksA	BCI_0227	CDS	16157	389	16157	389	41.5347	1176.02
243094	244482	+	463	pcnB	BCI_0228	CDS	23641	5806	23641	5806	4.07182	561.195
244508	245011	+	167	folK	BCI_0229	CDS	8670	936	8670	936	9.26282	570.6
245068	245865	+	265	panB	BCI_0230	CDS	16486	1442	16486	1442	11.4327	683.752
245884	246741	+	285	panC	BCI_0231	CDS	9829	4032	9829	4032	2.43775	379.047
246940	249525	+	861	leuS	BCI_0232	CDS	38077	11644	38077	11644	3.2701	486.059
249742	250779	+	345	holA	BCI_0233	CDS	12771	5698	12771	5698	2.24131	406.851
250772	251425	+	217	nadD	BCI_0234	CDS	3236	14747	3236	14747	0.219434	163.9
251137	252035	-	898	predicted_RNA	pRNA8	RNA	83	39851	39851	83	480.133	487.744
251496	253361	+	621	mrdA	BCI_0235	CDS	18896	15286	18896	15286	1.23616	334.432
253375	254466	+	363	mrdB	BCI_0236	CDS	27557	2546	27557	2546	10.8236	834.362
254594	255277	+	227	lipB	BCI_0237	CDS	44554	586	44554	586	76.0307	2157.2
255313	256197	+	294	lipA	BCI_0238	CDS	31280	378	31280	378	82.7513	1169.36
256361	257662	+	411	mdtH	BCI_0239	CDS	10262	3915	10262	3915	2.6212	274.422
257862	258425	+	187	pgsA	BCI_0240	CDS	5881	6290	5881	6290	0.934976	345.652
258467	258541	+	75	Gly_tRNA2	BCI_0241	RNA	2961	3	2961	3	987	433.917
258685	258755	+	71	Cys_tRNA	BCI_0242	RNA	2465	1	2465	1	2465	381.582
258769	258854	+	86	Leu_tRNA3	BCI_0243	RNA	2962	86	2962	86	34.4419	378.543
258950	259951	+	333	pgl	BCI_0244	CDS	13903	18039	13903	18039	0.770719	458.874
259963	261264	-	433	bioA	BCI_0245	CDS	5150	32615	32615	5150	6.33301	827.863
261372	262400	+	342	bioB	BCI_0246	CDS	209136	1629	209136	1629	128.383	6720.97
262397	263575	+	392	bioF	BCI_0247	CDS	207386	2781	207386	2781	74.5725	5814.64
263562	264323	+	253	bioC	BCI_0248	CDS	76720	122	76720	122	628.852	3332.86
264316	264993	+	225	bioD	BCI_0249	CDS	39882	1503	39882	1503	26.5349	1948.16
265418	266218	+	253	BCI_0250	BCI_0250	CDS	19622	2993	19622	2993	6.55596	852.417
266278	266991	+	237	gpmA	BCI_0251	CDS	22801	1173	22801	1173	19.4382	1057.39
266998	268089	+	363	serC	BCI_0252	CDS	33575	2909	33575	2909	11.5418	1016.57
268184	269470	+	428	aroA	BCI_0253	CDS	30619	1387	30619	1387	22.0757	786.278
269532	270209	+	225	cmk	BCI_0254	CDS	30800	293	30800	293	105.119	1504.52
270342	272018	+	558	rpsA	BCI_0255	CDS	202691	487	202691	487	416.203	3992.36
272214	272378	+	54	hyp_17	BCI_0256	CDS	6037	1060	6037	1060	5.69528	1228.73
272440	273111	-	223	dsbA	BCI_0257	CDS	5922	7623	7623	5922	1.28723	375.708
273459	274484	+	341	pyrB	BCI_0258	CDS	9808	13417	9808	13417	0.731013	316.122
274498	274968	+	156	pyrI	BCI_0259	CDS	8078	4901	8078	4901	1.64824	569.126
275014	275409	+	131	L-PSP	BCI_0260	CDS	13908	7706	13908	7706	1.80483	1166.87
275505	275774	-	69	cspE	BCI_0261	CDS	239	186539	186539	239	780.498	29713.2
276002	276718	+	238	exsB	BCI_0262	CDS	40938	1569	40938	1569	26.0918	1890.51
276746	279100	-	784	lon	BCI_0263	CDS	8096	199846	199846	8096	24.6845	2801.62
279309	280574	-	421	clpX	BCI_0264	CDS	2245	51533	51533	2245	22.9546	1345.34
280711	281328	-	205	clpP	BCI_0265	CDS	1020	40014	40014	1020	39.2294	2145.3
281550	282860	-	436	tig	BCI_0266	CDS	2547	13746	13746	2547	5.39694	346.513
283346	284260	+	304	cyoA	BCI_0267	CDS	59184	616	59184	616	96.0779	2139.73
284291	286288	+	665	cyoB	BCI_0268	CDS	96075	2822	96075	2822	34.045	1587.88
286275	286886	+	203	cyoC	BCI_0269	CDS	15023	848	15023	848	17.7158	813.373
286891	287238	+	116	hypo_1	hypo_1	CDS	4298	780	4298	780	5.51026	407.228
287238	288104	+	288	cyoE	BCI_0270	CDS	12576	6077	12576	6077	2.06944	479.931
288133	289542	+	469	BCI_0271	BCI_0271	CDS	47230	3843	47230	3843	12.2899	1106.81
289571	290440	+	289	panE	BCI_0272	CDS	13762	8741	13762	8741	1.57442	523.375
290454	290750	-	98	thiI	BCI_0273	CDS	2411	3377	3377	2411	1.40066	378.734
291134	292048	+	304	ispA	BCI_0274	CDS	12338	1144	12338	1144	10.785	446.067
292057	293958	+	623	dxs	BCI_0275	CDS	27820	1784	27820	1784	15.5942	490.793
294028	295764	+	578	argS	BCI_0276	CDS	28301	7694	28301	7694	3.67832	538.15
295815	297341	-	508	mviN	BCI_0277	CDS	30195	26759	26759	30195	0.886206	578.942
297338	297778	-	146	acpS	BCI_0278	CDS	881	17567	17567	881	19.9398	1322.43
297778	298509	-	243	pdxJ	BCI_0279	CDS	355	31145	31145	355	87.7324	1408.68
298643	299548	-	301	era	BCI_0280	CDS	1129	30565	30565	1129	27.0726	1116.06
299551	300228	-	225	rnc	BCI_0281	CDS	554	18906	18906	554	34.1264	923.52
300268	301203	-	311	lepB	BCI_0282	CDS	2058	15122	15122	2058	7.34791	534.414
301212	303020	-	602	lepA	BCI_0283	CDS	1467	163475	163475	1467	111.435	2984.59
303208	303283	+	76	Thr_tRNA1	BCI_0284	RNA	537	1586	537	1586	0.338588	77.6586
303301	306174	-	957	valS	BCI_0285	CDS	9026	62646	62646	9026	6.94062	719.466
306184	306648	-	154	holC	BCI_0286	CDS	1795	8545	8545	1795	4.76045	609.846
306672	308174	-	500	pepA	BCI_0287	CDS	531	157058	157058	531	295.778	3452.38
308547	309401	+	284	nadE	BCI_0288	CDS	17169	1462	17169	1462	11.7435	664.44
309469	310314	-	281	hemK	BCI_0289	CDS	1901	13074	13074	1901	6.87743	511.365
310311	311411	-	366	prfA	BCI_0290	CDS	3530	38741	38741	3530	10.9748	1163.37
311719	312366	+	215	lolB	BCI_0291	CDS	13328	2550	13328	2550	5.22667	681.327
312363	313238	+	291	ispE	BCI_0292	CDS	16967	2381	16967	2381	7.126	640.828
313291	314229	+	312	prsA	BCI_0293	CDS	27590	5505	27590	5505	5.01181	971.91
314339	314920	+	193	pth	BCI_0294	CDS	7837	11282	7837	11282	0.694646	446.295
314970	316040	+	356	ychF	BCI_0295	CDS	20805	1674	20805	1674	12.4283	642.313
316118	316906	+	262	fabI	BCI_0296	CDS	26393	386	26393	386	68.3756	1107.18
317059	318996	+	645	rnb	BCI_0297	CDS	50491	877	50491	877	57.5724	860.366
319003	319752	-	249	pyrF	BCI_0298	CDS	3372	7667	7667	3372	2.27372	338.419
319787	320101	-	98	hyp_18	BCI_0299	CDS	191	3862	3862	191	20.2199	433.127
320418	321017	+	199	ribA	BCI_0300	CDS	2955	1928	2955	1928	1.53268	163.205
321060	322034	-	324	cysB	BCI_0301	CDS	2708	29319	29319	2708	10.8268	994.565
322283	324856	-	857	topA	BCI_0302	CDS	10856	48199	48199	10856	4.43985	618.139
325306	326070	+	254	hyp_19	BCI_0303	CDS	2218	3512	2218	3512	0.631549	95.9747
326265	326567	+	100	hyp_20	BCI_0304	CDS	3391	137	3391	137	24.7518	372.698
326729	328180	+	483	cls	BCI_0305	CDS	9334	1518	9334	1518	6.14888	212.398
328635	329045	+	136	hns	BCI_0306	CDS	7964	2298	7964	2298	3.46562	643.608
329091	329966	-	291	htpX	BCI_0307	CDS	9993	28523	28523	9993	2.8543	1077.29
330171	330659	-	162	ftn	BCI_0308	CDS	1016	17340	17340	1016	17.0669	1176.42
330747	332225	-	492	zwf	BCI_0309	CDS	1159	91611	91611	1159	79.0431	2046.5
332634	334097	+	483	pykA	BCI_0310	CDS	30073	623	30073	623	48.2713	684.319
334517	335866	+	449	BCI_0311	BCI_0311	CDS	15002	2425	15002	2425	6.18639	367.225
336040	337047	-	335	ruvB	BCI_0312	CDS	2206	18425	18425	2206	8.35222	604.494
337056	337646	-	196	ruvA	BCI_0313	CDS	2922	6482	6482	2922	2.21834	363.481
337688	338209	-	173	ruvC	BCI_0314	CDS	11709	11831	11831	11709	1.01042	751.631
338703	340472	-	589	aspS	BCI_0315	CDS	3689	37223	37223	3689	10.0903	694.585
340697	341431	-	244	BCI_0316	BCI_0316	CDS	1668	38725	38725	1668	23.2164	1744.34
341666	341755	+	90	Ser_tRNA2	BCI_0317	RNA	3165	281	3165	281	11.2633	386.51
341775	343067	-	430	serS	BCI_0318	CDS	13983	18657	18657	13983	1.33426	476.873
343217	343843	-	208	lolA	BCI_0319	CDS	138	6465	6465	138	46.8478	341.613
343945	345972	-	666	ftsK	BCI_0320	CDS	3718	12285	12285	3718	3.3042	202.736
346139	347098	+	319	trxB	BCI_0321	CDS	17299	3117	17299	3117	5.54989	596.018
347213	347431	+	72	infA	BCI_0322	CDS	3859	164	3859	164	23.5305	589.076
347607	348335	+	242	artP	BCI_0323	CDS	21854	1331	21854	1331	16.4192	992.532
348356	349084	+	242	artI	BCI_0324	CDS	17166	833	17166	833	20.6074	779.62
349081	349776	+	231	artQ	BCI_0325	CDS	11055	1331	11055	1331	8.30579	525.988
349798	350469	+	223	artM	BCI_0326	CDS	8074	675	8074	675	11.9615	397.936
350805	351116	+	103	rpsJ	BCI_0327	CDS	37668	64	37668	64	588.562	4019.43
351142	351780	+	212	rplC	BCI_0328	CDS	76399	625	76399	625	122.238	3960.78
351792	352397	+	201	rplD	BCI_0329	CDS	62855	1035	62855	1035	60.7295	3436.95
352394	352696	+	100	rplW	BCI_0330	CDS	30275	1720	30275	1720	17.6017	3327.46
352716	353534	+	272	rplB	BCI_0331	CDS	117658	2905	117658	2905	40.5019	4754.25
353556	353834	+	92	rpsS	BCI_0332	CDS	33770	83	33770	83	406.867	4034.34
353865	354197	+	110	rplV	BCI_0333	CDS	42470	140	42470	140	303.357	4243.45
354214	354915	+	233	rpsC	BCI_0334	CDS	128319	433	128319	433	296.349	6052.91
354927	355340	+	137	rplP	BCI_0335	CDS	87566	140	87566	140	625.471	7024.96
355337	355528	+	63	rpmC	BCI_0336	CDS	35197	56	35197	56	628.518	6140.37
355521	355790	+	89	rpsQ	BCI_0337	CDS	61159	339	61159	339	180.41	7552.65
355831	356313	+	160	rplN	BCI_0338	CDS	10601	451	10601	451	23.5055	728.209
356325	356639	+	104	rplX	BCI_0339	CDS	10453	88	10453	88	118.784	1104.68
356663	357208	+	181	rplE	BCI_0340	CDS	19339	179	19339	179	108.039	1174.31
357231	357536	+	101	rpsN	BCI_0341	CDS	16597	35	16597	35	474.2	1806.08
357569	357967	+	132	rpsH	BCI_0342	CDS	18910	105	18910	105	180.095	1574.51
357982	358515	+	177	rp1F	BCI_0343	CDS	24086	514	24086	514	46.8599	1495.62
358529	358876	+	115	rplR	BCI_0344	CDS	19098	107	19098	107	178.486	1825.24
358888	359391	+	167	rpsE	BCI_0345	CDS	24822	324	24822	324	76.6111	1633.61
359395	359577	+	60	rpmD	BCI_0346	CDS	9302	186	9302	186	50.0108	1703.94
359578	360009	+	143	rplO	BCI_0347	CDS	21130	139	21130	139	152.014	1624.02
360025	361359	+	444	secY	BCI_0348	CDS	62090	847	62090	847	73.3058	1536.98
361397	361513	+	38	rpmJ	BCI_0349	CDS	5127	103	5127	103	49.7767	1482.89
361539	361895	+	118	rpsM	BCI_0350	CDS	22794	109	22794	109	209.119	2123.09
361920	362309	+	129	rpsK	BCI_0351	CDS	24233	149	24233	149	162.638	2064.65
362356	362976	+	206	rpsD	BCI_0352	CDS	36083	1245	36083	1245	28.9823	1925.15
362997	363980	+	327	rpoA	BCI_0353	CDS	56656	9002	56656	9002	6.29371	1904.26
364044	364430	+	128	rplQ	BCI_0354	CDS	14787	3170	14787	3170	4.66467	1269.69
364453	364530	-	78	Thr_tRNA2	BCI_0355	RNA	245	1327	1327	245	5.41633	186.984
364558	364629	-	72	Gly_tRNA	BCI_0356	RNA	16	1626	1626	16	101.625	248.209
364646	364727	-	82	Tyr_tRNA	BCI_0357	RNA	3	2495	2495	3	831.667	334.415
364746	364818	-	73	Thr_tRNA	BCI_0358	RNA	21	1405	1405	21	66.9048	211.535
365098	366036	+	312	coaA	BCI_0359	CDS	3068	6765	3068	6765	0.453511	108.076
366098	367033	+	311	prmB	BCI_0360	CDS	14762	977	14762	977	15.1095	521.692
367048	368115	+	355	aroC	BCI_0361	CDS	17051	328	17051	328	51.9848	527.899
368366	369586	+	406	fabB	BCI_0362	CDS	29313	285	29313	285	102.853	793.53
369660	370790	+	376	pdxB	BCI_0363	CDS	59487	1712	59487	1712	34.7471	1738.85
370798	371601	+	267	truA	BCI_0364	CDS	41954	1070	41954	1070	39.2093	1727
371713	372600	+	295	accD	BCI_0365	CDS	13078	3215	13078	3215	4.06781	487.246
372643	373923	+	426	folC	BCI_0366	CDS	10291	5703	10291	5703	1.80449	265.508
374317	374802	+	161	cvpA	BCI_0367	CDS	6191	203	6191	203	30.4975	422.634
374842	376260	+	472	purF	BCI_0368	CDS	19447	1420	19447	1420	13.6951	452.835
376380	377834	-	484	nuoN	BCI_0369	CDS	9774	15390	15390	9774	1.57459	349.48
377693	377763	+	70	predicted_RNA	pRNA9	RNA	436	102	436	102	4.27451	68.457
377859	379382	-	507	nuoM	BCI_0370	CDS	13137	33456	33456	13137	2.5467	725.262
379358	379507	+	149	predicted_RNA	pRNA10	RNA	17844	19086	17844	19086	0.934926	1316.24
379432	381297	-	621	nuoL	BCI_0371	CDS	10808	58954	58954	10808	5.45466	1043.4
381294	381596	-	100	nuoK	BCI_0372	CDS	590	8610	8610	590	14.5932	946.307
381644	382141	-	165	nuoJ	BCI_0373	CDS	1224	21677	21677	1224	17.71	1443.92
382165	382707	-	180	nuoI	BCI_0374	CDS	1248	19417	19417	1248	15.5585	1185.6
382731	383696	-	321	nuoH	BCI_0375	CDS	2546	21429	21429	2546	8.41673	733.713
383705	386434	-	909	nuoG	BCI_0376	CDS	5834	107117	107117	5834	18.3608	1295.16
386516	387850	-	444	nuoF	BCI_0377	CDS	99	44665	44665	99	451.162	1105.64
387847	388350	-	167	nuoE	BCI_0378	CDS	227	14169	14169	227	62.4185	932.506
388353	390140	-	595	nuoCD	BCI_0379	CDS	4168	52861	52861	4168	12.6826	976.444
390249	390923	-	224	nuoB	BCI_0380	CDS	730	37735	37735	730	51.6918	1851.51
390987	391373	-	128	nuoA	BCI_0381	CDS	3239	20963	20963	3239	6.47206	1800
391621	392823	+	400	ackA	BCI_0382	CDS	36895	2377	36895	2377	15.5217	1013.76
392877	395012	+	711	pta	BCI_0383	CDS	26750	22474	26750	22474	1.19026	413.507
395031	395297	-	88	BCI_0384	BCI_0384	CDS	1296	8810	8810	1296	6.79784	1100.33
395299	396429	-	376	nrdB	BCI_0385	CDS	984	35538	35538	984	36.1159	1038.81
396480	398762	-	760	nrdA	BCI_0386	CDS	5336	60028	60028	5336	11.2496	868.099
399298	401841	+	847	gyrA	BCI_0387	CDS	168749	4020	168749	4020	41.9774	2189.71
402170	403297	+	375	ddlA	BCI_0388	CDS	45019	3016	45019	3016	14.9267	1319.45
403289	403362	-	74	Pro_tRNA	BCI_0389	RNA	92	1216	1216	92	13.2174	180.605
403459	403743	-	94	rplY	BCI_0390	CDS	1740	14982	14982	1740	8.61034	1751.75
403876	404463	-	195	nlpC	BCI_0391	CDS	3452	9301	9301	3452	2.69438	524.233
404495	405373	-	292	nfo	BCI_0392	CDS	262	11278	11278	262	43.0458	424.501
405526	407004	+	492	lysP	BCI_0393	CDS	18923	1193	18923	1193	15.8617	422.721
407148	407810	+	220	folE	BCI_0394	CDS	4822	3939	4822	3939	1.22417	240.898
407840	408421	-	193	dcd	BCI_0395	CDS	962	13282	13282	962	13.8067	756.372
408614	410257	+	547	metG	BCI_0396	CDS	37742	43419	37742	43419	0.869251	758.345
410283	411689	-	468	gnd	BCI_0397	CDS	4744	92222	92222	4744	19.4397	2165.8
411892	412515	-	207	hisI	BCI_0398	CDS	2597	50401	50401	2597	19.4074	2676.07
412509	413285	-	258	hisF	BCI_0399	CDS	201	78498	78498	201	390.537	3344.01
413267	414013	-	248	hisA	BCI_0400	CDS	261	90457	90457	261	346.579	4008.85
414016	414609	-	197	hisH	BCI_0401	CDS	243	71403	71403	243	293.84	3983.63
414606	415676	-	356	hisB	BCI_0402	CDS	299	121920	121920	299	407.759	3764.04
415682	416764	-	360	hisC	BCI_0403	CDS	2863	148437	148437	2863	51.8467	4531.78
416761	418074	-	437	hisD	BCI_0404	CDS	1161	166233	166233	1161	143.181	4180.85
418078	418977	-	299	hisG	BCI_0405	CDS	1394	156871	156871	1394	112.533	5766.34
419623	420252	+	209	BCI_0406	BCI_0406	CDS	35641	1679	35641	1679	21.2275	1874.27
420279	421469	-	396	aspC	BCI_0407	CDS	15058	30091	30091	15058	1.99834	835.162
421550	422953	-	467	asnC	BCI_0408	CDS	776	24792	24792	776	31.9485	583.477
423379	424389	+	336	pyrD	BCI_0409	CDS	51877	3708	51877	3708	13.9906	1696.93
424522	425043	-	173	fabA	BCI_0410	CDS	1585	7554	7554	1585	4.76593	479.91
425090	426844	-	584	hyp_21	BCI_0411	CDS	1152	29163	29163	1152	25.3151	548.843
427111	427428	-	105	hspQ	BCI_0412	CDS	687	34501	34501	687	50.2198	3611.37
427534	428025	-	163	dsvC	BCI_0413	CDS	889	8902	8902	889	10.0135	600.246
428047	428131	+	85	Ser_tRNA	BCI_0414	RNA	3099	10	3099	10	309.9	400.711
428219	429154	-	311	fmt	BCI_0415	CDS	14975	13523	13523	14975	0.903038	477.905
429204	429707	-	167	def	BCI_0416	CDS	1116	8132	8132	1116	7.28674	535.192
429939	430535	+	198	hyp_22	BCI_0417	CDS	16896	1784	16896	1784	9.47085	937.881
430619	431383	+	254	aroE	BCI_0418	CDS	8630	1531	8630	1531	5.63684	373.427
431428	434919	-	1163	BCI_0419	BCI_0419	CDS	13637	46785	46785	13637	3.43074	442.136
434949	436340	-	463	fumC	BCI_0420	CDS	5227	20000	20000	5227	3.82629	474.764
436947	437022	+	76	Asn_tRNA	BCI_0421	RNA	3806	3	3806	3	1268.67	550.407
437173	438279	+	368	trmU	BCI_0422	CDS	62639	8895	62639	8895	7.04205	1870.79
438606	439997	+	463	purB	BCI_0423	CDS	94898	7476	94898	7476	12.6937	2252.71
440033	441280	-	415	lolE	BCI_0424	CDS	3376	16150	16150	3376	4.78377	427.714
441277	441987	-	236	lolD	BCI_0425	CDS	1520	10836	10836	1520	7.12895	504.645
441980	443173	-	397	lolC	BCI_0426	CDS	1330	20817	20817	1330	15.6519	576.311
443281	443814	-	177	BCI_0427	BCI_0427	CDS	645	17783	17783	645	27.5705	1104.23
443829	444194	-	121	BCI_0428	BCI_0428	CDS	204	10488	10488	204	51.4118	952.657
444191	444991	-	266	BCI_0429	BCI_0429	CDS	4480	25983	25983	4480	5.79978	1073.59
445036	446034	-	332	holB	BCI_0430	CDS	5322	32820	32820	5322	6.16685	1086.5
446037	446675	-	212	tmk	BCI_0431	CDS	963	17332	17332	963	17.9979	898.549
446730	447533	-	267	pabC	BCI_0432	CDS	803	29896	29896	803	37.2304	1230.64
447634	447867	-	77	acpP	BCI_0433	CDS	371	50628	50628	371	136.464	7226.52
448023	448757	-	244	fabG	BCI_0434	CDS	1260	72871	72871	1260	57.8341	3282.42
448741	449703	-	320	fabD	BCI_0435	CDS	3088	86140	86140	3088	27.8951	2958.58
449723	450676	-	317	fabH	BCI_0436	CDS	221	172285	172285	221	779.57	5973.34
450723	450824	+	33	hyp_23	BCI_0437	CDS	9	4294	9	4294	0.00209595	2.99749
451081	451251	-	56	rpmF	BCI_0438	CDS	123	5314	5314	123	43.2033	1042.95
451394	452362	-	322	rluC	BCI_0439	CDS	8968	11746	11746	8968	1.30977	400.925
452880	454649	+	589	rne	BCI_0440	CDS	11271	32613	11271	32613	0.345598	210.318
454097	455144	-	1047	predicted_RNA	pRNA11	RNA	345	118135	118135	345	342.42	1240.11
455005	456099	+	364	pyrC	BCI_0441	CDS	5846	1880	5846	1880	3.10957	176.517
456215	458071	+	618	sppA	BCI_0442	CDS	52954	3377	52954	3377	15.6808	941.758
458117	459187	+	356	gapA	BCI_0443	CDS	92417	444	92417	444	208.146	2853.19
459430	460125	+	231	minC	BCI_0444	CDS	63723	1029	63723	1029	61.9271	3031.89
460142	460954	+	270	minD	BCI_0445	CDS	36382	401	36382	401	90.7282	1480.99
460958	461239	+	93	minE	BCI_0446	CDS	17581	497	17581	497	35.3742	2077.73
461260	461958	-	232	BCI_0447	BCI_0447	CDS	16782	13127	13127	16782	0.782207	621.88
462025	462972	-	315	BCI_0448	BCI_0448	CDS	2175	40288	40288	2175	18.5232	1405.71
463060	463899	-	279	BCI_0449	BCI_0449	CDS	459	54276	54276	459	118.248	2138.12
463921	464721	-	266	BCI_0450	BCI_0450	CDS	974	58406	58406	974	59.9651	2413.26
464758	465726	-	322	BCI_0451	BCI_0451	CDS	833	50625	50625	833	60.7743	1727.98
466225	467559	+	444	terC	BCI_0452	CDS	12641	2383	12641	2383	5.30466	312.916
467724	469082	-	452	pabB	BCI_0453	CDS	11305	12879	12879	11305	1.13923	313.165
469204	470178	+	324	BCI_0454	BCI_0454	CDS	10865	3435	10865	3435	3.16303	368.565
470183	470258	-	76	Ala_tRNA2	BCI_0455	RNA	14	1199	1199	14	85.6429	173.394
470279	471679	-	466	gltX	BCI_0456	CDS	5836	35517	35517	5836	6.08585	837.683
471790	471862	+	73	Val_tRNA	BCI_0457	RNA	2347	5	2347	5	469.4	353.362
471901	471976	+	76	Lys_tRNA	BCI_0458	RNA	2313	161	2313	161	14.3665	334.496
472023	473540	-	505	emrB	BCI_0459	CDS	18969	35153	35153	18969	1.85318	765.068
473575	474786	-	403	emrA	BCI_0460	CDS	1843	74364	74364	1843	40.3494	2028.09
475083	475517	-	144	sufE	BCI_0461	CDS	451	10634	10634	451	23.5787	811.64
475533	476756	-	407	sufS	BCI_0462	CDS	2845	57398	57398	2845	20.175	1550
476753	478051	-	432	sufD	BCI_0463	CDS	7616	36033	36033	7616	4.73122	916.739
478032	478772	-	246	sufC	BCI_0464	CDS	738	22115	22115	738	29.9661	988.055
478847	480322	-	491	sufB	BCI_0465	CDS	2077	62414	62414	2077	30.0501	1397.11
480337	480696	-	119	sufA	BCI_0466	CDS	80	14307	14307	80	178.838	1321.39
480843	483227	-	794	pheT	BCI_0467	CDS	15985	30124	30124	15985	1.88452	416.986
483244	484227	-	327	pheS	BCI_0468	CDS	7433	17440	17440	7433	2.34629	586.176
484295	484657	-	120	rplT	BCI_0469	CDS	165	16953	16953	165	102.745	1552.72
484685	484882	-	65	rpmI	BCI_0470	CDS	33	13464	13464	33	408	2276.62
484928	485443	-	171	infC	BCI_0471	CDS	257	36886	36886	257	143.525	2370.8
485475	487403	-	642	thrS	BCI_0472	CDS	4525	39456	39456	4525	8.71956	675.472
487653	488375	-	240	dnaQ	BCI_0473	CDS	624	1130	1130	624	1.8109	51.7483
488425	488886	+	153	rnhA	BCI_0474	CDS	1901	1296	1901	1296	1.46682	136.559
488971	489744	+	257	gloB	BCI_0475	CDS	4063	866	4063	866	4.69169	173.757
489766	490602	-	278	hyp_24	BCI_0476	CDS	13862	1917	1917	13862	0.138292	75.789
490684	491706	-	340	mltC	BCI_0477	CDS	6283	6089	6089	6283	0.969123	196.832
491812	492045	-	77	hyp_25	BCI_0478	CDS	599	1197	1197	599	1.99833	170.857
492130	493287	-	385	BCI_0479	BCI_0479	CDS	6541	8261	8261	6541	1.26296	235.831
493284	493691	-	408	gene	gene_2	CDS	733	6021	6021	733	8.21419	162.195
493691	494254	-	187	hyp_26	BCI_0481	CDS	819	20941	20941	819	25.569	1230.79
494302	495255	-	317	gshB	BCI_0482	CDS	829	41339	41339	829	49.8661	1433.28
495314	495937	-	207	sodA	BCI_0483	CDS	1911	52119	52119	1911	27.2732	2767.29
495970	496542	-	190	yhgI	BCI_0484	CDS	4826	19450	19450	4826	4.03025	1125.11
496690	497451	+	253	bioH	BCI_0485	CDS	11119	686	11119	686	16.2085	483.03
497561	497634	+	74	Ile_tRNA	BCI_0486	RNA	2266	5	2266	5	453.2	336.556
497662	497734	+	73	Ala_tRNA	BCI_0487	RNA	3820	4	3820	4	955	575.135
497784	498227	+	147	BCI_0488	BCI_0488	CDS	12378	1698	12378	1698	7.28975	925.47
498343	498714	+	123	dsrE	BCI_0489	CDS	5964	1455	5964	1455	4.09897	532.92
498726	499085	+	119	dsrF	BCI_0490	CDS	7020	2843	7020	2843	2.46922	648.365
499095	499382	+	95	dsrH	BCI_0491	CDS	4178	596	4178	596	7.01007	483.364
499440	499814	+	124	rpsL	BCI_0492	CDS	9455	258	9455	258	36.6473	838.048
499873	500343	+	156	rpsG	BCI_0493	CDS	14014	350	14014	350	40.04	987.34
500448	502565	+	705	fusA	BCI_0494	CDS	67698	833	67698	833	81.2701	1055.4
502681	503865	+	394	tuf	BCI_0495	CDS	149581	884	149581	884	169.209	4172.62
503931	504314	+	127	secE	BCI_0496	CDS	20778	409	20778	409	50.802	1798.16
504315	504860	+	181	nusG	BCI_0497	CDS	50156	142	50156	142	353.211	3045.6
504916	505344	+	142	rplK	BCI_0498	CDS	32432	439	32432	439	73.877	2510.24
505348	506052	+	234	rplA	BCI_0499	CDS	49385	2133	49385	2133	23.1528	2319.57
506232	506732	+	166	rplJ	BCI_0500	CDS	45101	349	45101	349	129.229	2986.12
506768	507133	+	121	rplL	BCI_0501	CDS	29400	106	29400	106	277.358	2670.49
507307	511329	+	1340	rpoB	BCI_0502	CDS	149582	1626	149582	1626	91.9938	1226.88
511418	515644	+	1408	rpoC	BCI_0503	CDS	250538	2447	250538	2447	102.386	1955.69
515662	516690	+	342	murB	BCI_0504	CDS	43015	1836	43015	1836	23.4286	1382.37
516692	517540	+	282	birA	BCI_0505	CDS	8614	3804	8614	3804	2.26446	335.726
517580	517697	-	118	rrfA	BCI_0157	RNA	6	130	130	6	21.6667	12.1085
517730	520631	-	2902	rrlA	BCI_0156	RNA	0	1	1	0	1	0.00378732
520716	520788	-	73	Glu_tRNA2	BCI_0155	RNA	0	0	0	0	0	0
520902	522449	-	1548	rrsA	BCI_0154	RNA	0	0	0	0	0	0
522858	524270	-	470	lpdA	BCI_0510	CDS	1110	25336	25336	1110	22.8252	592.474
524329	525618	-	358	aceF	BCI_0511	CDS	1127	8413	8413	1127	7.46495	258.284
525629	528298	-	889	aceE	BCI_0512	CDS	2358	30907	30907	2358	13.1073	382.106
528653	529540	+	295	nadC	BCI_0513	CDS	5055	1590	5055	1590	3.17925	188.334
529591	530202	+	203	coaE	BCI_0514	CDS	2245	5	2245	5	449	121.548
530326	532893	-	856	secA_degen	secA_degen	CDS	5	5658	5658	5	1131.6	72.6471
533136	533657	+	173	hyp_27	BCI_0516	CDS	1766	2868	1766	2868	0.61576	112.195
533781	534953	-	390	ftsZ	BCI_0517	CDS	1565	25521	25521	1565	16.3073	719.221
535265	536737	-	490	murC	BCI_0518	CDS	1457	29107	29107	1457	19.9774	652.876
536809	537885	-	358	murG	BCI_0519	CDS	241	51114	51114	241	212.091	1569.23
538203	539543	-	446	murD	BCI_0520	CDS	7371	52894	52894	7371	7.17596	1303.47
539545	540627	-	360	mraY	BCI_0521	CDS	3794	52217	52217	3794	13.763	1594.18
540621	541982	-	453	murF	BCI_0522	CDS	5110	29401	29401	5110	5.75362	713.334
541985	543472	-	495	murE	BCI_0523	CDS	3874	36047	36047	3874	9.30485	800.374
543659	544612	-	317	mraW	BCI_0524	CDS	691	22972	22972	691	33.2446	796.469
544713	545579	-	288	queF	BCI_0525	CDS	7414	15299	15299	7414	2.06353	583.848
545764	546558	-	264	map	BCI_0526	CDS	868	11766	11766	868	13.5553	489.84
546863	547561	+	232	rpsB	BCI_0527	CDS	18175	589	18175	589	30.8574	861.025
547604	548446	+	280	tsf	BCI_0528	CDS	22108	603	22108	603	36.6633	867.802
548506	549255	+	249	pyrH	BCI_0529	CDS	23788	242	23788	242	98.2975	1050
549304	549861	+	185	frr	BCI_0530	CDS	18274	1495	18274	1495	12.2234	1085.65
550015	551211	+	398	dxr	BCI_0531	CDS	16366	17098	16366	17098	0.957188	451.948
550898	551238	-	340	predicted_RNA	pRNA12	RNA	40	8522	8522	40	213.05	275.481
551341	552102	+	253	uppS	BCI_0532	CDS	13374	555	13374	555	24.0973	580.992
552112	552966	+	284	cdsA	BCI_0533	CDS	12780	2146	12780	2146	5.95527	494.586
552986	554365	+	459	ecfE	BCI_0534	CDS	31342	4209	31342	4209	7.44642	750.487
554370	556751	+	793	OMP85	BCI_0535	CDS	26039	10990	26039	10990	2.36934	360.894
556830	557327	+	165	ompH	BCI_0536	CDS	46043	124	46043	124	371.315	3066.96
557583	558032	+	149	fabZ	BCI_0537	CDS	8011	1064	8011	1064	7.52914	590.921
558257	561748	+	1163	dnaE	BCI_0538	CDS	75808	5984	75808	5984	12.6684	716.415
561765	562724	+	319	accA	BCI_0539	CDS	27245	776	27245	776	35.1095	938.697
562746	563936	-	396	metC	BCI_0540	CDS	807	64781	64781	807	80.2739	1797.97
564244	564918	+	224	mutH	BCI_0541	CDS	5601	6568	5601	6568	0.852771	274.819
564708	564858	-	150	predicted_RNA	pRNA13	RNA	0	5051	5051	0	5051	370.097
565076	565555	+	159	nudH	BCI_0542	CDS	9244	955	9244	955	9.67958	638.987
565763	566620	+	285	lgt	BCI_0543	CDS	10175	409	10175	409	24.8778	392.391
566651	567445	+	264	thyA	BCI_0544	CDS	19141	6710	19141	6710	2.85261	796.874
567517	570813	+	1098	recC	BCI_0545	CDS	42888	8672	42888	8672	4.94557	429.302
570857	574408	+	1183	recB	BCI_0546	CDS	33515	40429	33515	40429	0.828984	311.375
573560	574082	-	522	predicted_RNA	pRNA14	RNA	0	4275	4275	0	4275	90.0108
574133	574356	-	223	predicted_RNA	pRNA15	RNA	1747	9478	9478	1747	5.4253	467.133
574456	576315	+	619	recD	BCI_0547	CDS	3878	10981	3878	10981	0.353155	68.8567
574699	574964	-	265	predicted_RNA	pRNA16	RNA	0	5115	5115	0	5115	212.143
576514	577146	+	210	crp	BCI_0548	CDS	23763	388	23763	388	61.2448	1243.69
577230	577820	-	196	pabA	BCI_0549	CDS	4790	2915	2915	4790	0.608559	163.46
577980	579392	+	470	dnaB	BCI_0550	CDS	14822	2926	14822	2926	5.06562	346.608
579471	579543	+	73	Arg_tRNA	BCI_0551	RNA	345	515	345	515	0.669903	51.9428
579809	581704	+	631	dnaK	BCI_0552	CDS	92653	500	92653	500	185.306	1613.84
581803	582921	+	372	dnaJ	BCI_0553	CDS	36615	2128	36615	2128	17.2063	1081.8
582954	583217	-	87	rpsT	BCI_0554	CDS	6647	10757	10757	6647	1.61832	1358.94
583427	584410	+	327	ribF	BCI_0555	CDS	22320	1203	22320	1203	18.5536	750.197
584422	587238	+	938	ileS	BCI_0556	CDS	88190	6295	88190	6295	14.0095	1033.35
587238	587741	+	167	lspA	BCI_0557	CDS	22878	820	22878	820	27.9	1505.67
587770	588711	+	313	ispH	BCI_0558	CDS	65090	224	65090	224	290.58	2285.59
588861	590006	+	381	carA	BCI_0559	CDS	26504	1660	26504	1660	15.9663	764.567
590025	593264	+	1079	carB	BCI_0560	CDS	77099	3740	77099	3740	20.6147	785.338
593307	593804	+	165	folA	BCI_0561	CDS	2375	8048	2375	8048	0.295104	158.201
593806	594672	-	288	apaH	BCI_0562	CDS	704	33767	33767	704	47.9645	1288.63
594902	595717	-	271	ksgA	BCI_0563	CDS	19697	4657	4657	19697	0.236432	188.871
595710	596714	-	334	pdxA	BCI_0564	CDS	1430	21901	21901	1430	15.3154	720.687
596701	598002	-	433	surA	BCI_0565	CDS	1959	24474	24474	1959	12.4931	621.221
598051	598383	+	110	smpA	BCI_0566	CDS	3289	2425	3289	2425	1.35629	328.625
598411	598740	-	109	hyp_28	BCI_0567	CDS	4184	7116	7116	4184	1.70076	717.528
598916	599401	+	161	smpB	BCI_0568	CDS	43647	96	43647	96	454.656	2979.6
599480	599854	+	375	sRNA	BCI_0569	RNA	2575918	1841	2575918	1841	1399.2	75497
599882	600625	-	247	cysQ	BCI_0570	CDS	6381	30933	30933	6381	4.84767	1376.43
600646	601098	-	150	rplI	BCI_0571	CDS	390	24749	24749	390	63.459	1813.41
601184	601411	-	75	rpsR	BCI_0572	CDS	132	9406	9406	132	71.2576	1378.39
601415	601768	-	117	priN	BCI_0573	CDS	136	15899	15899	136	116.904	1493.53
601772	602149	-	125	rpsF	BCI_0574	CDS	411	11080	11080	411	26.9586	974.224
602303	603049	-	248	BCI_0575	BCI_0575	CDS	504	15781	15781	504	31.3115	699.378
603138	605387	-	749	rnr	BCI_0576	CDS	1062	58725	58725	1062	55.2966	861.728
605490	606788	-	432	purA	BCI_0577	CDS	827	78147	78147	827	94.4946	1988.19
606892	607893	-	333	hflC	BCI_0578	CDS	909	32469	32469	909	35.7195	1071.65
607900	609060	-	386	hflK	BCI_0579	CDS	402	28848	28848	402	71.7612	821.405
609103	610386	-	427	hflX	BCI_0580	CDS	770	21711	21711	770	28.1961	558.832
610494	610754	-	86	hfq	BCI_0581	CDS	762	2899	2899	762	3.80446	370.492
610770	611036	+	88	hyp_29	BCI_0582	CDS	183	2342	183	2342	0.0781383	22.8559
611067	611996	-	309	miaA	BCI_0583	CDS	362	3948	3948	362	10.9061	140.426
612006	613814	-	602	mutL	BCI_0584	CDS	6043	18742	18742	6043	3.10144	342.175
613891	615108	-	382	BCI_0585	BCI_0585	CDS	2713	15865	15865	2713	5.84777	456.463
615477	616031	-	184	orn	BCI_0586	CDS	2870	46664	46664	2870	16.2592	2787.36
616407	617285	+	292	psd	BCI_0587	CDS	7930	8640	7930	8640	0.917824	298.483
617561	618544	-	327	genX	BCI_0588	CDS	4254	25003	25003	4254	5.87753	840.376
618632	619201	-	189	efp	BCI_0589	CDS	4143	12906	12906	4143	3.11513	750.514
619235	620254	+	339	yodO	BCI_0590	CDS	27391	19342	27391	19342	1.41614	888.05
620344	621984	-	546	groEL	BCI_0591	CDS	540	665394	665394	540	1232.21	13394.2
622026	622319	-	97	groES	BCI_0592	CDS	140	103722	103722	140	740.871	11752.4
622572	623990	+	472	aspA	BCI_0593	CDS	21272	1180	21272	1180	18.0271	495.331
624068	624140	+	73	Phe_tRNA	BCI_0594	RNA	1245	3	1245	3	415	187.446
624393	624995	-	200	BCI_0595	BCI_0595	CDS	671	83555	83555	671	124.523	4591.68
625182	626243	+	353	queA	BCI_0596	CDS	41547	9132	41547	9132	4.54961	1293.58
626305	627417	+	370	tgt	BCI_0597	CDS	31288	1898	31288	1898	16.4847	929.405
627439	627771	+	110	yajC	BCI_0598	CDS	10249	626	10249	626	16.3722	1024.04
627805	629643	+	612	secD	BCI_0599	CDS	70616	5222	70616	5222	13.5228	1268.18
629654	630574	+	306	secF	BCI_0600	CDS	35108	2226	35108	2226	15.7718	1261
630832	631986	+	378	ribD	BCI_0601	CDS	56726	5942	56726	5942	9.54662	1649.38
632056	632574	+	172	ribH	BCI_0602	CDS	17787	190	17787	190	93.6158	1136.59
632601	633020	+	139	nusB	BCI_0603	CDS	20006	536	20006	536	37.3246	1581.88
633102	634079	+	325	thiL	BCI_0604	CDS	28359	2093	28359	2093	13.5495	959.04
634087	634593	+	168	pgpA	BCI_0605	CDS	23115	821	23115	821	28.1547	1512.22
634648	636423	+	591	OMP85_b	BCI_0606	CDS	63835	6775	63835	6775	9.42214	1187.14
636420	639368	+	982	hyp_30	BCI_0607	CDS	80014	7645	80014	7645	10.4662	895.537
639384	639917	-	177	ppa	BCI_0608	CDS	4791	6585	6585	4791	1.37445	408.895
640077	641750	-	557	proS	BCI_0609	CDS	1252	35108	35108	1252	28.0415	692.756
641839	641924	-	86	Leu_tRNA	BCI_0610	RNA	2	1767	1767	2	883.5	225.822
642053	642958	-	301	nadK	BCI_0611	CDS	1270	3079	3079	1270	2.42441	112.427
643042	643638	+	198	grpE	BCI_0612	CDS	26717	1047	26717	1047	25.5177	1483.04
643689	644357	-	222	ung	BCI_0613	CDS	2092	15134	15134	2092	7.23423	749.255
644411	646060	-	549	nadB	BCI_0614	CDS	8037	14574	14574	8037	1.81336	291.767
644625	645026	+	401	predicted_RNA	pRNA17	RNA	8967	0	8967	0	8967	245.772
646228	646303	-	76	Met_tRNA1	BCI_0615	RNA	4	995	995	4	248.75	143.893
646370	648208	-	612	rpoD	BCI_0616	CDS	4639	95485	95485	4639	20.5831	1714.8
648290	650077	-	595	dnaG	BCI_0617	CDS	3004	36194	36194	3004	12.0486	668.573
650171	650440	-	71	rpsU	BCI_0618	CDS	1921	6822	6822	1921	3.55128	1056.05
650587	651612	+	341	gcp	BCI_0619	CDS	32293	182	32293	182	177.434	1040.84
651654	652019	+	121	folB	BCI_0620	CDS	7006	97	7006	97	72.2268	636.376
652158	652985	+	275	BCI_0621	BCI_0621	CDS	18764	2639	18764	2639	7.11027	749.932
653051	654289	-	412	cca	BCI_0622	CDS	23513	44560	44560	23513	1.89512	1188.71
655168	655803	+	211	ribB	BCI_0623	CDS	34467	1400	34467	1400	24.6193	1795.35
655968	656717	-	249	plsC	BCI_0624	CDS	4672	11131	11131	4672	2.38249	491.319
656963	657370	-	135	holD	BCI_0625	CDS	7109	476	476	7109	0.0669574	38.7527
657007	657212	+	205	predicted_RNA	pRNA18	RNA	5605	369	5605	369	15.1897	300.504
657363	659153	-	591	deaD	BCI_0626	CDS	3440	40354	40354	3440	11.7308	750.461
659552	661645	-	697	pnp	BCI_0627	CDS	3707	134291	134291	3707	36.2263	2117.6
661756	662061	-	101	rpsO	BCI_0628	CDS	185	43134	43134	185	233.157	4693.83
662146	663099	-	317	truB	BCI_0629	CDS	963	20044	20044	963	20.8141	694.951
663102	663506	-	134	rbfA	BCI_0630	CDS	966	8985	8985	966	9.30124	736.957
663575	666217	-	880	infB	BCI_0631	CDS	3424	85721	85721	3424	25.0353	1070.62
666244	667731	-	495	nusA	BCI_0632	CDS	646	34923	34923	646	54.0604	775.417
667937	668013	-	77	Met_tRNA2	BCI_0633	RNA	2	4203	4203	2	2101.5	599.926
668074	668164	-	91	Leu_tRNA4	BCI_0634	RNA	6	6618	6618	6	1103	799.309
668231	668509	-	92	secG	BCI_0635	CDS	687	20494	20494	687	29.8311	2448.32
668611	669948	-	445	glmM	BCI_0636	CDS	685	40740	40740	685	59.4745	1006.21
669945	670811	-	288	folP	BCI_0637	CDS	1873	32582	32582	1873	17.3956	1243.41
670920	672803	-	627	ftsH	BCI_0638	CDS	2290	101918	101918	2290	44.5057	1786.54
672862	673491	-	209	rrmJ	BCI_0639	CDS	927	42919	42919	927	46.2988	2257
673768	674244	-	158	greA	BCI_0640	CDS	360	44088	44088	360	122.467	3066.85
674447	675874	+	475	dacB	BCI_0641	CDS	16346	27538	16346	27538	0.59358	378.222
675884	676894	-	336	obgE	BCI_0642	CDS	1607	54711	54711	1607	34.0454	1789.64
676946	677200	-	84	rpmA	BCI_0643	CDS	726	17748	17748	726	24.4463	2322.2
677215	677526	-	103	rplU	BCI_0644	CDS	666	22140	22140	666	33.2432	2362.49
677988	679151	+	387	pgk	BCI_0645	CDS	22731	5215	22731	5215	4.35877	645.56
679230	680306	+	358	fbaA	BCI_0646	CDS	21593	1384	21593	1384	15.6019	662.917
680448	681119	+	223	rpiA	BCI_0647	CDS	18034	3318	18034	3318	5.4352	888.825
681172	681780	-	202	BCI_0648	BCI_0648	CDS	2758	6479	6479	2758	2.34917	352.522
681939	682742	-	267	thiD	BCI_0649	CDS	2678	30913	30913	2678	11.5433	1272.5
682912	684492	-	526	guaA	BCI_0650	CDS	4413	71425	71425	4413	16.1851	1492.43
684542	685999	-	485	guaB	BCI_0651	CDS	467	98361	98361	467	210.623	2229
