# Supplementary material for: Genome-Wide Transcriptional Dynamics in the Companion Bacterial Symbionts of the Glassy-Winged Sharpshooter (Cicadellidae: Homalodisca vitripennis) Reveal Differential Gene Expression in Bacteria Occupying Multiple Host Organs
Source: G3 (Bethesda). 2017 Jul 13;7(9):3073–82. doi: 10.1534/g3.117.044255 (PMC5592932; doi:10.1534/g3.117.044255)
Supplement: Supplementary file 6 [file 3073TableS3.xlsx]

## Sheet: total_fct_1
Table S3: Complete DESeq2 results for each sequencing depth (total vs. 3 mil) and for each log2 fold change thresholds (FCT).
gene	baseMean	log2FoldChange	lfcSE	stat	pvalue	padj
bioA	8154.28	-4.59285	0.142502	-25.2127	2.90907e-140	2.4218e-138
cysJ	67210.8	-4.33349	0.253473	-13.1512	1.67419e-39	4.64588e-38
bioB	54110.3	-4.17341	0.0968321	-32.7723	1.46267e-235	9.74139e-233
hyp_3	14319.4	-4.17312	0.124773	-25.4311	1.14327e-142	1.08774e-140
thiC	63675.7	-4.04265	0.134236	-22.6665	9.60178e-114	5.81344e-112
hisG	40851.5	-3.70886	0.104546	-25.9108	5.03303e-148	6.704e-146
thiE	15906.1	-3.63894	0.106794	-24.7104	8.26128e-135	6.11335e-133
hisD	42890.6	-3.58556	0.0960142	-26.929	1.00648e-159	1.67579e-157
cysI	38118.3	-3.47414	0.110715	-22.347	1.29271e-110	7.17456e-109
metF	6045.28	-3.44259	0.387343	-6.306	2.86334e-10	4.65118e-09
bioF	54006.3	-3.29793	0.0838649	-27.4004	2.71097e-165	9.02755e-163
hisC	39859.3	-3.11233	0.0775482	-27.239	2.24452e-163	4.98283e-161
bioC	19182.7	-3.10505	0.0816025	-25.7963	9.74446e-147	1.08163e-144
cysT	5089.31	-3.05065	0.121586	-16.8658	8.03184e-64	2.6746e-62
cysK	23073.2	-2.97143	0.126353	-15.6026	6.98466e-55	2.21513e-53
thiF	19983.5	-2.81404	0.0949501	-19.1052	2.28555e-81	1.01478e-79
ribB	8868.37	-2.72317	0.0995154	-17.3156	3.58471e-67	1.32634e-65
cysG	39199.5	-2.71906	0.0965799	-17.7994	7.14472e-71	2.97399e-69
cysH	14236.1	-2.7112	0.0842738	-20.3052	1.15674e-91	5.50276e-90
cysD	21923.3	-2.63221	0.095299	-17.1273	9.29379e-66	3.25772e-64
metB	7748.24	-2.52958	0.124609	-12.2751	1.23275e-34	3.15773e-33
thiS	5643.82	-2.49262	0.114256	-13.0638	5.30288e-39	1.41269e-37
sucC	22005.5	-2.40423	0.0671357	-20.9162	3.80999e-97	1.95189e-95
cysW	4337.45	-2.22183	0.114686	-10.6537	1.67487e-26	3.71822e-25
yodO	9439.38	-2.208	0.156896	-7.69935	1.36763e-14	2.39695e-13
pRNA12	2435.46	-2.14171	0.140411	-8.1312	4.25047e-16	7.86338e-15
hisB	35958.3	-2.07392	0.0696136	-15.4269	1.07979e-53	3.26881e-52
cysB	8048.41	-2.04089	0.101882	-10.2166	1.67108e-24	3.59013e-23
cysC	7385.61	-1.96812	0.0905246	-10.6946	1.0789e-26	2.47776e-25
bioD	11204.5	-1.95706	0.0883603	-10.8314	2.44425e-27	5.81383e-26
hisH	19213.5	-1.87309	0.0864178	-10.1032	5.34871e-24	1.1132e-22
hisF	21741.4	-1.81403	0.0875098	-9.30215	1.3763e-20	2.77763e-19
purH	28090.2	-1.80307	0.0718312	-11.18	5.10795e-29	1.25996e-27
aspC	7942.01	-1.78965	0.125775	-6.27833	3.42236e-10	5.42689e-09
hisA	24749.8	-1.77675	0.0982027	-7.9097	2.58016e-15	4.64429e-14
pRNA6	2785.97	-1.57002	0.193326	-2.94849	0.00319333	0.0373115
hisI	15099.3	-1.56351	0.0678441	-8.30597	9.90055e-17	1.88393e-15
cysN	32495.6	-1.55209	0.0727243	-7.59148	3.16277e-14	5.40104e-13
sucD	15241.1	-1.52118	0.0778827	-6.69184	2.20378e-11	3.66929e-10
dedA	5099.54	-1.51118	0.111386	-4.58927	4.44804e-06	6.30296e-05
thiG	31345.4	-1.50925	0.0858813	-5.92967	3.03536e-09	4.59443e-08
pckA	10884.5	-1.47792	0.124663	-3.83374	0.000126208	0.00164813
pssA	5146.73	-1.4445	0.125674	-3.53695	0.000404773	0.0049922
nadB	4856.23	-1.42785	0.107527	-3.97904	6.91938e-05	0.000940471
thiH	13387.9	-1.41398	0.0824144	-5.02311	5.08422e-07	7.36107e-06
aroH	3314.43	-1.40243	0.125017	-3.21901	0.00128634	0.0155765
purB	32841.3	-1.38082	0.0887943	-4.2888	1.79639e-05	0.00024925
gnd	30324.6	-1.36864	0.0730242	-5.04816	4.46081e-07	6.60199e-06
BCI_0207	6073.37	-1.32205	0.100415	-3.20717	0.00134049	0.0159423
gidA	10508.3	1.24983	0.0664756	3.75828	0.000171083	0.00219118
accD	10913.4	1.47983	0.0773956	6.19977	5.65446e-10	8.75784e-09
metJ_degen	1911.88	1.6286	0.162403	3.87059	0.000108571	0.00144617
gcvT	6392.75	1.80297	0.0868666	9.24371	2.38088e-20	4.66372e-19
aspA	30638.3	2.43902	0.0627511	22.9321	2.22266e-116	1.48029e-114
Val_tRNA2	5600.98	2.51347	0.416651	3.63246	0.000280728	0.00352764
BCI_0109	21333.7	2.57708	0.113353	13.913	5.28038e-44	1.52901e-42
momp	200321	2.64246	0.0934887	17.5685	4.29063e-69	1.68092e-67

## Sheet: 3mil_fct_1
gene	baseMean	log2FoldChange	lfcSE	stat	pvalue	padj
bioA	3251.66	-4.60896	0.139047	-25.9549	1.59903e-148	1.77492e-146
cysJ	26636	-4.34788	0.25396	-13.1827	1.10343e-39	3.06203e-38
hyp_3	5714.35	-4.18788	0.123318	-25.851	2.37359e-147	2.2583e-145
bioB	21491	-4.17976	0.0949836	-33.4769	1.04483e-245	6.95856e-243
thiC	25284.7	-4.05206	0.127929	-23.8573	8.49998e-126	5.66099e-124
hisG	16185.4	-3.71123	0.103828	-26.1127	2.61302e-150	3.48054e-148
thiE	6341.57	-3.65001	0.109808	-24.1331	1.12434e-128	8.32011e-127
hisD	17023.3	-3.59025	0.0956458	-27.0817	1.61582e-161	5.38068e-159
cysI	15079	-3.47377	0.111554	-22.1755	5.92196e-109	3.58548e-107
metF	2385.88	-3.46801	0.385915	-6.3952	1.6034e-10	2.60454e-09
bioF	21460.8	-3.30349	0.0865398	-26.6177	4.23429e-156	9.40012e-154
hisC	15710.2	-3.10476	0.0795917	-26.4445	4.22498e-154	7.0346e-152
bioC	7501.57	-3.08515	0.0823643	-25.3161	2.12159e-141	1.76622e-139
cysT	2010.98	-3.04901	0.120801	-16.9618	1.57407e-64	5.51754e-63
cysK	9137.86	-2.97408	0.122933	-16.0582	5.01247e-58	1.58967e-56
thiF	7978.63	-2.8279	0.0961038	-19.02	1.16442e-80	5.17001e-79
ribB	3527.43	-2.73053	0.102914	-16.8153	1.88559e-63	6.279e-62
cysG	15572.4	-2.72504	0.0961641	-17.9385	5.90584e-72	2.3137e-70
cysH	5634.78	-2.71005	0.0886072	-19.2993	5.44913e-83	2.59223e-81
cysD	8662.78	-2.62943	0.0937316	-17.384	1.09048e-67	4.03477e-66
metB	3104.55	-2.5513	0.121047	-12.8157	1.33985e-37	3.56937e-36
thiS	2241.34	-2.49615	0.12511	-11.9587	5.84933e-33	1.49833e-31
sucC	8822.17	-2.4245	0.0733011	-19.4335	4.01837e-84	2.05864e-82
yodO	3763.58	-2.22474	0.145163	-8.43695	3.25716e-17	6.1979e-16
cysW	1698.18	-2.20204	0.118445	-10.1485	3.36444e-24	7.46905e-23
pRNA12	927.161	-2.07125	0.151487	-7.07158	1.53178e-12	2.61582e-11
hisB	14143.3	-2.06114	0.0753053	-14.0911	4.30594e-45	1.24685e-43
cysB	3198.47	-2.04725	0.103949	-10.0746	7.15217e-24	1.53656e-22
cysC	2928.22	-1.96979	0.095454	-10.1598	2.99694e-24	6.88263e-23
bioD	4455.49	-1.96437	0.0907327	-10.6287	2.19093e-26	5.21128e-25
hisH	7592.18	-1.86907	0.0875502	-9.92658	3.19016e-23	6.63951e-22
hisF	8659.27	-1.82435	0.0901491	-9.14433	6.00015e-20	1.17532e-18
purH	11197.6	-1.81485	0.0749402	-10.8733	1.54501e-27	3.81102e-26
aspC	3142.09	-1.78836	0.127596	-6.17856	6.46904e-10	1.0258e-08
hisA	9785.32	-1.7734	0.102767	-7.52568	5.24451e-14	9.44012e-13
hisI	5979.6	-1.56279	0.0745662	-7.54753	4.43584e-14	8.2063e-13
cysN	12842.9	-1.54769	0.0767755	-7.13369	9.77164e-13	1.71261e-11
sucD	6114.04	-1.5454	0.085068	-6.41129	1.44291e-10	2.40244e-09
thiG	12494	-1.52127	0.0908805	-5.73578	9.70635e-09	1.46919e-07
dedA	2001.85	-1.49433	0.111831	-4.42031	9.85592e-06	0.000136751
pckA	4331.47	-1.48796	0.124601	-3.91619	8.99597e-05	0.00119826
pssA	2045.23	-1.45132	0.128574	-3.5102	0.000447776	0.00562677
thiH	5303.78	-1.41425	0.0860226	-4.81564	1.46726e-06	2.12433e-05
nadB	1885.19	-1.3892	0.100029	-3.89084	9.98991e-05	0.00130456
gnd	12032.4	-1.37201	0.0774378	-4.80394	1.55573e-06	2.20451e-05
purB	12945.1	-1.37154	0.087507	-4.24583	2.17783e-05	0.000296008
BCI_0207	2395.13	-1.31337	0.103487	-3.02813	0.00246073	0.0297972

## Sheet: total_fct_0.5
genes	baseMean	log2FoldChange	lfcSE	stat	pvalue	padj
bioA	8154.28	-4.59285	0.142502	-28.7214	2.06262e-181	1.37371e-179
cysJ	67210.8	-4.33349	0.253473	-15.1238	1.12788e-51	2.34741e-50
bioB	54110.3	-4.17341	0.0968321	-37.9359	0	0
rapZ (hyp_3)	14319.4	-4.17312	0.124773	-29.4383	1.77505e-190	1.47773e-188
thiC	63675.7	-4.04265	0.134236	-26.3912	1.72709e-153	8.84803e-152
hisG	40851.5	-3.70886	0.104546	-30.6934	6.97348e-207	6.63476e-205
thiE	15906.1	-3.63894	0.106794	-29.3923	6.88293e-190	5.09337e-188
hisD	42890.6	-3.58556	0.0960142	-32.1365	1.36314e-226	2.26963e-224
cysI	38118.3	-3.47414	0.110715	-26.8631	5.93719e-159	3.29514e-157
metF	6045.28	-3.44259	0.387343	-7.59685	3.03432e-14	3.67429e-13
bioF	54006.3	-3.29793	0.0838649	-33.3624	4.81639e-244	1.06924e-241
hisC	39859.3	-3.11233	0.0775482	-33.6866	9.0881e-249	3.02634e-246
bioC	19182.7	-3.10505	0.0816025	-31.9236	1.25587e-223	1.67282e-221
cysT	5089.31	-3.05065	0.121586	-20.9781	1.03967e-97	3.29725e-96
cysK	23073.2	-2.97143	0.126353	-19.5598	3.40268e-85	1.03008e-83
thiF	19983.5	-2.81404	0.0949501	-24.3711	3.46239e-131	1.5373e-129
ribB	8868.37	-2.72317	0.0995154	-22.34	1.51062e-110	5.03035e-109
cysG	39199.5	-2.71906	0.0965799	-22.9764	8.01817e-117	3.33756e-115
cysH	14236.1	-2.7112	0.0842738	-26.2382	9.73592e-152	4.63151e-150
cysD	21923.3	-2.63221	0.095299	-22.3739	7.06763e-111	2.47739e-109
metB	7748.24	-2.52958	0.124609	-16.2876	1.20822e-59	2.98027e-58
thiS	5643.82	-2.49262	0.114256	-17.4399	4.10721e-68	1.09416e-66
sucC	22005.5	-2.40423	0.0671357	-28.3638	5.65082e-177	3.42131e-175
cysW	4337.45	-2.22183	0.114686	-15.0135	5.99156e-51	1.17364e-49
yodO	9439.38	-2.208	0.156896	-10.8862	1.3417e-27	1.98572e-26
pRNA12	2435.46	-2.14171	0.140411	-11.6922	1.39735e-31	2.2158e-30
hisB	35958.3	-2.07392	0.0696136	-22.6094	3.50457e-113	1.29669e-111
cysB	8048.41	-2.04089	0.101882	-15.1242	1.12129e-51	2.34741e-50
cysC	7385.61	-1.96812	0.0905246	-16.218	3.76521e-59	8.95582e-58
bioD	11204.5	-1.95706	0.0883603	-16.49	4.32698e-61	1.10837e-59
hisH	19213.5	-1.87309	0.0864178	-15.889	7.55116e-57	1.73416e-55
hisF	21741.4	-1.81403	0.0875098	-15.0158	5.78627e-51	1.16777e-49
purH	28090.2	-1.80307	0.0718312	-18.1408	1.51858e-73	4.21407e-72
aspC	7942.01	-1.78965	0.125775	-10.2537	1.13906e-24	1.64916e-23
hisA	24749.8	-1.77675	0.0982027	-13.0012	1.20429e-38	2.11068e-37
hyp_6	350.077	-1.65241	0.28138	-4.09558	4.21107e-05	0.000315121
pRNA6	2785.97	-1.57002	0.193326	-5.5348	3.1159e-08	3.0973e-07
hisI	15099.3	-1.56351	0.0678441	-15.6758	2.21385e-55	4.91475e-54
cysN	32495.6	-1.55209	0.0727243	-14.4668	1.96529e-47	3.63579e-46
sucD	15241.1	-1.52118	0.0778827	-13.1118	2.82002e-39	5.07604e-38
dedA	5099.54	-1.51118	0.111386	-9.07816	1.10422e-19	1.47081e-18
thiG	31345.4	-1.50925	0.0858813	-11.7517	6.92396e-32	1.12472e-30
pckA	10884.5	-1.47792	0.124663	-7.84457	4.34435e-15	5.35803e-14
pssA	5146.73	-1.4445	0.125674	-7.51548	5.67003e-14	6.62499e-13
nadB	4856.23	-1.42785	0.107527	-8.62906	6.18603e-18	8.07823e-17
thiH	13387.9	-1.41398	0.0824144	-11.09	1.40272e-28	2.12321e-27
aroH	3314.43	-1.40243	0.125017	-7.21848	5.25723e-13	5.93443e-12
purB	32841.3	-1.38082	0.0887943	-9.91979	3.41461e-23	4.73778e-22
gnd	30324.6	-1.36864	0.0730242	-11.8952	1.25347e-32	2.08703e-31
BCI_0207	6073.37	-1.32205	0.100415	-8.18653	2.68874e-16	3.37868e-15
pRNA10	4519.07	-1.28808	0.173463	-4.54323	5.53975e-06	4.5549e-05
hyp_9	414.507	-1.24302	0.18678	-3.97805	6.94822e-05	0.000502991
ribA	868.347	-1.16698	0.186226	-3.58154	0.000341574	0.00229786
Ala_tRNA2	398.004	-1.15044	0.208115	-3.12536	0.00177586	0.0109511
hyp_20	1137.7	-1.12216	0.139612	-4.45637	8.33598e-06	6.77044e-05
purD	32654.3	-1.08665	0.0778178	-7.53877	4.74427e-14	5.64229e-13
metK	13194.9	-1.04248	0.0809626	-6.70038	2.07882e-11	2.23305e-10
cls	3235.44	-1.00671	0.0978742	-5.17713	2.25329e-07	2.14385e-06
dsvC	3241.68	-0.973226	0.0945503	-5.00502	5.58569e-07	5.16677e-06
ung	5497.33	-0.951302	0.160366	-2.81421	0.00488977	0.0275982
ABC_trans	16870.4	-0.932688	0.0897911	-4.81883	1.44401e-06	1.28228e-05
BCI_0250	7149.06	-0.918708	0.0770294	-5.43569	5.45844e-08	5.34606e-07
rnr	20587.2	-0.911408	0.0815495	-5.04489	4.53786e-07	4.25664e-06
relA_degen	3376.03	-0.902624	0.098632	-4.08209	4.46327e-05	0.000330282
nc_21	9708.54	-0.893669	0.0953667	-4.12795	3.66006e-05	0.000279582
metA	1984.99	-0.892709	0.146262	-2.68496	0.00725377	0.0395985
slyA	19987.4	-0.882209	0.0863139	-4.42812	9.50561e-06	7.62739e-05
purA	26341.7	-0.86158	0.0830688	-4.35277	1.34426e-05	0.000105327
glyA	35031.8	-0.847754	0.0818511	-4.24862	2.15094e-05	0.000166572
pfkA	13500.9	-0.842848	0.125292	-2.73639	0.00621179	0.0341905
pyrC	2148.98	-0.840954	0.0941738	-3.62048	0.00029406	0.00199841
uppS	4810.85	-0.807636	0.0826067	-3.72411	0.000196006	0.00137411
hyp_16	6963.04	-0.798865	0.09961	-3.00035	0.00269667	0.01618
murA	18473.4	-0.798824	0.0755418	-3.95574	7.6297e-05	0.000546385
rmuc	9351.95	-0.794392	0.0874355	-3.36697	0.00076	0.00486692
troB	50599.8	-0.79123	0.0826361	-3.52425	0.000424681	0.00282838
mdtH	3621.45	-0.789126	0.0822689	-3.5144	0.00044075	0.00290633
GTP-binding	2866.74	-0.768517	0.093647	-2.86734	0.00413943	0.0237661
panE	5470.08	-0.71783	0.0820594	-2.65454	0.00794156	0.0430007
cysA	8663.76	-0.704356	0.072816	-2.80647	0.00500878	0.0280323
folC	6329.56	0.677887	0.0677484	2.6257	0.00864719	0.0464438
iscS	14627.7	0.712542	0.0638817	3.32712	0.000877486	0.00556577
rimM	26694.4	0.714843	0.0672118	3.1965	0.00139105	0.00865834
nrdB	23182.3	0.730322	0.0801821	2.87248	0.00407259	0.0235856
ssb	31703.4	0.742512	0.0661991	3.66337	0.00024892	0.00172688
rplD	42608.1	0.751087	0.0862218	2.91211	0.00358998	0.0211586
rpsP	12052.9	0.756606	0.077414	3.31473	0.000917325	0.00576357
hyp_13	4521.41	0.768043	0.0931168	2.87856	0.0039949	0.0233386
rpsJ	25567.2	0.77506	0.0888446	3.09596	0.00196175	0.0119865
BCI_0174	6999.77	0.781872	0.0723544	3.89571	9.79107e-05	0.000693707
rpsS	23508.3	0.788225	0.104796	2.75035	0.00595312	0.0330398
hfq	1830.79	0.792994	0.0957964	3.05851	0.00222443	0.0134679
mutH	3623.15	0.801925	0.106151	2.84429	0.004451	0.0253365
rplC	53785.6	0.802875	0.101437	2.98584	0.002828	0.0168165
rpsC	83156.3	0.804455	0.0659288	4.61794	3.87569e-06	3.35106e-05
rplP	57323.7	0.835535	0.0730003	4.59635	4.29962e-06	3.62474e-05
rplB	76802.8	0.851841	0.0622928	5.64818	1.62158e-08	1.63632e-07
gpsA	24791.3	0.853589	0.0857015	4.12582	3.69418e-05	0.000279582
rplV	29977.1	0.861497	0.104288	3.46632	0.000527634	0.00344514
clpP	26504.3	0.862715	0.07343	4.9396	7.82822e-07	7.14191e-06
pyrD	34106.2	0.869574	0.0611086	6.04783	1.46808e-09	1.55197e-08
gyrA	111695	0.882112	0.0660436	5.78575	7.21885e-09	7.39655e-08
rplW	21408.4	0.8845	0.0879593	4.37133	1.23491e-05	9.79103e-05
rpsQ	43017.4	0.896525	0.0681748	5.8163	6.01627e-09	6.26069e-08
rpmC	25554.9	0.90503	0.0872556	4.64188	3.45254e-06	3.02551e-05
tolB_gene	4768.99	0.963723	0.127895	3.62581	0.000288052	0.00197776
hsp	117015	0.966454	0.136726	3.4116	0.000645832	0.00417596
orn	37116.3	1.03764	0.117392	4.57982	4.65374e-06	3.87424e-05
purN	9644.05	1.04205	0.117445	4.61533	3.92467e-06	3.35106e-05
cca	30092.4	1.07597	0.0767235	7.50712	6.04443e-14	6.94067e-13
lolB	10102	1.08851	0.0833197	7.06322	1.62691e-12	1.80587e-11
pRNA4	4601.52	1.0969	0.11148	5.35427	8.59002e-08	8.29124e-07
purM	20952.1	1.10275	0.0595816	10.1163	4.67761e-24	6.62827e-23
rnhA	1395.59	1.11257	0.151411	4.04573	5.21599e-05	0.000381742
metC	47409.8	1.11441	0.0717245	8.56626	1.06902e-17	1.36916e-16
folD	23315.2	1.12147	0.0650629	9.55175	1.27521e-21	1.73325e-20
gidA	10508.3	1.24983	0.0664756	11.2798	1.65052e-29	2.55638e-28
accD	10913.4	1.47983	0.0773956	12.6601	9.83851e-37	1.68012e-35
metJ_degen	1911.88	1.6286	0.162403	6.94935	3.66975e-12	4.00665e-11
gcvT	6392.75	1.80297	0.0868666	14.9997	7.37916e-51	1.40415e-49
aspA	30638.3	2.43902	0.0627511	30.9001	1.19084e-209	1.32183e-207
Val_tRNA2	5600.98	2.51347	0.416651	4.83251	1.34823e-06	1.21341e-05
BCI_0109	21333.7	2.57708	0.113353	18.324	5.32164e-75	1.54096e-73
momp	200321	2.64246	0.0934887	22.9168	3.16081e-116	1.23829e-114

## Sheet: 3mil_fct_0.5
gene	baseMean	log2FoldChange	lfcSE	stat	pvalue	padj
bioA	3251.66	-4.60896	0.139047	-29.5509	6.4e-192	5.33e-190
cysJ	26636	-4.34788	0.25396	-15.1515	7.4e-52	1.64e-50
hyp_3	5714.35	-4.18788	0.123318	-29.9055	1.67e-196	1.59e-194
bioB	21491	-4.17976	0.0949836	-38.741	0	0
thiC	25284.7	-4.05206	0.127929	-27.7657	1.13e-169	7.49e-168
hisG	16185.4	-3.71123	0.103828	-30.9284	4.96e-210	5.5e-208
thiE	6341.57	-3.65001	0.109808	-28.6865	5.63e-181	4.17e-179
hisD	17023.3	-3.59025	0.0956458	-32.3094	5.17e-229	8.6e-227
cysI	15079	-3.47377	0.111554	-26.6576	1.46e-156	8.1e-155
metF	2385.88	-3.46801	0.385915	-7.69082	1.46e-14	1.74e-13
bioF	21460.8	-3.30349	0.0865398	-32.3954	3.19e-230	7.07e-228
hisC	15710.2	-3.10476	0.0795917	-32.7265	6.55e-235	2.18e-232
bioC	7501.57	-3.08515	0.0823643	-31.3867	3.07e-216	4.09e-214
cysT	2010.98	-3.04901	0.120801	-21.1008	7.81e-99	2.6e-97
cysK	9137.86	-2.97408	0.122933	-20.1254	4.42e-90	1.34e-88
thiF	7978.63	-2.8279	0.0961038	-24.2227	1.28e-129	5.69e-128
ribB	3527.43	-2.73053	0.102914	-21.6737	3.63e-104	1.27e-102
cysG	15572.4	-2.72504	0.0961641	-23.1379	1.92e-118	7.54e-117
cysH	5634.78	-2.71005	0.0886072	-24.9421	2.6e-137	1.24e-135
cysD	8662.78	-2.62943	0.0937316	-22.7184	2.95e-114	1.09e-112
metB	3104.55	-2.5513	0.121047	-16.9463	2.05e-64	5.46e-63
thiS	2241.34	-2.49615	0.12511	-15.9551	2.62e-57	6.47e-56
sucC	8822.17	-2.4245	0.0733011	-26.2547	6.32e-152	3.24e-150
yodO	3763.58	-2.22474	0.145163	-11.8813	1.48e-32	2.46e-31
cysW	1698.18	-2.20204	0.118445	-14.3699	8e-47	1.57e-45
pRNA12	927.161	-2.07125	0.151487	-10.3722	3.32e-25	5.02e-24
hisB	14143.3	-2.06114	0.0753053	-20.7308	1.83e-95	5.8e-94
cysB	3198.47	-2.04725	0.103949	-14.8847	4.14e-50	8.62e-49
cysC	2928.22	-1.96979	0.095454	-15.3979	1.69e-53	3.88e-52
bioD	4455.49	-1.96437	0.0907327	-16.1394	1.35e-58	3.45e-57
hisH	7592.18	-1.86907	0.0875502	-15.6376	4.04e-55	9.6e-54
hisF	8659.27	-1.82435	0.0901491	-14.6907	7.4e-49	1.49e-47
purH	11197.6	-1.81485	0.0749402	-17.5453	6.46e-69	1.79e-67
aspC	3142.09	-1.78836	0.127596	-10.0972	5.69e-24	8.42e-23
hisA	9785.32	-1.7734	0.102767	-12.391	2.92e-35	5.26e-34
hyp_6	141.043	-1.68585	0.293129	-4.04548	5.22e-05	0.000395179
hisI	5979.6	-1.56279	0.0745662	-14.253	4.3e-46	8.17e-45
cysN	12842.9	-1.54769	0.0767755	-13.6462	2.13e-42	3.94e-41
sucD	6114.04	-1.5454	0.085068	-12.2889	1.04e-34	1.82e-33
thiG	12494	-1.52127	0.0908805	-11.2375	2.67e-29	4.23e-28
pRNA6	1061.8	-1.50066	0.185968	-5.38079	7.42e-08	7.48e-07
dedA	2001.85	-1.49433	0.111831	-8.89135	6.04e-19	8.02e-18
pckA	4331.47	-1.48796	0.124601	-7.92901	2.21e-15	2.72e-14
pssA	2045.23	-1.45132	0.128574	-7.399	1.37e-13	1.6e-12
thiH	5303.78	-1.41425	0.0860226	-10.6281	2.21e-26	3.42e-25
nadB	1885.19	-1.3892	0.100029	-8.88938	6.15e-19	8.02e-18
gnd	12032.4	-1.37201	0.0774378	-11.2607	2.05e-29	3.33e-28
purB	12945.1	-1.37154	0.087507	-9.95966	2.29e-23	3.31e-22
aroH	1287	-1.36229	0.138478	-6.22693	4.76e-10	5.11e-09
BCI_0207	2395.13	-1.31337	0.103487	-7.85966	3.85e-15	4.66e-14
pRNA10	1782.61	-1.28266	0.166664	-4.69605	2.65e-06	2.36e-05
hyp_9	164.706	-1.24574	0.216482	-3.44484	0.000571405	0.00392325
ribA	343.949	-1.16654	0.200793	-3.31954	0.000901644	0.0060656
Ala_tRNA2	156.782	-1.13594	0.238665	-2.66458	0.00770855	0.0427824
hyp_20	451.92	-1.12651	0.161407	-3.88154	0.000103799	0.000759669
purD	12914.5	-1.08343	0.0792514	-7.36182	1.81e-13	2.08e-12
metK	5294.06	-1.06968	0.0866761	-6.57257	4.95e-11	5.4e-10
cls	1291.28	-1.02259	0.106857	-4.89054	1.01e-06	9.43e-06
ung	2181.68	-0.957075	0.156	-2.92998	0.00338987	0.0207124
dsvC	1268.43	-0.945967	0.106539	-4.18593	2.84e-05	0.000222307
metA	805.169	-0.944989	0.1504	-2.95871	0.00308928	0.0190505
ABC_trans	6713.02	-0.942566	0.0937612	-4.72014	2.36e-06	2.15e-05
relA_degen	1353.94	-0.929752	0.102726	-4.18349	2.87e-05	0.000222307
BCI_0250	2841.4	-0.925725	0.0868442	-4.90217	9.48e-07	9.02e-06
rnr	8202.35	-0.924198	0.0850656	-4.98672	6.14e-07	5.93e-06
nc_21	3842.41	-0.891788	0.100452	-3.90026	9.61e-05	0.000711065
slyA	7930.98	-0.886236	0.0872521	-4.42667	9.57e-06	7.97e-05
purA	10452.1	-0.86543	0.0844445	-4.32746	1.51e-05	0.000124021
glyA	13863.2	-0.845705	0.0815823	-4.2375	2.26e-05	0.000179207
pfkA	5347.48	-0.843189	0.124783	-2.75029	0.00595418	0.0338931
uppS	1926.39	-0.831694	0.0938306	-3.53503	0.000407729	0.0028584
pyrC	847.236	-0.829751	0.10951	-3.01116	0.00260251	0.0165074
rmuc	3726.22	-0.807572	0.0931662	-3.30133	0.000962286	0.00640883
troB	20126.9	-0.800793	0.0839193	-3.58431	0.000337968	0.00242029
hyp_16	2757.84	-0.799158	0.0944397	-3.16771	0.00153642	0.0100319
murA	7282.66	-0.787804	0.0806909	-3.56675	0.000361435	0.00256081
panE	2183.78	-0.735689	0.0882369	-2.67109	0.00756057	0.0423138
cysA	3426.03	-0.700326	0.0764313	-2.62099	0.0087674	0.0482569
rimM	10581.3	0.712218	0.0753772	2.81541	0.00487149	0.0284598
ssb	12599	0.730013	0.0753559	3.05236	0.00227052	0.0145401
nrdB	9161.64	0.739403	0.0852904	2.80691	0.00500185	0.0289672
iscS	5738.82	0.749448	0.0728245	3.42534	0.000614037	0.00417295
rplD	16857.2	0.755962	0.0912889	2.80387	0.00504935	0.0289902
hyp_13	1795	0.759821	0.0956389	2.71669	0.00659392	0.0372166
BCI_0174	2785.54	0.763695	0.0841761	3.13265	0.00173234	0.0112013
rpsP	4757.85	0.769789	0.0910814	2.96207	0.00305579	0.0190201
rpsJ	10110.2	0.78189	0.0945573	2.98115	0.00287164	0.0180426
rpsC	33065.4	0.789616	0.0700423	4.13487	3.55e-05	0.000271877
rplC	21347.3	0.795508	0.101425	2.91355	0.00357339	0.0214404
rpsS	9282.64	0.801245	0.10322	2.91848	0.00351739	0.0212962
rplP	22749.9	0.82816	0.0764571	4.29208	1.77e-05	0.000143766
hfq	715.607	0.845036	0.119154	2.89572	0.00378292	0.0224949
rplB	30443.9	0.849226	0.0666665	5.23841	1.62e-07	1.59e-06
gpsA	9823.12	0.852703	0.0885079	3.98499	6.75e-05	0.000504984
rplV	11899.6	0.853579	0.101587	3.48056	0.000500374	0.00347135
clpP	10497.7	0.863183	0.0779326	4.66021	3.16e-06	2.77e-05
gyrA	44270.1	0.879813	0.0699005	5.43361	5.52e-08	5.66e-07
pyrD	13471.8	0.881241	0.0659898	5.77727	7.59e-09	8.03e-08
rpmC	10157.1	0.891453	0.0883795	4.42923	9.46e-06	7.97e-05
rpsQ	17039.4	0.896687	0.073947	5.36447	8.12e-08	8.07e-07
rplW	8433.24	0.907673	0.0891282	4.57401	4.78e-06	4.14e-05
Met_tRNA2	954.753	0.912753	0.146004	2.827	0.00469859	0.0276926
tolB_gene	1909.23	0.919991	0.128705	3.2632	0.00110161	0.00726407
hsp	46361.6	0.96694	0.129422	3.6079	0.000308688	0.00223463
purN	3837.04	1.02363	0.114938	4.5557	5.22e-06	4.46e-05
orn	14701.4	1.03898	0.11284	4.77644	1.78e-06	1.65e-05
cca	11929.8	1.0726	0.0813079	7.04237	1.89e-12	2.1e-11
purM	8285.08	1.1106	0.0678731	8.99616	2.34e-19	3.18e-18
metC	18733.9	1.12584	0.0741795	8.43689	3.26e-17	4.1e-16
lolB	3966.3	1.12893	0.0881173	7.1374	9.51e-13	1.07e-11
folD	9213.03	1.13282	0.0692931	9.13251	6.69e-20	9.29e-19
pRNA4	1800.06	1.15461	0.115746	5.65557	1.55e-08	1.62e-07
rnhA	543.405	1.19187	0.163212	4.23905	2.24e-05	0.000179207
gidA	4157.02	1.25601	0.0769943	9.81902	9.32e-23	1.32e-21
accD	4303.32	1.50504	0.0839545	11.9712	5.03e-33	8.59e-32
metJ_degen	740.971	1.76775	0.143683	8.82322	1.11e-18	1.42e-17
gcvT	2527.81	1.81538	0.0873743	15.0545	3.22e-51	6.93e-50
aspA	12094.9	2.47055	0.073652	26.7549	1.08e-157	6.55e-156
Val_tRNA2	2210.45	2.55891	0.438211	4.69843	2.62e-06	2.36e-05
marR	8426.56	2.60776	0.112112	18.8005	7.48e-79	2.17e-77
momp	79349	2.64412	0.0908007	23.6135	2.8e-123	1.17e-121

## Sheet: total_fct_0
gene	baseMean	log2FoldChange	lfcSE	stat	pvalue	padj
bioA	8154.28	-4.59285	0.142502	-32.2301	6.68192e-228	4.0456e-226
cysJ	67210.8	-4.33349	0.253473	-17.0964	1.57792e-65	2.33532e-64
bioB	54110.3	-4.17341	0.0968321	-43.0994	0	0
hyp_3	14319.4	-4.17312	0.124773	-33.4456	2.98094e-245	1.9853e-243
thiC	63675.7	-4.04265	0.134236	-30.116	2.98904e-199	1.42193e-197
hisG	40851.5	-3.70886	0.104546	-35.476	1.15335e-275	9.6016e-274
thiE	15906.1	-3.63894	0.106794	-34.0742	1.77742e-254	1.31529e-252
hisD	42890.6	-3.58556	0.0960142	-37.3441	3.16423e-305	3.5123e-303
cysI	38118.3	-3.47414	0.110715	-31.3792	3.89483e-216	1.99535e-214
metF	6045.28	-3.44259	0.387343	-8.88769	6.23914e-19	4.19724e-18
bioF	54006.3	-3.29793	0.0838649	-39.3244	0	0
hisC	39859.3	-3.11233	0.0775482	-40.1342	0	0
bioC	19182.7	-3.10505	0.0816025	-38.0509	0	0
cysT	5089.31	-3.05065	0.121586	-25.0904	6.32959e-139	1.91614e-137
cysK	23073.2	-2.97143	0.126353	-23.517	2.73281e-122	7.91327e-121
thiF	19983.5	-2.81404	0.0949501	-29.637	4.98127e-193	2.07345e-191
ribB	8868.37	-2.72317	0.0995154	-27.3643	7.29044e-165	2.42772e-163
cysG	39199.5	-2.71906	0.0965799	-28.1535	2.17058e-174	8.03113e-173
cysH	14236.1	-2.7112	0.0842738	-32.1713	4.45154e-227	2.47061e-225
cysD	21923.3	-2.63221	0.095299	-27.6205	6.30451e-168	2.2099e-166
metB	7748.24	-2.52958	0.124609	-20.3002	1.28108e-91	2.58545e-90
thiS	5643.82	-2.49262	0.114256	-21.816	1.63409e-105	4.03076e-104
sucC	22005.5	-2.40423	0.0671357	-35.8114	7.33147e-281	6.97537e-279
cysW	4337.45	-2.22183	0.114686	-19.3732	1.29867e-83	2.40253e-82
yodO	9439.38	-2.208	0.156896	-14.073	5.56693e-45	7.26976e-44
pRNA12	2435.46	-2.14171	0.140411	-15.2532	1.56813e-52	2.17578e-51
hisB	35958.3	-2.07392	0.0696136	-29.7919	4.97722e-195	2.20989e-193
cysB	8048.41	-2.04089	0.101882	-20.0318	2.90737e-89	5.69502e-88
cysC	7385.61	-1.96812	0.0905246	-21.7413	8.34705e-105	1.98541e-103
bioD	11204.5	-1.95706	0.0883603	-22.1487	1.07412e-108	2.7514e-107
hisH	19213.5	-1.87309	0.0864178	-21.6749	3.54368e-104	8.13825e-103
hisF	21741.4	-1.81403	0.0875098	-20.7294	1.87964e-95	3.91199e-94
purH	28090.2	-1.80307	0.0718312	-25.1015	4.78404e-139	1.51722e-137
aspC	7942.01	-1.78965	0.125775	-14.2291	6.04892e-46	8.05716e-45
hisA	24749.8	-1.77675	0.0982027	-18.0927	3.63721e-73	5.90825e-72
hyp_6	350.077	-1.65241	0.28138	-5.87254	4.29162e-09	1.55338e-08
pRNA6	2785.97	-1.57002	0.193326	-8.12111	4.61958e-16	2.56387e-15
hisI	15099.3	-1.56351	0.0678441	-23.0456	1.62641e-117	4.51329e-116
cysN	32495.6	-1.55209	0.0727243	-21.342	4.6242e-101	1.02657e-99
sucD	15241.1	-1.52118	0.0778827	-19.5317	5.90822e-85	1.12425e-83
dedA	5099.54	-1.51118	0.111386	-13.5671	6.279e-42	7.6033e-41
thiG	31345.4	-1.50925	0.0858813	-17.5737	3.92052e-69	6.21682e-68
pckA	10884.5	-1.47792	0.124663	-11.8554	2.01759e-32	2.09955e-31
pssA	5146.73	-1.4445	0.125674	-11.494	1.4138e-30	1.42665e-29
nadB	4856.23	-1.42785	0.107527	-13.2791	3.06168e-40	3.57733e-39
thiH	13387.9	-1.41398	0.0824144	-17.1569	5.5802e-66	8.44639e-65
aroH	3314.43	-1.40243	0.125017	-11.2179	3.32902e-29	3.26048e-28
purB	32841.3	-1.38082	0.0887943	-15.5508	1.57167e-54	2.2755e-53
gnd	30324.6	-1.36864	0.0730242	-18.7422	2.23976e-78	3.82482e-77
BCI_0207	6073.37	-1.32205	0.100415	-13.1659	1.3791e-39	1.58358e-38
hyp_29	52.026	-1.30327	0.464545	-2.80549	0.00502405	0.00894652
pRNA10	4519.07	-1.28808	0.173463	-7.42569	1.1219e-13	5.49403e-13
hyp_9	414.507	-1.24302	0.18678	-6.655	2.83291e-11	1.22514e-10
ribA	868.347	-1.16698	0.186226	-6.26645	3.69374e-10	1.44826e-09
Ala_tRNA2	398.004	-1.15044	0.208115	-5.52788	3.24128e-08	1.07935e-07
hyp_20	1137.7	-1.12216	0.139612	-8.03772	9.15272e-16	4.95586e-15
purD	32654.3	-1.08665	0.0778178	-13.964	2.58388e-44	3.24691e-43
metK	13194.9	-1.04248	0.0809626	-12.8761	6.13818e-38	6.70168e-37
Pro_tRNA1	455.739	-1.03969	0.27245	-3.81607	0.000135592	0.000311395
cls	3235.44	-1.00671	0.0978742	-10.2857	8.17252e-25	6.80363e-24
dsvC	3241.68	-0.973226	0.0945503	-10.2932	7.56126e-25	6.37443e-24
ung	5497.33	-0.951302	0.160366	-5.93208	2.99113e-09	1.10672e-08
ABC_trans	16870.4	-0.932688	0.0897911	-10.3873	2.83224e-25	2.51503e-24
pRNA13	1507.68	-0.928243	0.178383	-5.20365	1.95413e-07	6.13893e-07
BCI_0250	7149.06	-0.918708	0.0770294	-11.9267	8.5894e-33	9.08022e-32
holD	171.626	-0.917358	0.268388	-3.41803	0.000630761	0.00131689
rnr	20587.2	-0.911408	0.0815495	-11.1761	5.33667e-29	5.07746e-28
relA_degen	3376.03	-0.902624	0.098632	-9.15144	5.61795e-20	3.98038e-19
nc_21	9708.54	-0.893669	0.0953667	-9.37087	7.19346e-21	5.15145e-20
metA	1984.99	-0.892709	0.146262	-6.10348	1.03786e-09	3.97249e-09
Gln_tRNA	2131.32	-0.882684	0.179777	-4.90987	9.11345e-07	2.68565e-06
slyA	19987.4	-0.882209	0.0863139	-10.2209	1.59792e-24	1.31385e-23
purA	26341.7	-0.86158	0.0830688	-10.3719	3.32912e-25	2.87947e-24
hyp_24	749.552	-0.858402	0.166565	-5.15357	2.55578e-07	7.95398e-07
glyA	35031.8	-0.847754	0.0818511	-10.3573	3.87863e-25	3.31176e-24
rnfB	517.724	-0.843693	0.178701	-4.72125	2.34395e-06	6.55911e-06
pfkA	13500.9	-0.842848	0.125292	-6.72706	1.73124e-11	7.58555e-11
pyrC	2148.98	-0.840954	0.0941738	-8.92981	4.26733e-19	2.92994e-18
uppS	4810.85	-0.807636	0.0826067	-9.77689	1.41497e-22	1.08318e-21
hyp_25	493.381	-0.802911	0.23528	-3.41257	0.000643532	0.00133935
rnt	10711.9	-0.801214	0.121157	-6.61303	3.7652e-11	1.61782e-10
hyp_16	6963.04	-0.798865	0.09961	-8.01993	1.05805e-15	5.63728e-15
murA	18473.4	-0.798824	0.0755418	-10.5746	3.90856e-26	3.5177e-25
rmuc	9351.95	-0.794392	0.0874355	-9.08547	1.03255e-19	7.16329e-19
troB	50599.8	-0.79123	0.0826361	-9.57488	1.01976e-21	7.3822e-21
mdtH	3621.45	-0.789126	0.0822689	-9.59203	8.63686e-22	6.32104e-21
GTP-binding	2866.74	-0.768517	0.093647	-8.20654	2.27661e-16	1.28493e-15
Ser_tRNA2	1100.65	-0.737649	0.134456	-5.48617	4.10737e-08	1.36095e-07
ptsH	2704.41	-0.728636	0.0948987	-7.67805	1.61533e-14	8.33962e-14
tyrS	9685.52	-0.727669	0.0907144	-8.02153	1.04436e-15	5.60924e-15
Pro_tRNA	420.553	-0.725849	0.295269	-2.45826	0.0139613	0.0230154
panE	5470.08	-0.71783	0.0820594	-8.74769	2.17764e-18	1.40807e-17
ispF	2109.24	-0.71391	0.0961891	-7.42195	1.1541e-13	5.61044e-13
BCI_0170	7969.51	-0.711277	0.08582	-8.28801	1.15156e-16	6.84769e-16
ffh	18180.5	-0.711086	0.0933927	-7.61394	2.65864e-14	1.36204e-13
cysA	8663.76	-0.704356	0.072816	-9.67309	3.92339e-22	2.90331e-21
pabB	4998.1	-0.701812	0.086515	-8.11202	4.97854e-16	2.74026e-15
rpoZ	2442.38	-0.644555	0.116172	-5.54828	2.88501e-08	9.65536e-08
greA	17480.9	-0.642569	0.0919552	-6.98785	2.79135e-12	1.28209e-11
tmk	6734.96	-0.636609	0.10734	-5.93074	3.01565e-09	1.10963e-08
Arg_tRNA1	448.214	-0.63456	0.199866	-3.17493	0.00149873	0.0029444
ptsI	12220.1	-0.633026	0.0719145	-8.80247	1.33835e-18	8.73862e-18
BCI_0575	5952.15	-0.62242	0.0752894	-8.26703	1.37332e-16	8.0231e-16
ftn	8126.57	-0.616132	0.124891	-4.93336	8.08285e-07	2.4032e-06
eno	27850.2	-0.608682	0.0791391	-7.6913	1.45652e-14	7.57848e-14
queF	6738.19	-0.596953	0.102142	-5.84436	5.08519e-09	1.82083e-08
apaH	12660.4	-0.59668	0.0799582	-7.4624	8.49587e-14	4.1913e-13
rrmJ	17396.9	-0.595814	0.0709729	-8.39495	4.6609e-17	2.82196e-16
pRNA18	2030.73	-0.594638	0.110549	-5.37895	7.49227e-08	2.39897e-07
zwf	40406.8	-0.559408	0.0963253	-5.80749	6.34179e-09	2.22296e-08
gmk	14513.9	-0.558248	0.109473	-5.0994	3.40735e-07	1.04096e-06
mltC	2480.1	-0.558208	0.131645	-4.24025	2.23275e-05	5.61137e-05
bolA	4206.06	-0.555882	0.0841143	-6.60866	3.87827e-11	1.65572e-10
gltX	14312.2	-0.54694	0.0840022	-6.51101	7.46465e-11	3.08786e-10
murI	627.149	-0.545469	0.234463	-2.32646	0.0199939	0.0317803
lolA	3237.87	-0.524774	0.152095	-3.4503	0.000559956	0.00118391
dsrF	2858.57	-0.519522	0.0925744	-5.61194	2.00074e-08	6.83331e-08
fbaA	8913.28	-0.510614	0.0864192	-5.90858	3.45073e-09	1.26274e-08
pdxB	24269.3	-0.503798	0.0697652	-7.22133	5.14828e-13	2.43174e-12
pgk	9363.9	-0.502687	0.0719782	-6.98387	2.8716e-12	1.30992e-11
rpmF	2247.34	-0.498036	0.103798	-4.79811	1.60167e-06	4.59789e-06
pdxH	13450.3	-0.494687	0.0710309	-6.96439	3.29825e-12	1.49431e-11
cdsA	5267.53	-0.494496	0.0849231	-5.82287	5.78441e-09	2.04916e-08
def	3364.73	-0.492095	0.143156	-3.43748	0.000587146	0.00123747
truB	8215.33	-0.490206	0.0774253	-6.33134	2.4304e-10	9.6925e-10
atpB	4261.86	-0.486631	0.164189	-2.96386	0.0030381	0.00563614
hemK	4843.36	-0.48447	0.104962	-4.61566	3.9184e-06	1.06953e-05
nuoN	6219.52	-0.476242	0.0848158	-5.61501	1.96549e-08	6.74752e-08
trmE	7696.41	-0.468051	0.0681686	-6.86608	6.59887e-12	2.94956e-11
BCI_0479	3662.76	-0.467286	0.112212	-4.16431	3.123e-05	7.64676e-05
BCI_0271	19531	-0.467208	0.0727721	-6.42015	1.36141e-10	5.52865e-10
recG	20095.6	-0.460428	0.150967	-3.04986	0.00228947	0.00435654
hyp_10	4210.51	-0.456787	0.105183	-4.34279	1.40683e-05	3.63158e-05
mutS	14570.3	-0.4545	0.0708086	-6.41871	1.3743e-10	5.54719e-10
hyp_15	357.174	-0.448033	0.195564	-2.29097	0.0219649	0.0345014
ksgA	1826.77	-0.436624	0.126419	-3.45378	0.000552779	0.00117245
BCI_0316	17357.2	-0.426106	0.0970622	-4.39003	1.13338e-05	2.94855e-05
pgsA	2359.71	-0.425017	0.123843	-3.43189	0.000599388	0.00125532
Met_tRNA	3982.1	-0.423525	0.146931	-2.88249	0.00394551	0.00721898
BCI_0208	5583.67	-0.423262	0.0981552	-4.31217	1.61663e-05	4.14107e-05
mraW	10636.4	-0.408171	0.108647	-3.75686	0.000172056	0.000387126
Leu_tRNA2	2500.74	-0.408073	0.168112	-2.42738	0.0152082	0.0248861
Gln_tRNA_2	2884.51	-0.406607	0.174517	-2.32989	0.0198117	0.031566
mviN	10975.3	-0.403114	0.0850506	-4.73969	2.14046e-06	6.01497e-06
antiporter	33193.5	-0.399896	0.0737799	-5.42012	5.95587e-08	1.92554e-07
pta	11997.8	-0.398769	0.0831475	-4.79592	1.61929e-06	4.62851e-06
panC	4332.91	-0.394625	0.100469	-3.92781	8.57213e-05	0.000200317
folA	1112.8	-0.394232	0.146475	-2.69147	0.00711386	0.0122742
smpA	1400.49	-0.393207	0.119107	-3.3013	0.000962373	0.00194815
polA	6342.94	-0.391386	0.116078	-3.37174	0.000746938	0.00152129
ackA	16194.4	-0.390984	0.0869895	-4.49461	6.96963e-06	1.8372e-05
gpmA	9324.09	-0.390484	0.0943724	-4.13769	3.50825e-05	8.49635e-05
dsrE	2454.67	-0.390131	0.110711	-3.52388	0.000425271	0.000913646
truA	15998.9	-0.388745	0.0858615	-4.52758	5.96639e-06	1.58311e-05
sufE	4601.44	-0.384537	0.100581	-3.82314	0.000131762	0.000303646
aroA	12564.9	-0.383502	0.0825648	-4.64486	3.40299e-06	9.36525e-06
murB	17969.7	-0.382838	0.0701823	-5.4549	4.90007e-08	1.59973e-07
cyaA_degen	10819.4	-0.381375	0.0908699	-4.19693	2.70556e-05	6.70818e-05
rnc	7943.73	-0.374497	0.0733318	-5.10689	3.27506e-07	1.00516e-06
fumC	8453.93	-0.369901	0.0944104	-3.91802	8.9281e-05	0.000207906
ispD	19220.2	-0.368452	0.0906697	-4.06367	4.83075e-05	0.000114903
BCI_0311	6480.82	-0.357112	0.0781127	-4.57175	4.83661e-06	1.29886e-05
mreD	3657.02	-0.353585	0.125642	-2.81422	0.00488959	0.00873047
pRNA15	4151.92	-0.353034	0.103592	-3.40794	0.000654559	0.00135806
aspS	17288.4	-0.351704	0.110647	-3.17862	0.0014798	0.00291581
pabC	12188.9	-0.34851	0.0749626	-4.64912	3.33355e-06	9.21221e-06
crp	10275.9	-0.347926	0.0917018	-3.7941	0.000148179	0.000336817
ftsH	39565	-0.347855	0.0813216	-4.27752	1.88987e-05	4.80234e-05
BCI_0003	1102.05	-0.347441	0.142365	-2.4405	0.0146668	0.0240593
bioH	5018.04	-0.346669	0.105659	-3.28101	0.00103435	0.00207494
plsC	4958	-0.344173	0.0820123	-4.1966	2.70946e-05	6.70818e-05
pgl	5744.02	-0.339985	0.0842261	-4.03658	5.42371e-05	0.000128548
serC	14154.4	-0.339485	0.0746605	-4.54704	5.44051e-06	1.45517e-05
gshA	2792.72	-0.337503	0.112058	-3.01186	0.00259656	0.00485761
ftsK	5372.85	-0.335812	0.0933263	-3.59825	0.000320361	0.000697257
recC	18369.9	-0.333898	0.0817744	-4.08317	4.4426e-05	0.000106049
ruvC	5418.94	-0.328197	0.102932	-3.18847	0.00143026	0.00282656
BCI_0454	5017.27	-0.325298	0.101768	-3.19646	0.00139124	0.00275764
coaE	1068.88	-0.321503	0.141944	-2.265	0.0235128	0.0365023
rpsL	3888.67	-0.321332	0.0843939	-3.80753	0.000140362	0.000320141
nadD	1427.54	-0.318625	0.136391	-2.33612	0.019485	0.03112
pyrF	3274.94	-0.316965	0.100598	-3.15079	0.00162828	0.00315242
marC	2370.62	-0.312763	0.102719	-3.04483	0.00232813	0.00441198
coaA	1390.5	-0.311121	0.135789	-2.29121	0.0219513	0.0345014
ligA	9192.86	-0.310859	0.0994054	-3.12719	0.00176489	0.00339715
dsrH	1859.26	-0.308682	0.110062	-2.80463	0.00503745	0.00894652
ppk	5401.92	-0.307241	0.0873501	-3.51735	0.000435876	0.000930428
hemC	12070.6	-0.301033	0.118323	-2.54416	0.0109541	0.0184228
BCI_0406	15662	-0.297459	0.0779882	-3.81416	0.000136648	0.000312741
gene_2	2627.89	-0.293661	0.0976015	-3.00877	0.00262306	0.00489344
secF	16199.6	-0.289031	0.106566	-2.71221	0.00668354	0.0116525
glmM	15630.4	-0.286979	0.102501	-2.79977	0.00511385	0.00905804
tilS	26453.9	-0.279607	0.0793973	-3.52162	0.000428918	0.00091852
lepA	64948	-0.279354	0.0750079	-3.72432	0.00019584	0.000431885
priN	6593.39	-0.279	0.0736322	-3.7891	0.000151192	0.000341336
metR	2733.86	-0.275116	0.0880097	-3.12598	0.00177215	0.00340131
aroC	6925.81	-0.274917	0.0736418	-3.73316	0.000189091	0.000419782
thiL	12851.8	-0.272622	0.107465	-2.53684	0.0111859	0.0187469
rne	4599.38	-0.268148	0.0906815	-2.95704	0.00310611	0.00573038
lepB	6819.23	-0.259468	0.105281	-2.46453	0.0137194	0.0226728
trxB	8280.56	-0.257706	0.0996999	-2.58482	0.00974307	0.0165533
htpX	13261.5	-0.251756	0.0830751	-3.03046	0.0024418	0.0045939
rbfA	3969.43	-0.249354	0.0879299	-2.83583	0.00457067	0.00820503
nusB	9018.17	-0.249317	0.112594	-2.21431	0.0268077	0.0410434
era	13702.4	-0.248266	0.0819682	-3.02881	0.00245519	0.00460607
atpE	3532.05	-0.248045	0.105077	-2.3606	0.0182455	0.0292808
birA	3428.32	-0.242844	0.102597	-2.36697	0.0179344	0.0289421
yidC	10776.3	-0.228094	0.0981002	-2.32511	0.0200658	0.0318187
BCI_0419	20199.4	-0.22723	0.0735772	-3.08832	0.00201295	0.00384133
fabD	36671.6	-0.226246	0.0785867	-2.87893	0.00399026	0.00728085
BCI_0428	4710.78	-0.225961	0.104107	-2.17047	0.0299713	0.0455729
ftsE	8027.66	-0.22515	0.071695	-3.14039	0.00168724	0.00325711
acpS	7457.79	-0.217838	0.070215	-3.10245	0.00191927	0.00367309
pdxJ	13438.6	-0.210179	0.0664708	-3.16198	0.001567	0.00306048
prmB	6650.92	-0.209162	0.0754344	-2.77276	0.00555825	0.00974156
rplY	6666.07	-0.20651	0.0718885	-2.87264	0.00407059	0.00740715
pgpA	10037.6	-0.201935	0.0704205	-2.86756	0.00413655	0.00750665
minE	7622.89	-0.201783	0.0797445	-2.53037	0.0113943	0.0189715
hyp_21	12444	-0.199798	0.0633358	-3.15458	0.00160728	0.00312083
ecfE	14808.5	-0.194788	0.0897998	-2.16914	0.0300719	0.0456217
queA	18192.8	-0.186785	0.066989	-2.7883	0.0052986	0.00933563
panB	7082.82	-0.170136	0.0764738	-2.22477	0.0260968	0.0401397
M23	7111.18	-0.167281	0.0720936	-2.32033	0.0203231	0.03215
BCI_0447	5768.67	-0.167261	0.0767031	-2.18063	0.0292107	0.0445179
pykA	13598.9	-0.166346	0.06224	-2.67265	0.00752538	0.0129173
sufD	15851.4	-0.15884	0.0654691	-2.42619	0.0152585	0.0249072
nuoG	50525.4	0.164203	0.073212	2.24284	0.0249072	0.0384877
rpsE	12127	0.173728	0.0698263	2.488	0.0128463	0.0212826
degQ	7229.31	0.174747	0.0698648	2.50122	0.0123767	0.0205558
ileS	45321.9	0.177352	0.0751759	2.35916	0.0183164	0.0293238
pheS	9198.52	0.178194	0.0742511	2.39988	0.0164004	0.0267059
lpdA	12833.9	0.180213	0.0733661	2.45635	0.0140358	0.023081
dacB	7936.61	0.184086	0.0681524	2.7011	0.0069111	0.0120177
hisS	24350	0.189918	0.0802859	2.36552	0.0180046	0.0289638
pRNA8	19928.1	0.191276	0.0863201	2.21589	0.0266989	0.0409711
exsB	20680.7	0.191869	0.0632411	3.03392	0.00241395	0.00455436
BCI_0450	29147.9	0.193713	0.0579707	3.34156	0.000833082	0.00169156
rluD	5757.8	0.195382	0.0726354	2.68991	0.0071472	0.0122998
fabB	14303.3	0.195473	0.0604896	3.23151	0.00123138	0.00245539
nlpC	4726.43	0.203557	0.0802577	2.5363	0.0112031	0.0187469
cyoB	47693.7	0.20483	0.0725319	2.82399	0.00474296	0.00849143
mutL	10149.2	0.206984	0.0907799	2.28007	0.0226037	0.0352554
BCI_0585	8436.59	0.207766	0.0921307	2.25512	0.0241257	0.0373669
fldA	6994.87	0.208041	0.0879034	2.3667	0.0179476	0.0289421
mrdA	9307.13	0.209537	0.0637332	3.28772	0.00101004	0.00203228
gcp	15687.5	0.211681	0.0695324	3.04435	0.00233186	0.00441198
uvrD	22085.7	0.212339	0.0788293	2.69366	0.0070673	0.012238
prfA	18308.2	0.213691	0.0834947	2.55934	0.010487	0.0177719
pnp	68533.1	0.21857	0.0785082	2.78405	0.00536853	0.00943388
rpsK	12237.9	0.219681	0.0650168	3.37884	0.00072793	0.0014917
genX	13351.4	0.222136	0.0976442	2.27496	0.0229086	0.0356474
guaA	37842.7	0.226671	0.0810739	2.79585	0.0051763	0.00914433
nusA	17702.7	0.230372	0.0618131	3.72691	0.00019384	0.000428895
rho	66154	0.241752	0.0954686	2.53226	0.0113329	0.0189166
rpsD	18747.8	0.243638	0.0672899	3.62073	0.000293778	0.000643606
hyp_12	14015.4	0.246786	0.0833843	2.95962	0.00308019	0.00569835
prsA	13552.2	0.252276	0.0863448	2.92173	0.00348097	0.00640422
secY	32551.4	0.255024	0.0596303	4.27675	1.89642e-05	4.80234e-05
rplT	8330.64	0.25721	0.0813064	3.16347	0.00155903	0.00305386
htpG	17755	0.257299	0.0756465	3.40133	0.000670584	0.00138698
dnaN	22497.7	0.258321	0.0765217	3.37579	0.000736049	0.00150371
sufA	7245.02	0.259482	0.0767844	3.37936	0.000726537	0.0014917
rplO	10878.4	0.262708	0.0733535	3.58139	0.000341766	0.000739012
purC	3126.1	0.265819	0.102748	2.5871	0.00967886	0.0164862
fusA	33469.7	0.266209	0.0642049	4.14625	3.37963e-05	8.21472e-05
hyp_1	2252.24	0.267644	0.103107	2.59578	0.00943768	0.0161581
BCI_0086	4778.35	0.271585	0.106316	2.55451	0.0106337	0.0179292
rpoB	70766.6	0.271976	0.100982	2.69331	0.00707454	0.012238
rpoA	30210.8	0.274159	0.086837	3.15717	0.00159308	0.00310232
sufB	32905.5	0.274422	0.0587451	4.6714	2.99156e-06	8.30158e-06
lysP	8771.68	0.275749	0.11525	2.39261	0.016729	0.0271743
hflK	14120.1	0.279368	0.0774482	3.60716	0.000309568	0.000675976
artM	4529.06	0.279484	0.125096	2.23415	0.0254732	0.0392711
atpD	31208.7	0.281688	0.06523	4.31838	1.5718e-05	4.04176e-05
rp1F	12837.8	0.284391	0.0717712	3.96247	7.41797e-05	0.000174571
nuoCD	27853.1	0.285387	0.0866468	3.29368	0.000988833	0.00199565
cyoA	33210	0.286884	0.0768473	3.73317	0.000189082	0.000419782
atpG	15944.6	0.287189	0.0746757	3.84582	0.00012015	0.000277846
murG	25289.9	0.290063	0.0693973	4.17975	2.91833e-05	7.17199e-05
rpmD	4759.23	0.29216	0.0861558	3.39107	0.000696204	0.00143552
rpsH	10420.8	0.293016	0.0756715	3.87221	0.000107852	0.000250278
rpsM	11951.4	0.293339	0.0728963	4.02406	5.72028e-05	0.000135096
nuoE	7192.64	0.295091	0.0834199	3.53741	0.00040407	0.000870909
rplR	10045.7	0.29945	0.081195	3.68803	0.000225995	0.000496741
recJ	14270.2	0.302437	0.0659555	4.58547	4.52965e-06	1.22632e-05
hyp_14	1704.81	0.303623	0.106967	2.83848	0.00453286	0.00815914
mraY	25938.6	0.309725	0.0749173	4.13422	3.56161e-05	8.59431e-05
pRNA1	7023.45	0.310012	0.134399	2.30666	0.0210741	0.0332591
ispG	167364	0.31266	0.115025	2.7182	0.00656384	0.0114738
nuoF	21496.7	0.314815	0.0976714	3.2232	0.00126766	0.00252018
rpmH	1768.57	0.316311	0.138151	2.2896	0.0220443	0.0345447
aroQ	3770.04	0.318875	0.0850994	3.74709	0.0001789	0.00040117
gltP_degen	11392.9	0.326588	0.0662347	4.93077	8.1907e-07	2.42445e-06
nfo	5780.37	0.328684	0.0743304	4.42193	9.78252e-06	2.55496e-05
terC	6779.75	0.331478	0.101443	3.26762	0.00108456	0.00216912
guaB	50456.9	0.338193	0.0660682	5.11885	3.07401e-07	9.52229e-07
carB	40859.5	0.338471	0.0698967	4.84244	1.28252e-06	3.71373e-06
hslU	44356.3	0.340721	0.133237	2.55725	0.0105504	0.0178339
rpmG	7382.54	0.344922	0.120664	2.85854	0.004256	0.00770243
aroK	7035.67	0.345717	0.115833	2.9846	0.00283949	0.00528241
glmU	21976.1	0.346407	0.0790456	4.38237	1.17397e-05	3.04226e-05
atpH	11823.1	0.348074	0.119702	2.90783	0.00363945	0.00667733
ompH	23882.5	0.34911	0.0731277	4.77398	1.8062e-06	5.11884e-06
rpsG	7071.52	0.35024	0.0844272	4.14843	3.34766e-05	8.16682e-05
dcd	6542.71	0.350975	0.102229	3.43323	0.000596445	0.0012531
sppA	28751.5	0.353807	0.0591403	5.98251	2.19731e-09	8.17547e-09
rpmJ	2905	0.354806	0.124949	2.83961	0.00451683	0.00815233
gshB	23864.2	0.356691	0.0955234	3.73407	0.000188412	0.000419782
fabZ	4537.48	0.357012	0.103265	3.45724	0.000545747	0.00116124
BCI_0451	28966.8	0.362126	0.072398	5.00188	5.67747e-07	1.6956e-06
lspA	12036.3	0.36375	0.0717744	5.06797	4.02088e-07	1.21723e-06
dxs	14092.2	0.363947	0.0703968	5.16994	2.34165e-07	7.32179e-07
clpX	26337.4	0.365555	0.0749658	4.87629	1.08099e-06	3.14383e-06
alaS	33838	0.370182	0.0660768	5.60229	2.11536e-08	7.18792e-08
nuoH	11867.5	0.387666	0.0899542	4.3096	1.6355e-05	4.17335e-05
pth	4271.77	0.389135	0.0765959	5.08037	3.76707e-07	1.1456e-06
nusG	27119.8	0.391501	0.0672971	5.8175	5.97328e-09	2.10487e-08
rpmI	6986.79	0.391813	0.0719426	5.44619	5.14591e-08	1.67179e-07
hflC	16167.9	0.391849	0.0850164	4.6091	4.04415e-06	1.09935e-05
atpA	50843.6	0.392071	0.0827161	4.73996	2.1376e-06	6.01497e-06
rpmA	9335.19	0.397675	0.10486	3.79245	0.000149167	0.000337909
murD	29758.2	0.398593	0.0754264	5.28453	1.26026e-07	3.97788e-07
adk	10068	0.403972	0.0803503	5.02764	4.96558e-07	1.48968e-06
infC	19503.8	0.411155	0.0629015	6.53648	6.29816e-11	2.6381e-10
rplA	29047.1	0.413007	0.0841492	4.90803	9.19945e-07	2.69905e-06
thiD	17309.2	0.414734	0.0980264	4.23084	2.32819e-05	5.80739e-05
priA	10542.6	0.416215	0.0915719	4.54522	5.48773e-06	1.46193e-05
thrS	22466.9	0.418667	0.0668123	6.26632	3.69677e-10	1.44826e-09
folE	2880.37	0.419419	0.10149	4.13261	3.58666e-05	8.62351e-05
suhB	12185.1	0.420798	0.0938231	4.48501	7.29092e-06	1.91171e-05
rplQ	8540.89	0.424279	0.117949	3.59713	0.00032175	0.000697999
rpsO	22200.8	0.427789	0.0685676	6.23894	4.40554e-10	1.70587e-09
acpP	28803.2	0.432404	0.0800673	5.4005	6.64541e-08	2.13809e-07
pRNA16	2739.42	0.432955	0.103491	4.18351	2.87047e-05	7.08049e-05
carA	14672.7	0.437307	0.0754543	5.79565	6.80551e-09	2.37302e-08
tig	7849.06	0.443287	0.07581	5.84735	4.99475e-09	1.79811e-08
tsf	12404.7	0.444131	0.0736301	6.03192	1.62024e-09	6.13113e-09
secE	11489.6	0.444726	0.0648057	6.86246	6.76857e-12	3.00525e-11
lon	101621	0.454077	0.0783868	5.79277	6.92336e-09	2.40154e-08
mutM	33396.6	0.461632	0.116794	3.95252	7.73328e-05	0.000181351
rpsA	100465	0.462529	0.0957317	4.83152	1.35495e-06	3.90647e-06
rpsU	3671.72	0.462824	0.0770633	6.00576	1.90435e-09	7.12527e-09
hyp_17	3324.78	0.463647	0.0830413	5.58332	2.35967e-08	7.93706e-08
glmS	33040.3	0.474162	0.0566165	8.37498	5.52337e-17	3.31402e-16
Phe_tRNA	602.249	0.477164	0.20883	2.28494	0.0223166	0.0348893
smpB	22971.9	0.477469	0.0763872	6.25064	4.08785e-10	1.59211e-09
rplK	18377.4	0.478444	0.0687495	6.95923	3.42126e-12	1.53957e-11
trxA	17169	0.478737	0.0893131	5.36022	8.31219e-08	2.64876e-07
hyp_5	4801.17	0.481345	0.113072	4.25697	2.07219e-05	5.22756e-05
rplX	6158.85	0.482499	0.0826564	5.83741	5.302e-09	1.8883e-08
rplE	11819.9	0.489701	0.0894376	5.47533	4.367e-08	1.43981e-07
rplU	12300.2	0.496673	0.0970777	5.11624	3.11687e-07	9.61036e-07
dut	10604.3	0.503563	0.0762961	6.60012	4.1083e-11	1.74276e-10
hflX	11858.2	0.507547	0.0788573	6.43628	1.22439e-10	5.00274e-10
ddlA	25246.8	0.508011	0.0601837	8.441	3.14621e-17	1.94017e-16
rplJ	26694.7	0.508973	0.0780394	6.522	6.93769e-11	2.88781e-10
clpB	52402.7	0.5129	0.12113	4.23429	2.29272e-05	5.74041e-05
rpsN	9629.12	0.513557	0.0853779	6.0151	1.79777e-09	6.7645e-09
recA	18122.4	0.514391	0.096546	5.32794	9.93334e-08	3.15029e-07
rpsB	10453.3	0.515388	0.0726785	7.09134	1.32821e-12	6.18592e-12
minC	39548.3	0.521418	0.0924114	5.64236	1.67737e-08	5.78825e-08
sodA	31415.1	0.525453	0.0963043	5.45618	4.86487e-08	1.59606e-07
pRNA11	78344.8	0.541803	0.120553	4.49432	6.97914e-06	1.8372e-05
nrdA	35126.4	0.552807	0.0643005	8.59725	8.16463e-18	5.12985e-17
nuoB	23339.3	0.559703	0.0849668	6.58732	4.47849e-11	1.88777e-10
ndk	6429.48	0.561585	0.11503	4.88206	1.04982e-06	3.06658e-06
trmD	38731.2	0.563568	0.0659037	8.55138	1.2163e-17	7.57061e-17
ispH	38095.7	0.564414	0.0754296	7.48267	7.28301e-14	3.61977e-13
nuc	23058.8	0.567473	0.118641	4.78312	1.72596e-06	4.91235e-06
hyp_8a	19364.8	0.581087	0.103885	5.59358	2.22433e-08	7.51981e-08
rplN	6283.64	0.589692	0.0880484	6.69737	2.12206e-11	9.23718e-11
yhgI	12363.9	0.590869	0.0967574	6.10671	1.01705e-09	3.91533e-09
hyp_27	1025.91	0.597933	0.130592	4.57862	4.68063e-06	1.26206e-05
rpoD	52991.9	0.615959	0.073041	8.43306	3.36743e-17	2.05753e-16
ispA	7650.66	0.625965	0.0778151	8.04426	8.67657e-16	4.73655e-15
cysE	16586.2	0.627144	0.124455	5.0391	4.67717e-07	1.4095e-06
pyrE	1778.15	0.628469	0.15233	4.12571	3.69585e-05	8.85408e-05
rplL	17507.5	0.628723	0.0804803	7.81214	5.62247e-15	2.94848e-14
miaB	24543.2	0.633838	0.0889146	7.12861	1.01385e-12	4.7551e-12
cysS	10955	0.641494	0.0661857	9.69233	3.25022e-22	2.43218e-21
metG	23219.5	0.646164	0.0791282	8.16604	3.18668e-16	1.78347e-15
nuoI	12662	0.647243	0.101795	6.35831	2.03985e-10	8.18399e-10
pal	13055.8	0.650504	0.0879863	7.39324	1.43292e-13	6.91542e-13
sRNA	1.50586e+06	0.661978	0.0970653	6.81992	9.10896e-12	4.01759e-11
ispE	10491.9	0.663163	0.0742862	8.92714	4.37148e-19	2.97082e-18
rpsT	6137.63	0.667303	0.142174	4.69357	2.68478e-06	7.48144e-06
folC	6329.56	0.677887	0.0677484	10.0059	1.43521e-23	1.13792e-22
nuoJ	13986.1	0.679702	0.0827875	8.2102	2.2082e-16	1.25697e-15
hslV	46601	0.686424	0.310661	2.20956	0.027136	0.0414509
secG	11583.3	0.708407	0.273298	2.59207	0.00953998	0.0162914
iscS	14627.7	0.712542	0.0638817	11.1541	6.83918e-29	6.41534e-28
rimM	26694.4	0.714843	0.0672118	10.6357	2.03364e-26	1.85535e-25
nrdB	23182.3	0.730322	0.0801821	9.10829	8.36933e-20	5.86734e-19
ssb	31703.4	0.742512	0.0661991	11.2163	3.39004e-29	3.27212e-28
rplD	42608.1	0.751087	0.0862218	8.71111	3.00923e-18	1.90871e-17
BCI_0384	5767.03	0.75331	0.102382	7.35785	1.86897e-13	8.95492e-13
hyp_4	102684	0.754986	0.120026	6.29018	3.17106e-10	1.2571e-09
rpsP	12052.9	0.756606	0.077414	9.77351	1.46295e-22	1.10719e-21
hyp_13	4521.41	0.768043	0.0931168	8.24817	1.60844e-16	9.23469e-16
thiI	2232.32	0.774199	0.119133	6.49859	8.10742e-11	3.33305e-10
rpsJ	25567.2	0.77506	0.0888446	8.72377	2.69097e-18	1.72325e-17
BCI_0174	6999.77	0.781872	0.0723544	10.8061	3.21933e-27	2.97788e-26
rpsS	23508.3	0.788225	0.104796	7.52154	5.41345e-14	2.71079e-13
hfq	1830.79	0.792994	0.0957964	8.27791	1.25355e-16	7.38817e-16
mutH	3623.15	0.801925	0.106151	7.55456	4.2027e-14	2.13664e-13
rplC	53785.6	0.802875	0.101437	7.91501	2.4724e-15	1.30684e-14
rpsC	83156.3	0.804455	0.0659288	12.2019	3.03715e-34	3.26248e-33
groEL	292173	0.820308	0.344999	2.37771	0.0174205	0.0282289
rplP	57323.7	0.835535	0.0730003	11.4456	2.47289e-30	2.45812e-29
Met_tRNA2	2449.16	0.84644	0.143814	5.88567	3.96438e-09	1.44278e-08
rplB	76802.8	0.851841	0.0622928	13.6748	1.43638e-42	1.77154e-41
gpsA	24791.3	0.853589	0.0857015	9.96002	2.2801e-23	1.78653e-22
rplV	29977.1	0.861497	0.104288	8.26072	1.44795e-16	8.38553e-16
clpP	26504.3	0.862715	0.07343	11.7488	7.1625e-32	7.33881e-31
pyrD	34106.2	0.869574	0.0611086	14.23	5.9688e-46	8.05716e-45
pRNA17	5676.93	0.878495	0.189982	4.62411	3.76218e-06	1.03112e-05
gyrA	111695	0.882112	0.0660436	13.3565	1.08531e-40	1.29075e-39
rplW	21408.4	0.8845	0.0879593	10.0558	8.66356e-24	7.0365e-23
rpsQ	43017.4	0.896525	0.0681748	13.1504	1.69291e-39	1.91098e-38
rpmC	25554.9	0.90503	0.0872556	10.3722	3.31899e-25	2.87947e-24
tolB_gene	4768.99	0.963723	0.127895	7.53527	4.87312e-14	2.45871e-13
hsp	117015	0.966454	0.136726	7.06855	1.56563e-12	7.24103e-12
orn	37116.3	1.03764	0.117392	8.83904	9.65457e-19	6.36628e-18
purN	9644.05	1.04205	0.117445	8.87264	7.1433e-19	4.75744e-18
cca	30092.4	1.07597	0.0767235	14.024	1.11129e-44	1.42331e-43
lolB	10102	1.08851	0.0833197	13.0642	5.27371e-39	5.85381e-38
pRNA4	4601.52	1.0969	0.11148	9.83937	7.61842e-23	5.89984e-22
purM	20952.1	1.10275	0.0595816	18.5082	1.77482e-76	2.95508e-75
rnhA	1395.59	1.11257	0.151411	7.348	2.01198e-13	9.57128e-13
metC	47409.8	1.11441	0.0717245	15.5374	1.93764e-54	2.74567e-53
folD	23315.2	1.12147	0.0650629	17.2366	1.41052e-66	2.18466e-65
gidA	10508.3	1.24983	0.0664756	18.8014	7.35632e-79	1.28929e-77
accD	10913.4	1.47983	0.0773956	19.1204	1.70763e-81	3.07374e-80
metJ_degen	1911.88	1.6286	0.162403	10.0281	1.14696e-23	9.20332e-23
gcvT	6392.75	1.80297	0.0868666	20.7556	1.09077e-95	2.3434e-94
aspA	30638.3	2.43902	0.0627511	38.8681	0	0
Val_tRNA2	5600.98	2.51347	0.416651	6.03255	1.61388e-09	6.13113e-09
BCI_0109	21333.7	2.57708	0.113353	22.7351	2.01727e-114	5.37402e-113
momp	200321	2.64246	0.0934887	28.265	9.3042e-176	3.64506e-174

## Sheet: 3mil_fct_0
gene	baseMean	log2FoldChange	lfcSE	stat	pvalue	padj
bioA	3251.66	-4.60896	0.139047	-33.1468	6.30652e-241	4.20014e-239
cysJ	26636	-4.34788	0.25396	-17.1203	1.04647e-65	1.74237e-64
hyp_3	5714.35	-4.18788	0.123318	-33.9601	8.65532e-253	8.23492e-251
bioB	21491	-4.17976	0.0949836	-44.0051	0	0
thiC	25284.7	-4.05206	0.127929	-31.6741	3.52912e-220	1.95866e-218
hisG	16185.4	-3.71123	0.103828	-35.7441	8.18011e-280	9.07993e-278
thiE	6341.57	-3.65001	0.109808	-33.2398	2.86177e-242	2.11771e-240
hisD	17023.3	-3.59025	0.0956458	-37.537	0	0
cysI	15079	-3.47377	0.111554	-31.1398	6.98064e-213	3.57624e-211
metF	2385.88	-3.46801	0.385915	-8.98644	2.5537e-19	1.91097e-18
bioF	21460.8	-3.30349	0.0865398	-38.1731	0	0
hisC	15710.2	-3.10476	0.0795917	-39.0086	0	0
bioC	7501.57	-3.08515	0.0823643	-37.4573	4.56358e-307	6.07869e-305
cysT	2010.98	-3.04901	0.120801	-25.2399	1.46347e-140	4.64128e-139
cysK	9137.86	-2.97408	0.122933	-24.1926	2.659e-129	7.69953e-128
thiF	7978.63	-2.8279	0.0961038	-29.4254	2.59685e-190	1.153e-188
ribB	3527.43	-2.73053	0.102914	-26.5321	4.12773e-155	1.37453e-153
cysG	15572.4	-2.72504	0.0961641	-28.3374	1.19794e-176	4.69309e-175
cysH	5634.78	-2.71005	0.0886072	-30.585	1.93625e-205	9.211e-204
cysD	8662.78	-2.62943	0.0937316	-28.0528	3.69529e-173	1.36726e-171
metB	3104.55	-2.5513	0.121047	-21.0769	1.29509e-98	3.19456e-97
thiS	2241.34	-2.49615	0.12511	-19.9516	1.45082e-88	2.92802e-87
sucC	8822.17	-2.4245	0.0733011	-33.0759	6.60542e-240	3.99928e-238
yodO	3763.58	-2.22474	0.145163	-15.3257	5.14665e-53	7.29292e-52
cysW	1698.18	-2.20204	0.118445	-18.5912	3.78311e-77	7.19872e-76
pRNA12	927.161	-2.07125	0.151487	-13.6728	1.47586e-42	1.92729e-41
hisB	14143.3	-2.06114	0.0753053	-27.3704	6.17274e-165	2.16371e-163
cysB	3198.47	-2.04725	0.103949	-19.6947	2.39214e-86	4.68578e-85
cysC	2928.22	-1.96979	0.095454	-20.6361	1.30273e-94	2.89206e-93
bioD	4455.49	-1.96437	0.0907327	-21.6501	6.06353e-104	1.61532e-102
hisH	7592.18	-1.86907	0.0875502	-21.3486	4.01809e-101	1.02925e-99
hisF	8659.27	-1.82435	0.0901491	-20.2371	4.61897e-91	9.92333e-90
purH	11197.6	-1.81485	0.0749402	-24.2173	1.46314e-129	4.42931e-128
aspC	3142.09	-1.78836	0.127596	-14.0158	1.2484e-44	1.69681e-43
hisA	9785.32	-1.7734	0.102767	-17.2564	1.00178e-66	1.71073e-65
hyp_6	141.043	-1.68585	0.293129	-5.75121	8.86046e-09	3.35288e-08
hisI	5979.6	-1.56279	0.0745662	-20.9584	1.57193e-97	3.73895e-96
cysN	12842.9	-1.54769	0.0767755	-20.1587	2.25878e-90	4.7011e-89
sucD	6114.04	-1.5454	0.085068	-18.1666	9.49067e-74	1.75577e-72
thiG	12494	-1.52127	0.0908805	-16.7392	6.78478e-63	1.10211e-61
pRNA6	1061.8	-1.50066	0.185968	-8.06942	7.06348e-16	4.438e-15
dedA	2001.85	-1.49433	0.111831	-13.3624	1.00292e-40	1.26027e-39
pckA	4331.47	-1.48796	0.124601	-11.9418	7.1622e-33	7.57147e-32
pssA	2045.23	-1.45132	0.128574	-11.2878	1.50769e-29	1.56894e-28
thiH	5303.78	-1.41425	0.0860226	-16.4405	9.81222e-61	1.55594e-59
nadB	1885.19	-1.3892	0.100029	-13.8879	7.49805e-44	9.9874e-43
gnd	12032.4	-1.37201	0.0774378	-17.7175	3.07093e-70	5.38221e-69
purB	12945.1	-1.37154	0.087507	-15.6735	2.29634e-55	3.32469e-54
aroH	1287	-1.36229	0.138478	-9.8376	7.75365e-23	6.62042e-22
BCI_0207	2395.13	-1.31337	0.103487	-12.6912	6.61699e-37	7.59813e-36
hyp_29	21.0568	-1.28307	0.582751	-2.20174	0.0276835	0.0440308
pRNA10	1782.61	-1.28266	0.166664	-7.69609	1.40288e-14	8.19579e-14
hyp_9	164.706	-1.24574	0.216482	-5.7545	8.6898e-09	3.30709e-08
ribA	343.949	-1.16654	0.200793	-5.80968	6.25941e-09	2.40969e-08
Ala_tRNA2	156.782	-1.13594	0.238665	-4.75956	1.94013e-06	5.92718e-06
hyp_20	451.92	-1.12651	0.161407	-6.9793	2.96651e-12	1.44211e-11
holD	75.1775	-1.11922	0.313694	-3.56788	0.000359875	0.000804284
purD	12914.5	-1.08343	0.0792514	-13.6709	1.51589e-42	1.94151e-41
metK	5294.06	-1.06968	0.0866761	-12.3412	5.43561e-35	6.03353e-34
Pro_tRNA1	180.43	-1.04172	0.275192	-3.78543	0.000153444	0.000361109
cls	1291.28	-1.02259	0.106857	-9.56969	1.07222e-21	8.70854e-21
ung	2181.68	-0.957075	0.156	-6.13511	8.50982e-10	3.54221e-09
dsvC	1268.43	-0.945967	0.106539	-8.87903	6.74434e-19	4.93596e-18
metA	805.169	-0.944989	0.1504	-6.28319	3.31699e-10	1.40708e-09
ABC_trans	6713.02	-0.942566	0.0937612	-10.0528	8.92583e-24	7.82185e-23
pRNA13	600.021	-0.939738	0.176847	-5.31384	1.07339e-07	3.68493e-07
rnfB	213.829	-0.931299	0.220181	-4.22969	2.34017e-05	6.13604e-05
relA_degen	1353.94	-0.929752	0.102726	-9.05083	1.41889e-19	1.07384e-18
BCI_0250	2841.4	-0.925725	0.0868442	-10.6596	1.57264e-26	1.51794e-25
rnr	8202.35	-0.924198	0.0850656	-10.8645	1.70091e-27	1.69075e-26
nc_21	3842.41	-0.891788	0.100452	-8.87777	6.8213e-19	4.93803e-18
slyA	7930.98	-0.886236	0.0872521	-10.1572	3.07814e-24	2.77033e-23
Gln_tRNA	839.156	-0.870789	0.17717	-4.915	8.87819e-07	2.81565e-06
purA	10452.1	-0.86543	0.0844445	-10.2485	1.20178e-24	1.11165e-23
glyA	13863.2	-0.845705	0.0815823	-10.3663	3.53017e-25	3.3587e-24
pfkA	5347.48	-0.843189	0.124783	-6.75726	1.40628e-11	6.50404e-11
uppS	1926.39	-0.831694	0.0938306	-8.86378	7.73444e-19	5.53886e-18
pyrC	847.236	-0.829751	0.10951	-7.57697	3.53711e-14	2.03079e-13
rmuc	3726.22	-0.807572	0.0931662	-8.66808	4.39461e-18	3.08085e-17
hyp_24	289.618	-0.80101	0.197893	-4.0477	5.17242e-05	0.000129994
troB	20126.9	-0.800793	0.0839193	-9.54242	1.39539e-21	1.11967e-20
hyp_16	2757.84	-0.799158	0.0944397	-8.4621	2.6261e-17	1.78467e-16
murA	7282.66	-0.787804	0.0806909	-9.76324	1.61903e-22	1.36491e-21
rnt	4203.39	-0.780667	0.116469	-6.70278	2.04495e-11	9.39265e-11
mdtH	1411.15	-0.751012	0.100034	-7.50756	6.02415e-14	3.3715e-13
Ser_tRNA2	436.917	-0.742021	0.151361	-4.90232	9.47099e-07	2.98942e-06
ptsH	1075.69	-0.737724	0.104959	-7.0287	2.08461e-12	1.02841e-11
GTP-binding	1119.65	-0.735958	0.100751	-7.30469	2.779e-13	1.45733e-12
panE	2183.78	-0.735689	0.0882369	-8.33765	7.57813e-17	4.99707e-16
Pro_tRNA	166.731	-0.728544	0.3086	-2.36081	0.0182352	0.0302858
hyp_25	188.981	-0.728253	0.246884	-2.94978	0.00317998	0.00621271
tyrS	3823.75	-0.71987	0.0949346	-7.5828	3.38171e-14	1.95845e-13
BCI_0170	3163.26	-0.716068	0.0880988	-8.12801	4.36378e-16	2.76788e-15
ffh	7214.59	-0.71545	0.0950378	-7.52806	5.15016e-14	2.93163e-13
cysA	3426.03	-0.700326	0.0764313	-9.16282	5.05593e-20	3.91541e-19
pabB	1959.11	-0.677	0.0982171	-6.89289	5.4669e-12	2.60068e-11
ispF	819.919	-0.669499	0.114352	-5.85474	4.77764e-09	1.86076e-08
greA	6962.07	-0.655456	0.0942822	-6.95206	3.59997e-12	1.72488e-11
Arg_tRNA1	177.799	-0.635598	0.231592	-2.74447	0.00606085	0.0110894
ptsI	4834.86	-0.629806	0.0851516	-7.39629	1.4004e-13	7.58267e-13
tmk	2655.01	-0.625265	0.111413	-5.61213	1.99852e-08	7.27331e-08
rrmJ	6946.32	-0.614764	0.0750022	-8.19661	2.47255e-16	1.58338e-15
apaH	5046.25	-0.611439	0.084469	-7.23862	4.53265e-13	2.32211e-12
pRNA18	807.914	-0.604591	0.124627	-4.85118	1.22726e-06	3.80167e-06
rpoZ	950.51	-0.602673	0.121192	-4.97287	6.59683e-07	2.10215e-06
eno	10989.1	-0.599448	0.0814766	-7.3573	1.87662e-13	1.00793e-12
BCI_0575	2330.65	-0.594533	0.0890278	-6.67807	2.42116e-11	1.09693e-10
ftn	3184.41	-0.590675	0.126615	-4.66514	3.08409e-06	9.12891e-06
queF	2651.9	-0.58178	0.0970365	-5.99548	2.02888e-09	8.13995e-09
hemK	1982.31	-0.563968	0.11199	-5.03588	4.75668e-07	1.53784e-06
zwf	16023.8	-0.562361	0.0952597	-5.90346	3.55962e-09	1.39454e-08
murI	250.01	-0.56142	0.234923	-2.3898	0.0168574	0.0284228
bolA	1662.54	-0.550472	0.0922085	-5.96986	2.37454e-09	9.41334e-09
gmk	5727.56	-0.54943	0.108554	-5.06137	4.16257e-07	1.35896e-06
mltC	977.067	-0.545233	0.133208	-4.0931	4.25648e-05	0.000108199
gltX	5664	-0.544811	0.0839172	-6.49225	8.45649e-11	3.77988e-10
cdsA	2115.1	-0.527529	0.0918943	-5.7406	9.43392e-09	3.54971e-08
pdxB	9677.35	-0.519809	0.0776153	-6.69725	2.12371e-11	9.68762e-11
pgk	3730.7	-0.516617	0.0802551	-6.43719	1.21705e-10	5.4037e-10
pdxH	5356.78	-0.507894	0.0742734	-6.83816	8.02147e-12	3.78887e-11
truB	3273.87	-0.504834	0.083576	-6.04042	1.53717e-09	6.2424e-09
lolA	1270.99	-0.502884	0.158753	-3.16772	0.00153641	0.00314845
dsrF	1123.88	-0.500821	0.104729	-4.78205	1.73516e-06	5.35008e-06
fbaA	3516.35	-0.500544	0.0928009	-5.39373	6.90082e-08	2.39372e-07
BCI_0271	7802.74	-0.488148	0.0774866	-6.29977	2.9809e-10	1.27262e-09
def	1325.83	-0.479804	0.142506	-3.3669	0.000760181	0.00166818
recG	8012.92	-0.477546	0.144712	-3.29997	0.000966954	0.00209088
nuoN	2453.46	-0.465914	0.0887025	-5.25255	1.50007e-07	5.12331e-07
atpB	1670.55	-0.461371	0.159016	-2.90141	0.00371482	0.0071094
hyp_10	1667.83	-0.456357	0.118593	-3.8481	0.000119036	0.00028724
rpmF	875.162	-0.455651	0.114452	-3.98113	6.85872e-05	0.000169811
trmE	3009.1	-0.435281	0.0784399	-5.54923	2.86935e-08	1.03296e-07
mutS	5726.4	-0.434663	0.0794973	-5.46764	4.56055e-08	1.60705e-07
Leu_tRNA2	1000.41	-0.432896	0.167961	-2.57736	0.00995583	0.0173575
mviN	4392.51	-0.428864	0.0913946	-4.69245	2.69958e-06	8.02642e-06
pta	4799.56	-0.423337	0.0945342	-4.47813	7.52987e-06	2.12496e-05
pgsA	934.108	-0.42323	0.131823	-3.21059	0.00132462	0.00275687
folA	446.021	-0.423102	0.164743	-2.56826	0.0102211	0.0177735
BCI_0316	6865.93	-0.422719	0.0965416	-4.37862	1.19434e-05	3.30055e-05
ksgA	718.573	-0.418934	0.138151	-3.03243	0.00242593	0.00483733
BCI_0208	2206.63	-0.417255	0.103405	-4.03518	5.45616e-05	0.000136609
panC	1731.53	-0.41665	0.109728	-3.79713	0.000146383	0.000346944
antiporter	13216	-0.41276	0.0762851	-5.41075	6.27628e-08	2.18848e-07
Met_tRNA	1566.69	-0.407035	0.13976	-2.91239	0.0035867	0.00688398
ackA	6448.17	-0.403983	0.095033	-4.25098	2.12838e-05	5.625e-05
mraW	4205.18	-0.403641	0.101243	-3.98686	6.69543e-05	0.000166387
polA	2524.68	-0.403543	0.123186	-3.27589	0.00105328	0.00226286
gpmA	3709.64	-0.401407	0.0981587	-4.08937	4.32548e-05	0.000109535
Gln_tRNA_2	1137.62	-0.396492	0.164075	-2.41653	0.0156691	0.0264863
BCI_0479	1410.06	-0.395702	0.124514	-3.17796	0.00148313	0.00305809
murB	7152.88	-0.395043	0.0758931	-5.20526	1.93725e-07	6.45105e-07
sufE	1828.8	-0.392915	0.107337	-3.66058	0.000251642	0.00057395
dsrE	973.338	-0.392491	0.120958	-3.24487	0.00117506	0.00247047
truA	6345.01	-0.391642	0.0906655	-4.31963	1.5629e-05	4.18029e-05
smpA	554.423	-0.390973	0.145388	-2.68918	0.00716286	0.0129281
fumC	3366.35	-0.383136	0.0984863	-3.89024	0.000100143	0.00024451
rnc	3153.54	-0.379835	0.0847744	-4.48054	7.44534e-06	2.11004e-05
ispD	7647.1	-0.379649	0.0908244	-4.18003	2.91474e-05	7.55338e-05
aroA	4969.78	-0.379608	0.0866052	-4.3832	1.16948e-05	3.24531e-05
aspS	6889.1	-0.367114	0.110405	-3.32517	0.000883632	0.0019232
pgl	2299.23	-0.366696	0.0921863	-3.97777	6.95635e-05	0.00017159
mreD	1455.61	-0.365548	0.13843	-2.64068	0.00827407	0.0147735
cyaA_degen	4253.77	-0.36219	0.094326	-3.83976	0.000123153	0.000295037
BCI_0311	2568.75	-0.358473	0.0859486	-4.17078	3.03557e-05	7.83601e-05
ftsH	15702.1	-0.352772	0.0819169	-4.30647	1.65881e-05	4.41908e-05
BCI_0454	2004.02	-0.34659	0.107081	-3.23672	0.00120912	0.00252438
crp	4066.45	-0.345476	0.0902781	-3.82679	0.000129823	0.0003099
bioH	1986.38	-0.344488	0.123606	-2.78698	0.00532018	0.00989087
nadD	570.705	-0.342218	0.144175	-2.37362	0.0176145	0.0294017
serC	5610.64	-0.341067	0.0803057	-4.24711	2.16547e-05	5.70041e-05
recC	7293.21	-0.339723	0.0862326	-3.93961	8.16128e-05	0.000200569
gshA	1106.15	-0.337318	0.115259	-2.9266	0.00342687	0.00663459
pRNA15	1634.09	-0.336537	0.106011	-3.17455	0.00150068	0.00308473
coaE	424.994	-0.330871	0.1497	-2.21022	0.0270899	0.0433698
marC	944.83	-0.328488	0.111266	-2.95227	0.00315446	0.00619726
ftsK	2120.83	-0.326466	0.105585	-3.09198	0.00198829	0.00404954
plsC	1947.81	-0.322758	0.0829702	-3.89004	0.000100227	0.00024451
ruvC	2138.84	-0.318796	0.109441	-2.91294	0.0035804	0.00688398
pyrF	1296.91	-0.315968	0.114816	-2.75196	0.00592407	0.0108689
pabC	4767.65	-0.315743	0.0827545	-3.81541	0.000135956	0.000323381
ligA	3637.5	-0.308055	0.0998584	-3.08492	0.00203608	0.00413425
dsrH	735.959	-0.306527	0.124115	-2.46969	0.0135229	0.0229752
hemC	4788.03	-0.304829	0.115983	-2.62821	0.00858359	0.0152445
rne	1846.47	-0.303028	0.102732	-2.94968	0.00318098	0.00621271
gene_2	1044.44	-0.302044	0.119615	-2.52514	0.0115652	0.0199544
BCI_0406	6211.95	-0.300761	0.0820553	-3.66534	0.000247006	0.000565312
ppk	2134.4	-0.300627	0.0938003	-3.20497	0.00135075	0.0028025
aroC	2770.23	-0.300343	0.0793288	-3.78605	0.000153063	0.000361109
lepB	2738.92	-0.295883	0.105591	-2.80217	0.00507601	0.00949613
secF	6427.99	-0.293719	0.10267	-2.86079	0.00422581	0.0080182
tilS	10531.7	-0.292854	0.0801006	-3.65608	0.000256102	0.000582131
metR	1089.09	-0.289849	0.101797	-2.84733	0.00440874	0.00834153
rpsL	1518.72	-0.284262	0.0968679	-2.93453	0.00334049	0.00648621
glmM	6183.33	-0.283436	0.107118	-2.64602	0.00814445	0.0145812
lepA	25753.1	-0.282039	0.0762871	-3.69707	0.000218103	0.000502617
thiL	5101.71	-0.278237	0.10931	-2.54541	0.0109151	0.0189308
atpE	1411.08	-0.270276	0.113534	-2.38057	0.0172858	0.0289983
nadE	3350.8	-0.26848	0.11511	-2.33238	0.0196806	0.0325242
ribH	3259.08	-0.264266	0.114806	-2.30186	0.0213432	0.0349253
rplY	2692.44	-0.258199	0.0795397	-3.24616	0.00116973	0.00247047
era	5446.27	-0.257122	0.0895932	-2.86988	0.00410621	0.00781354
priN	2586.88	-0.2536	0.0852242	-2.97568	0.00292337	0.00577735
nusB	3575.97	-0.252076	0.112103	-2.24861	0.0245375	0.039665
trxB	3259.41	-0.241063	0.091626	-2.63095	0.00851473	0.0151626
htpX	5230.85	-0.24042	0.0835718	-2.87681	0.00401718	0.00766602
fabD	14533.8	-0.227542	0.0825154	-2.75757	0.00582322	0.0107134
yidC	4258.06	-0.22153	0.0972436	-2.27809	0.0227212	0.0369984
ftsE	3174.92	-0.220779	0.0799951	-2.7599	0.00578188	0.0106668
BCI_0419	7980.74	-0.220209	0.0790331	-2.78629	0.00533157	0.00989087
prmB	2644.78	-0.219347	0.084886	-2.58402	0.00976553	0.0171154
rbfA	1554.39	-0.218554	0.0972962	-2.24628	0.0246861	0.0398086
pdxJ	5337.26	-0.217105	0.0743107	-2.92158	0.00348263	0.006723
ecfE	5883.46	-0.202728	0.0893601	-2.26866	0.0232891	0.0378305
pgpA	3975.06	-0.201071	0.0802434	-2.50577	0.0122187	0.0209733
panB	2836.4	-0.199564	0.0847702	-2.35417	0.0185639	0.0307551
hyp_21	4917.23	-0.193063	0.0723222	-2.66948	0.00759691	0.0136376
minE	3009.84	-0.193047	0.0864269	-2.23365	0.0255064	0.0409331
pykA	5423.49	-0.184641	0.0715784	-2.57956	0.00989248	0.0172924
queA	7199.77	-0.184154	0.0727204	-2.53236	0.0113298	0.0195991
M23	2831.67	-0.181374	0.0830007	-2.18521	0.0288736	0.0455683
rnb	8479.6	-0.160902	0.0745545	-2.15818	0.0309138	0.0484438
dacB	3148.22	0.179792	0.0801271	2.24384	0.0248427	0.0399643
hisS	9677.41	0.179935	0.0829116	2.17021	0.0299912	0.0472203
ileS	17907.9	0.185121	0.0800778	2.31177	0.0207904	0.0341045
degQ	2851.06	0.188342	0.0834067	2.25812	0.0239384	0.0387907
rluD	2282.49	0.19305	0.0830817	2.32362	0.0201461	0.0331291
rpsE	4769.84	0.195576	0.0778842	2.51112	0.012035	0.0207114
exsB	8180.22	0.196384	0.0705408	2.78399	0.00536955	0.00993366
fabB	5660.39	0.198482	0.0701179	2.83069	0.00464472	0.00871376
pRNA8	7869.84	0.200928	0.0911486	2.2044	0.0274959	0.0439144
uvrD	8766.09	0.206321	0.0824915	2.50111	0.0123804	0.0211962
cyoB	18876.8	0.207602	0.0758261	2.73788	0.00618375	0.0112832
prfA	7253.95	0.213136	0.0862129	2.47221	0.0134281	0.0228724
gcp	6200.99	0.218254	0.083862	2.60254	0.00925354	0.0163471
pnp	27150.1	0.218339	0.0807749	2.70305	0.00687057	0.0124342
BCI_0450	11446.4	0.220706	0.0669376	3.29719	0.000976587	0.00210488
guaA	15009.9	0.222614	0.085855	2.5929	0.00951704	0.0167239
rpsK	4841.34	0.223825	0.0738595	3.03042	0.00244215	0.00485515
genX	5283.35	0.225451	0.0984105	2.29092	0.0219678	0.0358592
fldA	2754.95	0.225885	0.10292	2.19476	0.0281809	0.0446868
mrdA	3659.47	0.232694	0.0756266	3.07688	0.00209179	0.00422394
prsA	5402.1	0.232824	0.0858296	2.71263	0.00667523	0.0121136
hyp_12	5564.53	0.239685	0.0845436	2.83505	0.00458192	0.00863161
rho	26189.5	0.243658	0.0978129	2.49106	0.0127362	0.0217495
nusA	6981.32	0.244327	0.0694681	3.51711	0.000436268	0.000971754
rpsD	7420.47	0.246161	0.0759341	3.24177	0.00118789	0.00248784
purC	1246.05	0.246229	0.11447	2.15104	0.0314733	0.0492047
BCI_0086	1908.13	0.246315	0.103459	2.3808	0.0172751	0.0289983
hflK	5644.87	0.250287	0.0850967	2.94121	0.00326932	0.00636657
rpoA	12057.2	0.250414	0.0933704	2.68195	0.00731952	0.0131751
sufA	2875.56	0.253369	0.0776868	3.26141	0.00110858	0.00236639
secY	12900.6	0.253551	0.0659979	3.84181	0.000122131	0.000293645
dnaN	8915.66	0.257134	0.0763815	3.36644	0.00076145	0.00166818
rplO	4311.26	0.261211	0.0848992	3.07672	0.00209295	0.00422394
rplT	3295.89	0.26123	0.0871168	2.99862	0.00271203	0.00537563
cyoA	13253.3	0.263382	0.080822	3.25879	0.00111889	0.00238077
pRNA2	1770.9	0.267046	0.123143	2.16858	0.0301143	0.0473021
nuoCD	11088.4	0.269629	0.08838	3.05079	0.00228241	0.00457857
artM	1797.43	0.273968	0.127618	2.14678	0.0318106	0.0496155
htpG	6994.12	0.274947	0.0841202	3.2685	0.00108119	0.00231534
rpoB	27975.9	0.278703	0.0998573	2.79101	0.00525431	0.00980216
sufB	13015.1	0.279284	0.0650717	4.29194	1.77115e-05	4.69956e-05
rp1F	5089.25	0.282	0.0773964	3.64358	0.000268877	0.000609088
fusA	13190.4	0.282494	0.0747975	3.77678	0.000158867	0.000371775
recJ	5681.7	0.286016	0.0758801	3.76932	0.000163696	0.000381193
lysP	3458.44	0.291088	0.112173	2.59499	0.00945943	0.0166666
hyp_14	677.274	0.294196	0.126214	2.33092	0.0197574	0.0325703
nuoE	2849.21	0.29503	0.0905711	3.25745	0.00112419	0.00238443
atpG	6300.44	0.295191	0.081614	3.61692	0.000298131	0.000670795
rpsM	4719.23	0.303568	0.0821463	3.69546	0.000219489	0.000504068
murG	9976.25	0.303578	0.0700576	4.33326	1.46917e-05	3.9614e-05
mraY	10286.6	0.306163	0.0791181	3.8697	0.000108968	0.000264865
aroQ	1498.64	0.307433	0.09847	3.12209	0.00179569	0.0036685
nuoF	8533.69	0.307943	0.10051	3.06382	0.00218534	0.00439708
pRNA1	2783.66	0.308876	0.130698	2.36328	0.0181137	0.0301594
atpD	12248.1	0.31161	0.0716368	4.34986	1.36224e-05	3.68801e-05
rplR	3961.54	0.313886	0.0865011	3.6287	0.000284852	0.000643089
guaB	20126	0.315746	0.0683767	4.61773	3.87952e-06	1.12828e-05
rpsH	4097.07	0.317322	0.0793081	4.00113	6.30397e-05	0.000157245
ispG	66184.2	0.31855	0.112378	2.83462	0.00458797	0.00863161
rpmG	2938.69	0.329174	0.121035	2.71965	0.00653504	0.0118916
terC	2684.67	0.332847	0.104444	3.18684	0.00143835	0.00297497
rpmD	1860.37	0.334882	0.0999178	3.35158	0.00080353	0.00175459
hslU	17577.8	0.339728	0.129935	2.6146	0.00893331	0.0158234
gltP_degen	4492.68	0.34126	0.0765736	4.45663	8.32582e-06	2.33966e-05
nfo	2280.08	0.342391	0.0839406	4.07897	4.52348e-05	0.000114115
ompH	9469.12	0.346121	0.0821494	4.21331	2.51653e-05	6.57259e-05
glmU	8702.72	0.347417	0.0829699	4.18726	2.82337e-05	7.34518e-05
alaS	13496.4	0.347567	0.0728979	4.76786	1.86192e-06	5.71447e-06
atpH	4684.09	0.347956	0.117554	2.95997	0.00307671	0.00606239
lspA	4782.09	0.353975	0.0787569	4.49452	6.97261e-06	2.00162e-05
sppA	11383.1	0.355546	0.0680355	5.22589	1.73317e-07	5.82975e-07
carB	16100.4	0.355771	0.0751478	4.73429	2.19825e-06	6.62458e-06
aroK	2778.38	0.356479	0.107893	3.30399	0.000953202	0.00206786
rpsG	2791.9	0.361101	0.0956197	3.77643	0.000159093	0.000371775
fabZ	1795.19	0.361274	0.104359	3.46185	0.000536486	0.00118704
BCI_0451	11473.7	0.362366	0.0777944	4.65799	3.19305e-06	9.40961e-06
dxs	5582.25	0.363927	0.0765954	4.75129	2.02119e-06	6.14665e-06
dcd	2580.88	0.3648	0.112431	3.24467	0.00117588	0.00247047
clpX	10425.9	0.367761	0.0791675	4.64535	3.39497e-06	9.96059e-06
gshB	9413.11	0.370724	0.0987316	3.75486	0.000173436	0.000402468
adk	4012.6	0.383503	0.0931885	4.11534	3.86601e-05	9.90293e-05
atpA	20155	0.389775	0.0868814	4.48628	7.24766e-06	2.0628e-05
murD	11816.5	0.390583	0.0780201	5.00619	5.55188e-07	1.77767e-06
rpmJ	1137.85	0.392104	0.129084	3.03758	0.00238483	0.00476967
nusG	10738.8	0.392801	0.0724055	5.42501	5.79497e-08	2.03129e-07
rpmI	2766.69	0.392883	0.0806172	4.87344	1.09673e-06	3.4292e-06
pth	1688.91	0.395389	0.0906968	4.35946	1.30386e-05	3.5589e-05
rplA	11560.5	0.397323	0.0899149	4.41888	9.92122e-06	2.77627e-05
thiD	6886.39	0.400444	0.0974701	4.10837	3.98454e-05	0.000101675
hflC	6371.7	0.409082	0.0911019	4.49038	7.10964e-06	2.0322e-05
rpmA	3684.86	0.409443	0.114155	3.58671	0.000334873	0.000750927
thrS	8912.56	0.413756	0.0754804	5.48164	4.21391e-08	1.49427e-07
priA	4174.57	0.417778	0.0900122	4.64135	3.46132e-06	1.01107e-05
secE	4587.54	0.417912	0.0740876	5.64078	1.69285e-08	6.19471e-08
nuoH	4645.74	0.427257	0.0979927	4.36009	1.30007e-05	3.5589e-05
rpsU	1469.53	0.427554	0.0901316	4.74366	2.09891e-06	6.35397e-06
infC	7686.88	0.428235	0.0713339	6.00325	1.9341e-09	7.80671e-09
suhB	4812.36	0.431028	0.099044	4.35188	1.34975e-05	3.66911e-05
hyp_5	1929.92	0.431663	0.111795	3.86119	0.000112837	0.000273271
rpsO	8775.39	0.43513	0.072862	5.97197	2.34399e-09	9.34789e-09
folE	1135.26	0.436848	0.0993551	4.39684	1.09839e-05	3.06078e-05
acpP	11392.6	0.437491	0.0859366	5.09086	3.56444e-07	1.16942e-06
tig	3113.73	0.438172	0.0897889	4.88003	1.06072e-06	3.33226e-06
tsf	4918.51	0.440906	0.077097	5.71884	1.07251e-08	4.01288e-08
rplQ	3362.89	0.444836	0.119376	3.72634	0.000194276	0.000449264
lon	40244.3	0.455075	0.0806443	5.643	1.67116e-08	6.14913e-08
carA	5778.42	0.457205	0.0801031	5.7077	1.14511e-08	4.26057e-08
smpB	9153.26	0.457336	0.0818436	5.58793	2.29795e-08	8.3176e-08
rplX	2454.7	0.461332	0.0913246	5.05156	4.3822e-07	1.42368e-06
rpsA	39810.3	0.461667	0.0948282	4.86846	1.12473e-06	3.50032e-06
mutM	13219.4	0.464657	0.111471	4.16841	3.06725e-05	7.88722e-05
hyp_17	1315.94	0.466176	0.101269	4.60336	4.1572e-06	1.20378e-05
glmS	13110.1	0.468374	0.0640229	7.31572	2.56001e-13	1.36398e-12
rplK	7276.85	0.47992	0.0729766	6.57635	4.82145e-11	2.16965e-10
clpB	20840.9	0.499585	0.115446	4.32744	1.5085e-05	4.05106e-05
trxA	6755.75	0.502037	0.0881242	5.69693	1.21987e-08	4.5135e-08
ddlA	10016.9	0.502399	0.0675376	7.43881	1.01597e-13	5.59201e-13
minC	15751.9	0.502522	0.090993	5.52264	3.33934e-08	1.1957e-07
Phe_tRNA	236.5	0.506462	0.230054	2.20149	0.0277011	0.0440308
recA	7183.1	0.512325	0.0979716	5.22932	1.70134e-07	5.77748e-07
rpsB	4143.85	0.512786	0.080625	6.36014	2.01576e-10	8.83221e-10
hyp_27	416.179	0.513002	0.151528	3.38553	0.000710407	0.00156666
dut	4188.14	0.513941	0.0810376	6.34201	2.26787e-10	9.80781e-10
rplJ	10550.3	0.517036	0.0836602	6.18019	6.40262e-10	2.68185e-09
rpsN	3810.3	0.517257	0.0897454	5.76361	8.23359e-09	3.15148e-08
rplE	4642.41	0.519244	0.0995559	5.21561	1.83217e-07	6.1318e-07
hflX	4679.02	0.521145	0.0853479	6.10613	1.02077e-09	4.22256e-09
rplU	4837.32	0.522064	0.0998498	5.2285	1.70895e-07	5.77748e-07
sodA	12441	0.526498	0.0987861	5.32967	9.83895e-08	3.3952e-07
nrdA	14005.2	0.529818	0.0715585	7.40397	1.32169e-13	7.21513e-13
pyrE	721.808	0.541292	0.154451	3.50461	0.00045727	0.00101514
nuoB	9291.61	0.542214	0.0853553	6.35243	2.11933e-10	9.22533e-10
pRNA11	31029	0.543036	0.115259	4.71143	2.45981e-06	7.34634e-06
ndk	2550.45	0.556939	0.118045	4.71801	2.38166e-06	7.14498e-06
rplN	2509.46	0.560578	0.0924813	6.06152	1.34839e-09	5.50938e-09
nuc	9132.52	0.568749	0.113026	5.03202	4.8533e-07	1.5615e-06
ispH	15066.6	0.570154	0.0788328	7.23245	4.7437e-13	2.41168e-12
hyp_8a	7679.25	0.577293	0.105317	5.48147	4.21806e-08	1.49427e-07
pRNA16	1040.7	0.577544	0.13217	4.3697	1.24417e-05	3.42403e-05
trmD	15282.2	0.577643	0.071618	8.06561	7.28708e-16	4.53569e-15
yhgI	4912.24	0.58042	0.0973791	5.96042	2.51594e-09	9.9149e-09
rplL	6969.2	0.611099	0.0841854	7.25896	3.90076e-13	2.01388e-12
rpoD	20978.3	0.61834	0.0770037	8.03	9.74721e-16	6.01078e-15
ispA	3035.1	0.62063	0.0826313	7.51082	5.8756e-14	3.31623e-13
metG	9248.37	0.625936	0.0856461	7.3084	2.70345e-13	1.42897e-12
cysE	6563.6	0.631595	0.121751	5.18758	2.13046e-07	7.05912e-07
miaB	9717.11	0.635744	0.0932647	6.81656	9.32474e-12	4.35115e-11
nuoI	5026.47	0.639696	0.101196	6.32137	2.59261e-10	1.11399e-09
ispE	4168.86	0.651687	0.0841903	7.74064	9.89166e-15	5.82995e-14
cysS	4325.3	0.653535	0.0758526	8.61585	6.94238e-18	4.81628e-17
rpsT	2437.76	0.658205	0.143773	4.57809	4.69248e-06	1.3529e-05
BCI_0569	596821	0.660362	0.0948126	6.96492	3.28583e-12	1.58577e-11
pal	5141.28	0.672382	0.0936	7.18357	6.79135e-13	3.42654e-12
secG	4625.92	0.680829	0.277542	2.45307	0.0141644	0.0240038
nuoJ	5535.05	0.6834	0.0858571	7.95974	1.72405e-15	1.05341e-14
folC	2499.51	0.689324	0.0812296	8.48612	2.13655e-17	1.46695e-16
hslV	18421.6	0.696268	0.318612	2.18532	0.0288654	0.0455683
rimM	10581.3	0.712218	0.0753772	9.44871	3.43025e-21	2.7197e-20
ssb	12599	0.730013	0.0753559	9.68754	3.40645e-22	2.83587e-21
nrdB	9161.64	0.739403	0.0852904	8.66924	4.35023e-18	3.08085e-17
BCI_0384	2290.09	0.744015	0.109153	6.81628	9.34256e-12	4.35115e-11
hyp_4	40741.3	0.749427	0.116897	6.41098	1.44585e-10	6.37706e-10
iscS	5738.82	0.749448	0.0728245	10.2912	7.72417e-25	7.24549e-24
rplD	16857.2	0.755962	0.0912889	8.28099	1.22159e-16	7.97629e-16
hyp_13	1795	0.759821	0.0956389	7.94468	1.94686e-15	1.17874e-14
BCI_0174	2785.54	0.763695	0.0841761	9.07258	1.16231e-19	8.89771e-19
thiI	886.05	0.766625	0.125593	6.10404	1.03418e-09	4.25165e-09
rpsP	4757.85	0.769789	0.0910814	8.45167	2.87177e-17	1.93192e-16
mutH	1443.11	0.780687	0.111139	7.02443	2.14938e-12	1.05257e-11
rpsJ	10110.2	0.78189	0.0945573	8.26895	1.3514e-16	8.73816e-16
rpsC	33065.4	0.789616	0.0700423	11.2734	1.77548e-29	1.81918e-28
rplC	21347.3	0.795508	0.101425	7.8433	4.3886e-15	2.63316e-14
rpsS	9282.64	0.801245	0.10322	7.76252	8.32595e-15	4.95097e-14
rplP	22749.9	0.82816	0.0764571	10.8317	2.43616e-27	2.386e-26
groEL	115594	0.829565	0.349074	2.37648	0.0174789	0.0292486
hfq	715.607	0.845036	0.119154	7.09197	1.32213e-12	6.5712e-12
rplB	30443.9	0.849226	0.0666665	12.7384	3.61576e-37	4.22473e-36
gpsA	9823.12	0.852703	0.0885079	9.6342	5.73361e-22	4.71431e-21
rplV	11899.6	0.853579	0.101587	8.40245	4.37246e-17	2.91206e-16
clpP	10497.7	0.863183	0.0779326	11.076	1.64022e-28	1.65513e-27
gyrA	44270.1	0.879813	0.0699005	12.5866	2.50115e-36	2.82334e-35
pyrD	13471.8	0.881241	0.0659898	13.3542	1.11967e-40	1.38093e-39
rpmC	10157.1	0.891453	0.0883795	10.0867	6.32923e-24	5.62036e-23
rpsQ	17039.4	0.896687	0.073947	12.1261	7.68511e-34	8.2553e-33
rplW	8433.24	0.907673	0.0891282	10.1839	2.33962e-24	2.1345e-23
Met_tRNA2	954.753	0.912753	0.146004	6.25157	4.06347e-10	1.71283e-09
tolB_gene	1909.23	0.919991	0.128705	7.14805	8.80213e-13	4.40768e-12
pRNA17	2225.93	0.922838	0.179265	5.14789	2.63431e-07	8.68541e-07
hsp	46361.6	0.96694	0.129422	7.47124	7.94411e-14	4.40898e-13
purN	3837.04	1.02363	0.114938	8.90586	5.29742e-19	3.92009e-18
orn	14701.4	1.03898	0.11284	9.20748	3.33885e-20	2.61609e-19
cca	11929.8	1.0726	0.0813079	13.1918	9.77752e-40	1.18397e-38
purM	8285.08	1.1106	0.0678731	16.3629	3.52214e-60	5.45522e-59
metC	18733.9	1.12584	0.0741795	15.1773	4.99911e-52	6.93627e-51
lolB	3966.3	1.12893	0.0881173	12.8117	1.41089e-37	1.67796e-36
folD	9213.03	1.13282	0.0692931	16.3482	4.47704e-60	6.77661e-59
pRNA4	1800.06	1.15461	0.115746	9.97537	1.95363e-23	1.68976e-22
rnhA	543.405	1.19187	0.163212	7.30254	2.82391e-13	1.46932e-12
gidA	4157.02	1.25601	0.0769943	16.313	7.97666e-60	1.18055e-58
accD	4303.32	1.50504	0.0839545	17.9268	7.28371e-72	1.31107e-70
metJ_degen	740.971	1.76775	0.143683	12.3031	8.71635e-35	9.51654e-34
gcvT	2527.81	1.81538	0.0873743	20.777	6.98519e-96	1.60418e-94
aspA	12094.9	2.47055	0.073652	33.5436	1.11589e-246	9.28975e-245
Val_tRNA2	2210.45	2.55891	0.438211	5.83944	5.23776e-09	2.02811e-08
marR	8426.56	2.60776	0.112112	23.2603	1.11847e-119	3.10376e-118
momp	79349	2.64412	0.0908007	29.1201	2.00004e-186	8.32518e-185
